# Supplementary material for: Iodine catalyzed four-component reaction: a straightforward one-pot synthesis of functionalized pyrroles under metal-free conditions
Source: Royal Society of Chemistry journal article supplement (doi:10.1039/c2ra00982j), 2012-01-01
Supplement: c2ra00982j.pdf [file c2ra00982j.pdf]

Copies of spectra

**Iodine catalyzed four-component reaction: A straightforward one-pot synthesis of functionalized pyrroles under metal-free conditions**

G. Rajeshwar Reddy,<sup>a,b</sup> T. Ram Reddy,<sup>a</sup> Suju C. Joseph,<sup>a</sup> K. Sateesh Reddy,<sup>a</sup> L. Srinivasula Reddy,<sup>a</sup> P. Mahesh Kumar,<sup>a</sup> and Manojit Pal<sup>c,\*</sup>

<sup>a</sup>*Custom Pharmaceutical Services, Dr. Reddy's Laboratories Limited, Bollaram Road Miyapur, Hyderabad 500 049, India*

<sup>b</sup>*Chemistry Division, Institute of Science and Technology, JNT University, Kukatpally, Hyderabad 500072, Andhra Pradesh, India*

<sup>c</sup>*Institute of Life Sciences, University of Hyderabad Campus, Gachibowli, Hyderabad 500 046, India.*

E-mail: [manojitpal@rediffmail.com](mailto:manojitpal@rediffmail.com)

A009/CPFC-1/001 in CDCl<sub>3</sub>  
NMR-400

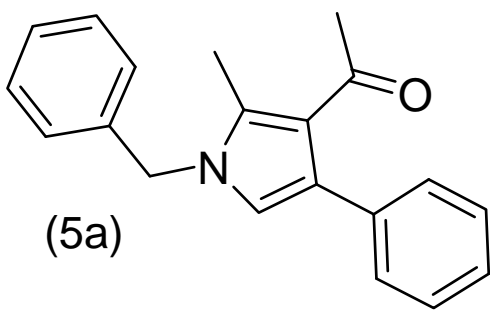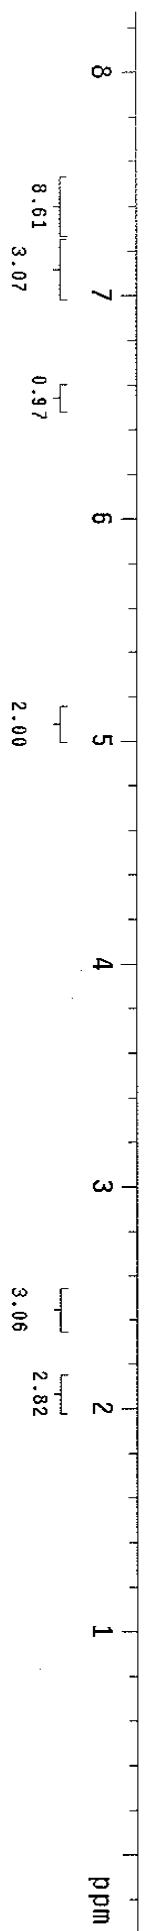

A009-CFPC-1-001 in CDCl<sub>3</sub>  
NMR-400

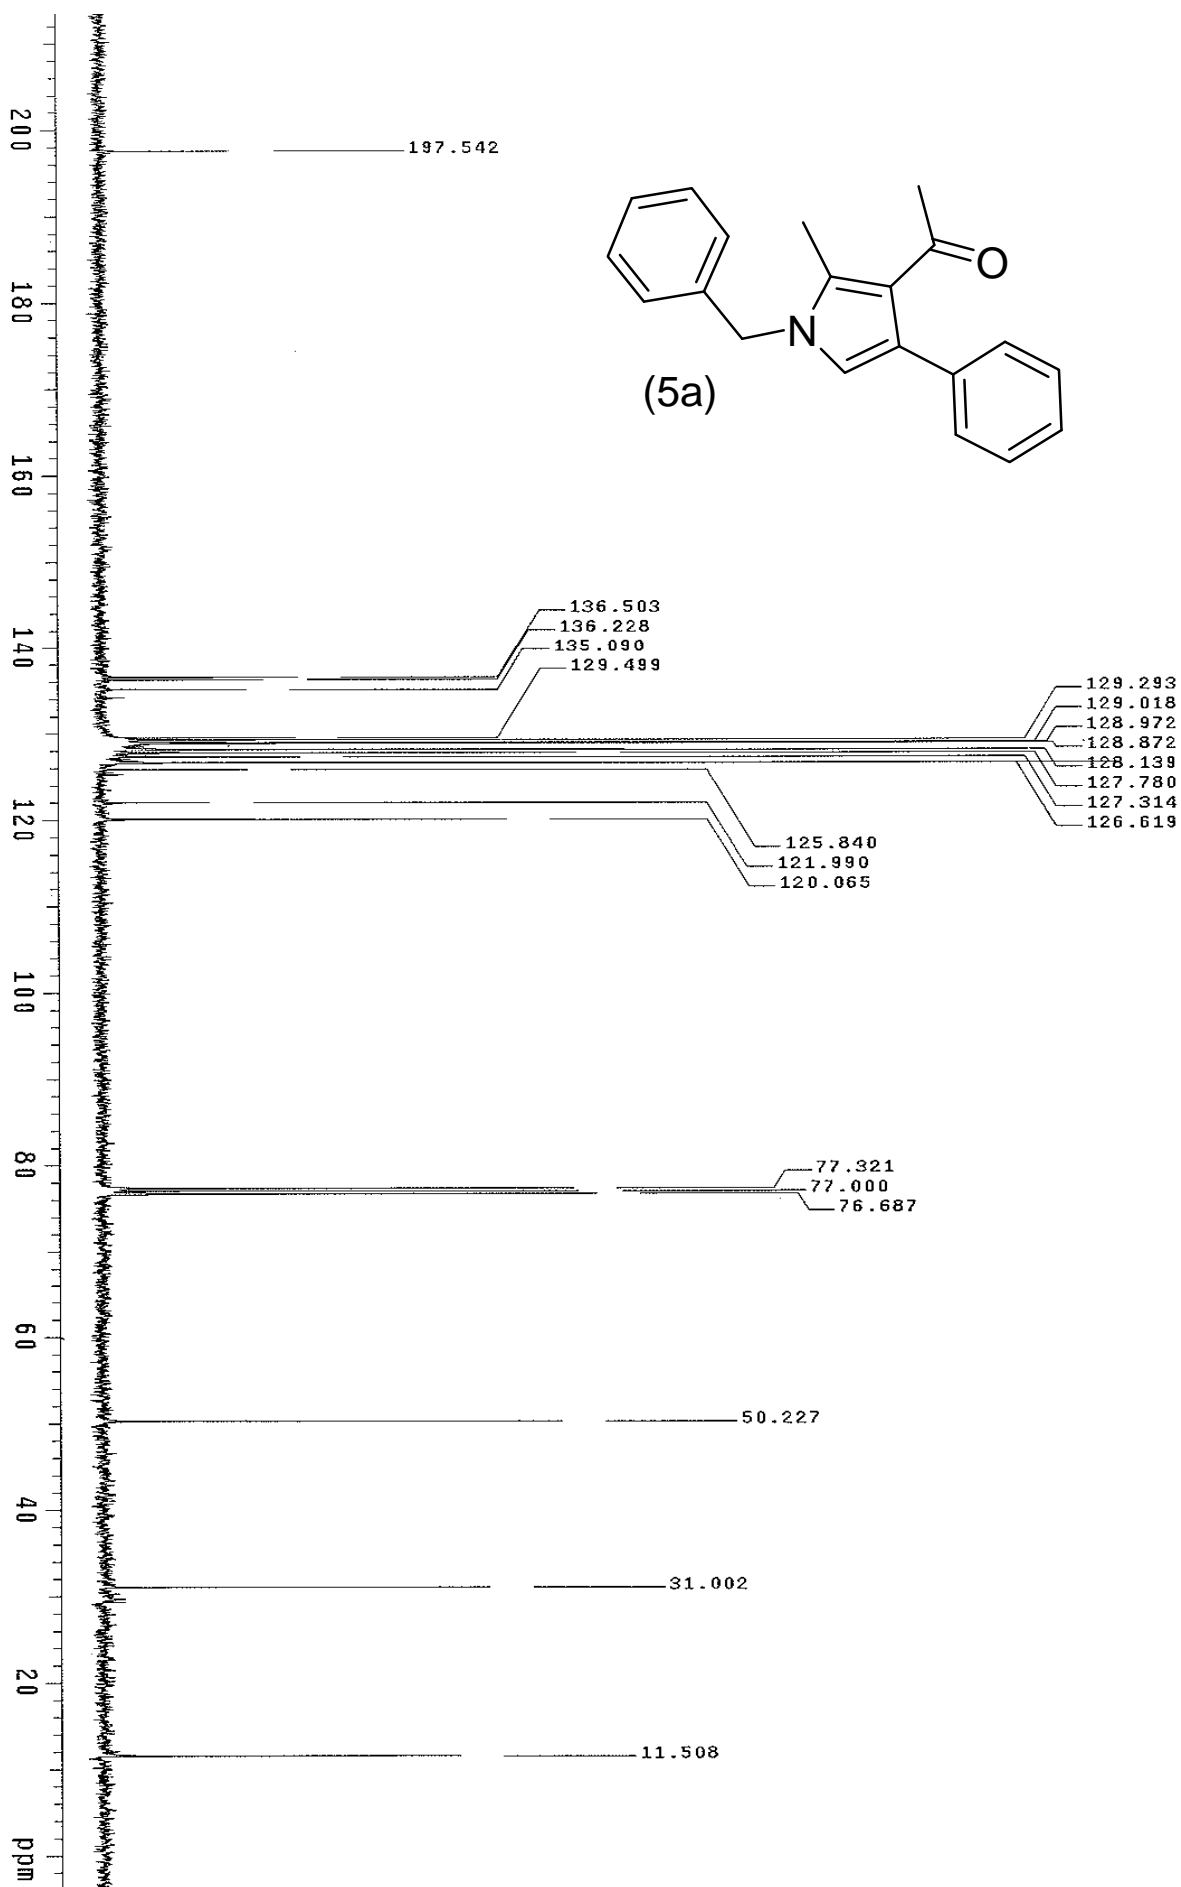

A009-CPFC-1/001

UT0911\_192.27 (0.609) Cm (27:32-72:79x0.010)  
290.1541

1: TOF MS ES+  
3.96e3

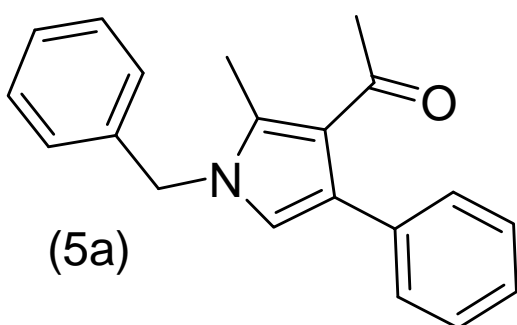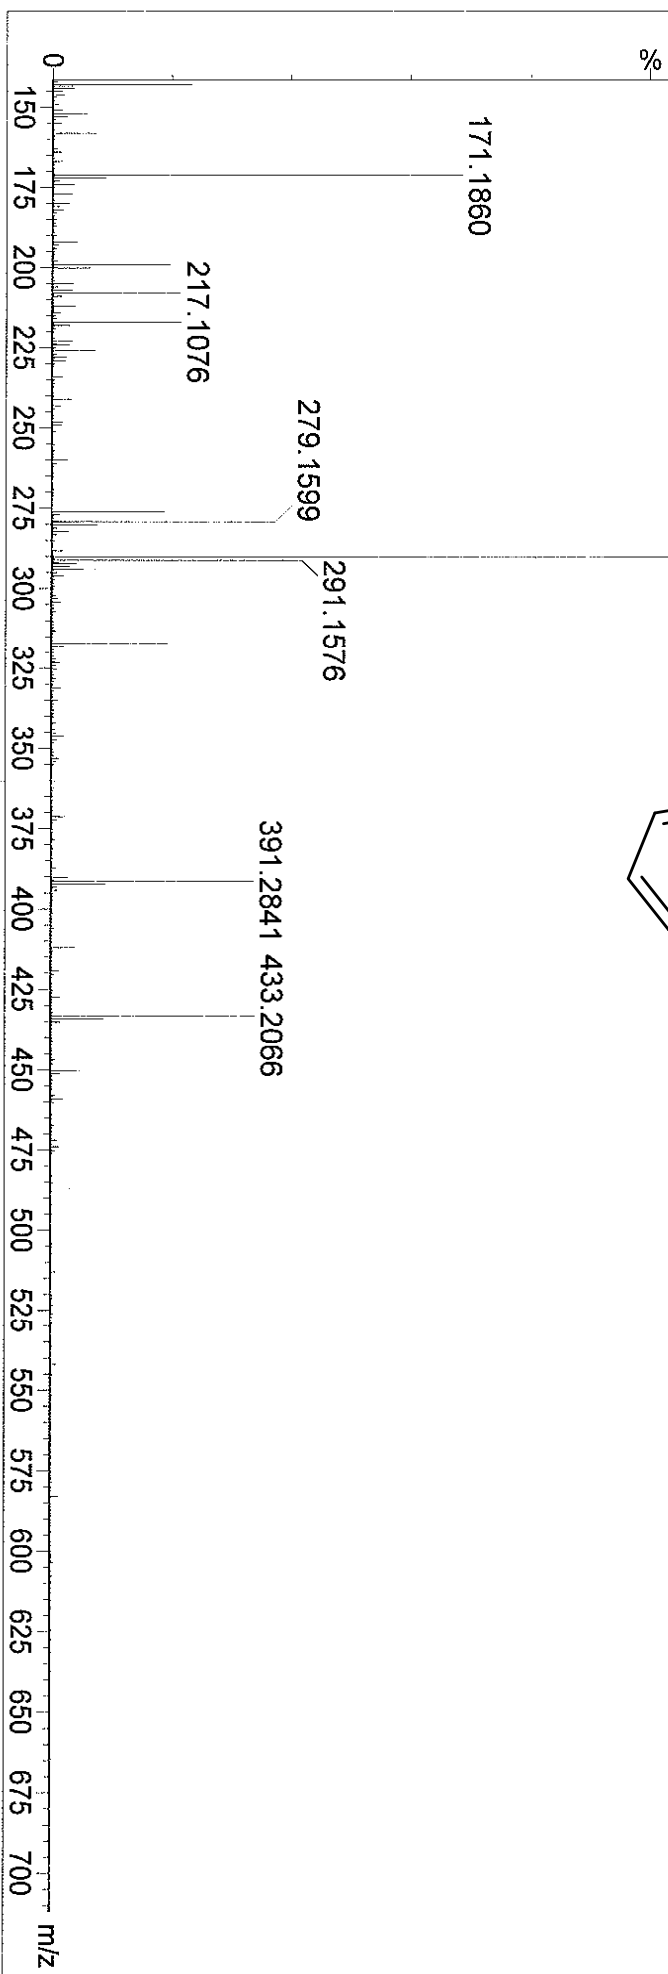

## Elemental Composition Report

### Single Mass Analysis

Tolerance = 5.0 PPM / DBE: min = 0.0, max = 80.0

Element prediction: Off

Number of isotope peaks used for i-FIT = 4

Monoisotopic Mass, Even Electron Ions

202 formula(e) evaluated with 1 results within limits (up to 4 best isotopic matches for each mass)

Elements Used:

C: 0-70 H: 0-80 N: 0-5 O: 0-10

A009-CPFC-1/001

UT0911\_192.27 (0.609) Cm (27:32-72:79x0.010)

1: TOF MS ES+  
3.96e+003

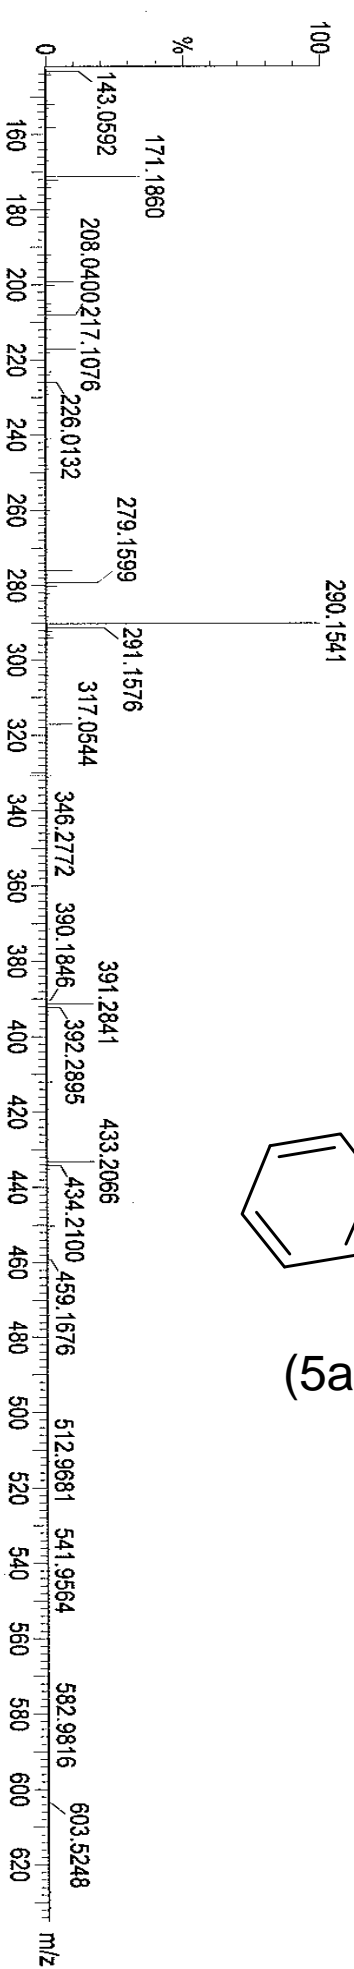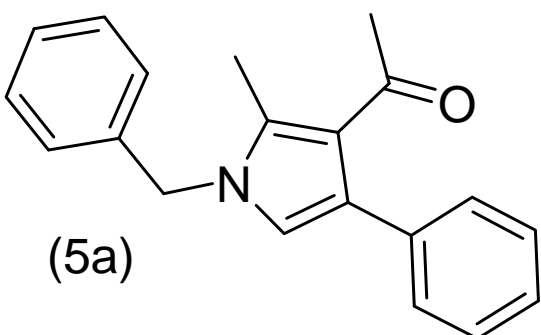

| Mass     | Calc. Mass | mbda | PPM  | DBE  | i-FITP | Formula     |
|----------|------------|------|------|------|--------|-------------|
| 290.1541 | 290.1545   | -0.4 | -1.4 | 11.5 | 28.2   | C20 H20 N O |

Minimum: 0.0  
Maximum: 5.0

A009/CPFC-1/002 in CDCl<sub>3</sub>  
NMR-400

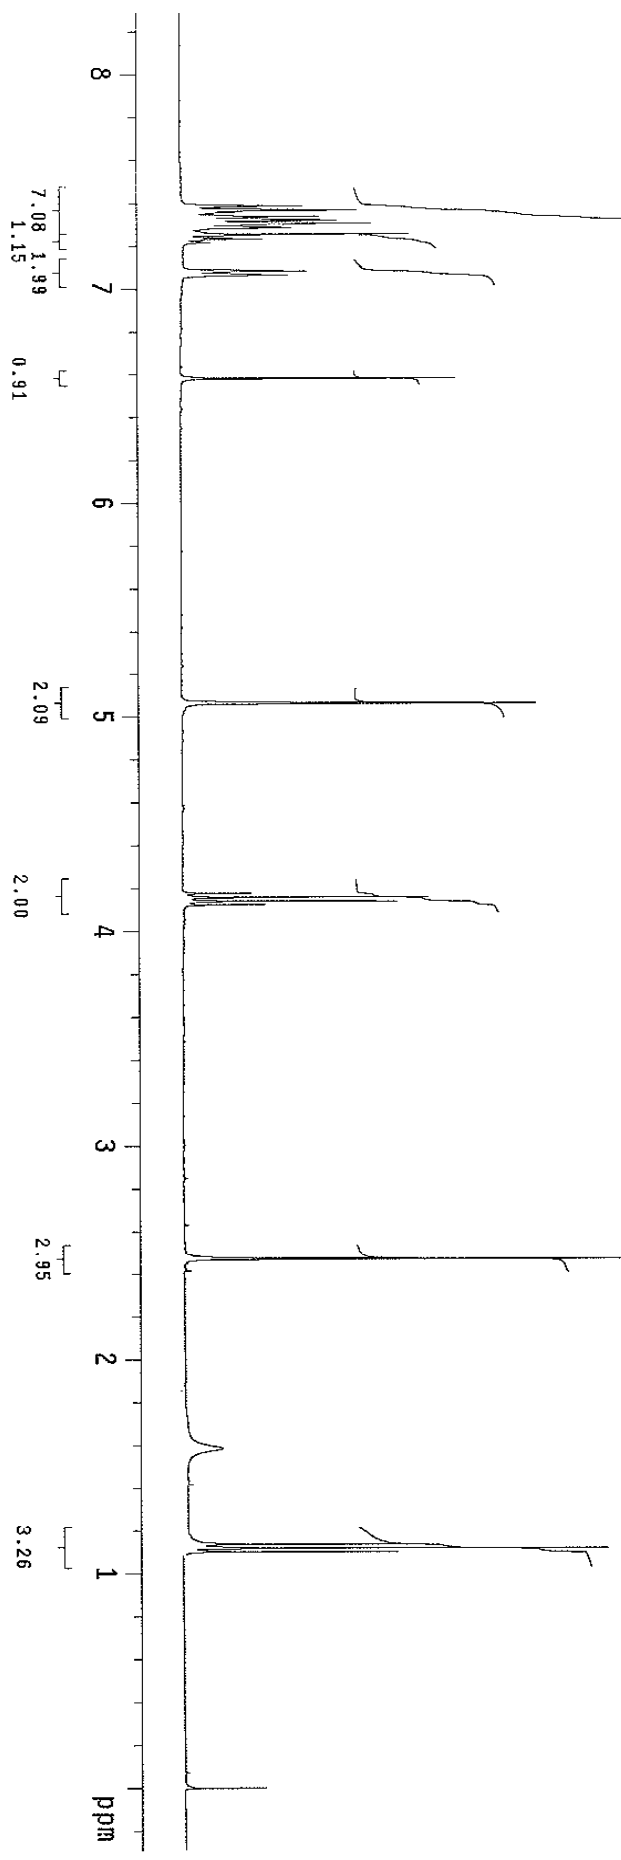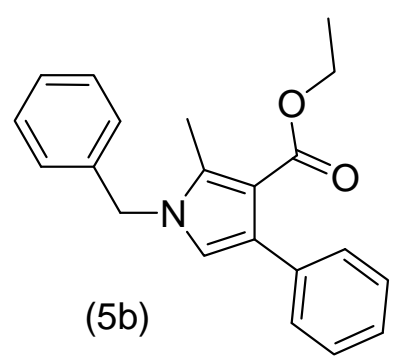

A009-CPFC-1-002 in CDCl<sub>3</sub>  
NMR-400

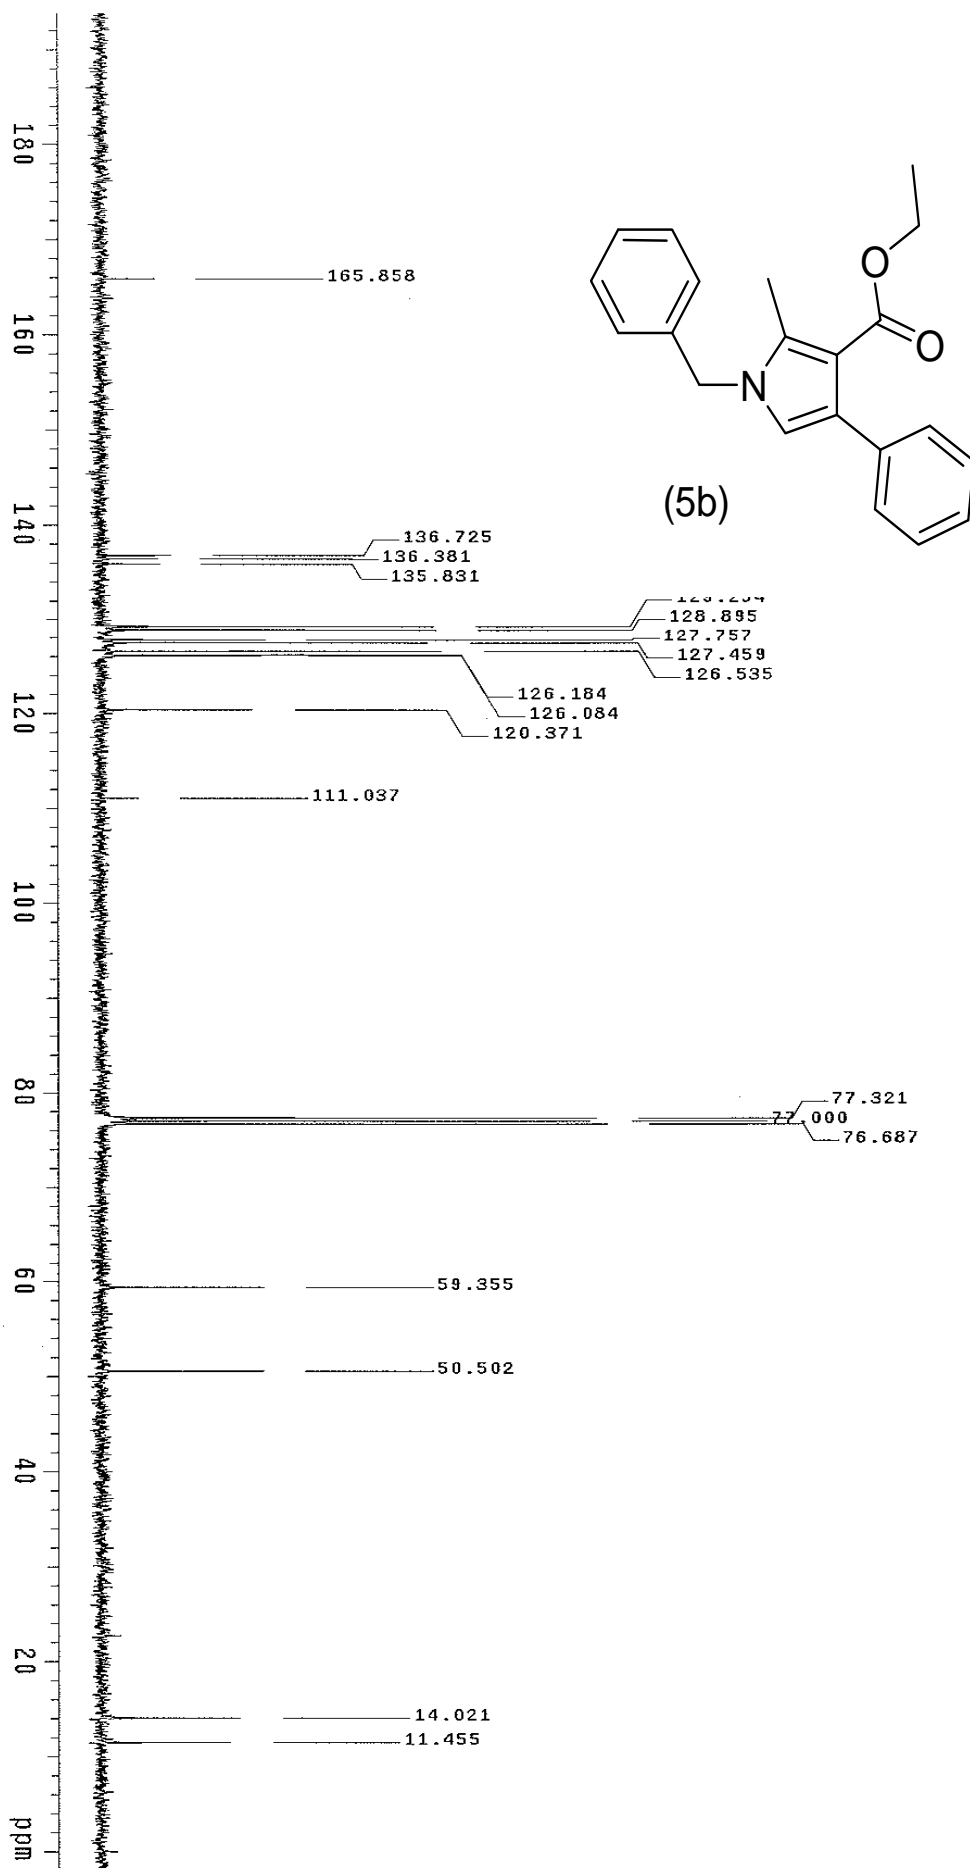

A009-CPFC-1/002

UT0911\_196.28 (0.626) Cm (28:32-60:79x0.010)  
320.1646

1: TOF MS ES+  
6.77e3

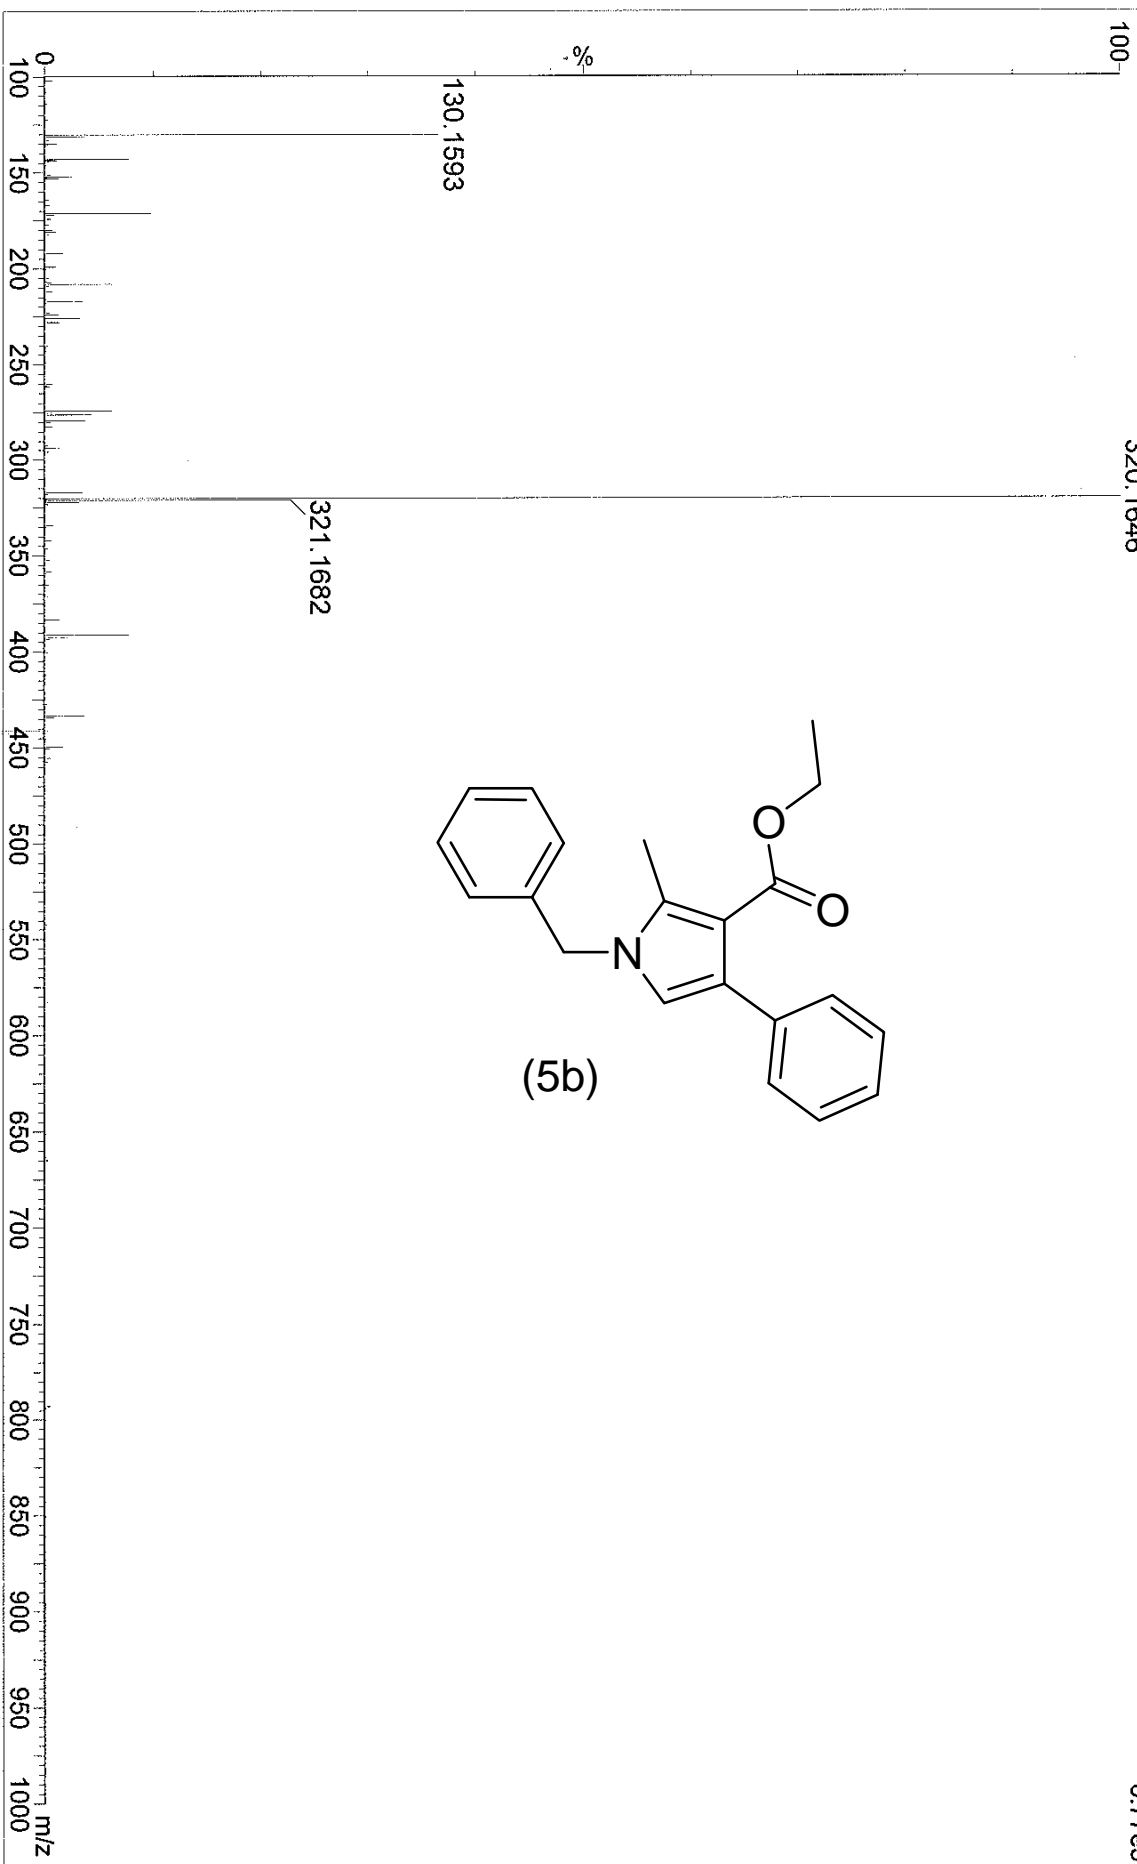



## Elemental Composition Report

### Single Mass Analysis

Tolerance = 5.0 PPM / DBE: min = 0.0, max = 80.0

Element prediction: Off

Number of isotope peaks used for i-FIT = 4

Monoisotopic Mass, Even Electron Ions

380 formula(e) evaluated with 1 results within limits (up to 4 best isotopic matches for each mass)

Elements Used:

C: 0-70 H: 0-80 N: 0-5 O: 0-10 Br: 0-1

A009-CPFC-1/002

UT0911\_196 28 (0.626) Cm (28:32:60:79x0.010)

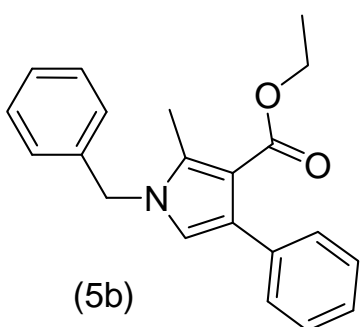

(5b)

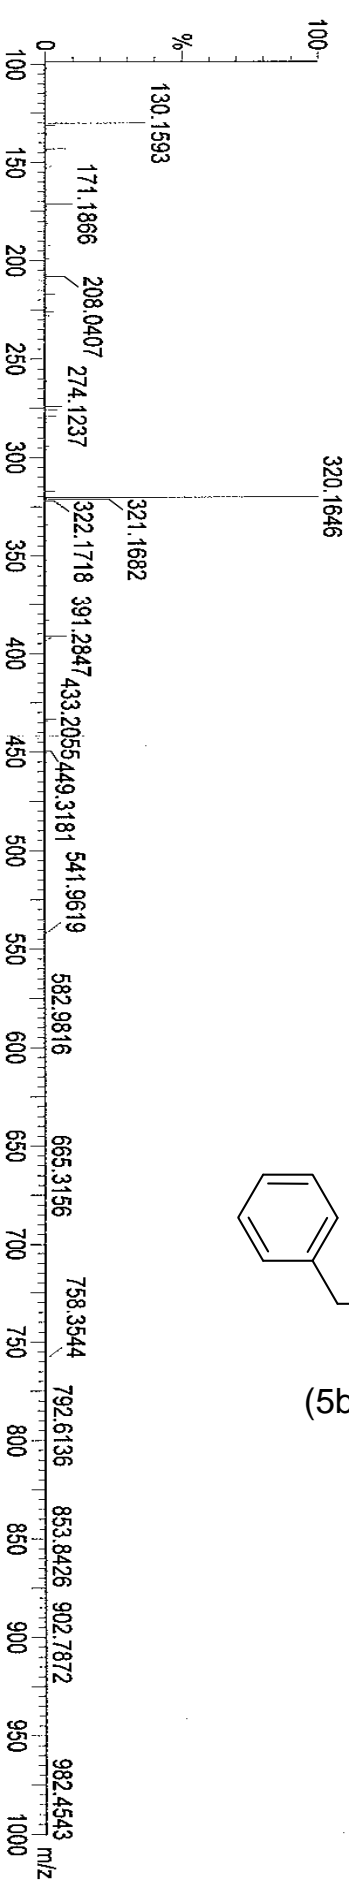

1: TOF MS ES+  
6.77e+003

| Mass     | Calc. Mass | mDa  | PPM  | DBE  | i-FIT | Formula      |
|----------|------------|------|------|------|-------|--------------|
| 320.1646 | 320.1651   | -0.5 | -1.6 | 11.5 | 2.6   | C21 H22 N O2 |

A009/GPFC-1/003 in CDCl<sub>3</sub>  
NMR-400

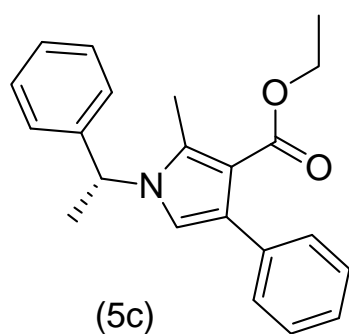

(5c)

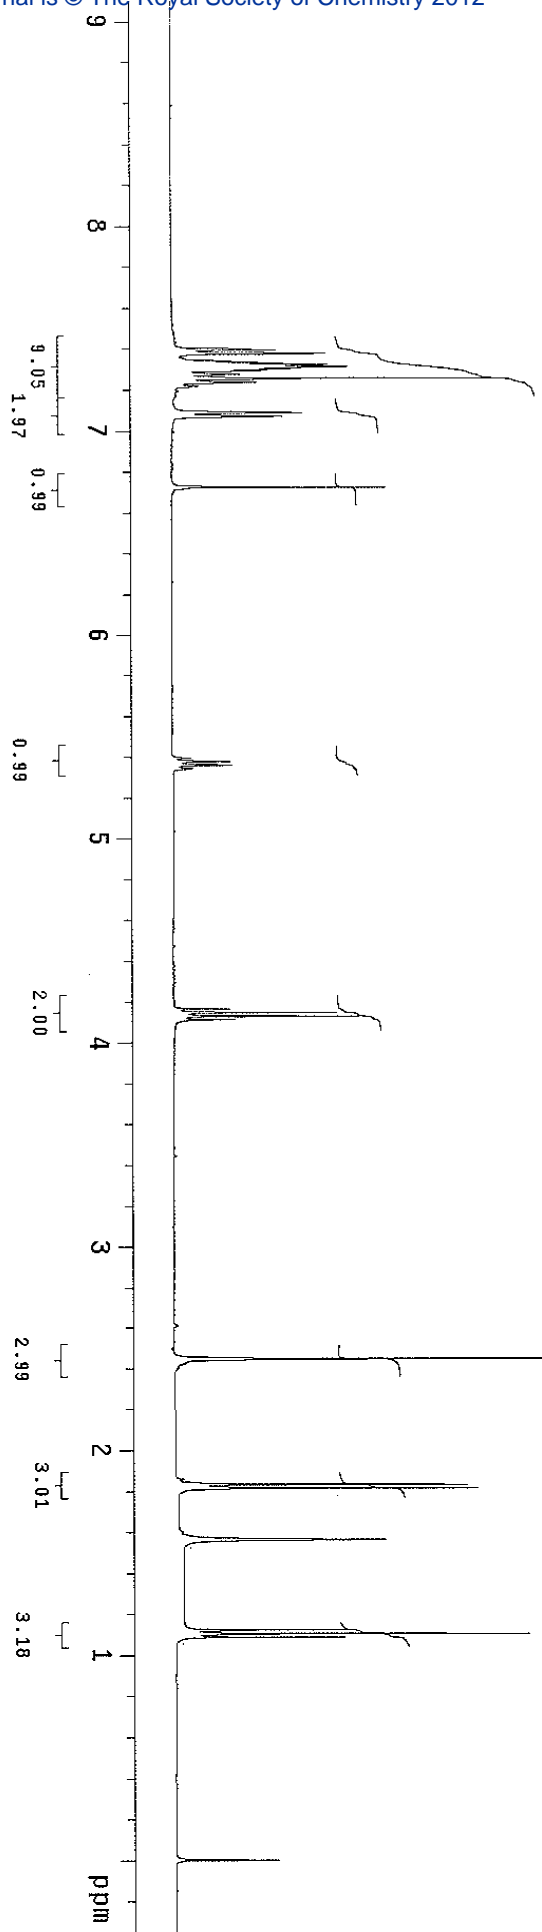

A009-CFC-1-003 in CDCl<sub>3</sub>  
NMR-400

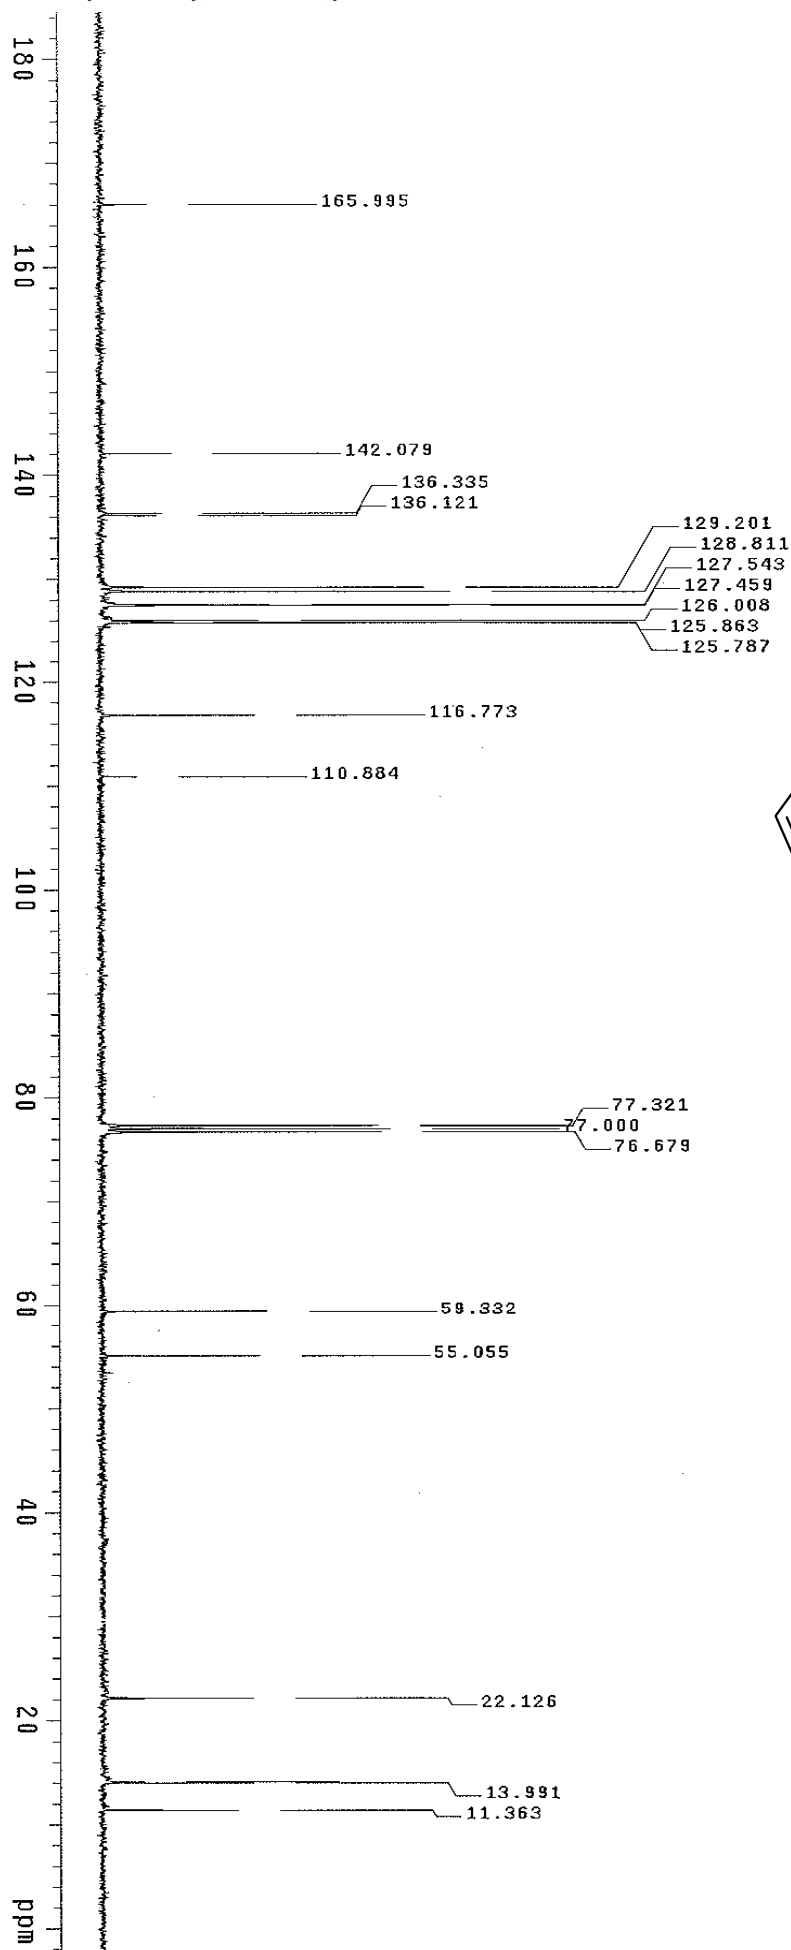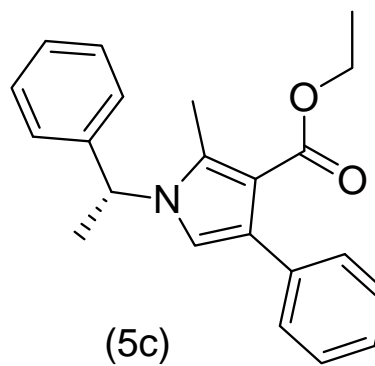

A009-CPFC-1/003

UT0911\_197\_33 (0.755) Cm (33.42-67.80x0.010)

334.1809

1: TOF MS ES+  
1.30e4

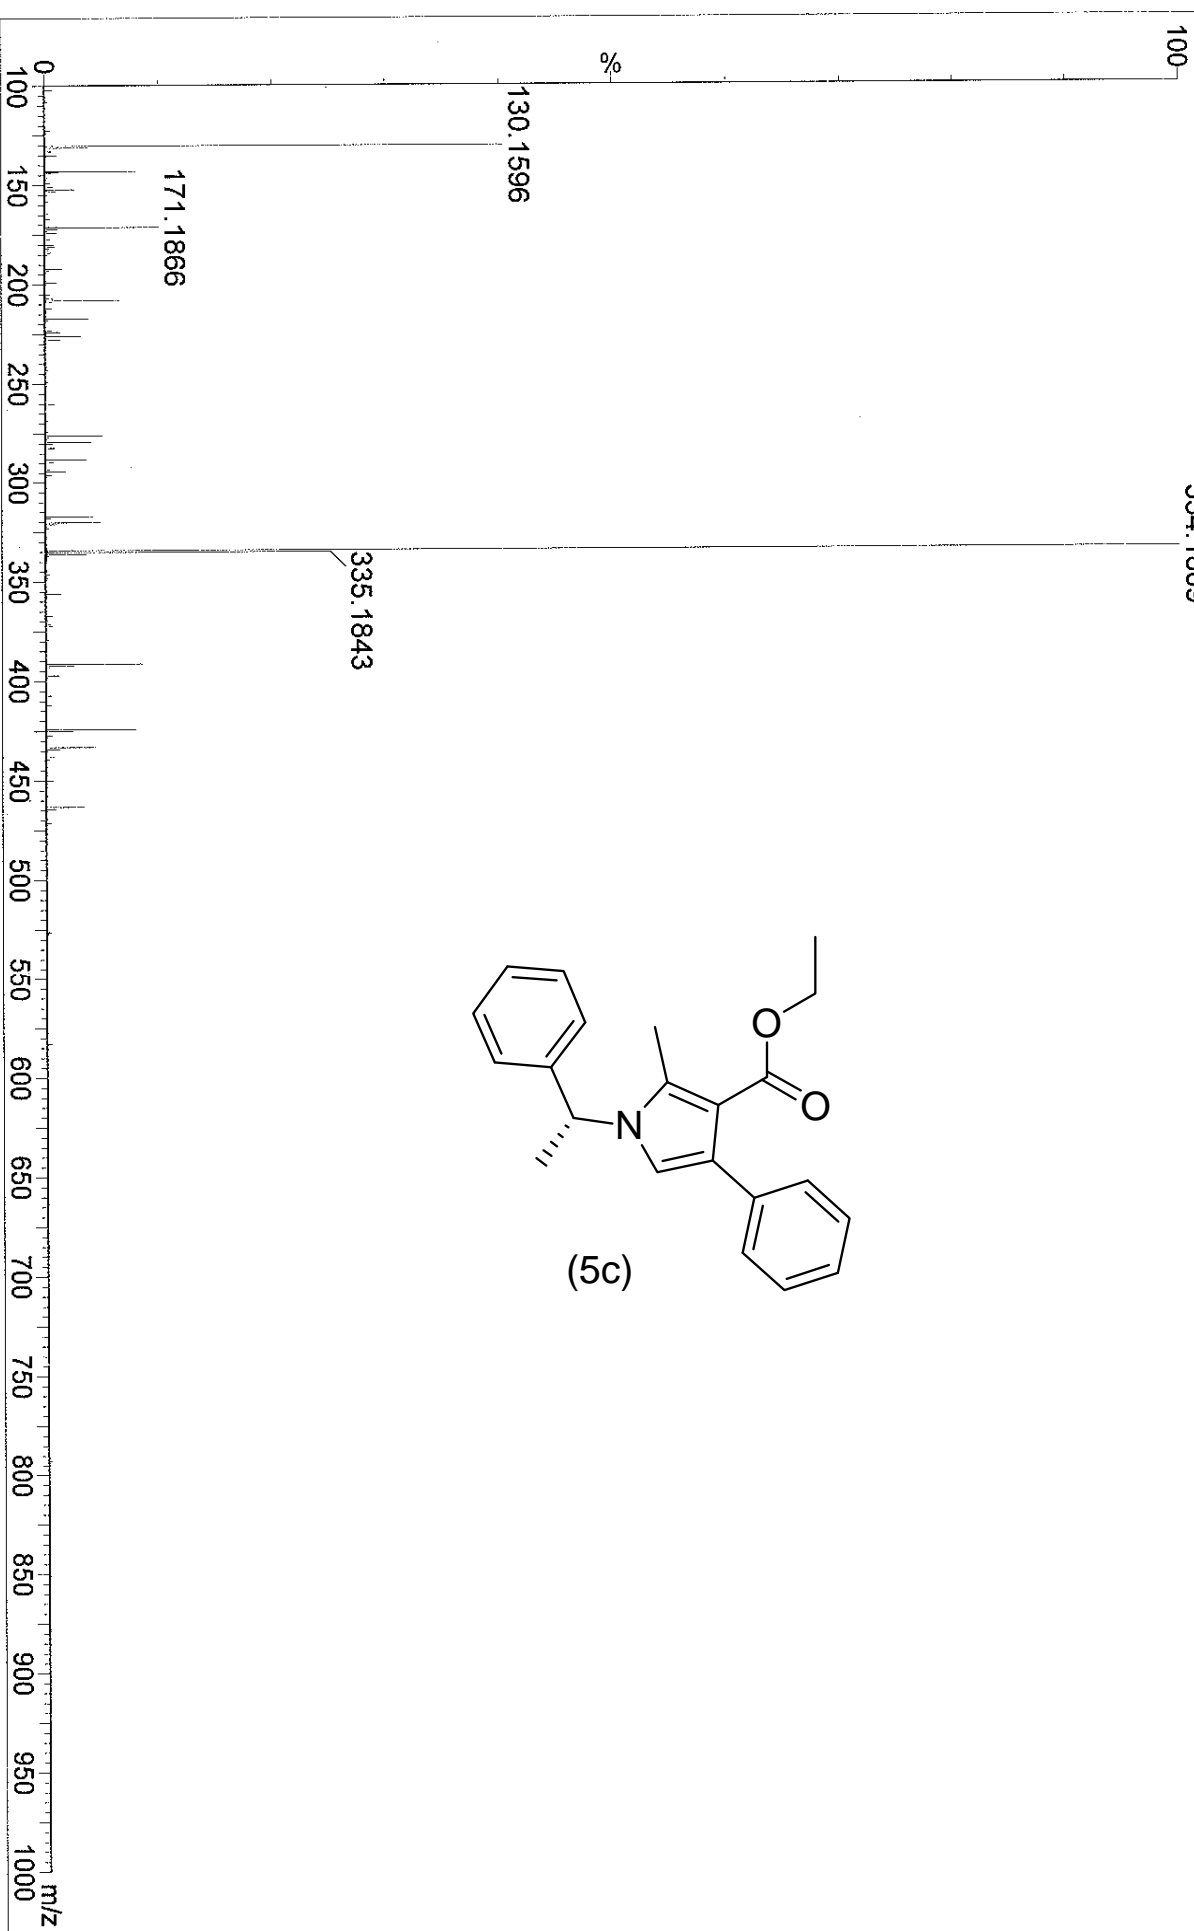

## Elemental Composition Report

### Single Mass Analysis

Tolerance = 5.0 PPM / DBE: min = 0.0, max = 80.0

Element prediction: Off

Number of isotope peaks used for I-FIT = 4

Monoisotopic Mass, Even Electron Ions

402 formula(e) evaluated with 1 results within limits (up to 4 best isotopic matches for each mass)

Elements Used:

C: 0-70 H: 0-80 N: 0-5 O: 0-10 Br: 0-1

A009-CPFC-1/003

UT0911\_197 33 (0.755) Cm (33:42-67:80x0.010)

1: TOF MS ES+  
1.30e+004

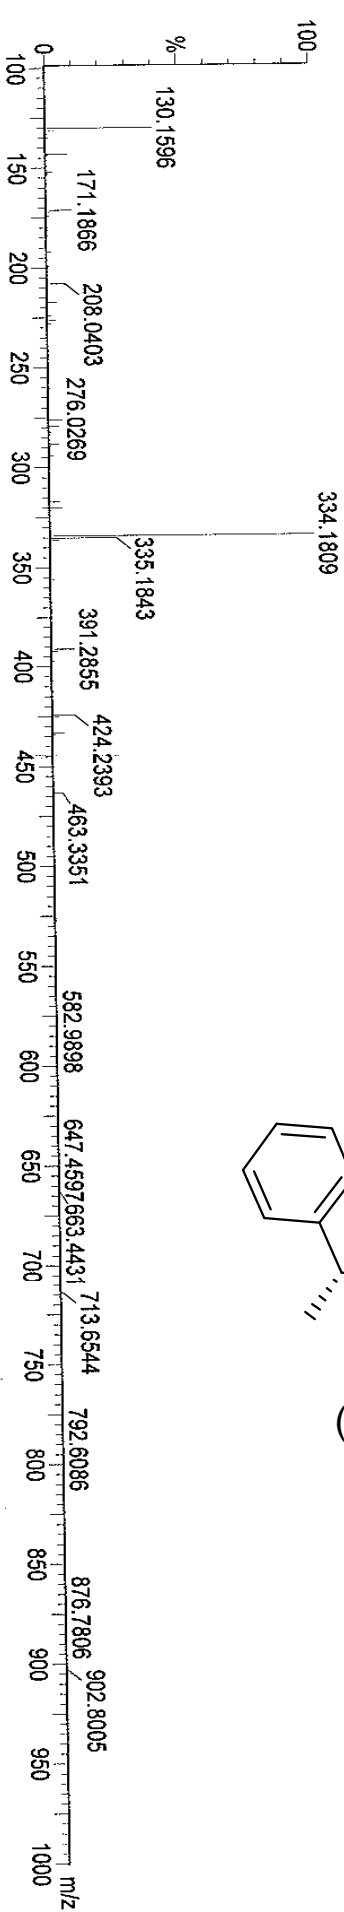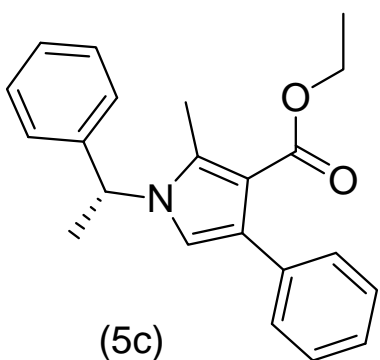

| Mass     | Calc. Mass | mDa | PPM | DBE  | i-FIT | Formula      |
|----------|------------|-----|-----|------|-------|--------------|
| 334.1809 | 334.1807   | 0.2 | 0.6 | 11.5 | 2.4   | C22 H24 N O2 |

Minimum: 5.0  
Maximum: 5.0

0.0  
80.0

A009/CPFC-1/004 in CDCl<sub>3</sub>  
NMR-400

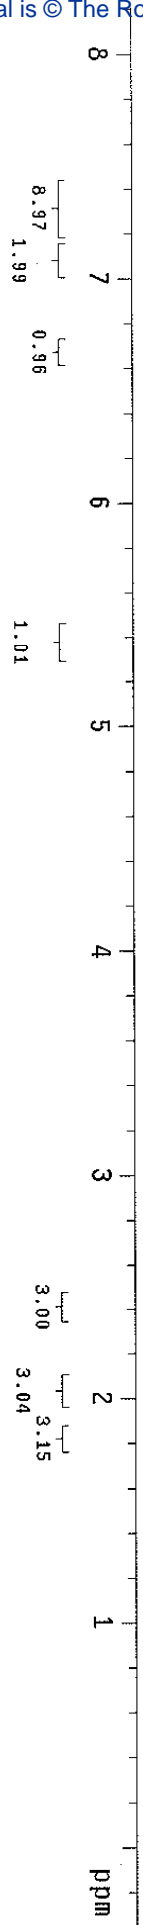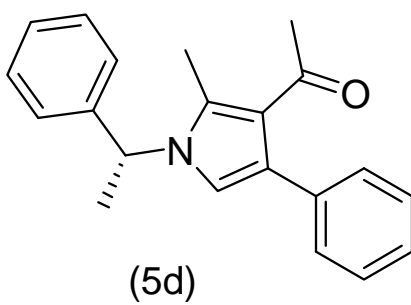

A009-CPFG-1-004 in CDCl<sub>3</sub>  
NMR-400

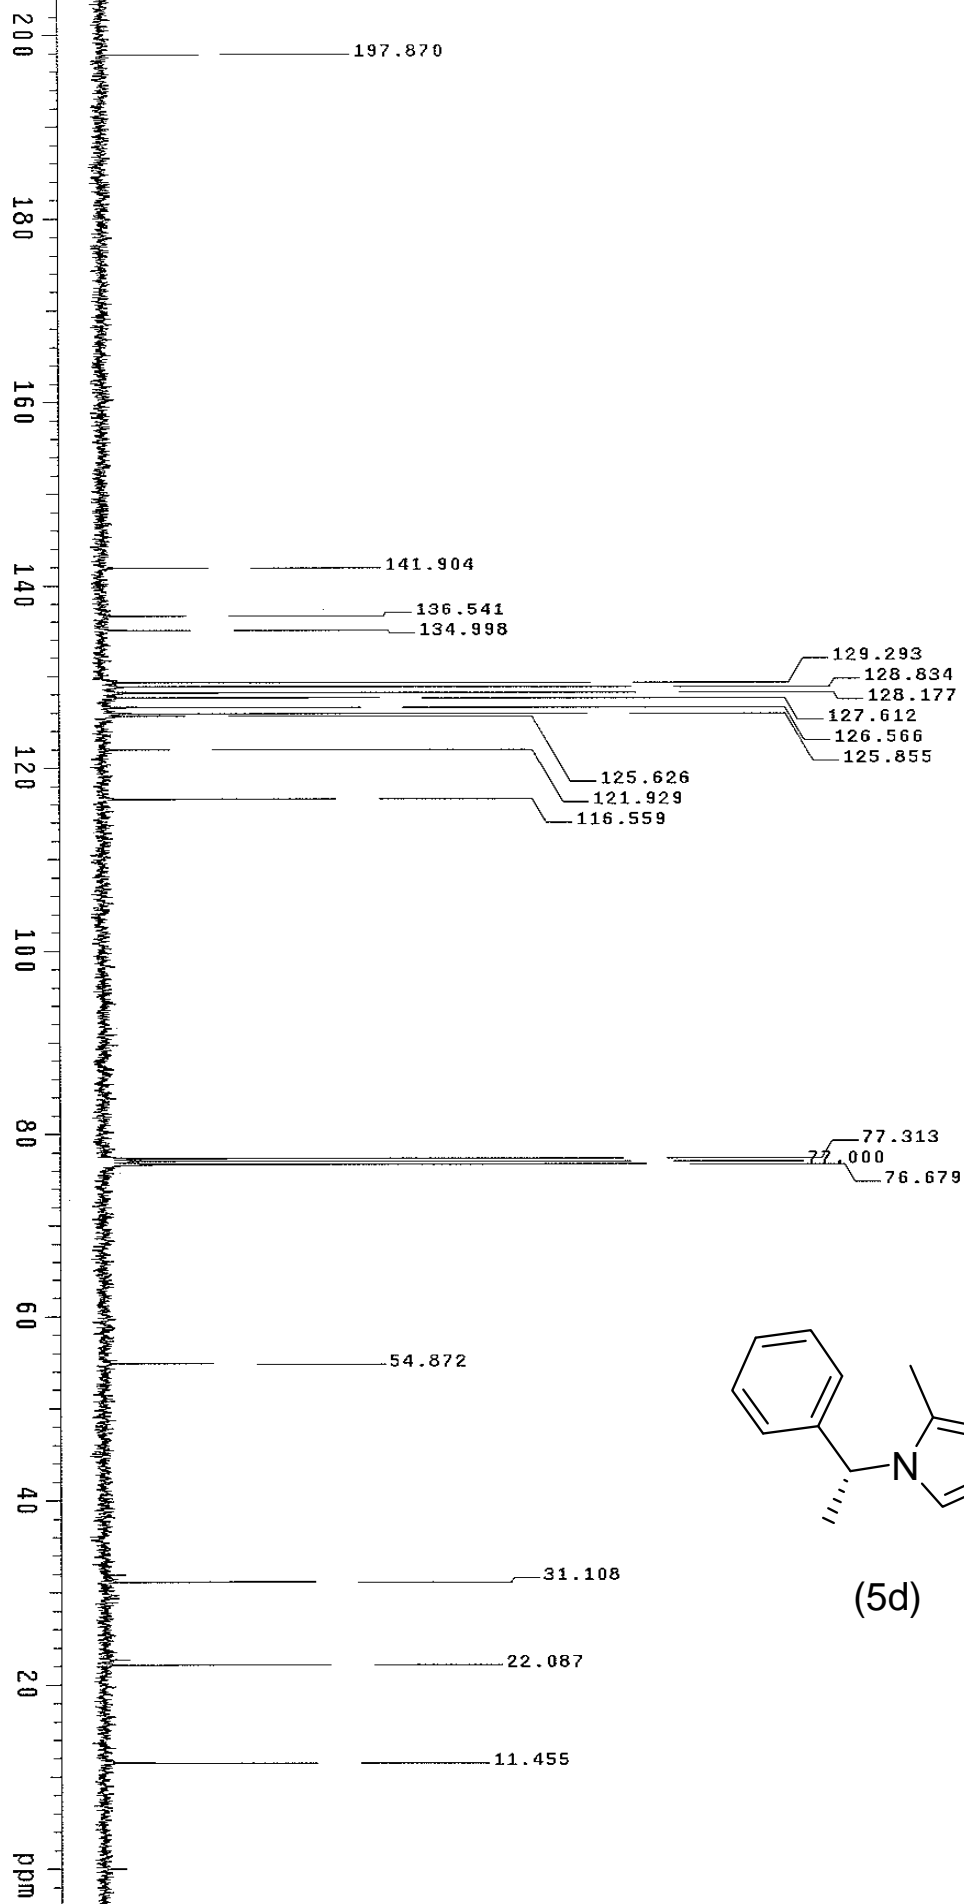

A009-CPFC-1/004

UT0911\_198.22 (0.507) Cm (22.24-62.71x0.010)  
304.1694

1: TOF MS ES+  
1.09e4

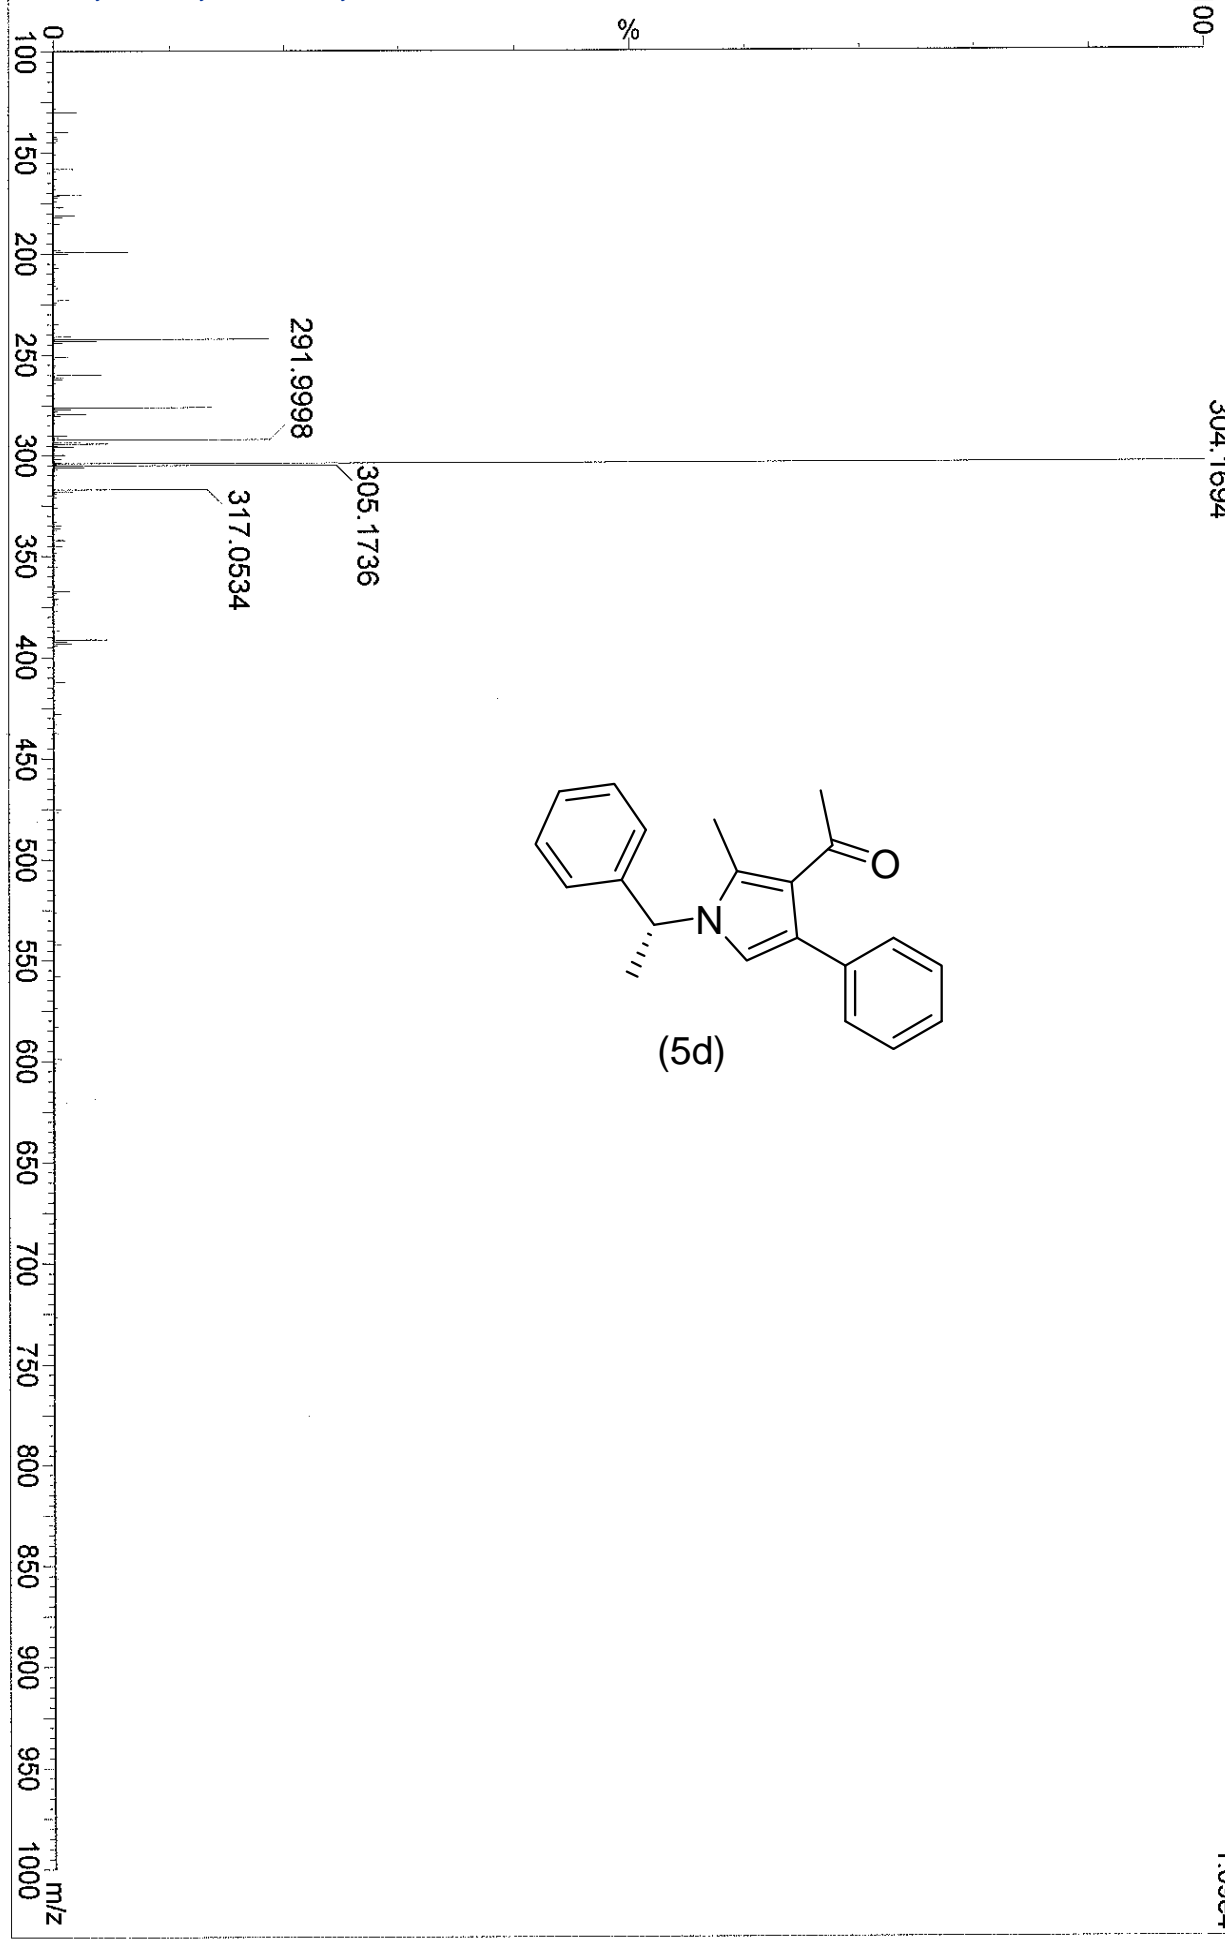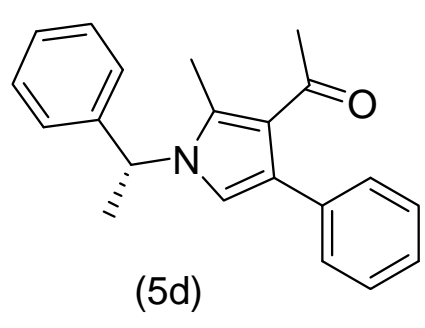



## Elemental Composition Report

### Single Mass Analysis

Tolerance = 5.0 PPM / DBE: min = 0.0, max = 80.0  
Element prediction: Off  
Number of isotope peaks used for i-FIT = 4

Monoisotopic Mass, Even Electron Ions  
127 formula(e) evaluated with 1 results within limits (up to 4 best isotopic matches for each mass)

Elements Used:  
C: 0-35 H: 0-55 N: 0-4 O: 0-6  
A009-CPFC-1/004

UT0911\_198.22 (0.507) Cm (22:24-62:71x0.010)

1: TOF MS ES+  
1.09e+004

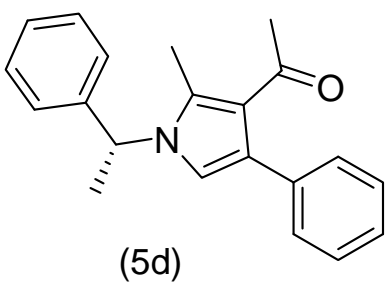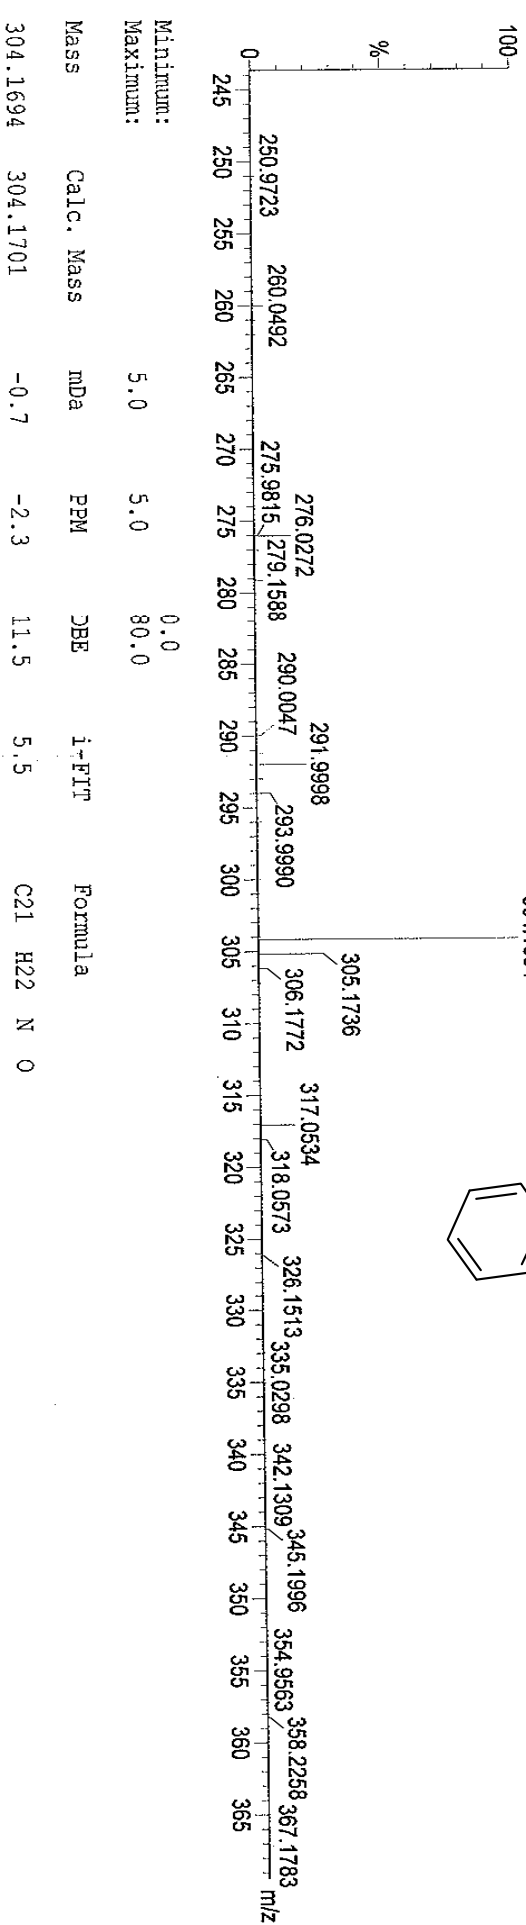

Minimum: 0.0  
Maximum: 5.0

| Mass     | Calc. Mass | mDa  | PPM  | DBE  | i-FIT | Formula     |
|----------|------------|------|------|------|-------|-------------|
| 304.1694 | 304.1701   | -0.7 | -2.3 | 11.5 | 5.5   | C21 H22 N O |

A009/CPFC-3/005 .in CDCl3  
NMR-400

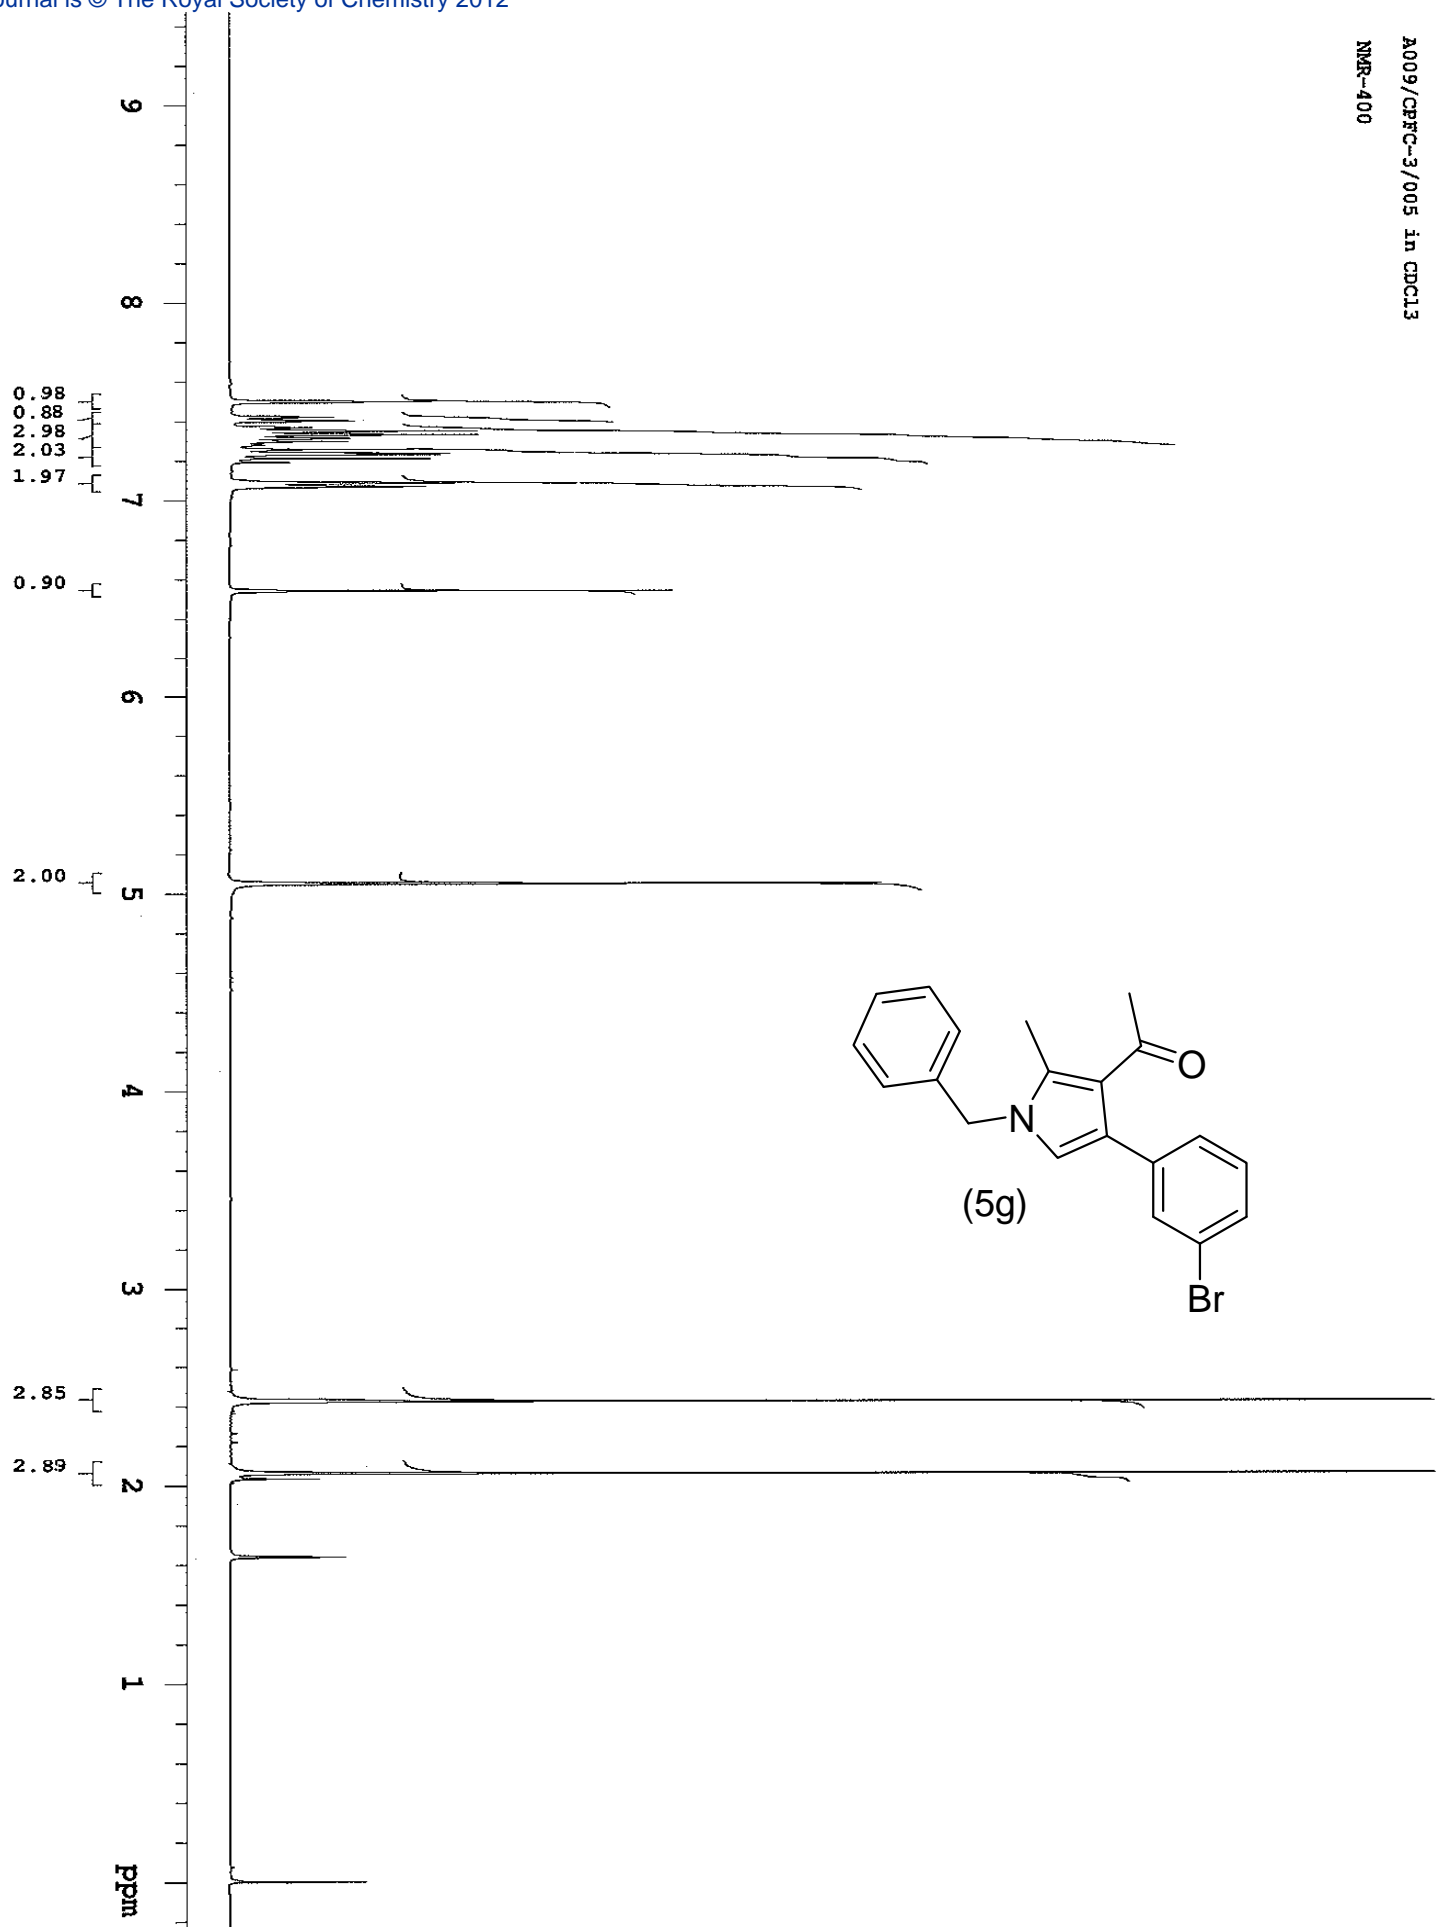

A009/CPFC-3/005 in CDCl<sub>3</sub>  
NMR-400

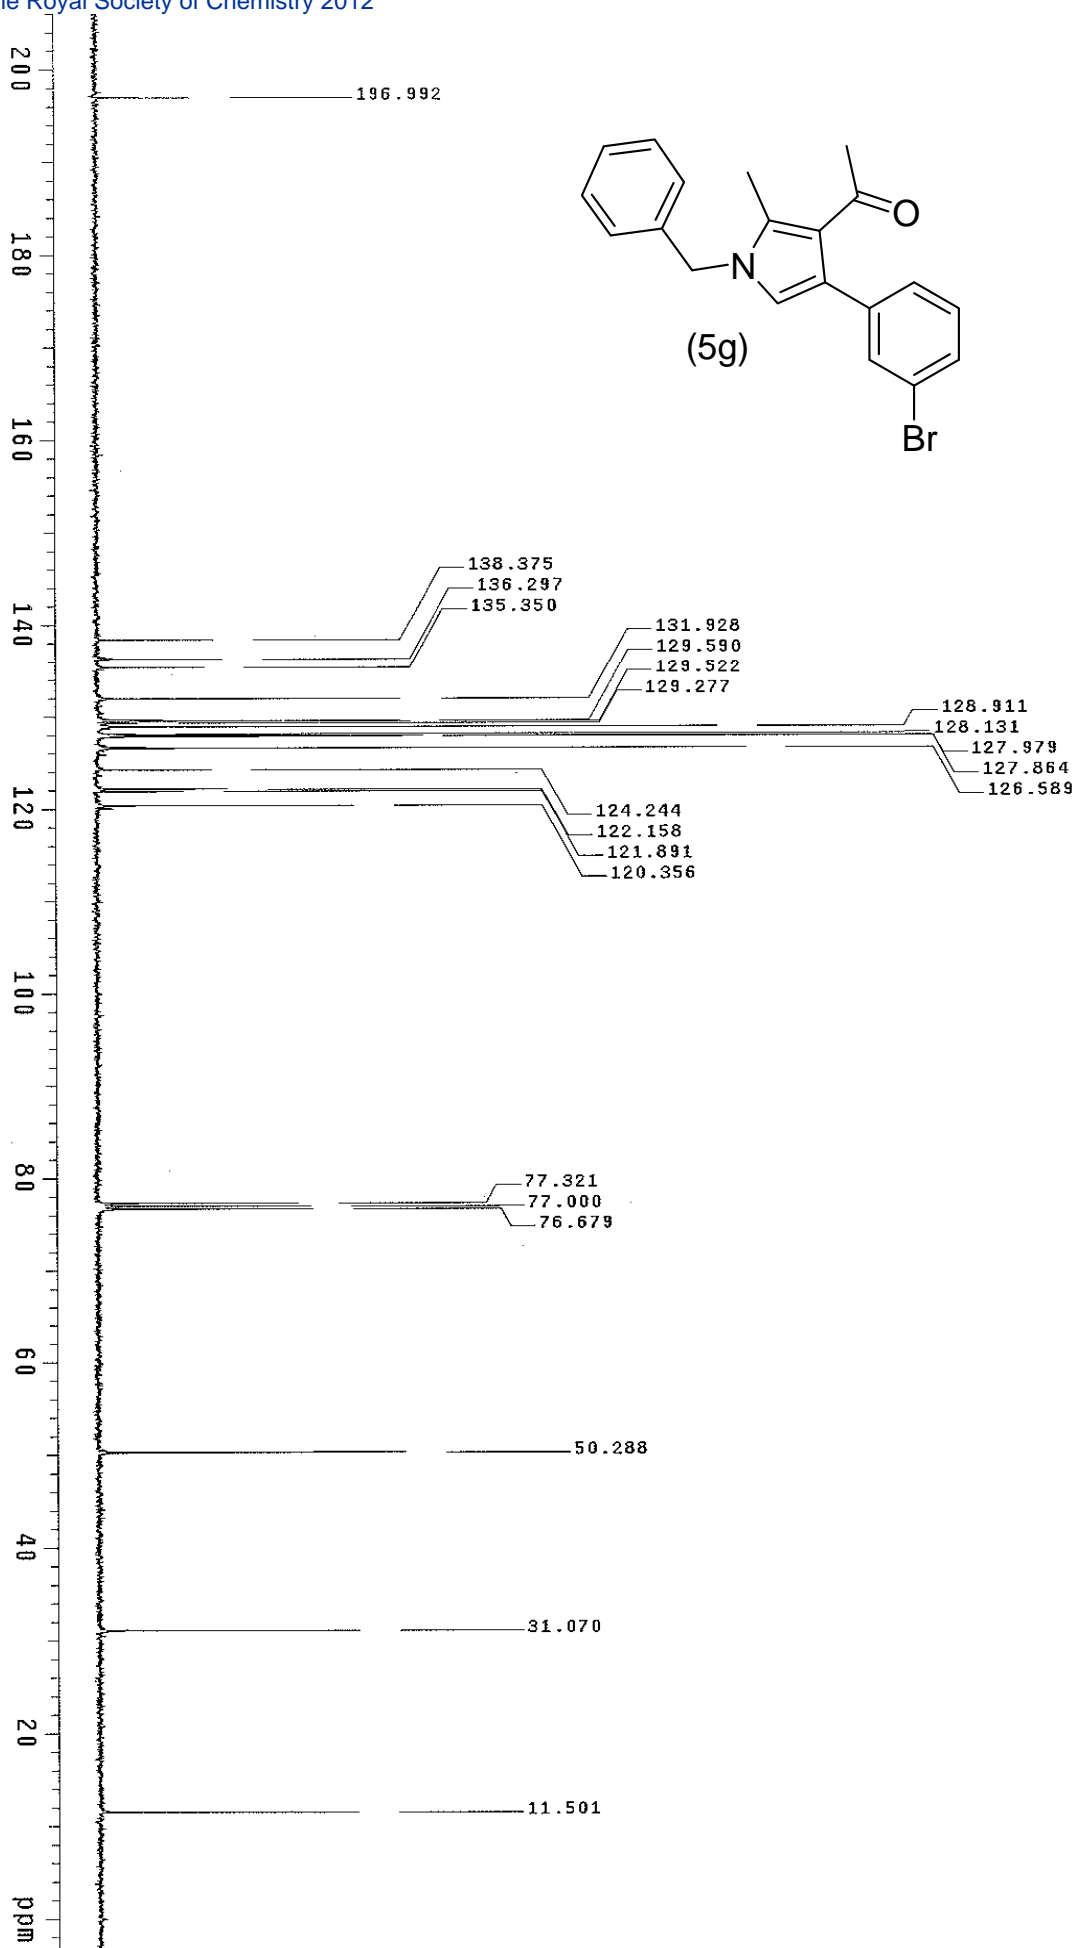

A009/CPFC-3/005

UT0911\_114.21 (0.579) Cm (21:23-53:58x0.010)  
370.0630

1: TOF MS ES+  
1.33e4

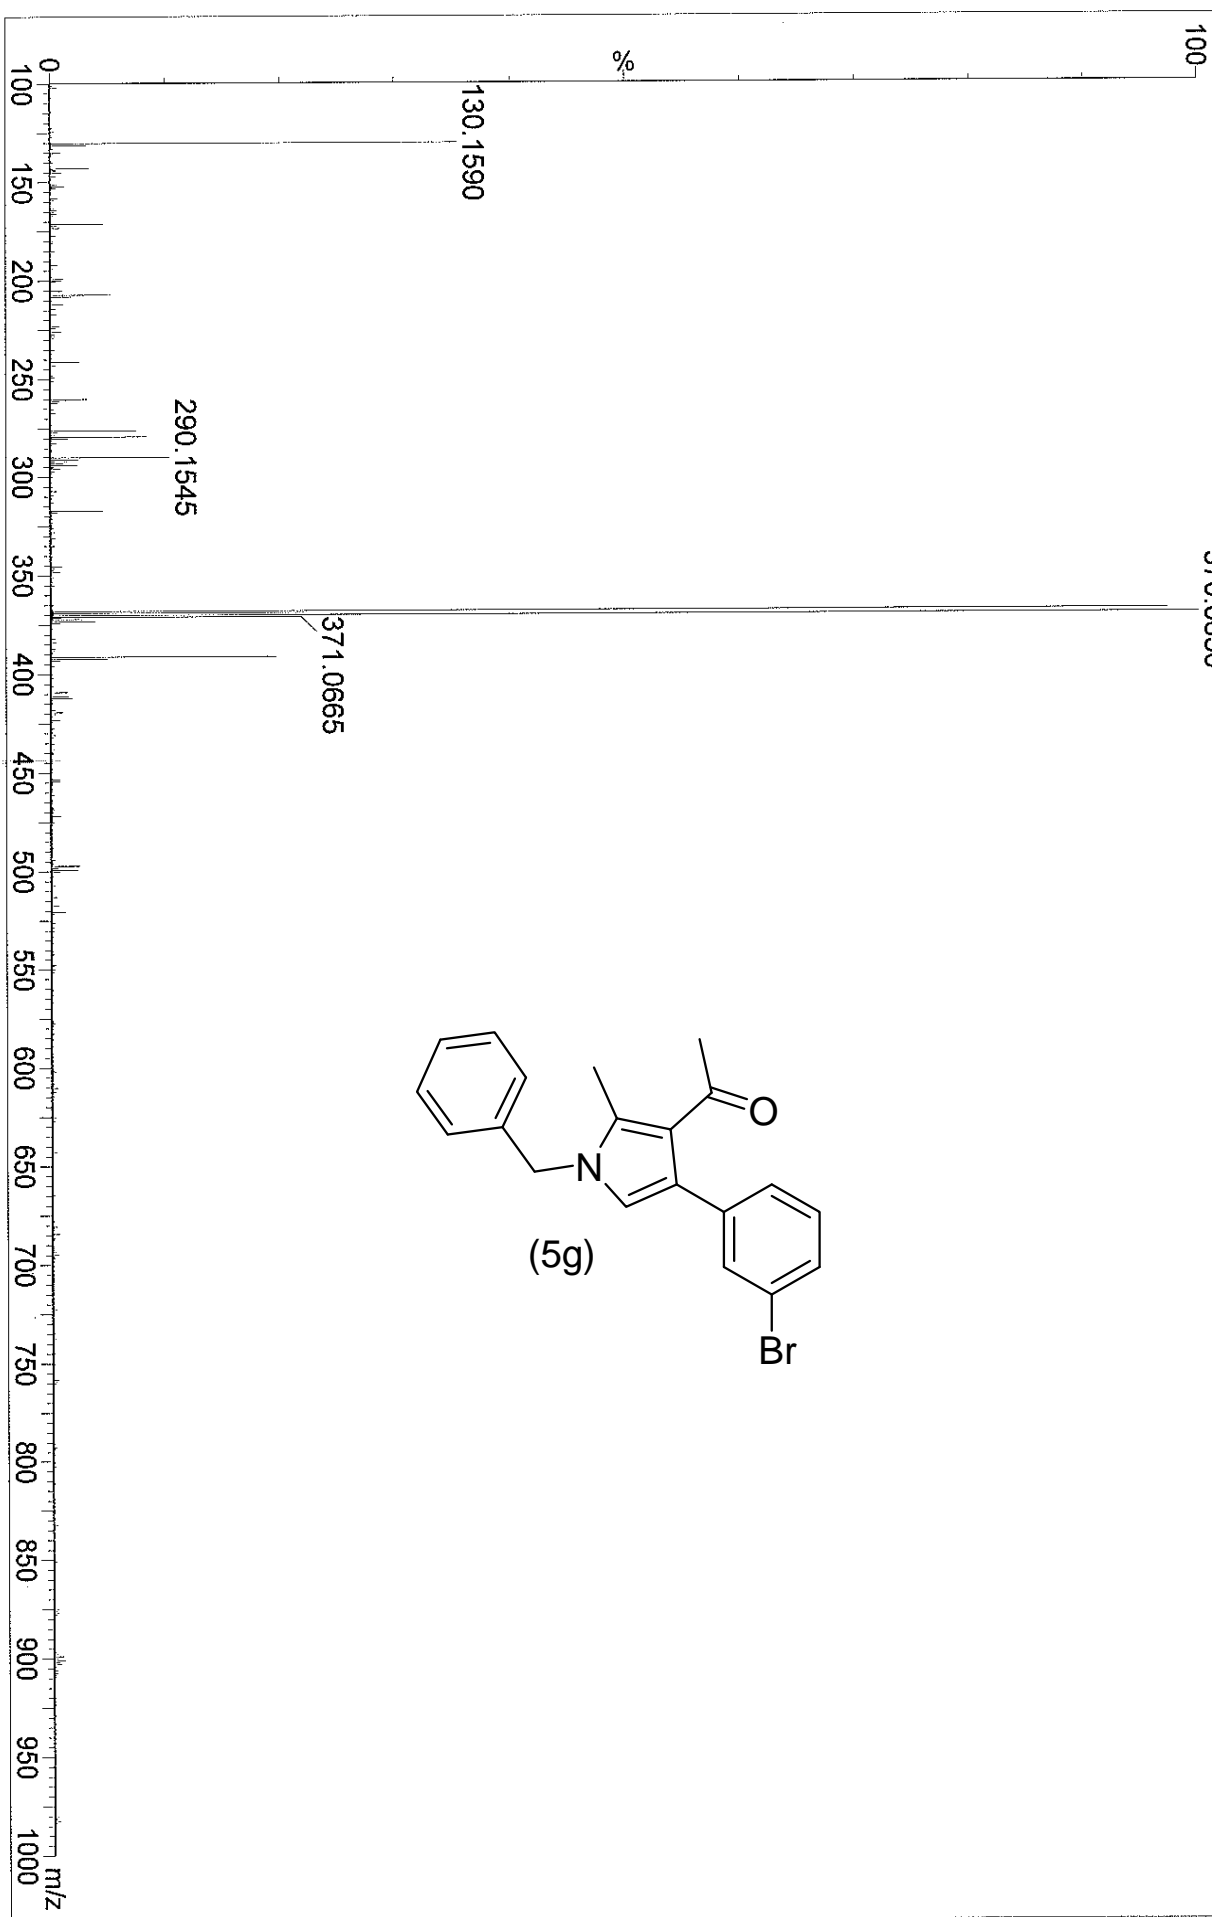

# Elemental Composition Report

## Single Mass Analysis

Tolerance = 5.0 PPM / DBE: min = 0.0, max = 80.0

Element prediction: Off

Number of isotope peaks used for i-FIT = 3

Monoisotopic Mass, Even Electron Ions

315 formula(e) evaluated with 1 results within limits (up to 4 best isotopic matches for each mass)

Elements Used:

C: 0-50 H: 0-65 N: 0-5 O: 0-4 Br: 0-2

A009/CPFC-3/005

UT0911\_114 21 (0.579) Cm (21:23-53:58x0.010)

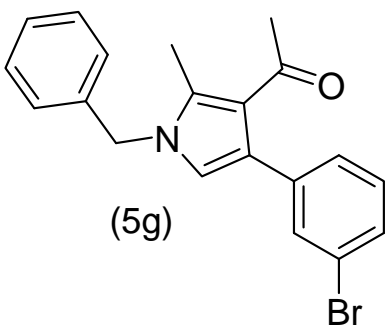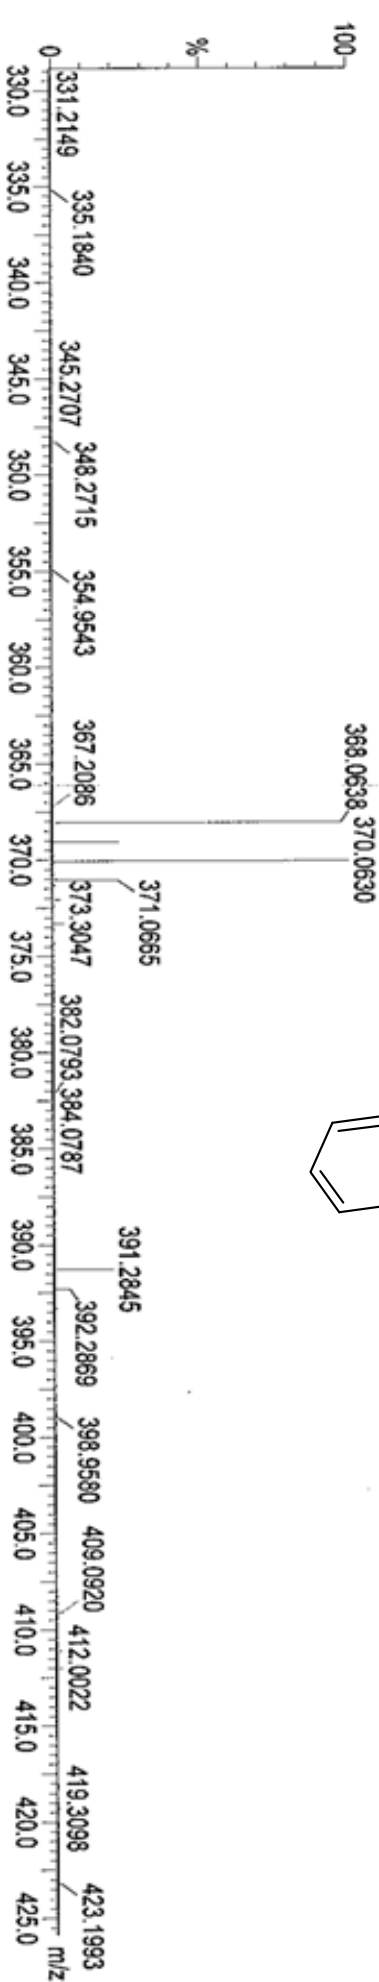

1: TOF MS ES+  
1.33e+004

Minimum: 0.0  
Maximum: 5.0 5.0 80.0

| Mass     | Calc. Mass | mDa  | PPM  | DBE  | i-FIT | Formula        |
|----------|------------|------|------|------|-------|----------------|
| 368.0638 | 368.0650   | -1.2 | -3.3 | 11.5 | 3.4   | C20 H19 N O Br |

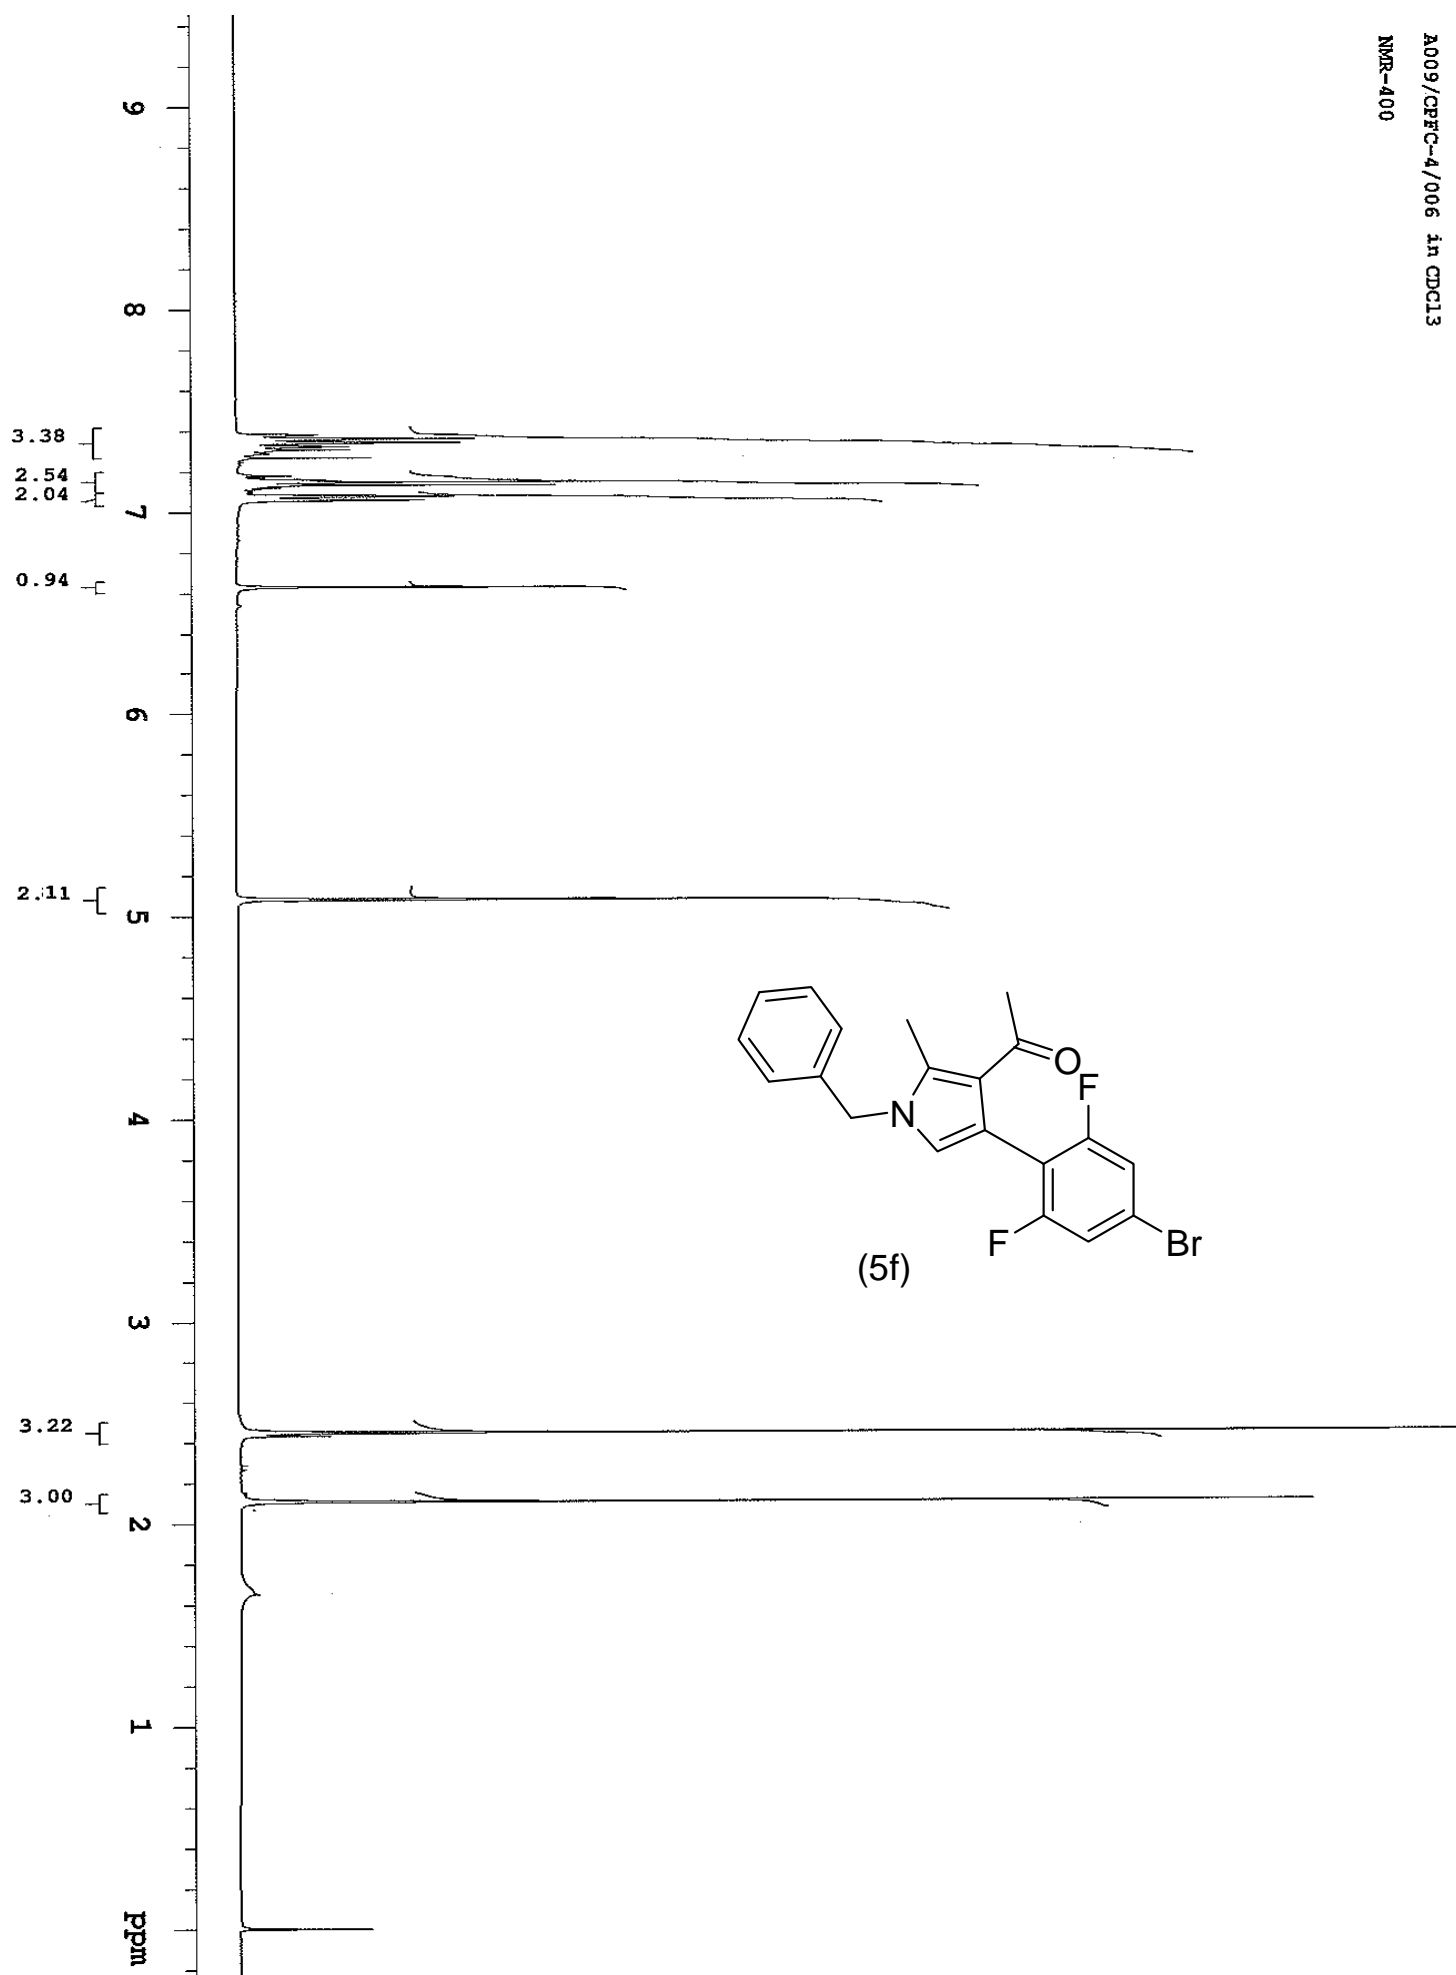

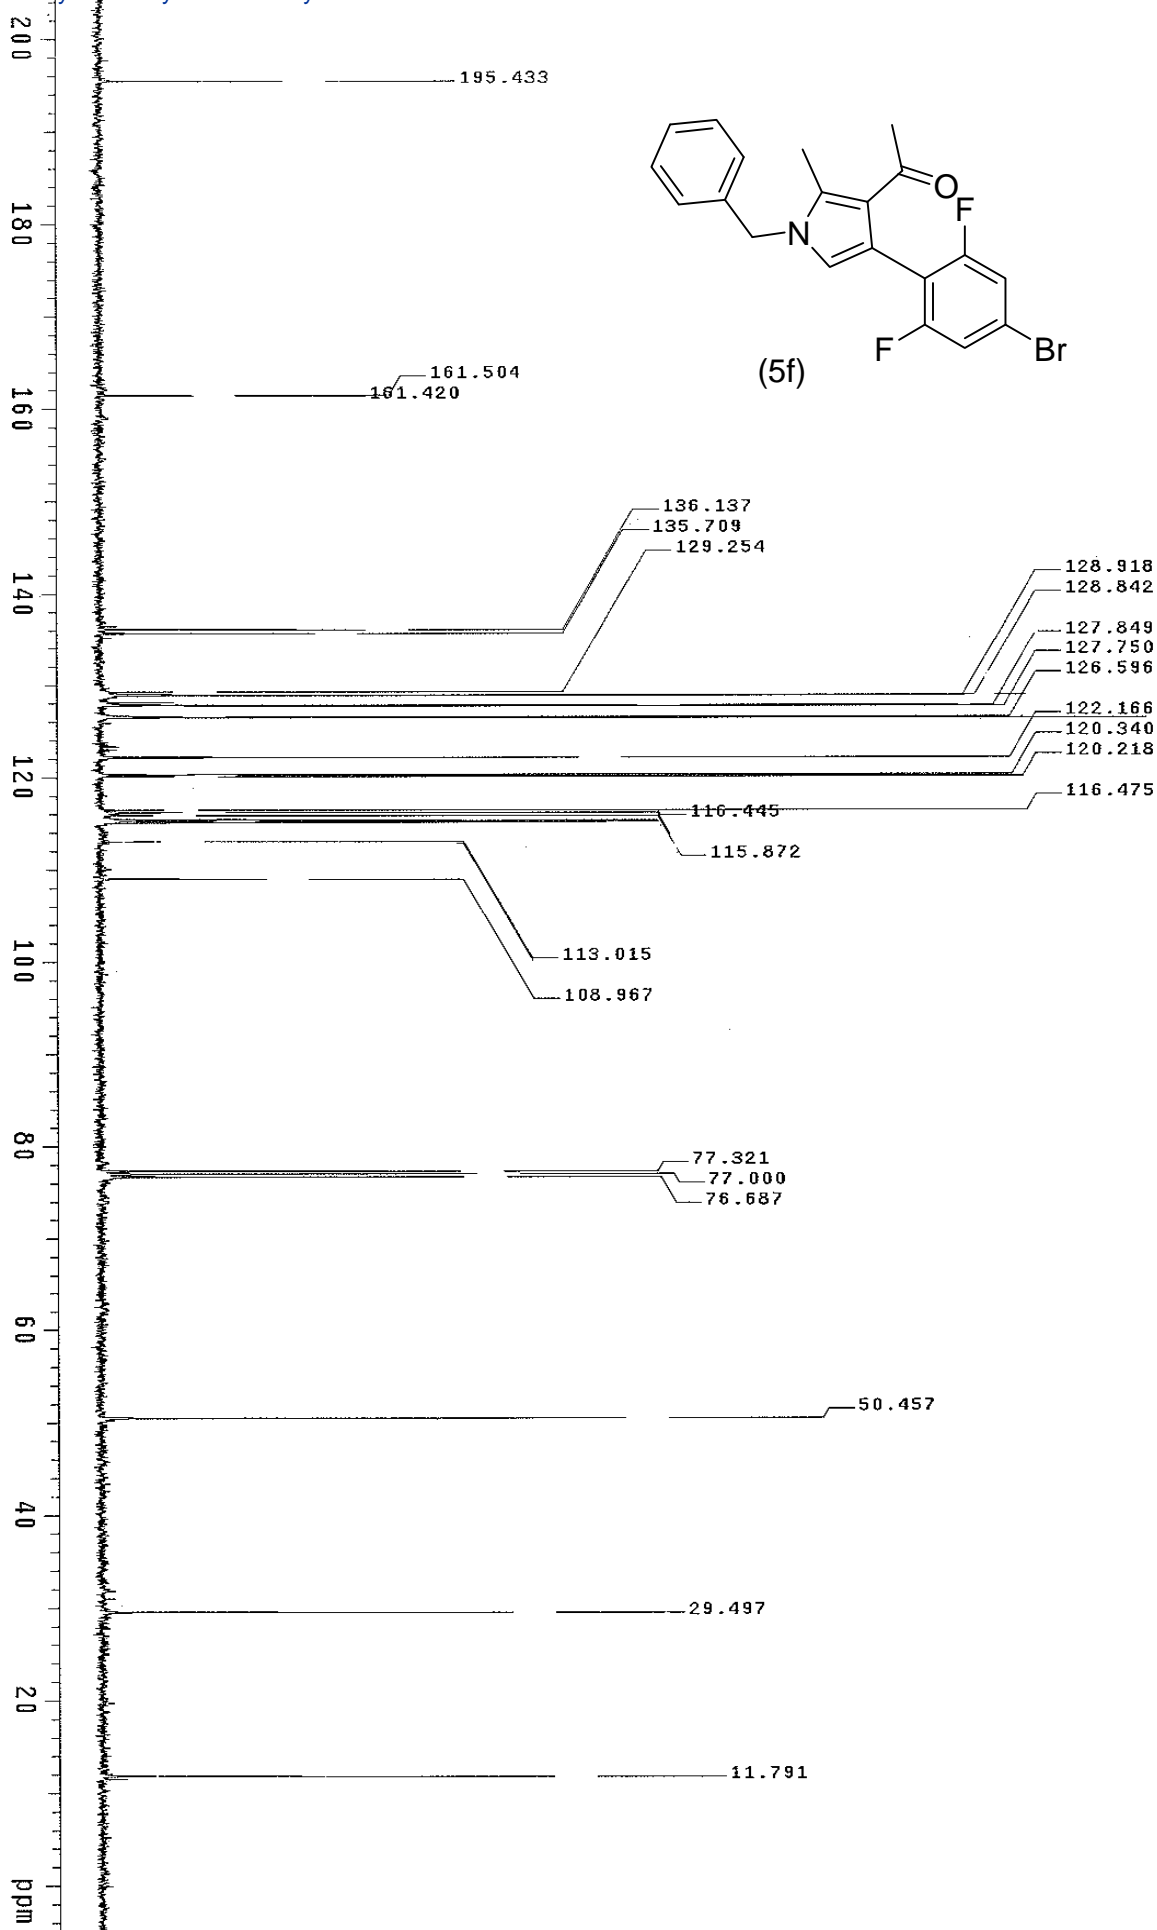

A009/CPFC-4-006

UT0911\_121 18 (0.492) Cm (18:22-55:61x0.010)

404.0461

1: TOF MS ES+  
9.80e3

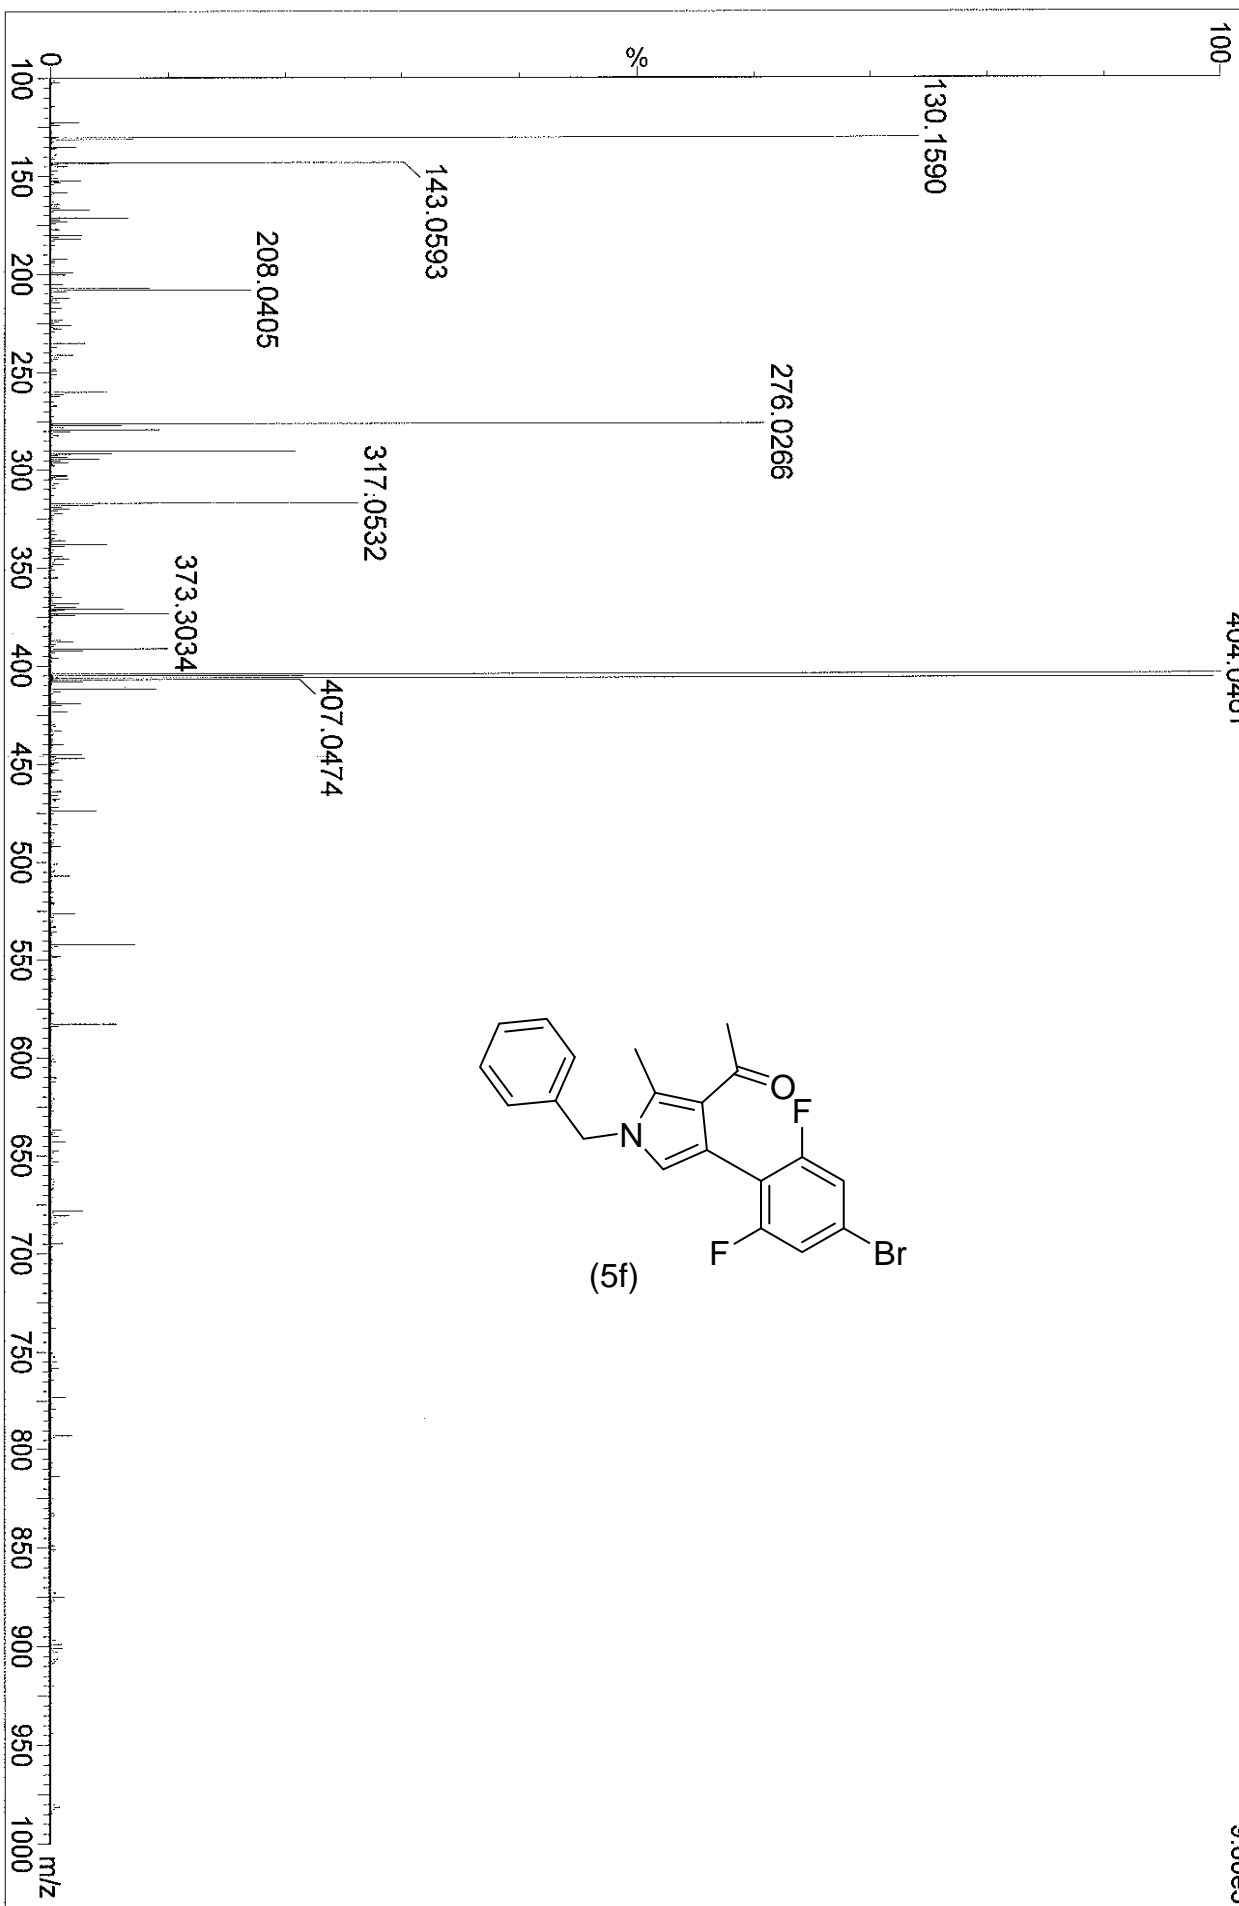



# Elemental Composition Report

## Single Mass Analysis

Tolerance = 5.0 PPM / DBE: min = 0.0, max = 80.0

Element prediction: Off

Number of isotope peaks used for i-FIT = 3

Monoisotopic Mass, Even Electron Ions

390 formula(e) evaluated with 2 results within limits (up to 4 best isotopic matches for each mass)

Elements Used:

C: 0-50 H: 0-65 N: 0-2 O: 0-4 F: 0-2 Br: 0-1

A009/CPFC-4-006

UT0911\_121 18 (0.492) Cm (18:22-55:61x0.010)

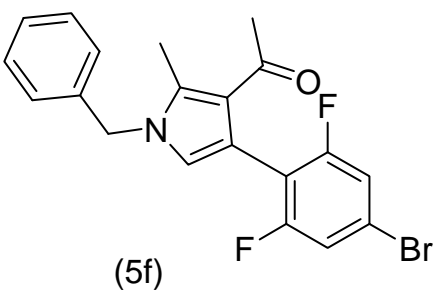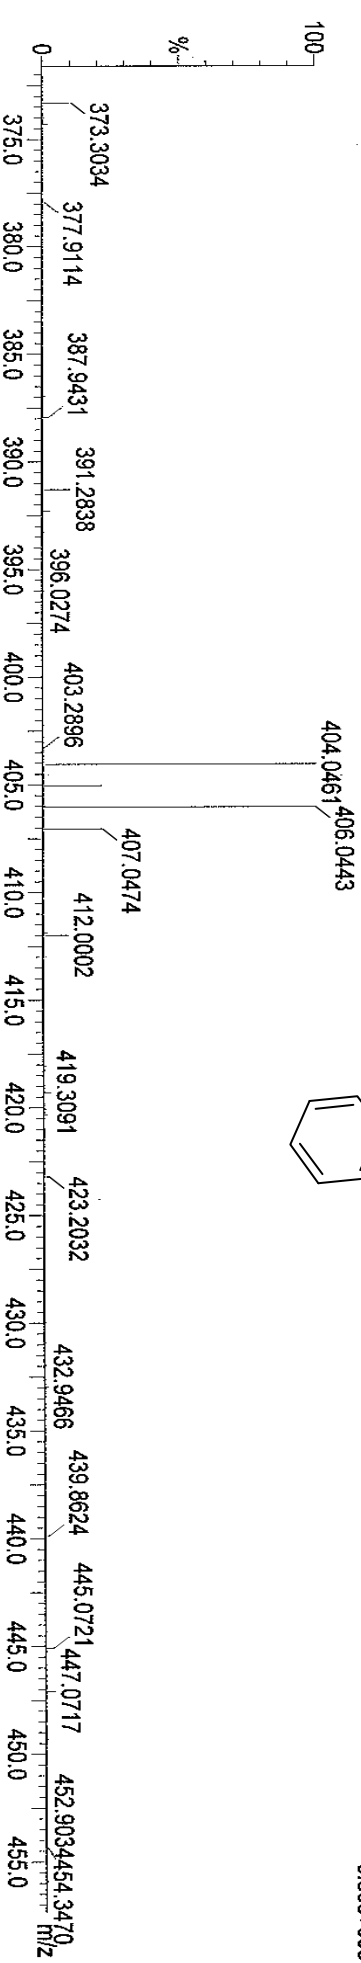

Minimum: 0.0  
Maximum: 5.0

| Mass     | Calc. Mass | mDa  | PPM  | DBE  | i-FIT | Formula           |
|----------|------------|------|------|------|-------|-------------------|
| 404.0461 | 404.0462   | -0.1 | -0.2 | 11.5 | 3.2   | C20 H17 N O F2 Br |

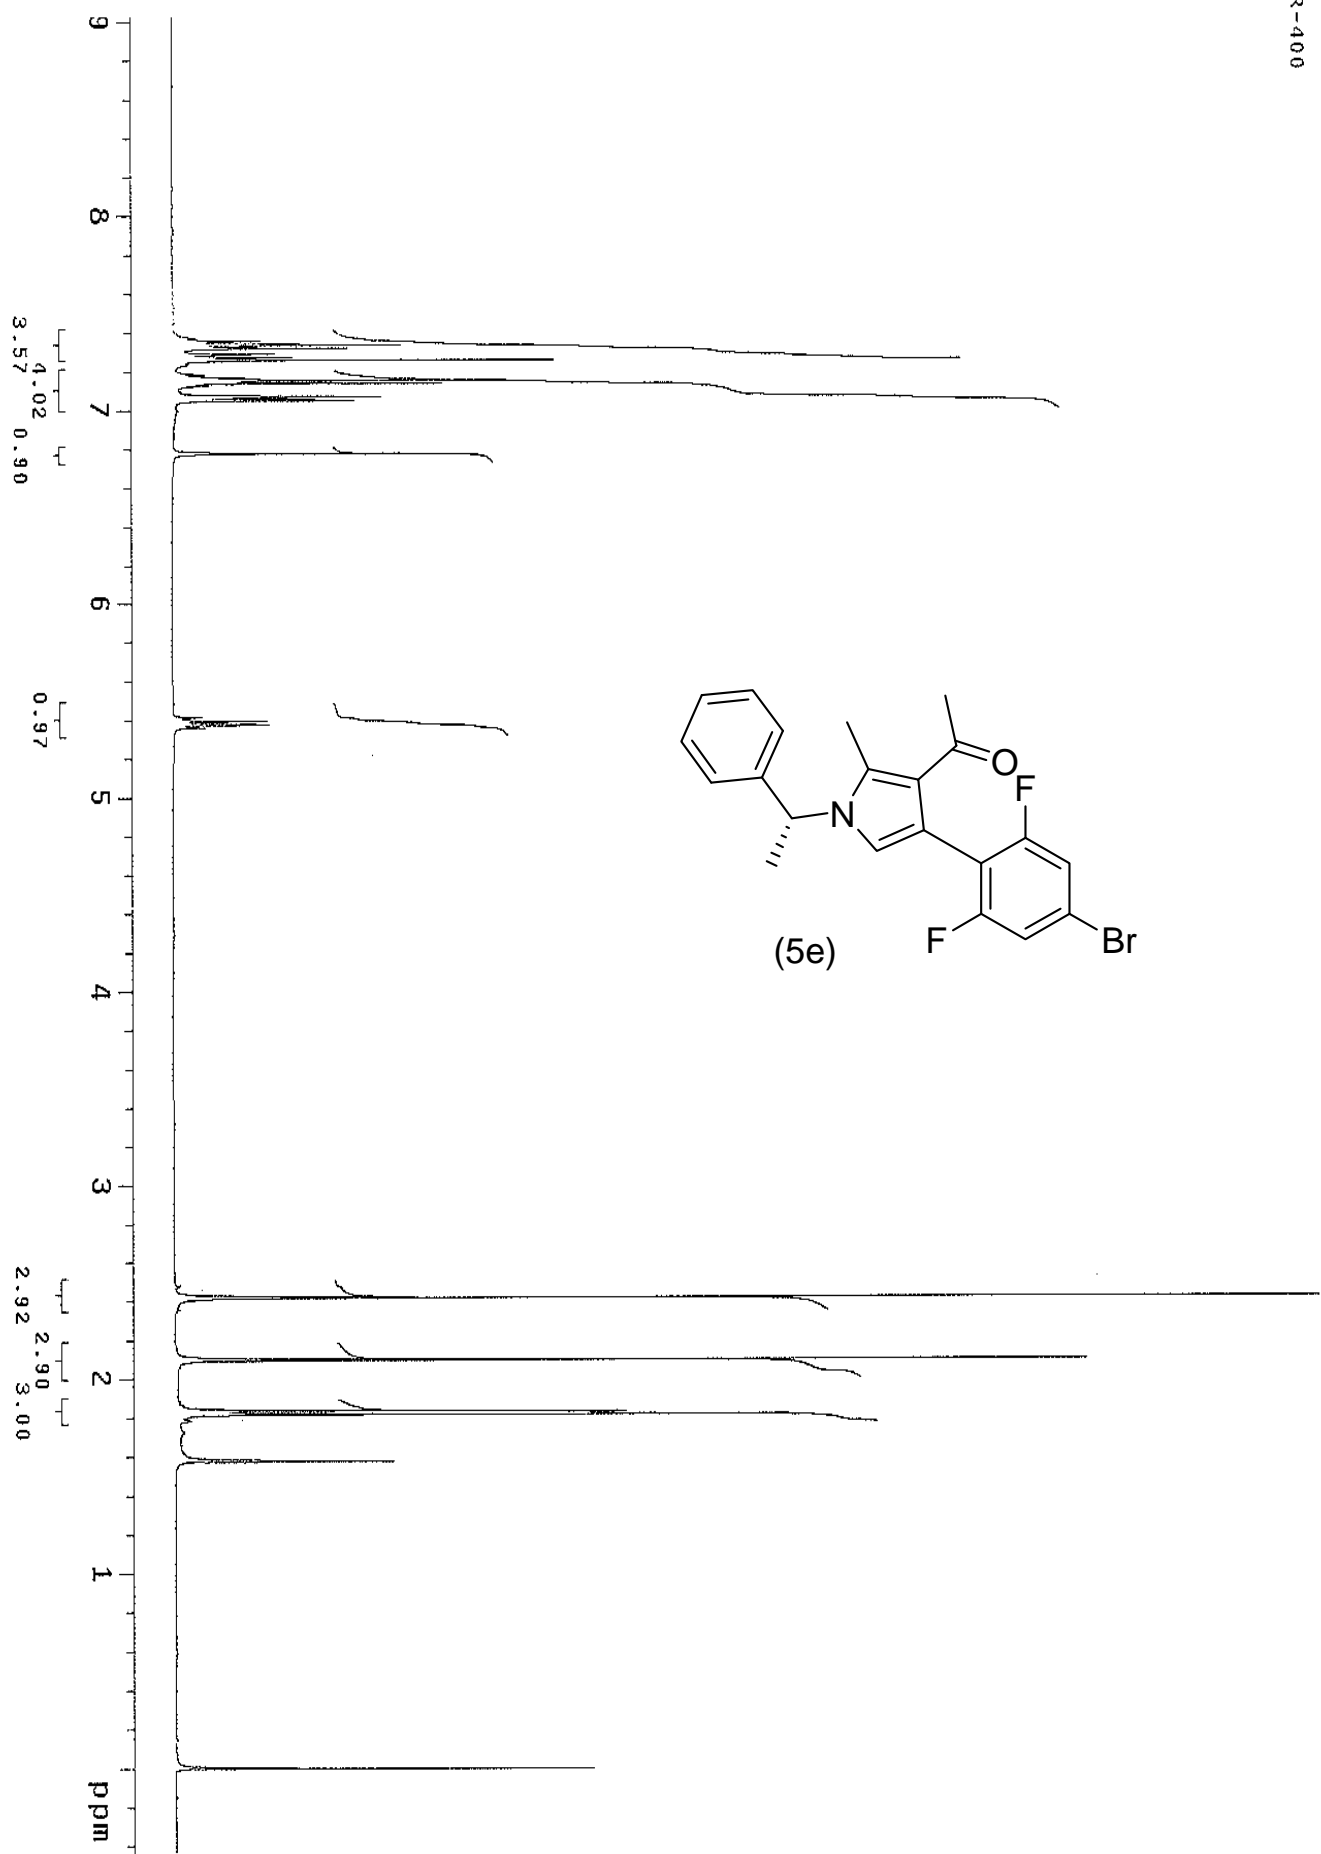

A009/CPFC-4/007 in CDCl<sub>3</sub>  
NMR-400

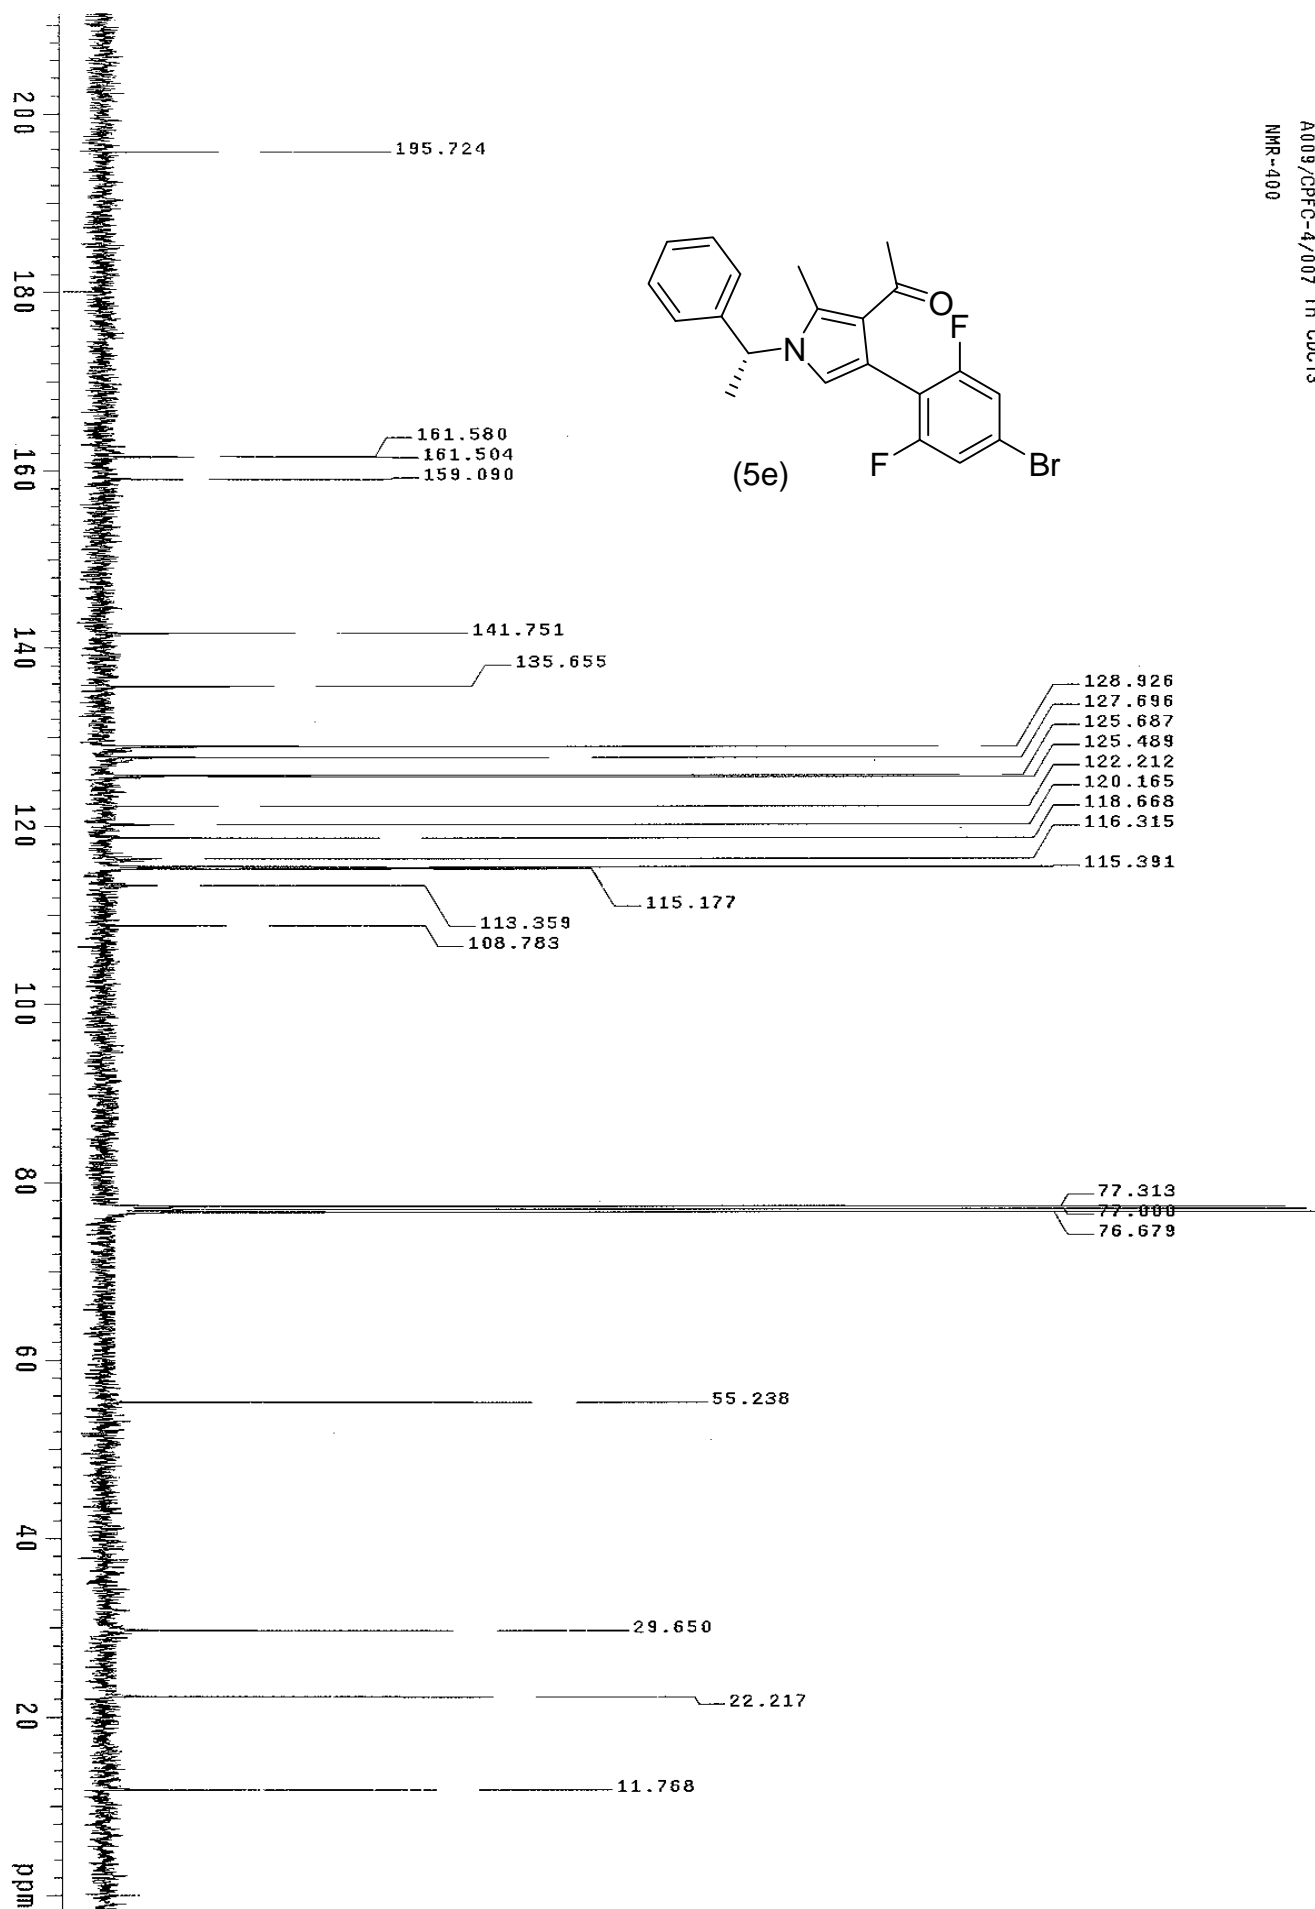

A009-CPFC-1/007

UT0911\_199.28 (0.631) Cm (27.29-65.75x0.010)

242.2847

1: TOF MS ES+  
2.07e3

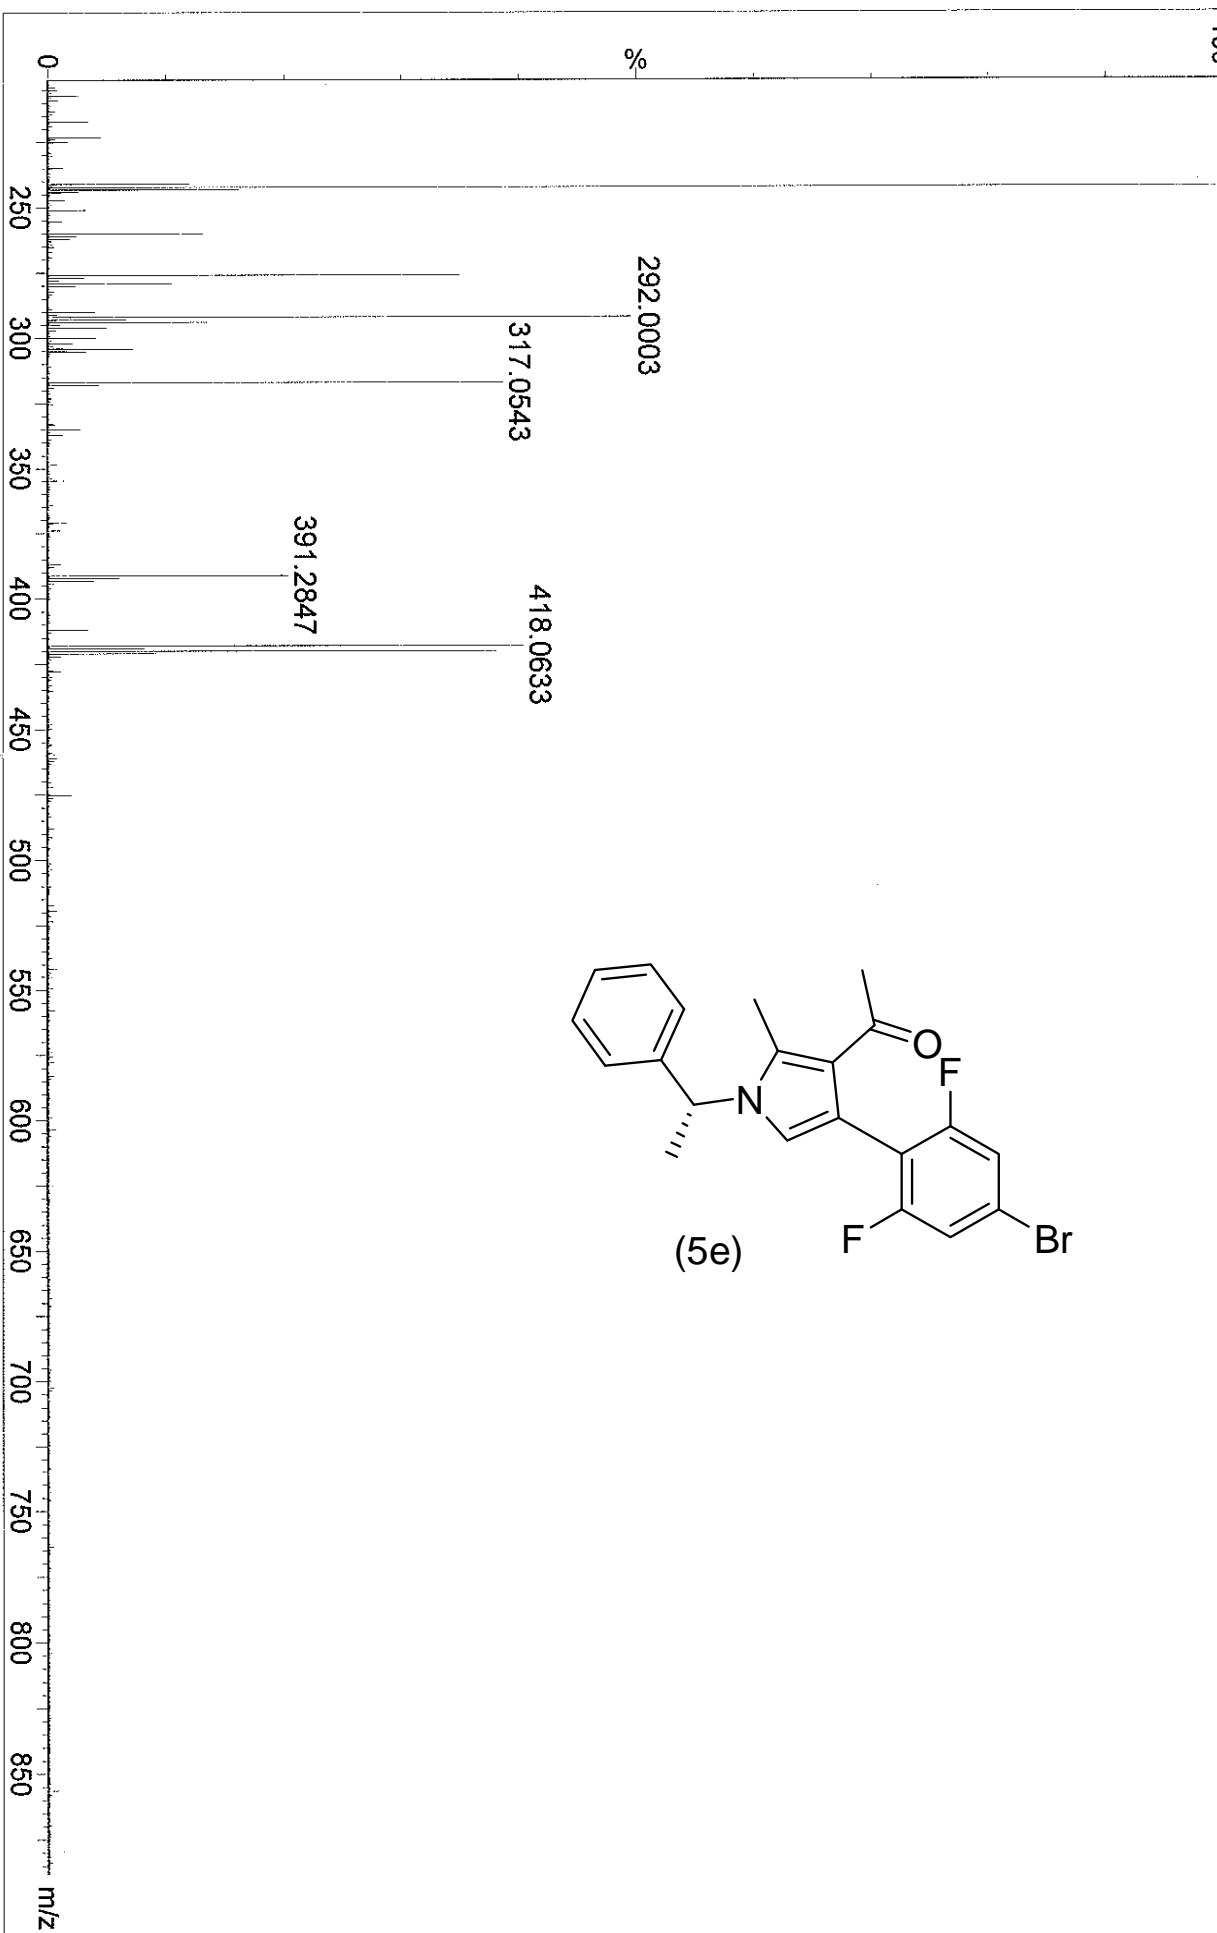

# Elemental Composition Report

## Single Mass Analysis

Tolerance = 5.0 PPM / DBE: min = 0.0, max = 80.0

Element prediction: Off

Number of isotope peaks used for i-FIT = 4

Monoisotopic Mass, Even Electron Ions

274 formula(e) evaluated with 2 results within limits (up to 4 best isotopic matches for each mass)

Elements Used:

C: 0-35 H: 0-55 N: 0-4 O: 0-6 Br: 0-1 F: 2-2

A009-CPFC-1/007

UT0911\_199.28 (0.631) Cm (27:29-65:75x0.010)

1: TOF MS ES+  
8.36e+002

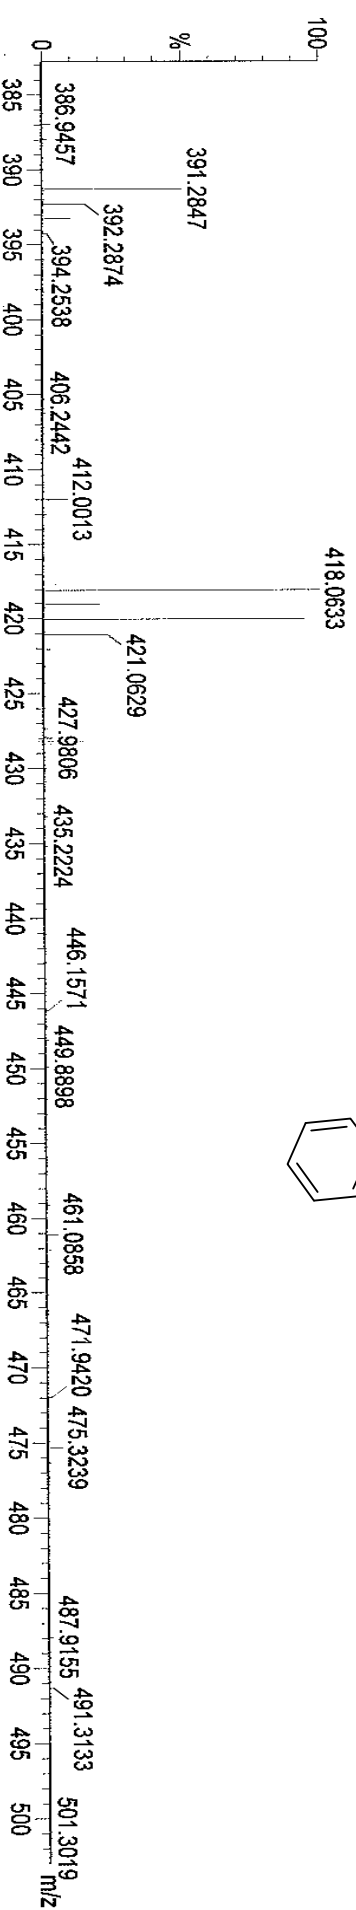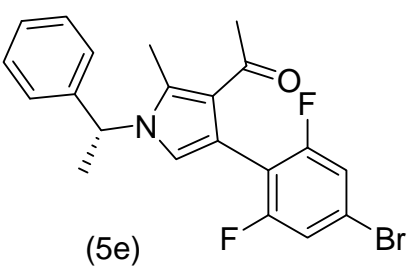

| Mass     | Calc. Mass | mDa | PPM | DBE  | i-FIT | Formula           |
|----------|------------|-----|-----|------|-------|-------------------|
| 418.0633 | 418.0618   | 1.5 | 3.6 | 11.5 | 2.3   | C21 H19 N O Br F2 |

Minimum: 0.0  
Maximum: 5.0

0.90  
0.82  
2.98  
2.03  
1.77

0.90

2.00

2.99

2.90

8  
7  
6  
5  
4  
3  
2  
1  
ppm

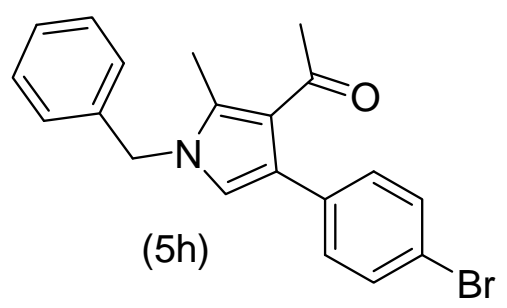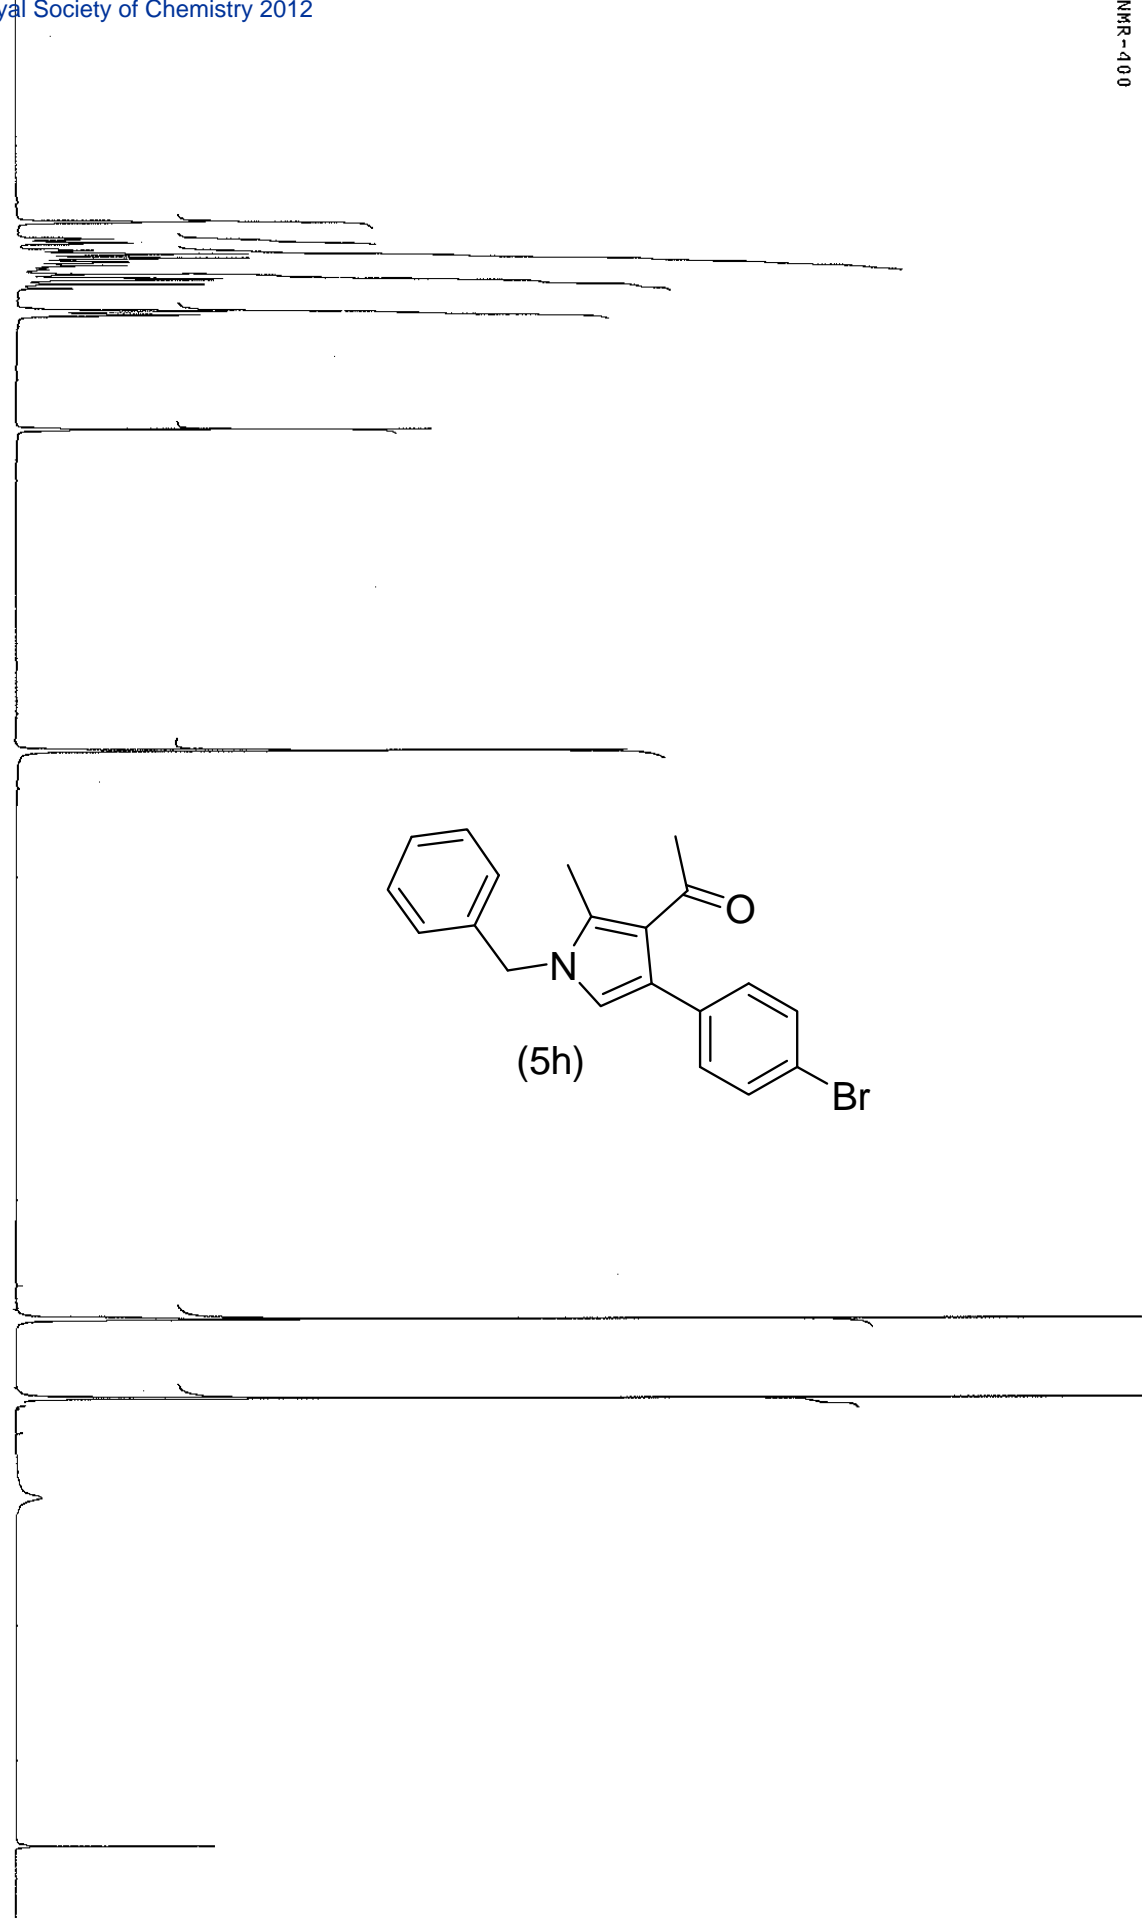

A009-CF-C-4-009 in CDCl<sub>3</sub>  
NMR-400

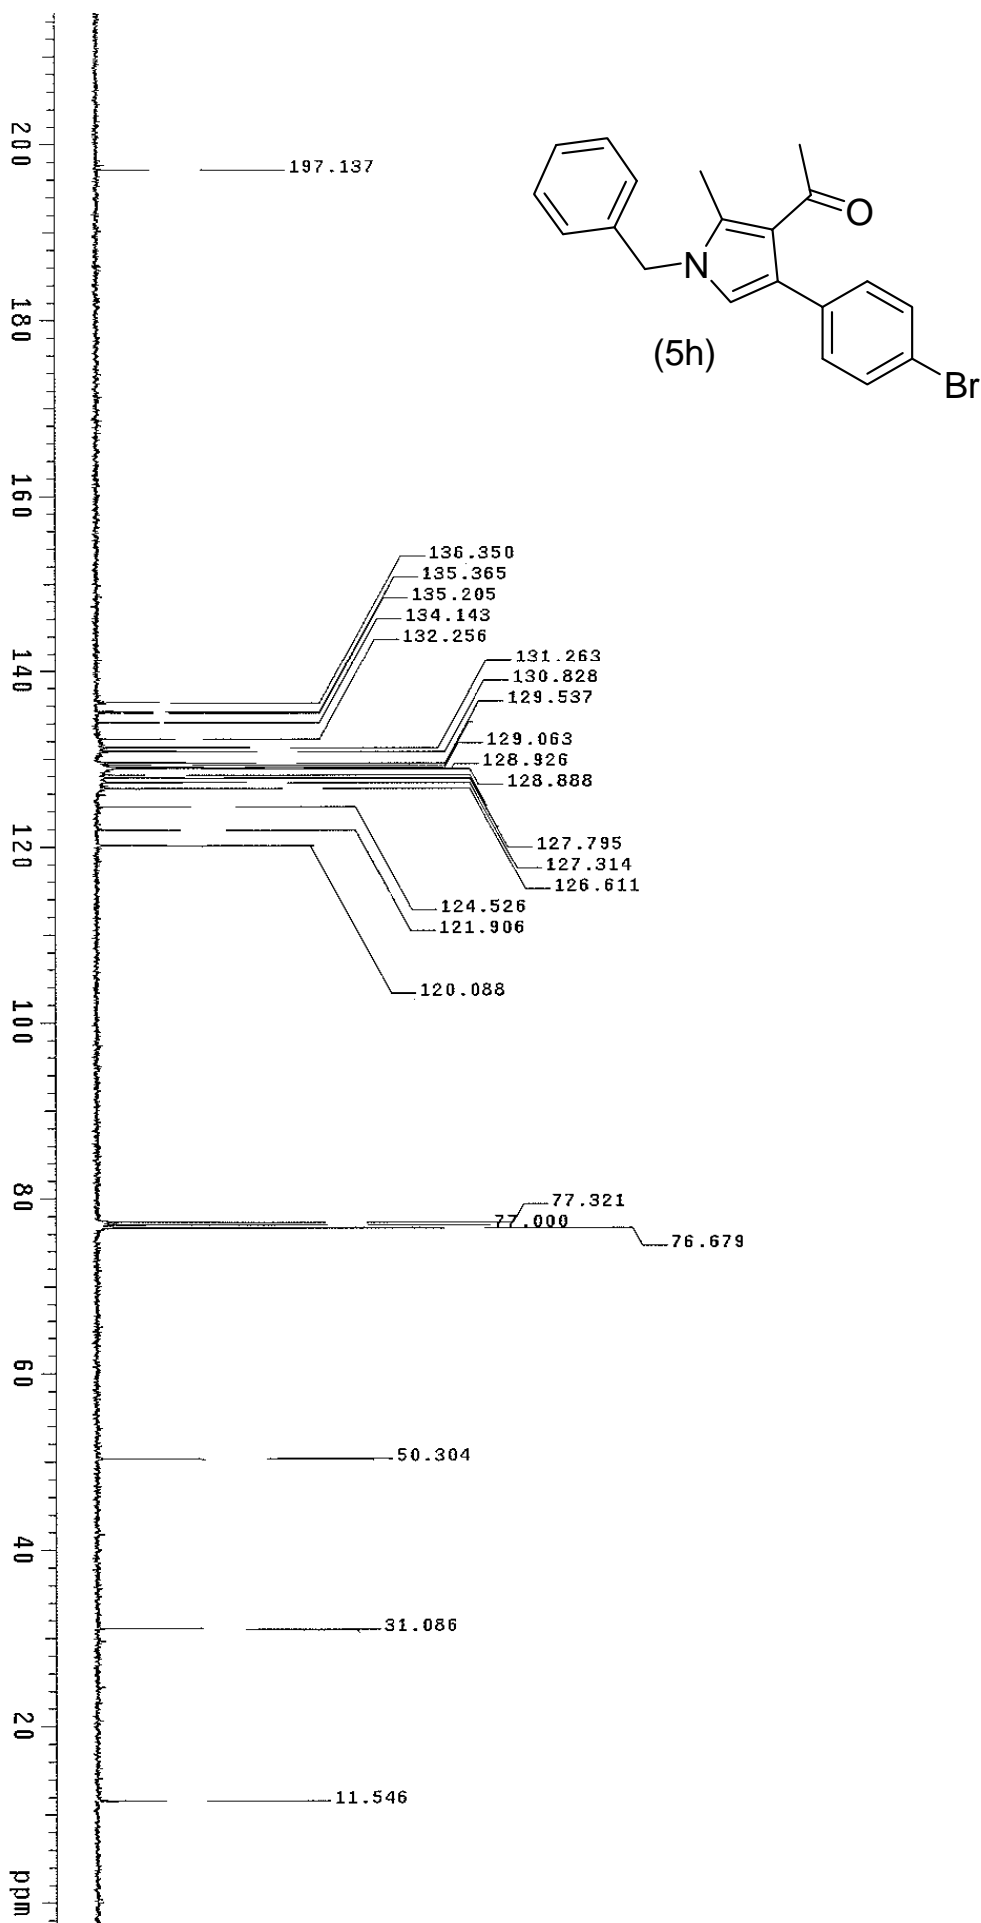

A009-CPFC-1/009

UT0911\_200 24 (0.541) Cm (24:27-65:81x0.010)  
242.2844

1: TOF MS ES+  
1.65e3

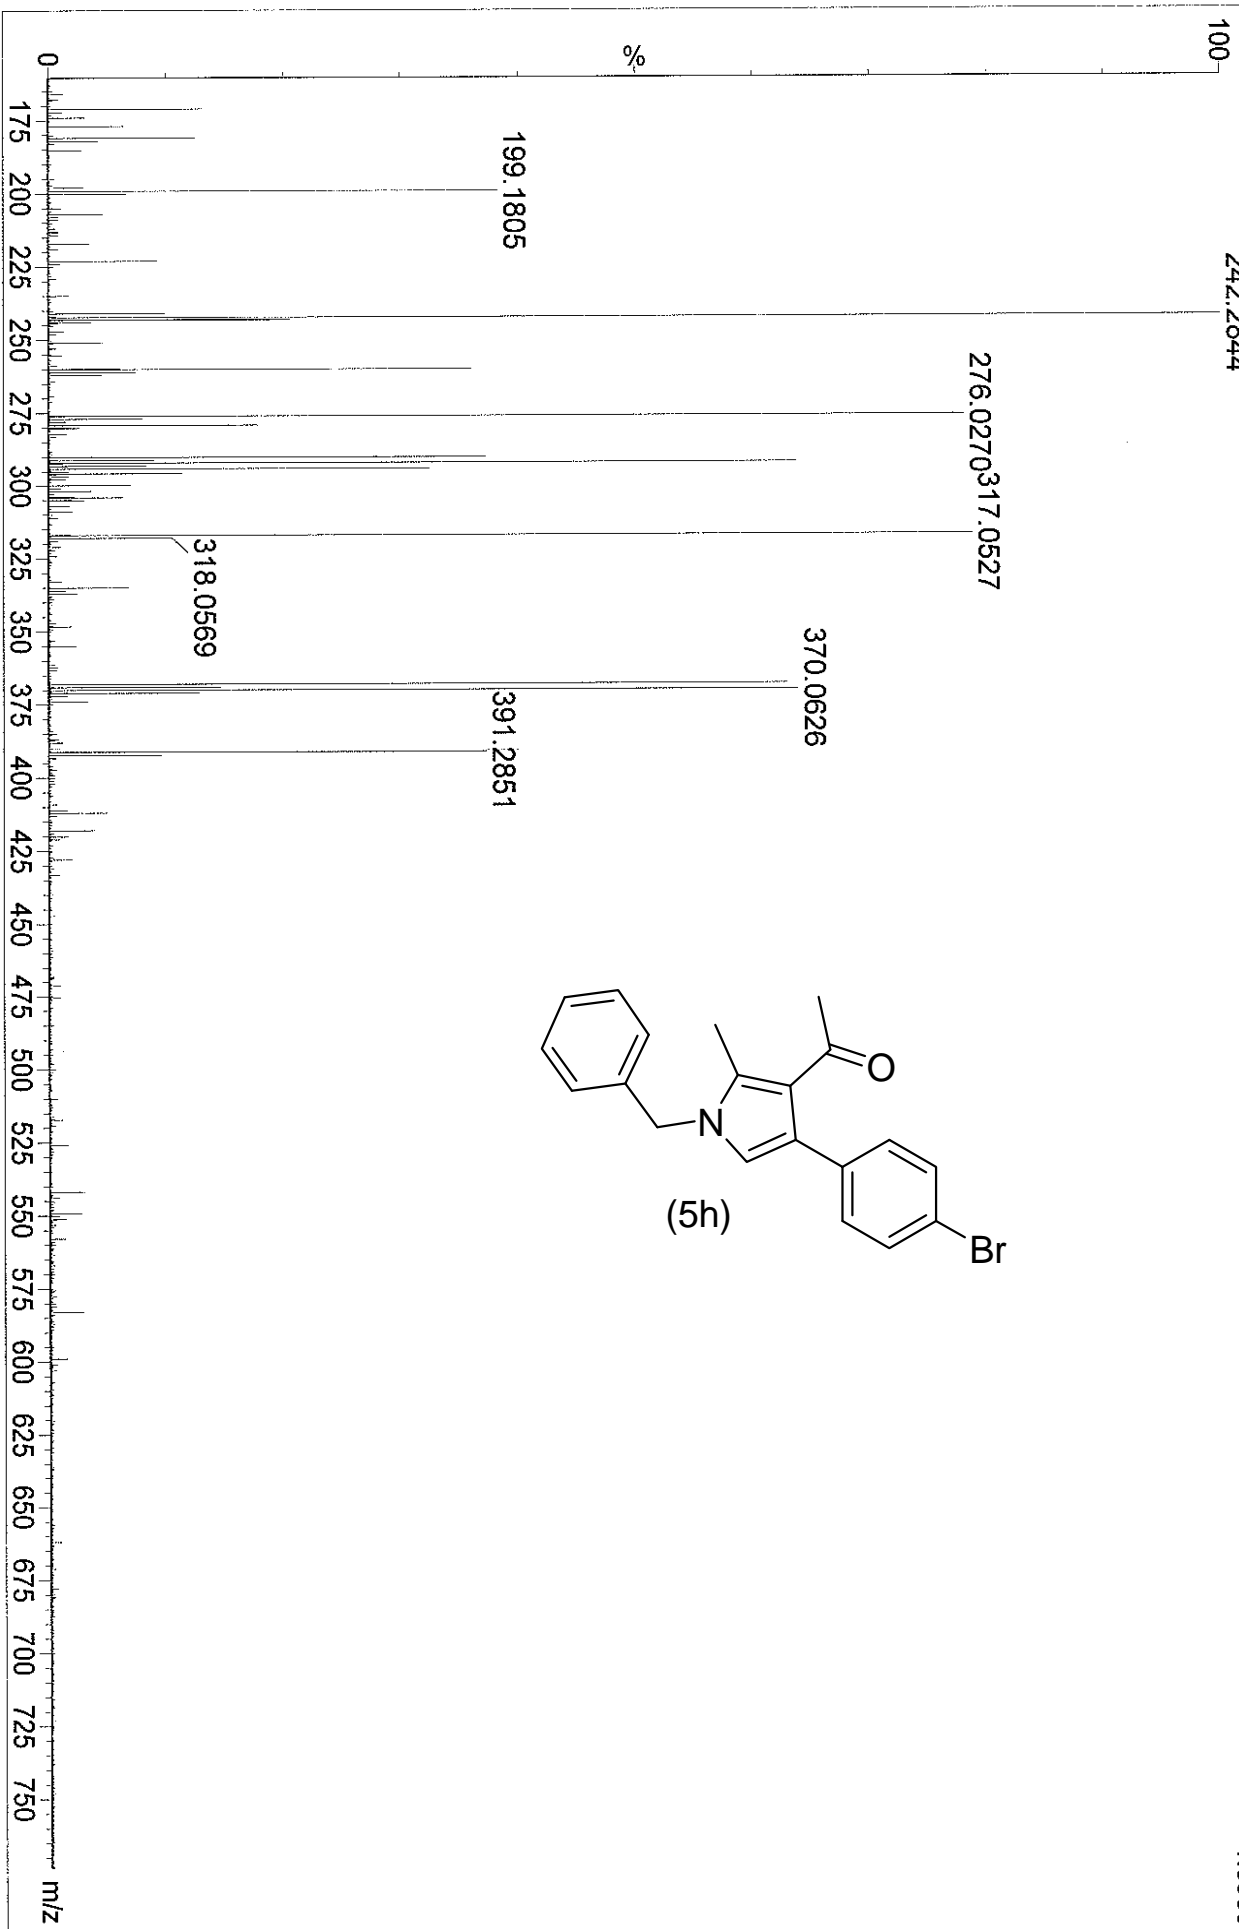



## Elemental Composition Report

### Single Mass Analysis

Tolerance = 5.0 PPM / DBE: min = 0.0, max = 80.0

Element prediction: Off

Number of isotope peaks used for i-FIT = 4

Monoisotopic Mass, Even Electron Ions

273 formula(e) evaluated with 1 results within limits (up to 4 best isotopic matches for each mass)

Elements Used:

C: 0-35 H: 0-55 N: 0-4 O: 0-6 Br: 0-1

A009-CPFC-1/009

UT0911\_200 24 (0.541) Cm (24:27-65:81x0.010)

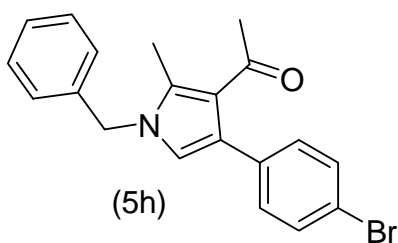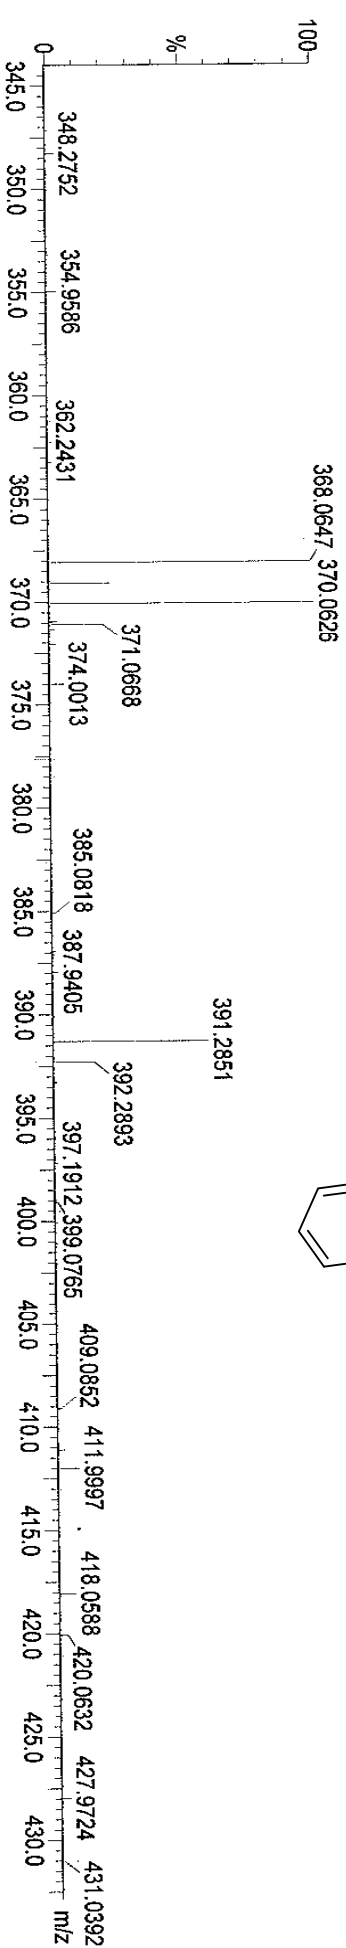

Minimum: 0.0  
Maximum: 5.0

| Mass     | Calc. Mass | mDa  | PPM  | DBE  | i-FIT | Formula        |
|----------|------------|------|------|------|-------|----------------|
| 370.0626 | 370.0650   | -0.3 | -0.8 | 11.5 | 1,4   | C20 H19 N O Br |

1: TOF MS ES+  
1.05e+003

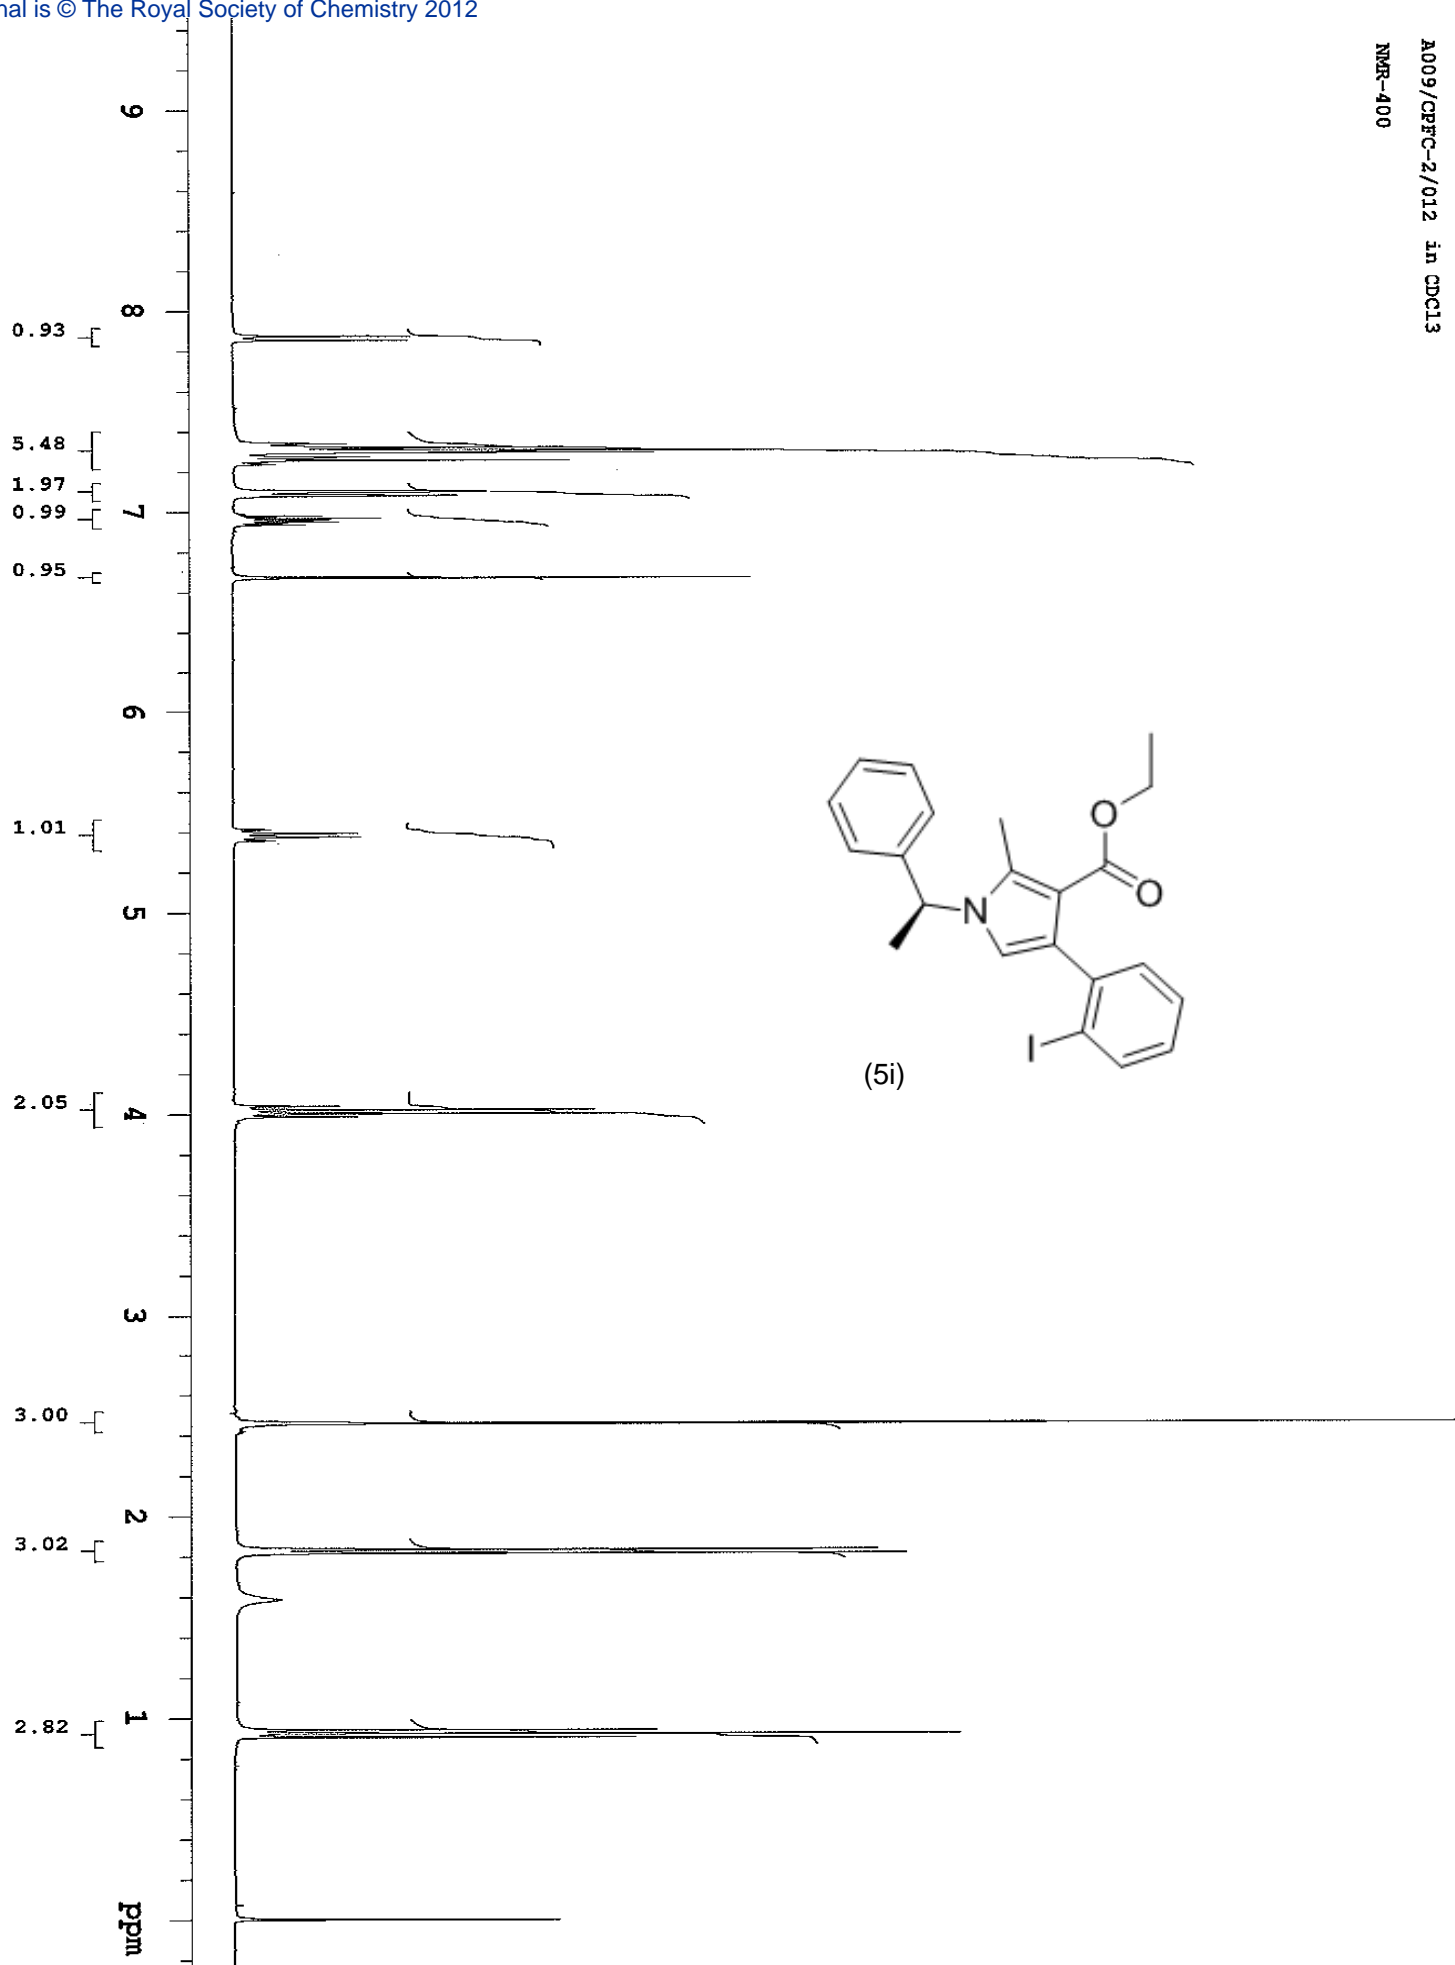

A009-CPFC-2-012 in CDCl<sub>3</sub>  
NMR-400

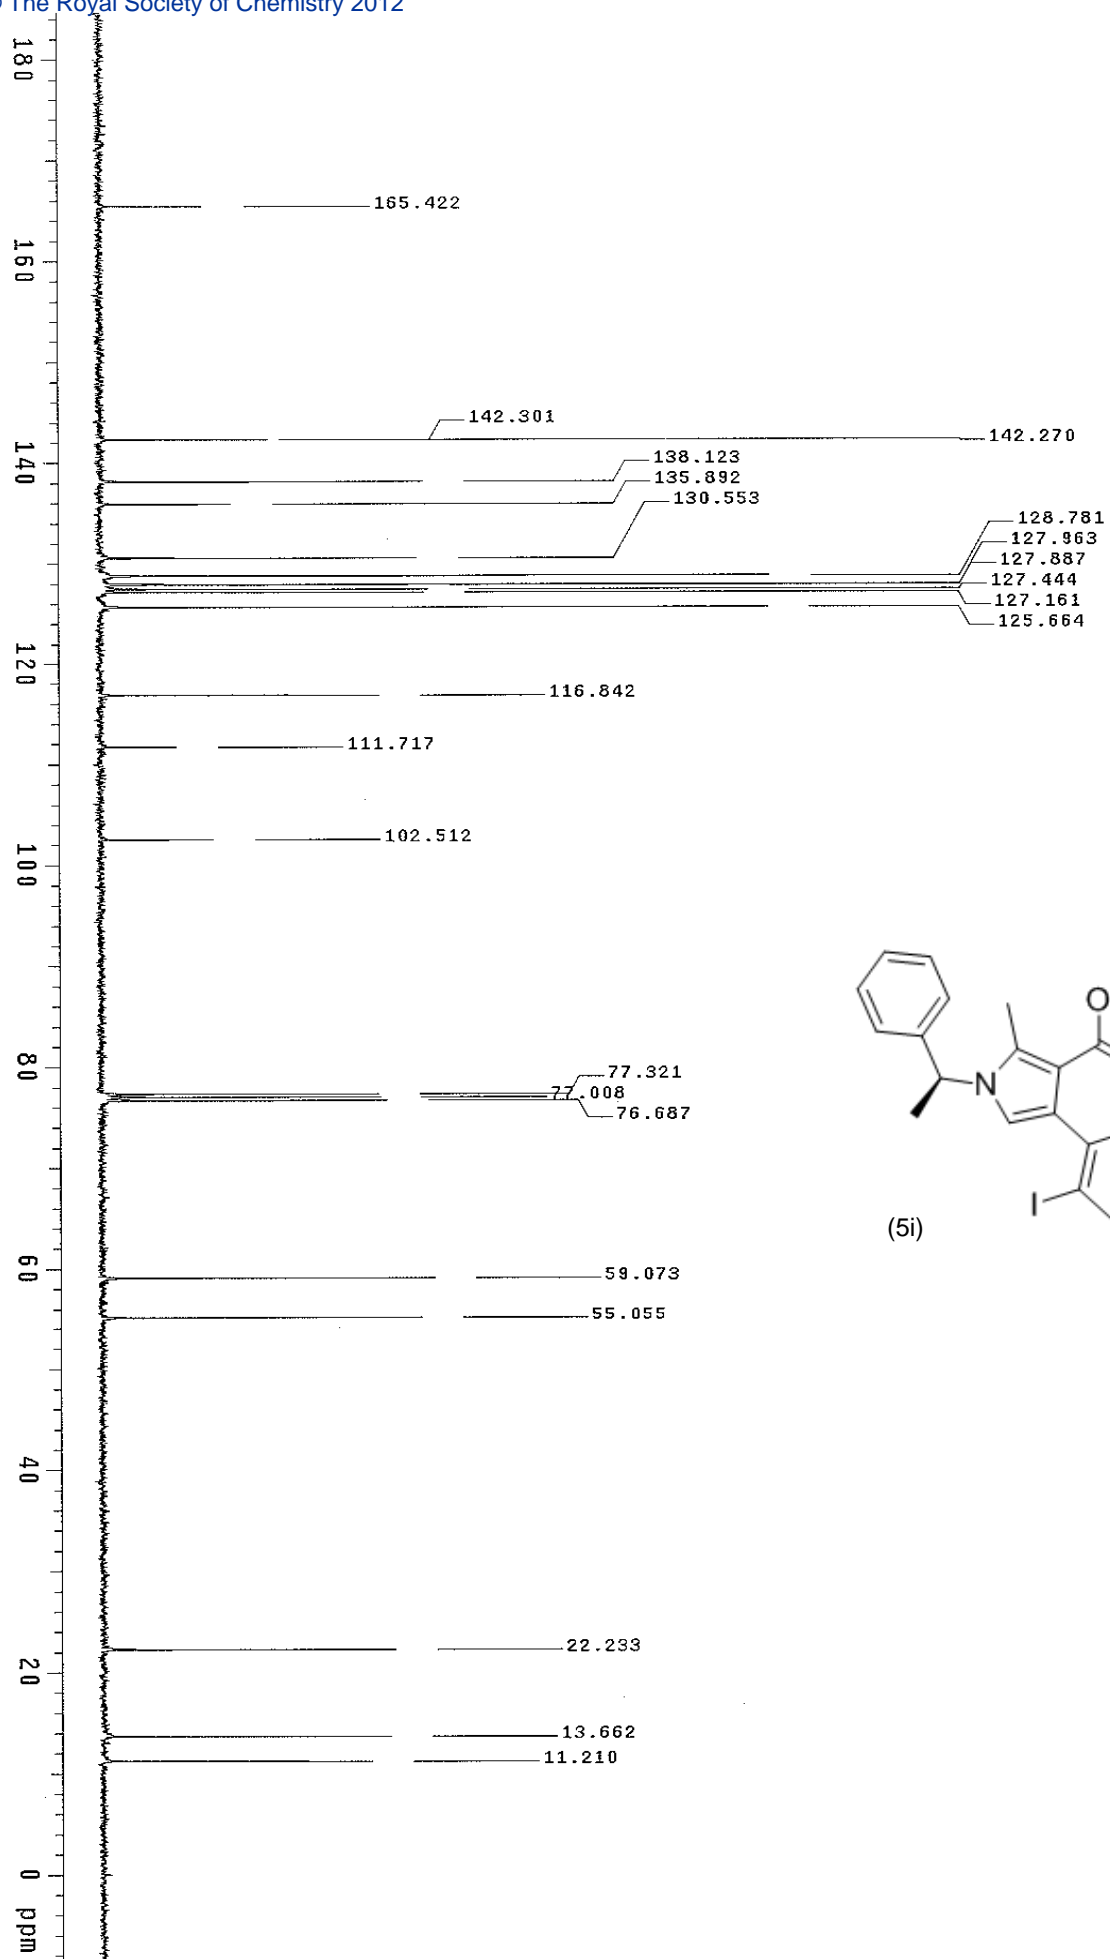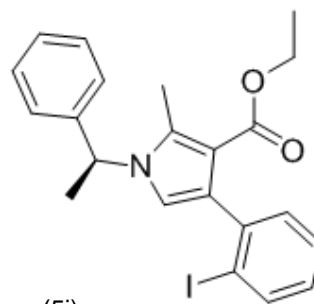

A009-CPFC-1/012

UT0911\_201 33 (0.762) Cm (32:34-57:68x0.010)

1: TOF MS ES+  
940

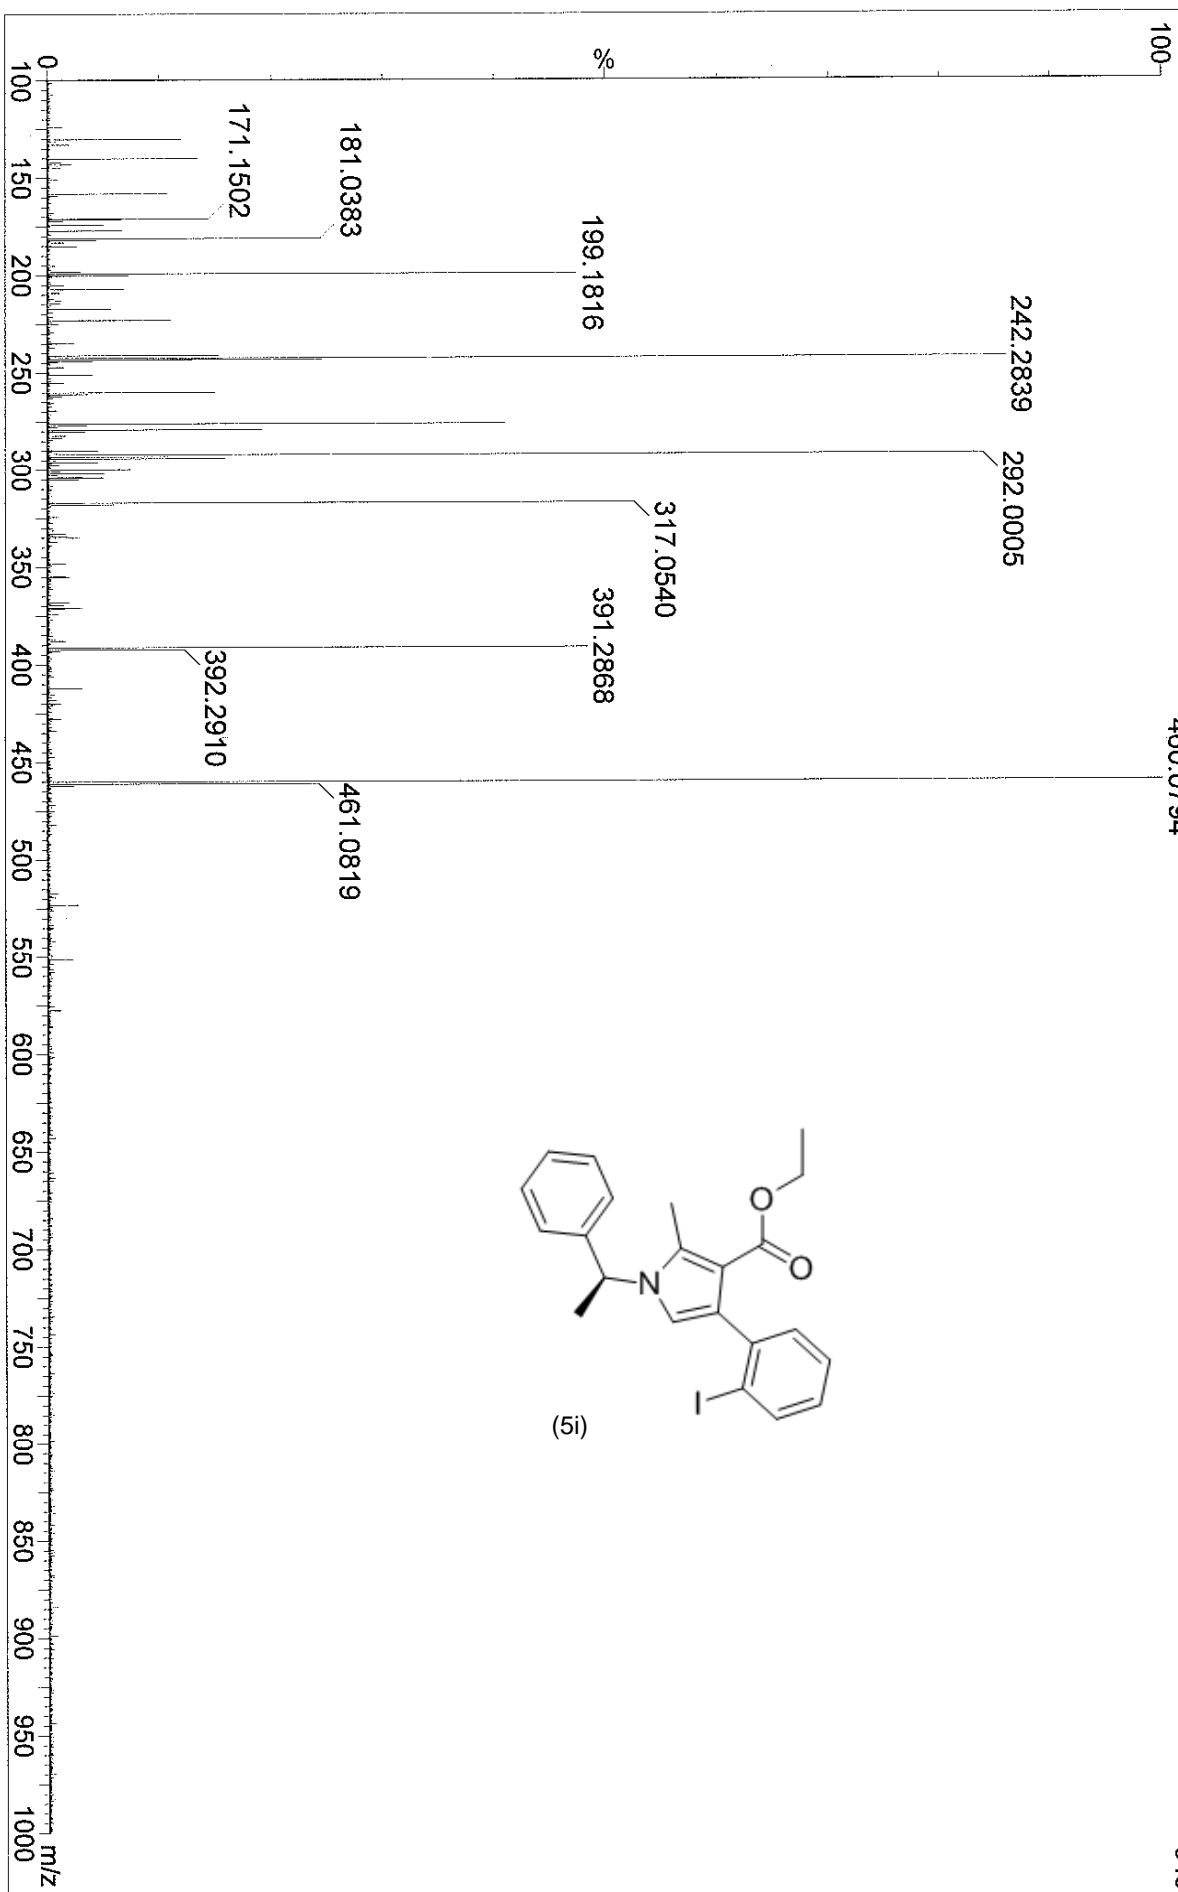

# Elemental Composition Report

## Single Mass Analysis

Tolerance = 5.0 PPM / DBE: min = 0.0, max = 80.0

Element prediction: Off

Number of isotope peaks used for i-FTT = 4

Monoisotopic Mass, Even Electron Ions

670 formula(e) evaluated with 1 results within limits (up to 4 best isotopic matches for each mass)

Elements Used:

C: 0-35 H: 0-55 N: 0-4 O: 0-6 Br: 0-1 I: 0-2

A009-CFEC-1/012

UT0911\_201 33 (0.762) Cm (32.34-57.68x0.010)

1: TOF MS ES+  
9.40e+002

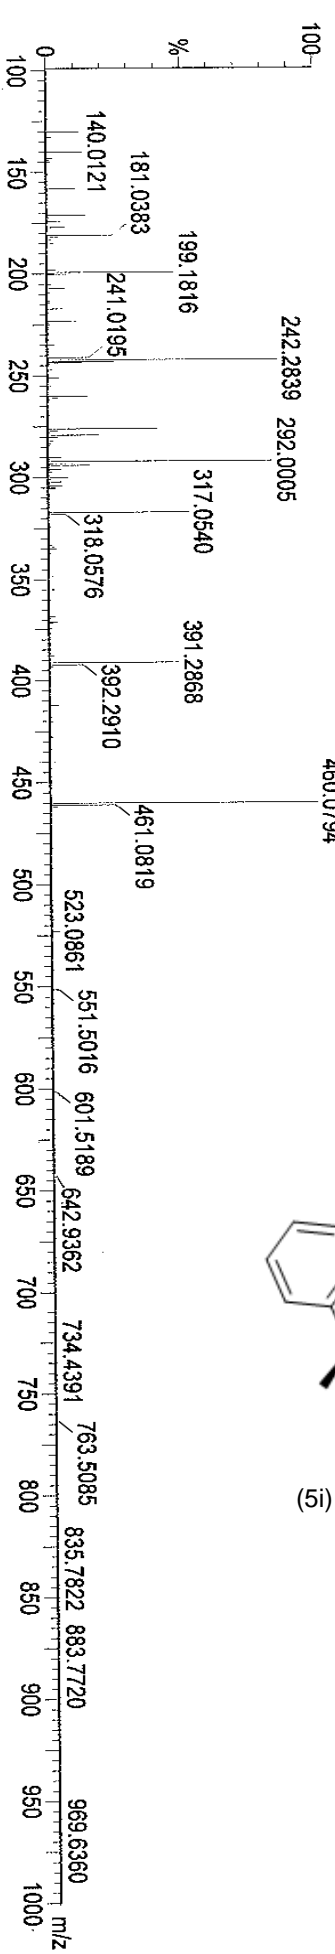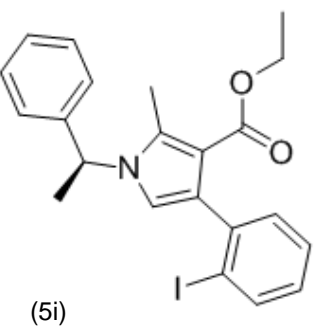

Minimum: 0.0  
Maximum: 80.0

| Mass     | Calc. Mass | mDa | PPM | DBE  | i-FTT | Formula        |
|----------|------------|-----|-----|------|-------|----------------|
| 460.0794 | 460.0774   | 2.0 | 4.3 | 11.5 | 2.4   | C22 H23 N O2 I |

A009-CPFC1-015 in CDCl<sub>3</sub>  
NMR-400

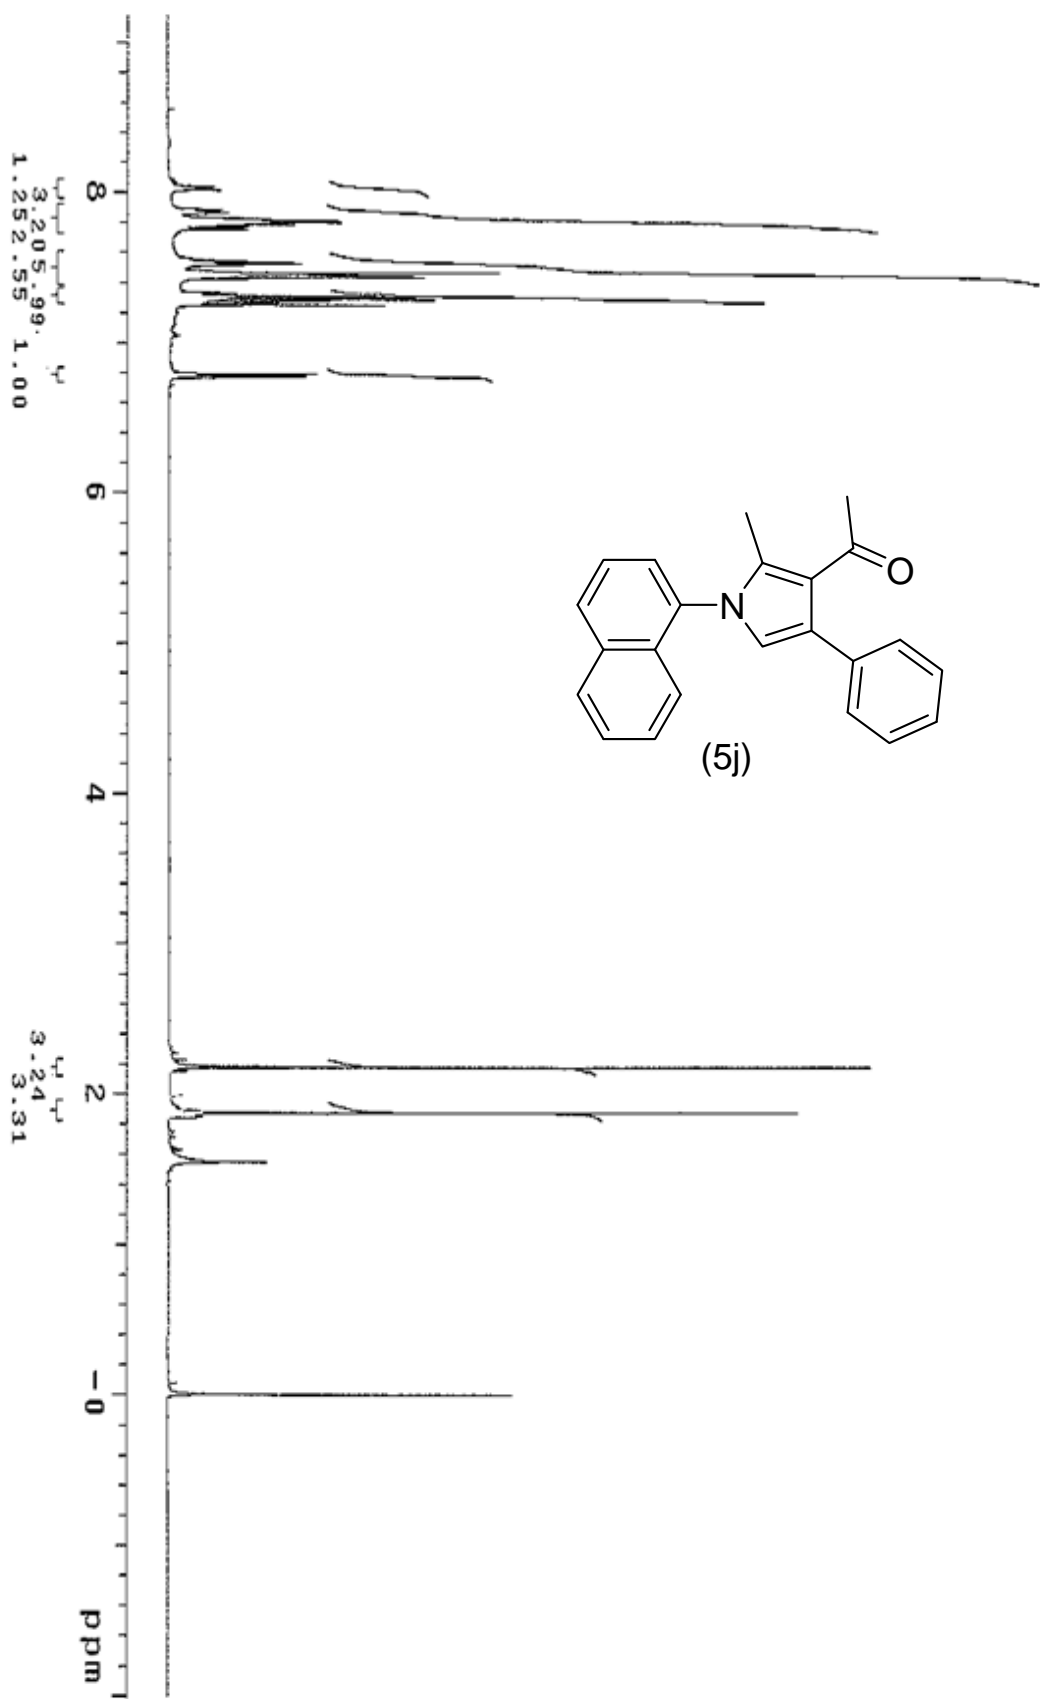

A009-CF-C-1-015 in CDCl<sub>3</sub>  
NMR-400MHZ

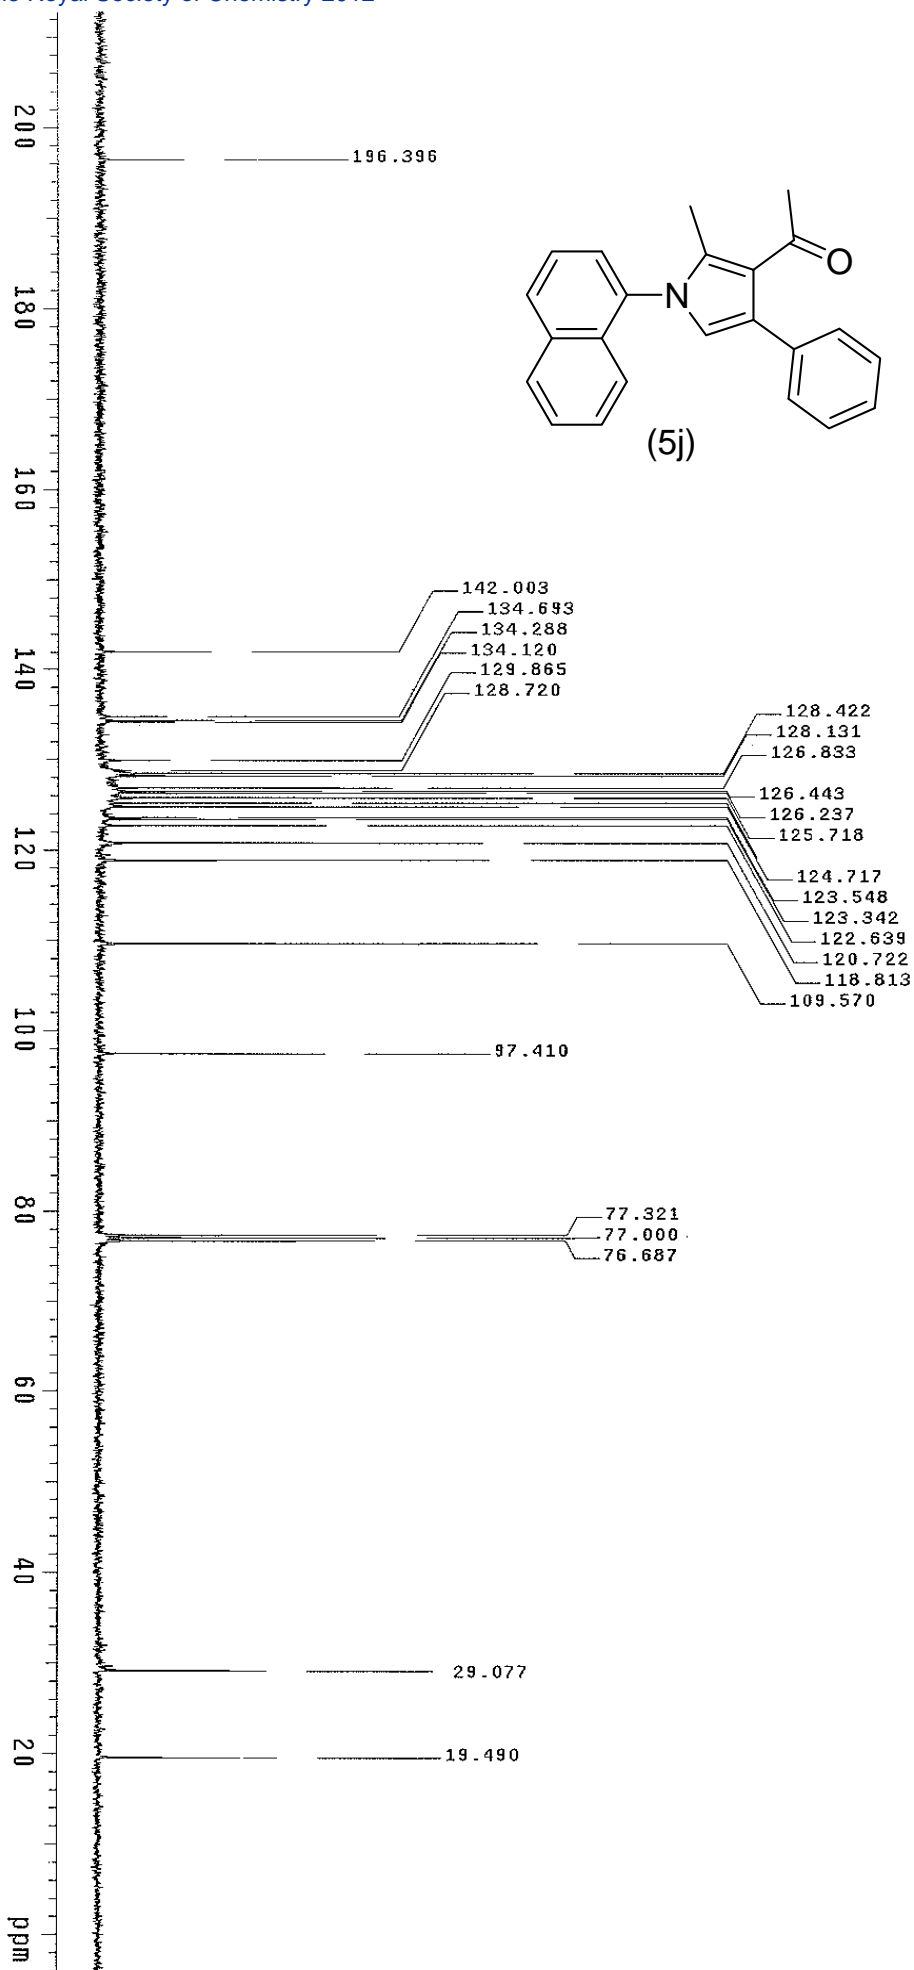

A009-CPFC-1/015

UT0911\_193 14 (0.323) Cm (11:20)

100 326.1547

1: TOF MS ES+  
2.16e3

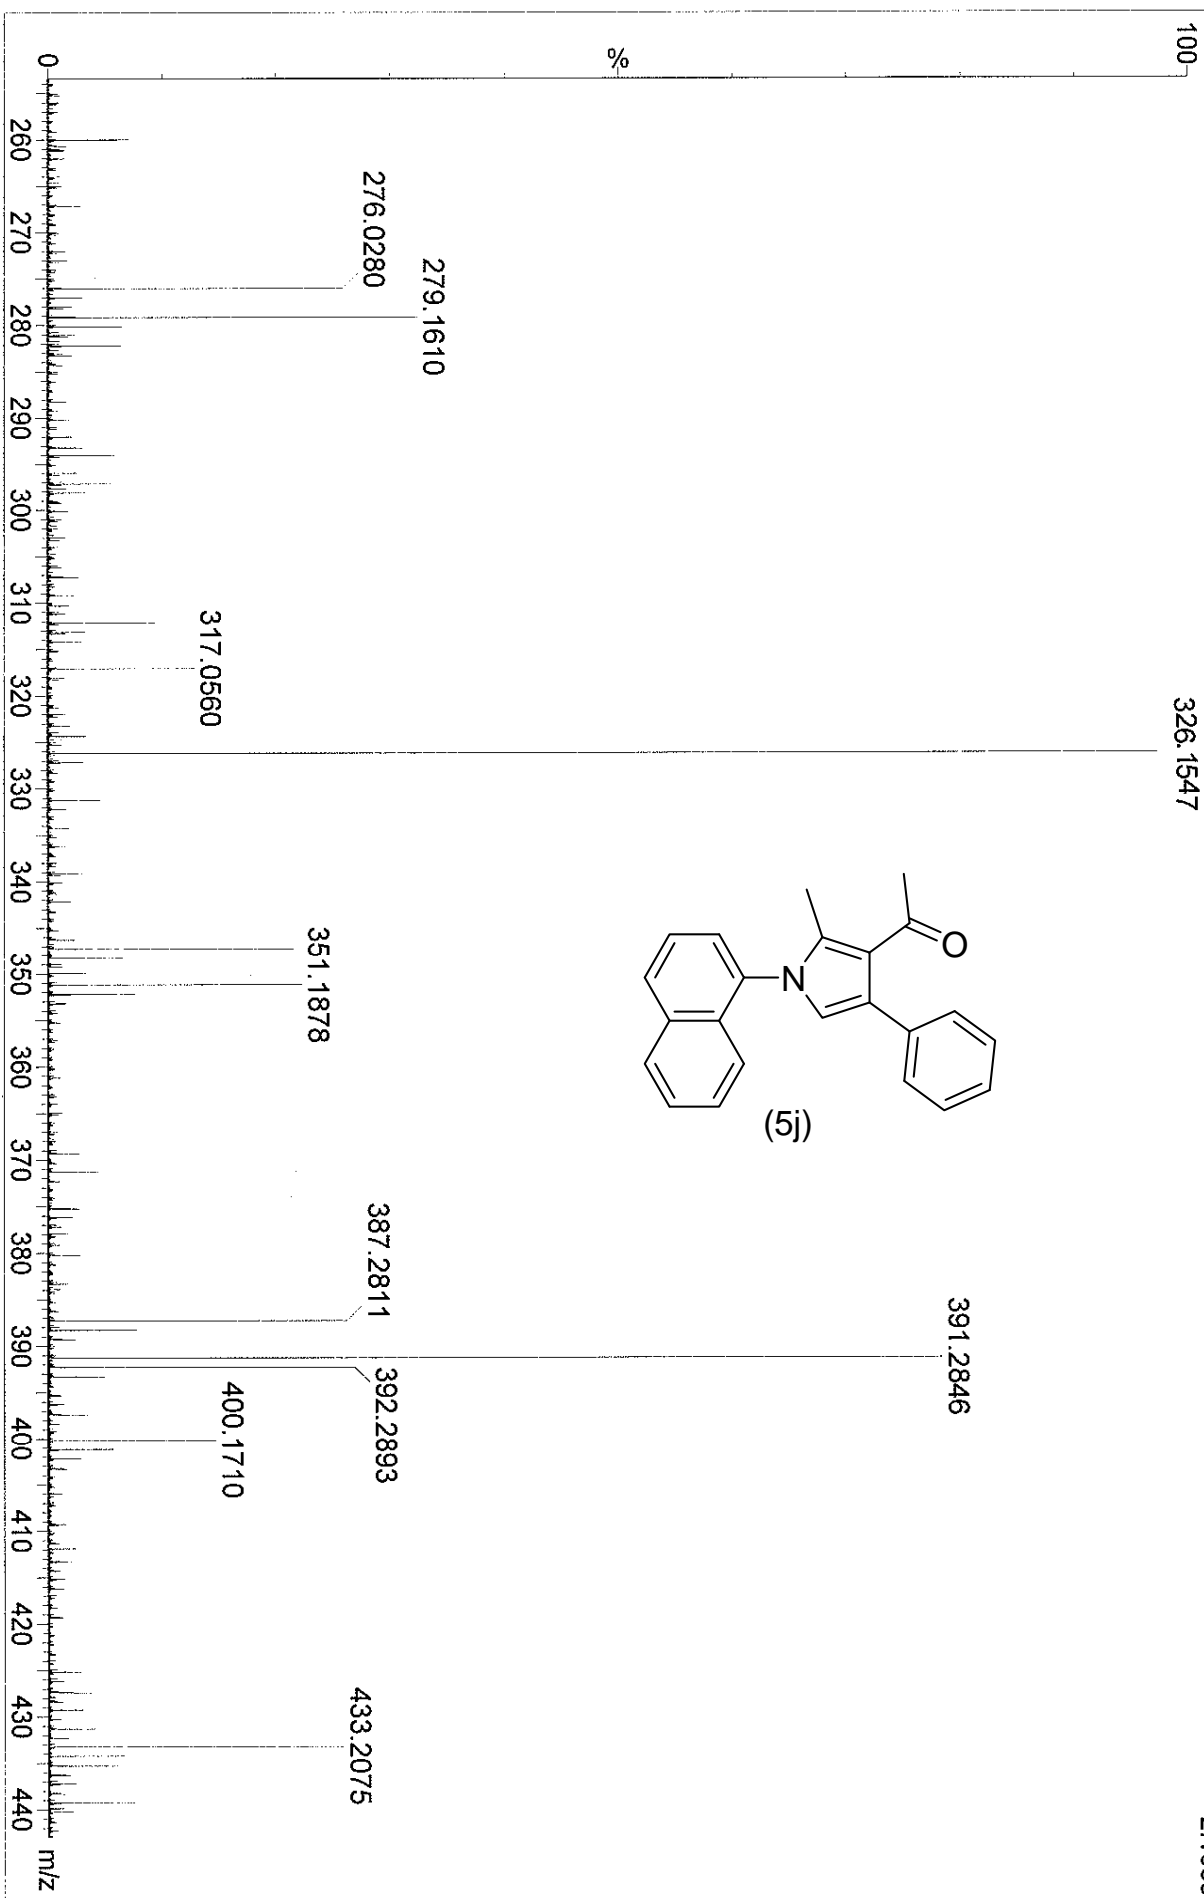



# Elemental Composition Report

## Single Mass Analysis

Tolerance = 5.0 PPM / DBE: min = 0.0, max = 80.0

Element prediction: Off

Number of isotope peaks used for i-FIT = 4

Monoisotopic Mass, Even Electron Ions

223 formula(e) evaluated with 1 results within limits (up to 4 best isotopic matches for each mass)

Elements Used:

C: 0-70 H: 0-80 N: 0-5 O: 0-10

A009-CPFC-1/015

UT0911\_193\_14 (0.329) Cm (11:20)

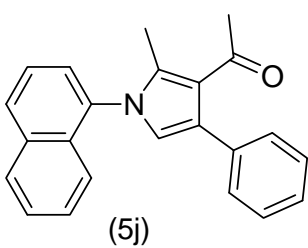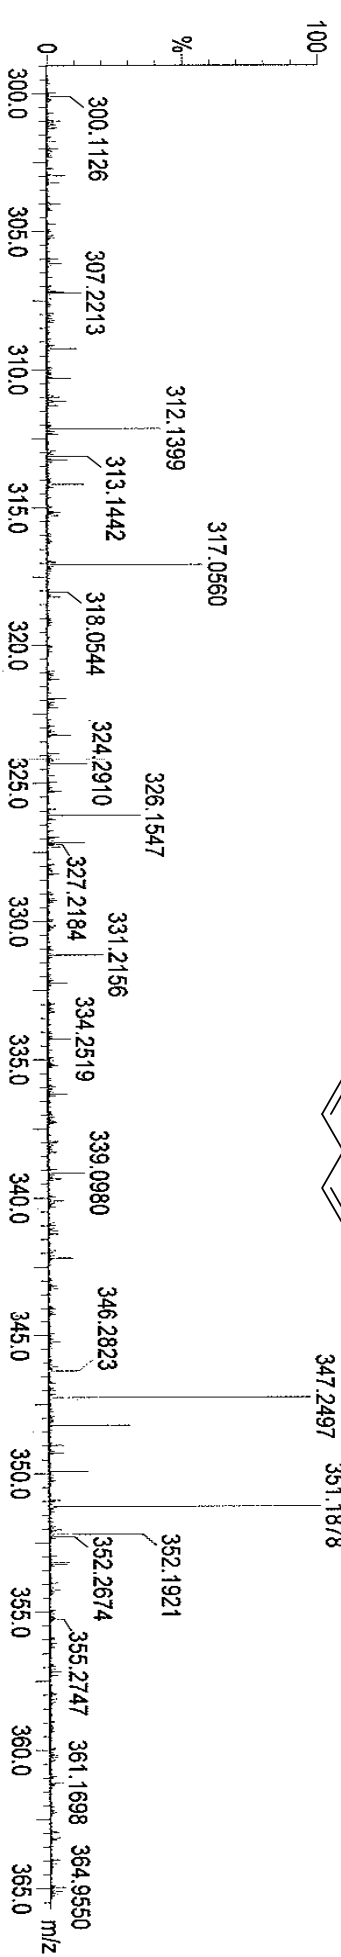

1: TOF MS ES+  
4.83e+002

Minimum: 0.0  
Maximum: 5.0 PPM  
5.0 DBE  
80.0

| Mass     | Calc. Mass | mDa | PPM | DBE  | i-FIT | Formula     |
|----------|------------|-----|-----|------|-------|-------------|
| 326.1547 | 326.1545   | 0.2 | 0.6 | 14.5 | 9,1   | C23 H20 N O |

A009/CPFC-1/0116 in CDCl<sub>3</sub>  
NMR-400

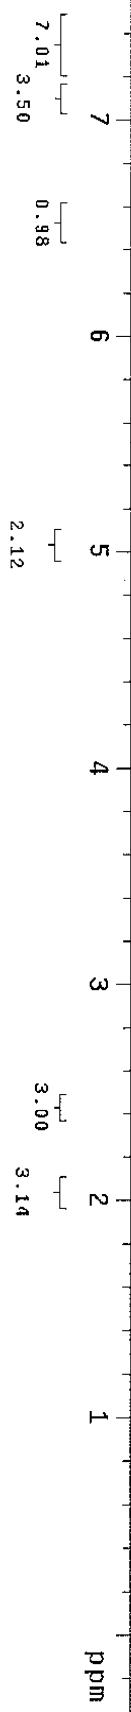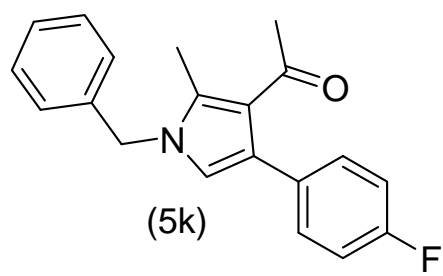

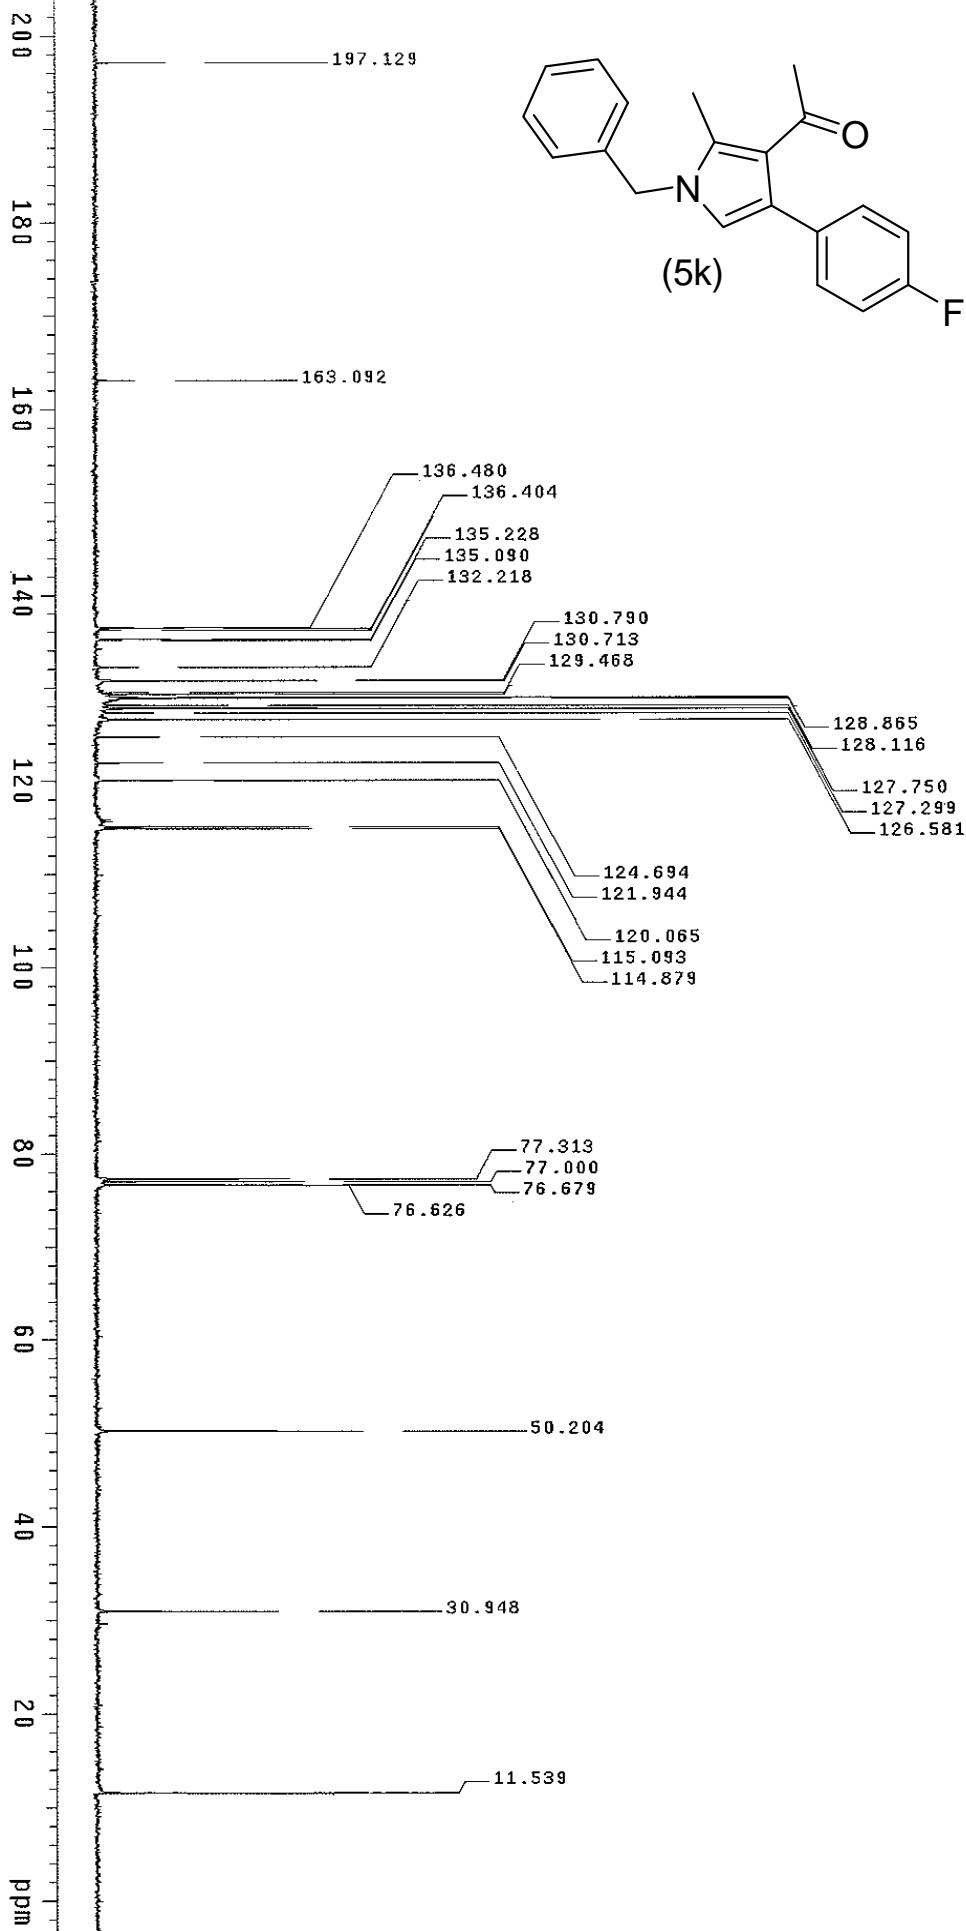

A009-CPFC-1-016 in CDCl<sub>3</sub>  
NMR-400

A009-CPFC-1/016

UT0911\_202 26 (0.597) Cm (26:30-75:82x0.010)

308.1443

1: TOF MS ES+  
3.85e3

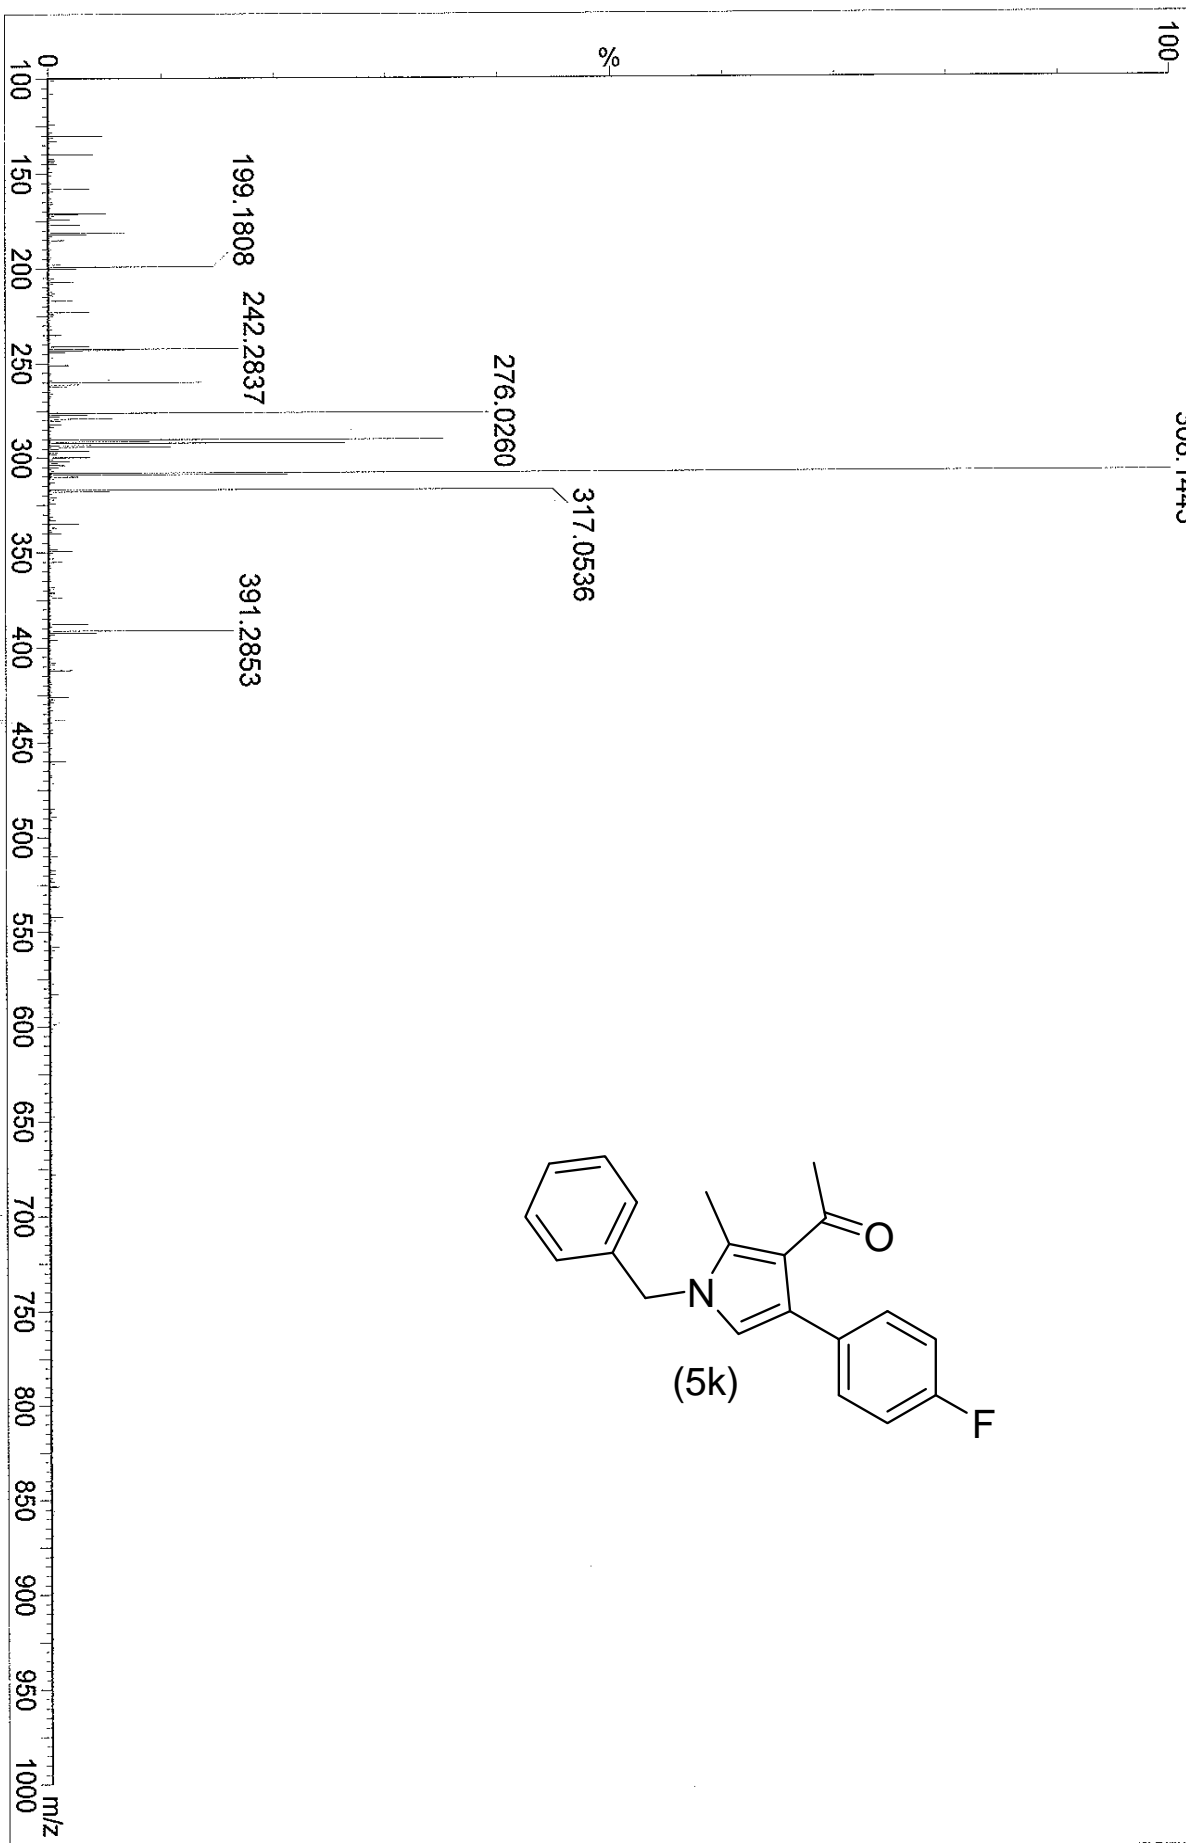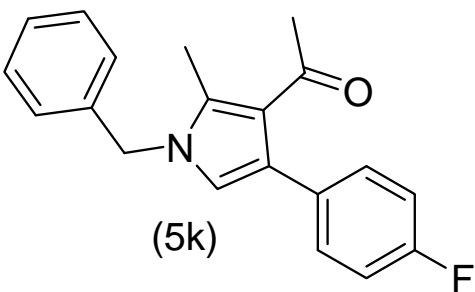

# Elemental Composition Report

## Single Mass Analysis

Tolerance = 5.0 PPM / DBE: min = 0.0, max = 80.0

Element prediction: Off

Number of isotope peaks used for i-FTT = 4

Monoisotopic Mass, Even Electron Ions

249 formula(e) evaluated with 2 results within limits (up to 4 best isotopic matches for each mass)

Elements Used:

C: 0-35 H: 0-55 N: 0-4 O: 0-6 F: 0-1

A009-CPFC-1/016

UT0911\_202.26 (0.597) Cm (26.30-75.82x0.010)

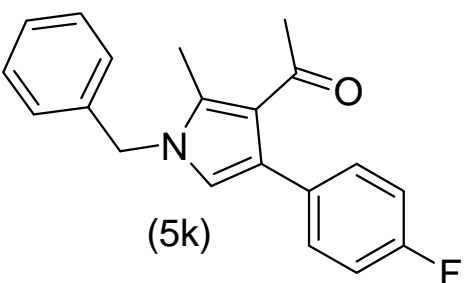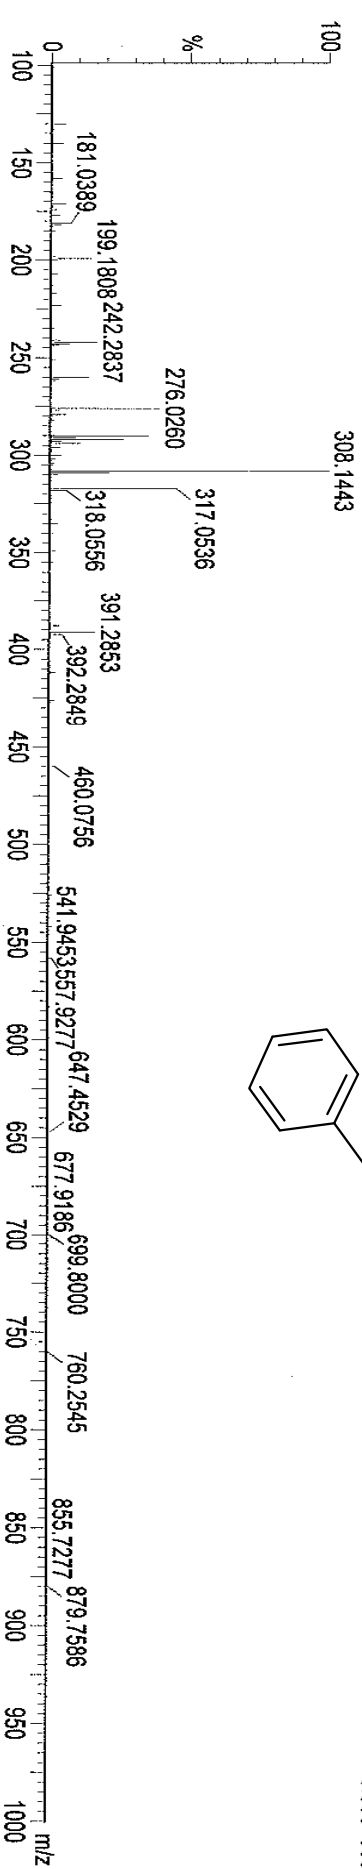

1: TOF MS ES+  
3.85e+003

Minimum: 0.0  
Maximum: 5.0

| Mass     | Calc. Mass | mDa  | PPM  | DBE  | i-FTT | Formula       |
|----------|------------|------|------|------|-------|---------------|
| 308.1443 | 308.1451   | -0.8 | -2.6 | 11.5 | 5.6   | C20 H19 N O F |

A009/CPFC-1/017 in CDCl<sub>3</sub>  
NMR-400

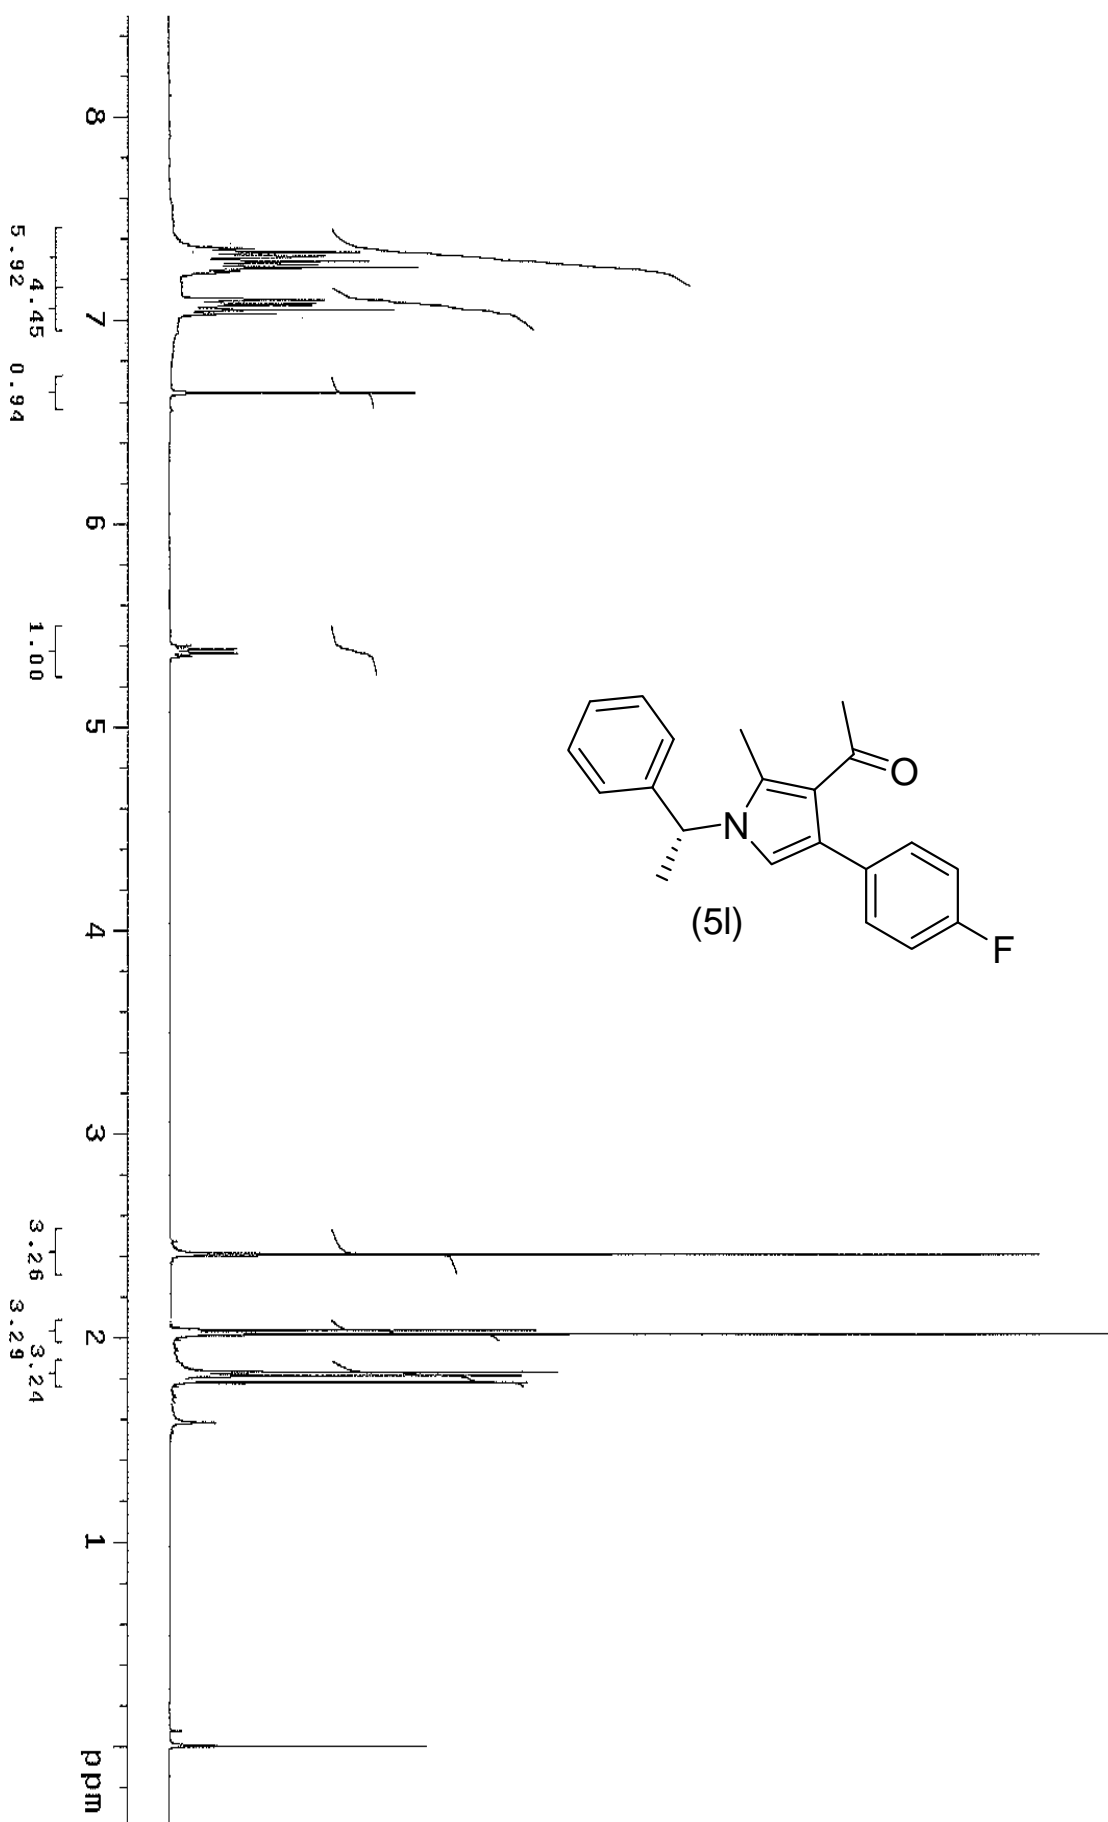

A009-CF-C-1-017 in CDCl<sub>3</sub>  
NMR-400

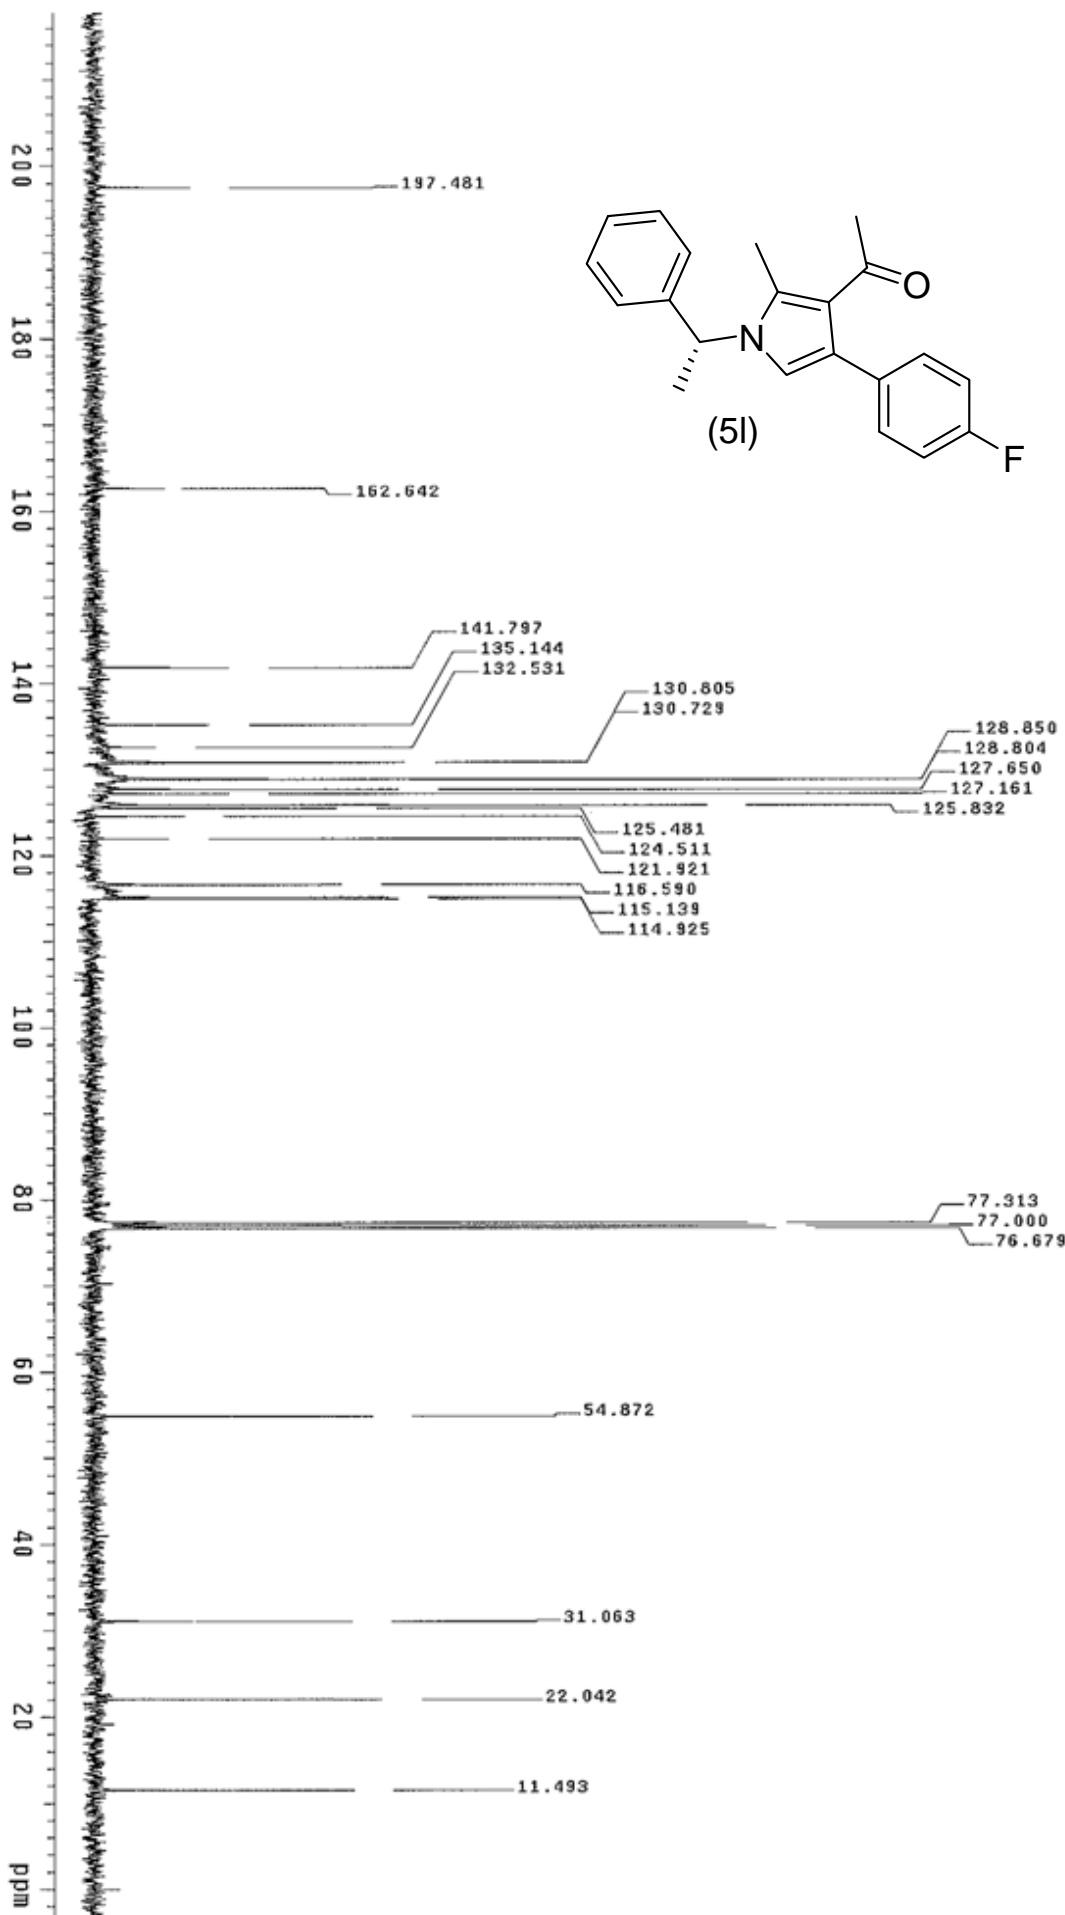

A009/CPFC-4-017

UT0911\_119 18 (0.492) Cm (18:20-48:56x0.010)  
322.1594

1: TOF MS ES+  
8.21e3

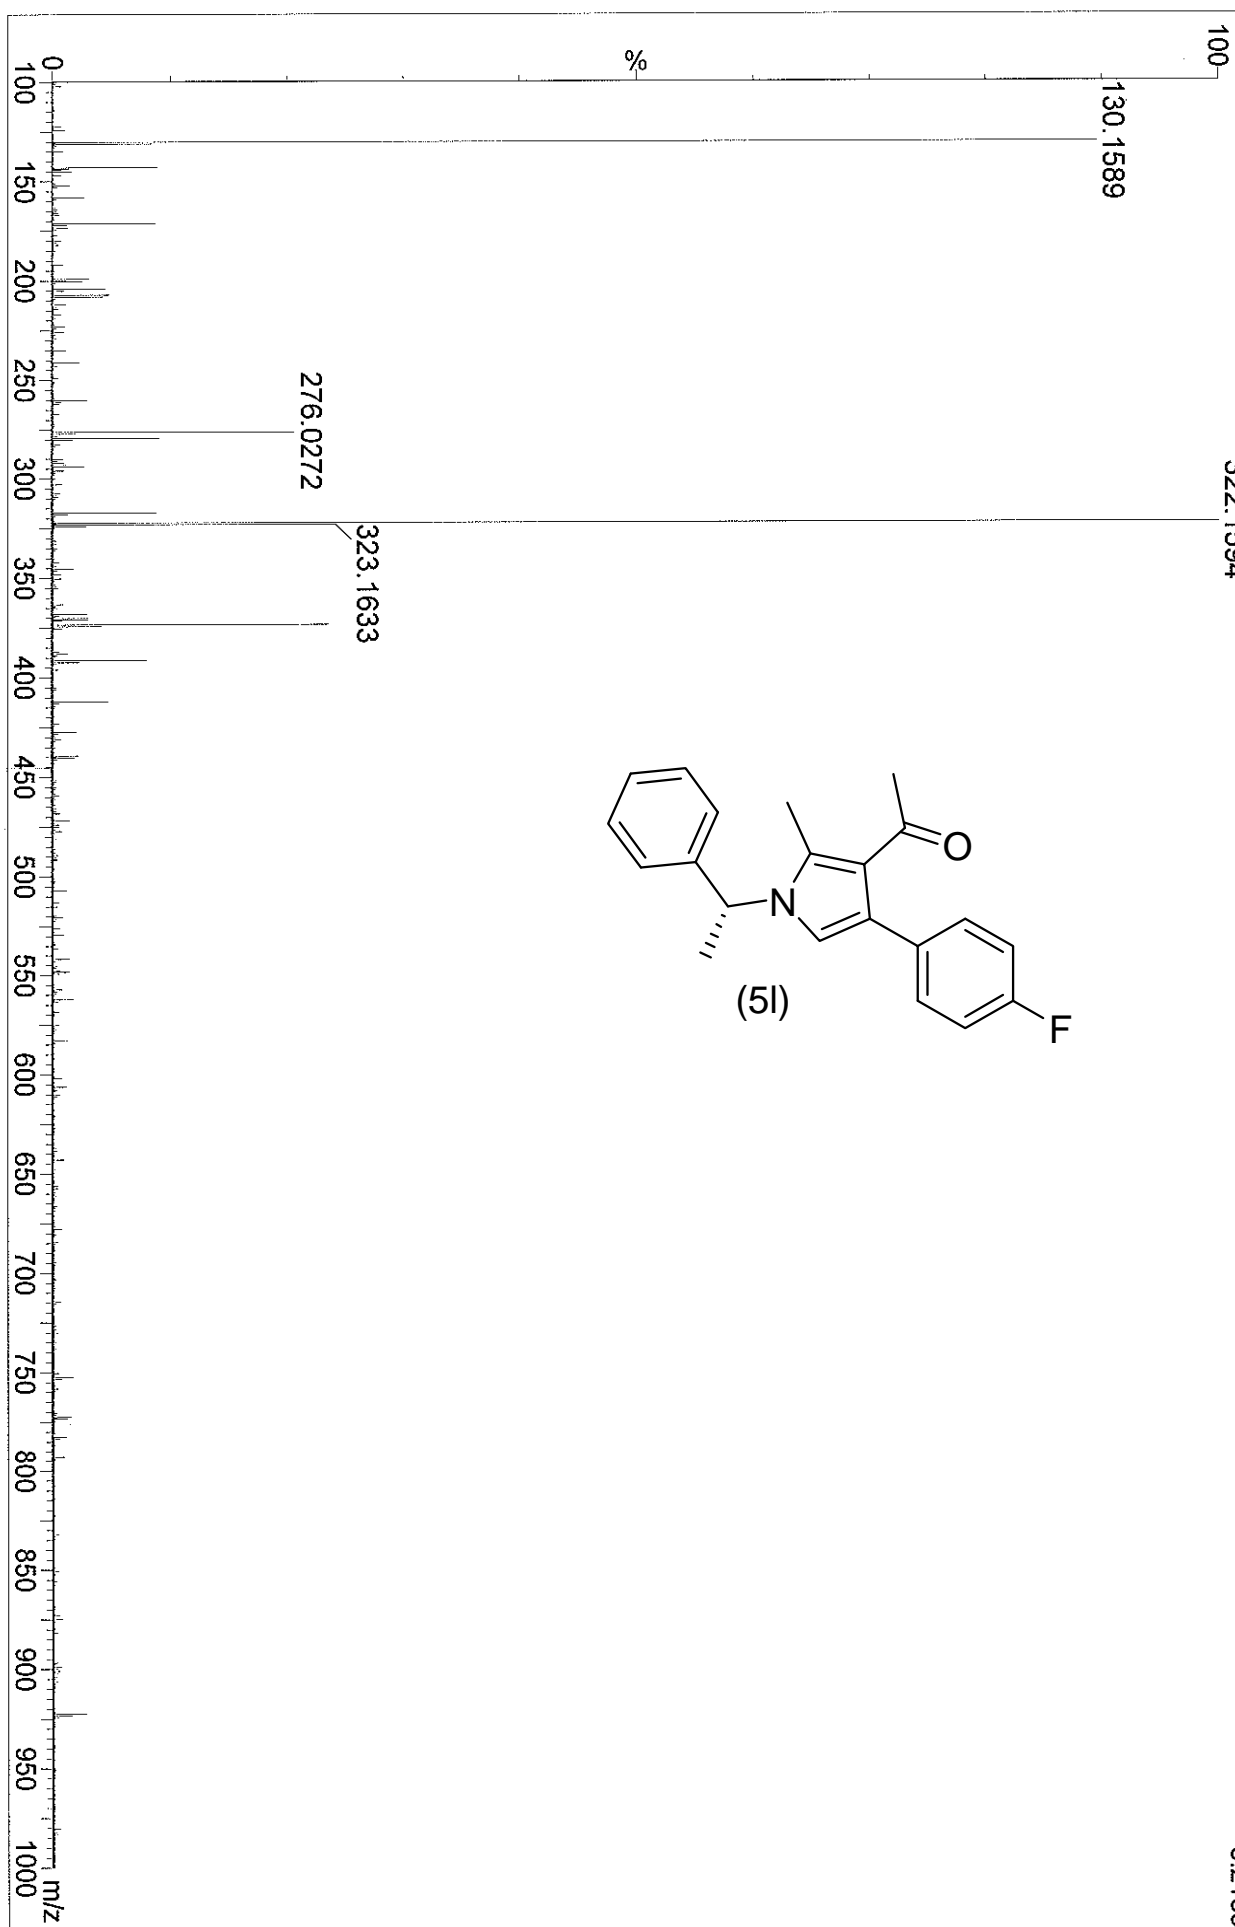



## Elemental Composition Report

### Single Mass Analysis

Tolerance = 5.0 PPM / DBE: min = 0.0, max = 80.0

Element prediction: Off

Number of isotope peaks used for i-FIT = 3

Monoisotopic Mass, Even Electron Ions

235 formula(e) evaluated with 2 results within limits (up to 4 best isotopic matches for each mass)

Elements Used:

C: 0-50 H: 0-65 N: 0-5 O: 0-4 F: 0-1

A009/CPFC-4-017

UT0911\_119.18 (0.492) Cm (18:20-48:56x0.010)

1: TOF MS ES+  
8.21e+003

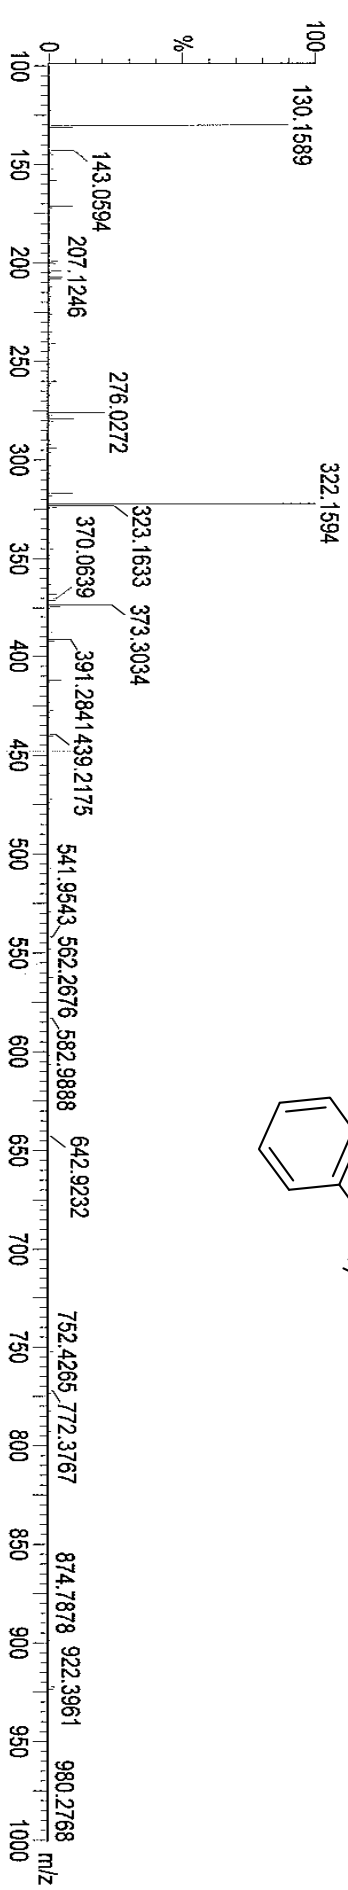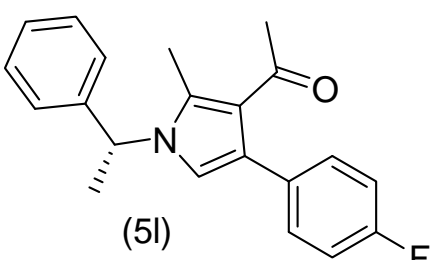

| Mass     | Calc. Mass | mDa  | PPM  | DBE  | i-FIT | Formula       |
|----------|------------|------|------|------|-------|---------------|
| 322.1594 | 322.1607   | -1.3 | -4.0 | 11.5 | 0.6   | C21 H21 N O F |

Minimum: 0.0  
Maximum: 80.0

A009/CPFC-1/018 in CDCl<sub>3</sub>  
NMR-400

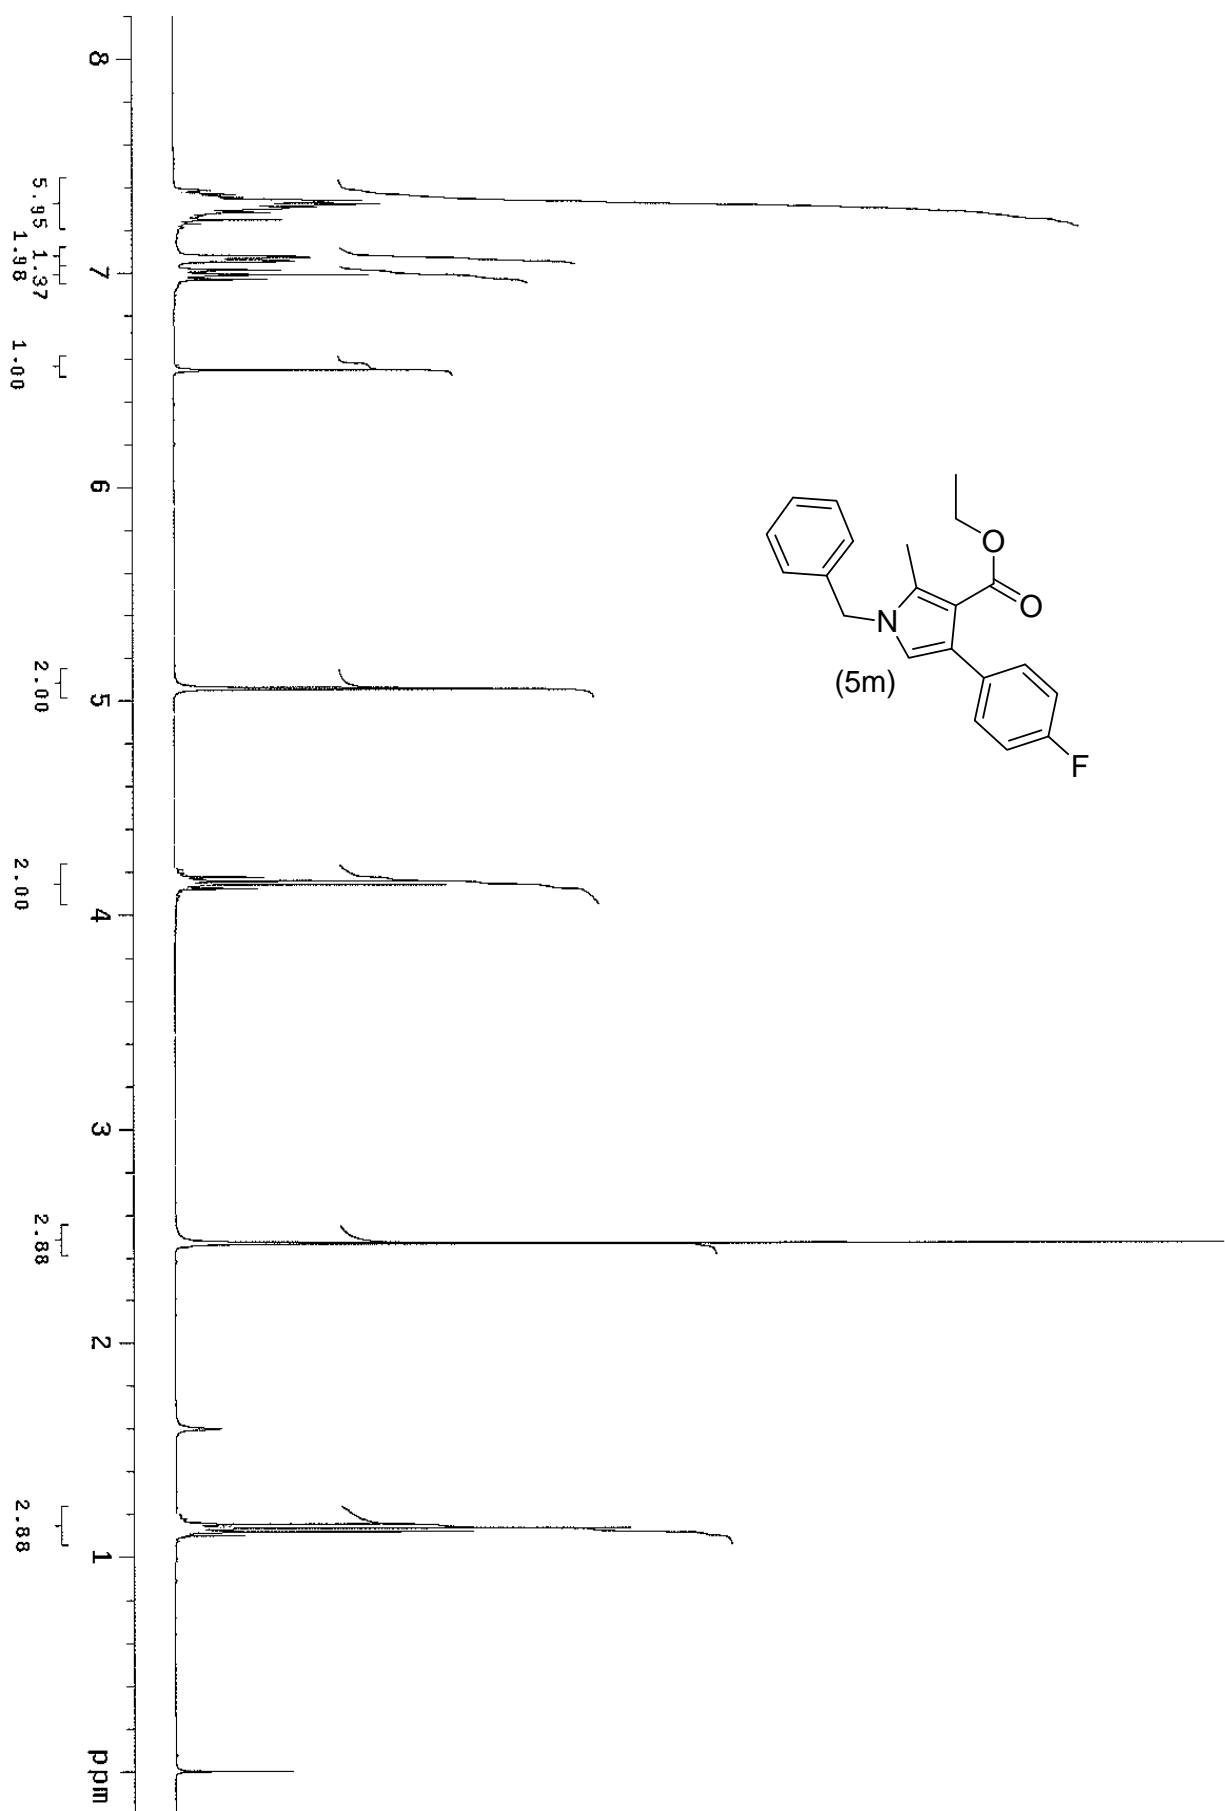

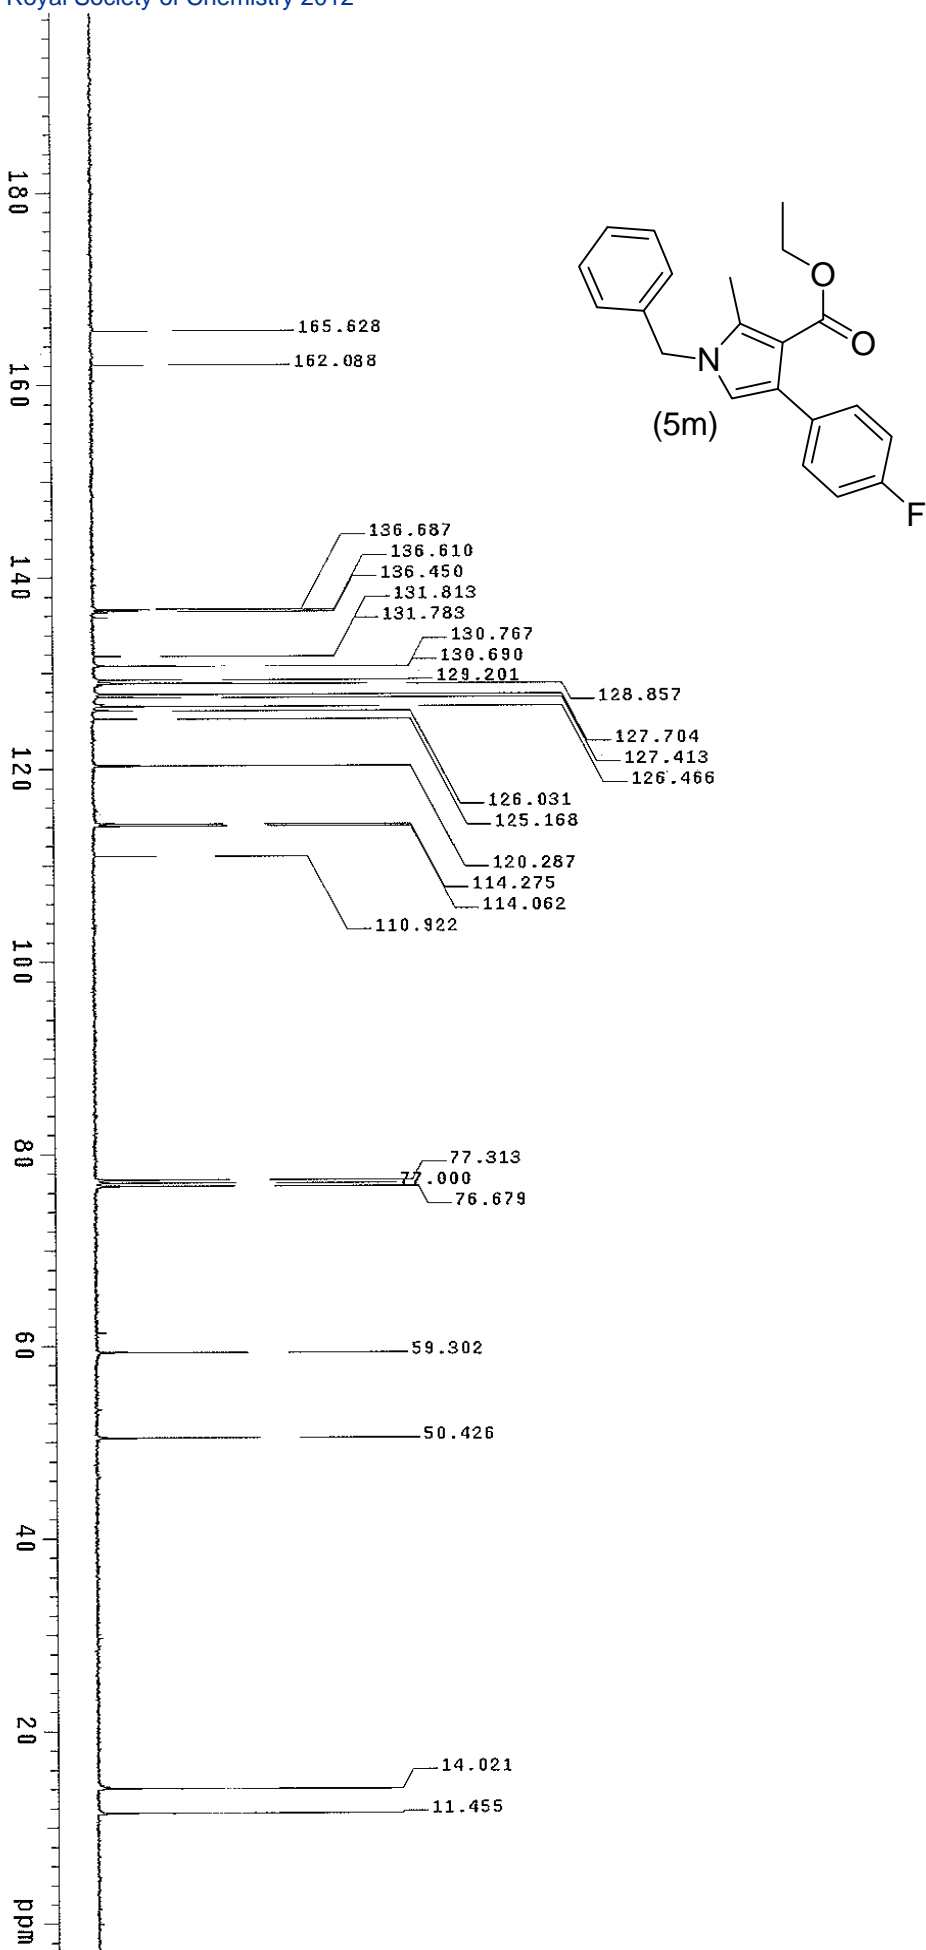

A009-CF-C-1-018 in CDCl<sub>3</sub>  
NMR-400

A009/CPFC-4-018

UT0911\_120 19 (0.513) Cm (19:20-61:66x0.010)  
338.1541

1: TOF MS ES+  
7.26e3

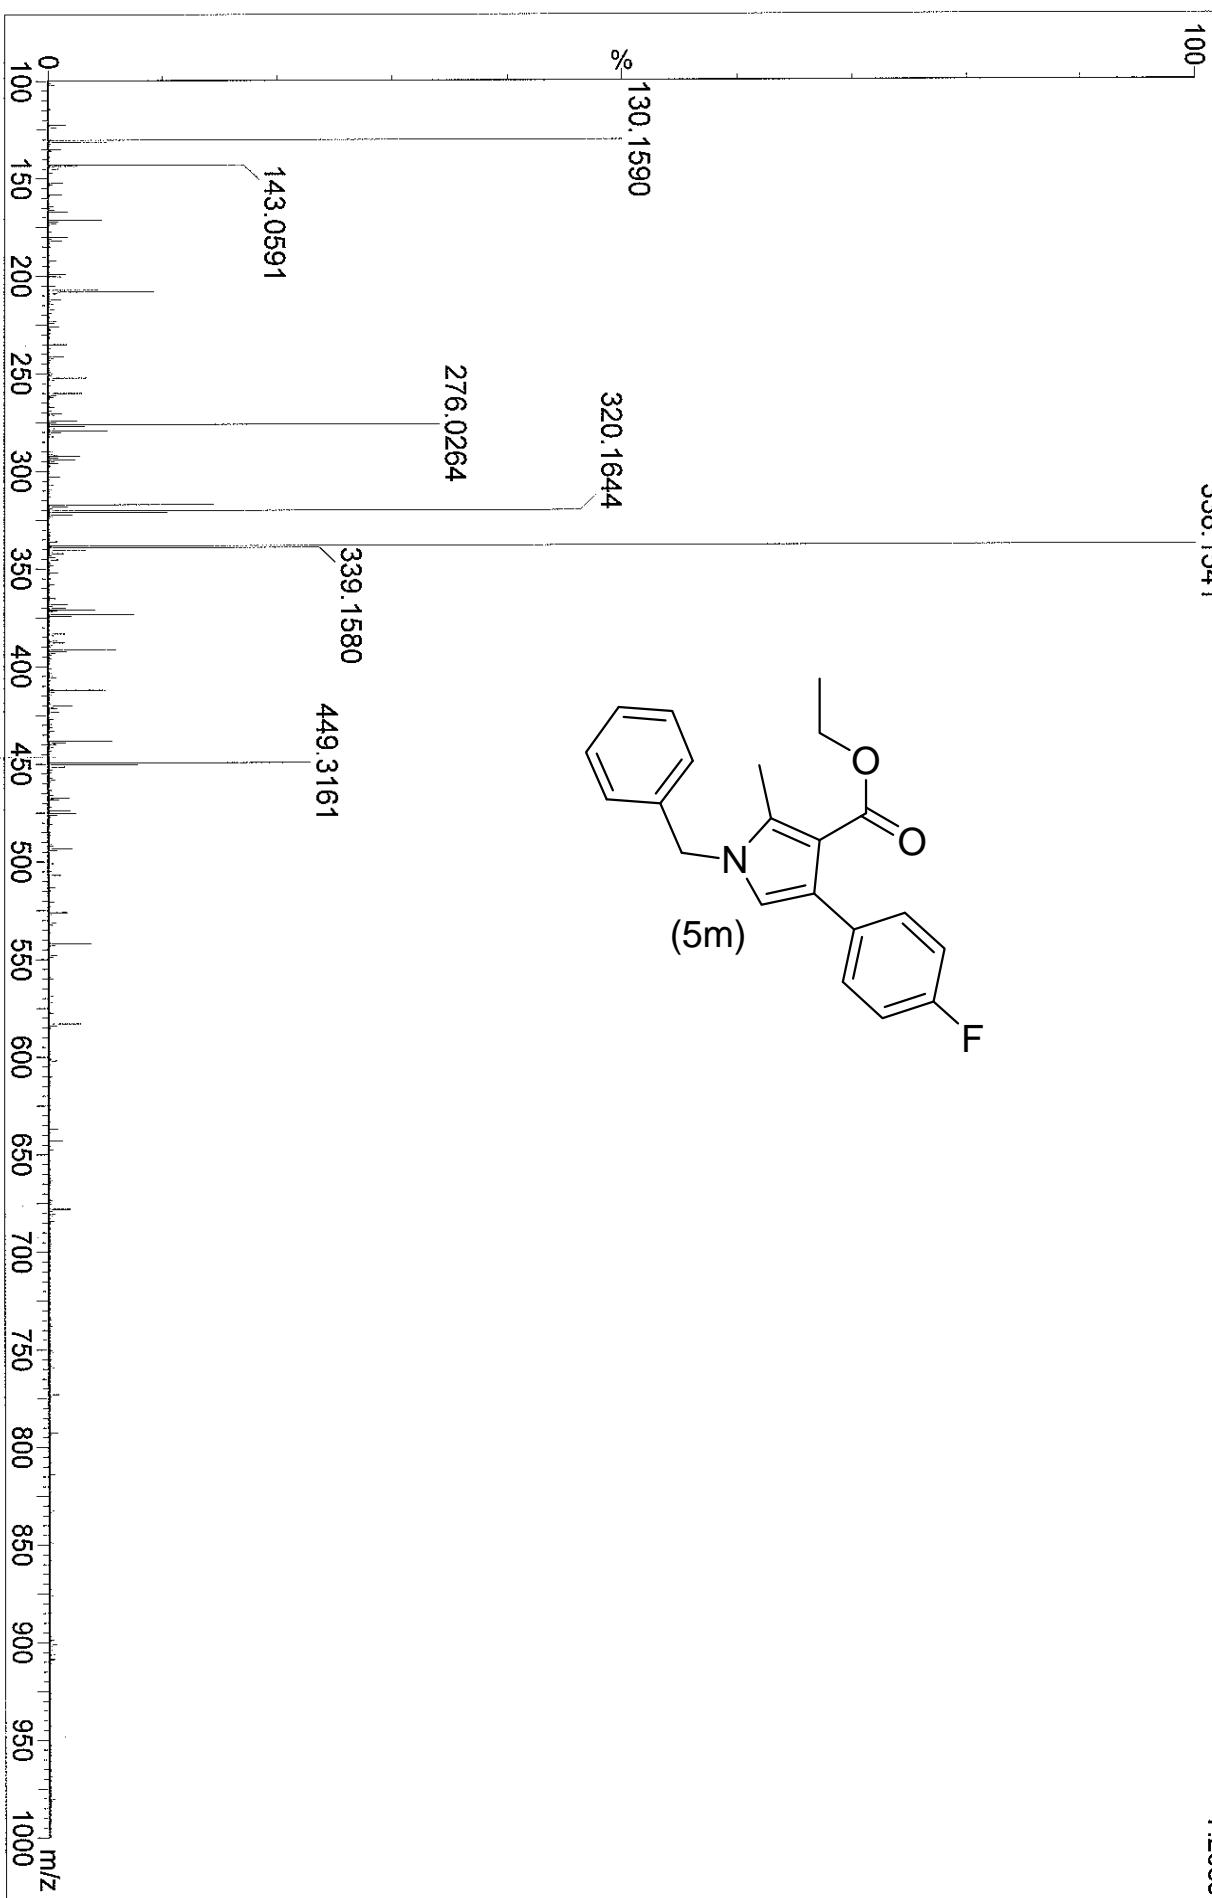

# Elemental Composition Report

## Single Mass Analysis

Tolerance = 5.0 PPM / DBE: min = 0.0, max = 80.0

Element prediction: Off

Number of isotope peaks used for i-FIT = 3

Monoisotopic Mass, Even Electron Ions

246 formula(e) evaluated with 2 results within limits (up to 4 best isotopic matches for each mass)

Elements Used:

C: 0-50 H: 0-65 N: 0-5 O: 0-4 F: 0-1

A009/CPFC-4.018

UT0911\_120 19 (0.513) Cm (19:20:61:66x0.010)

1: TOF MS ES+  
7.27e+003

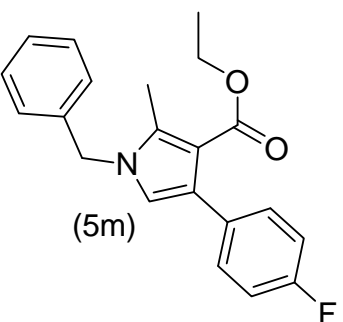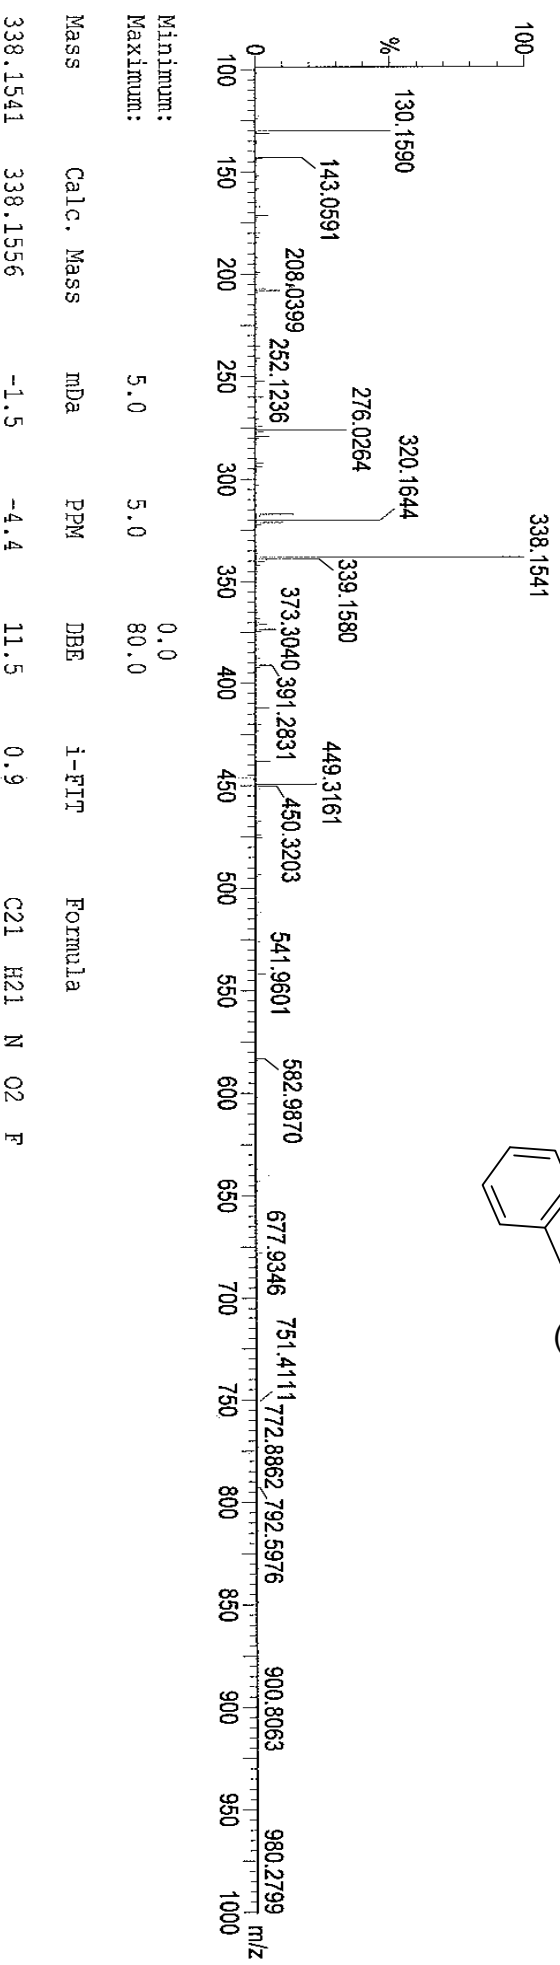

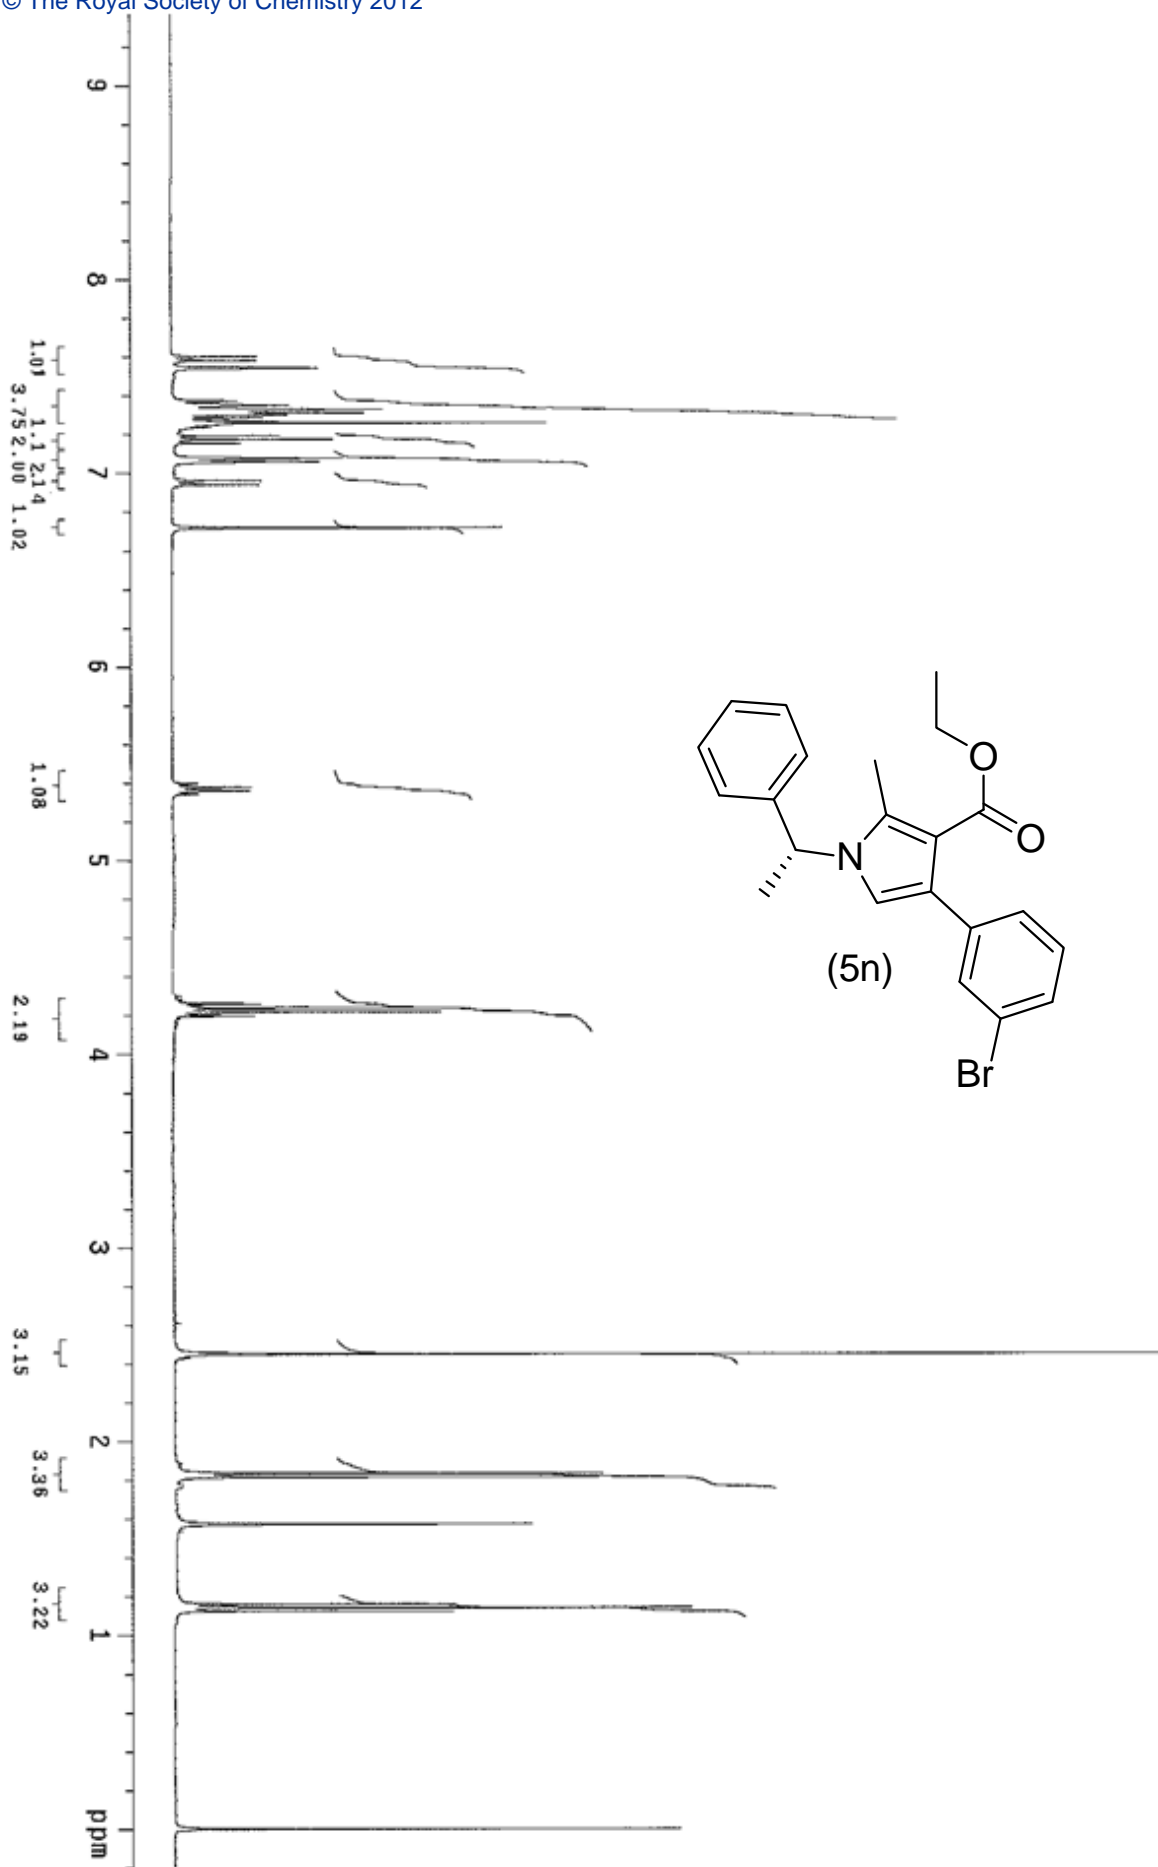

A009/C/PFC-3/019 1n CDCl3  
NMR-400

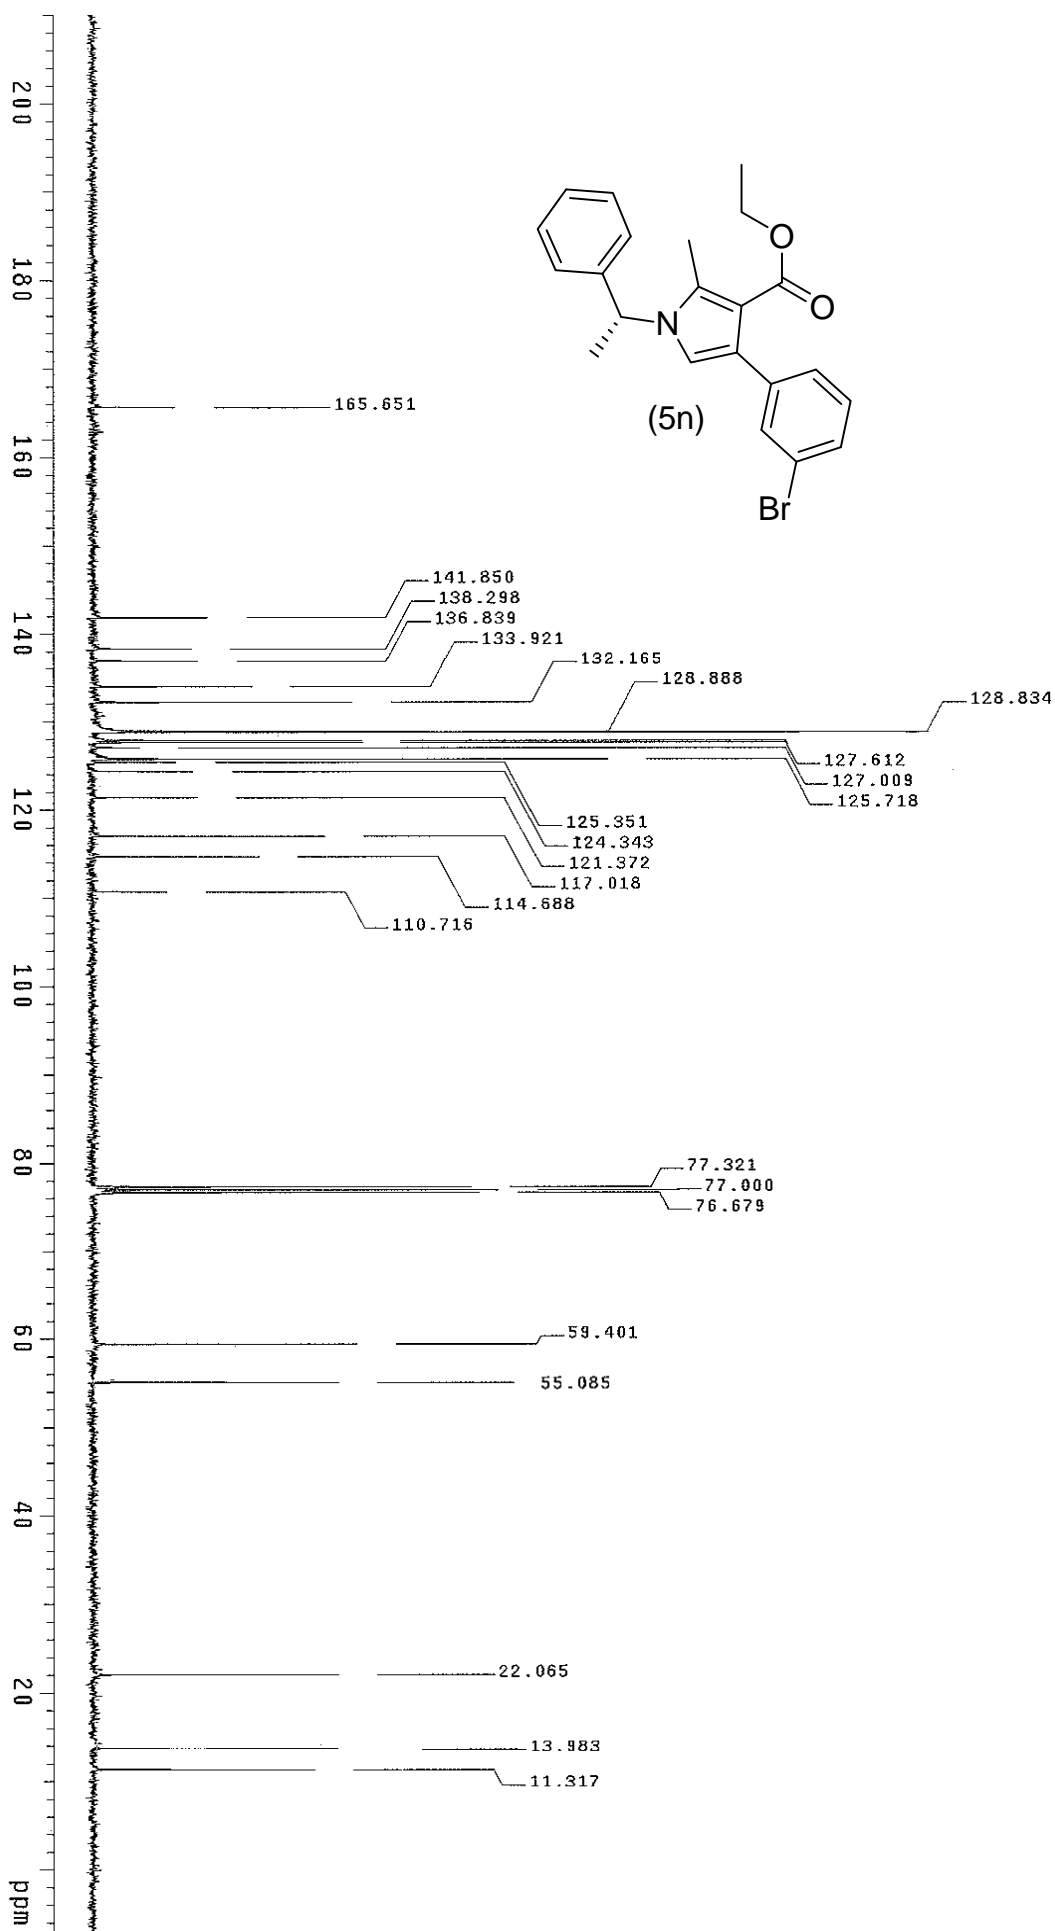

A009-CPFC-1/019

UT0911\_195 23 (0.519) Cm (23:28-59:76x0.010)

322.0668

TOF MS ES+  
1.72e3

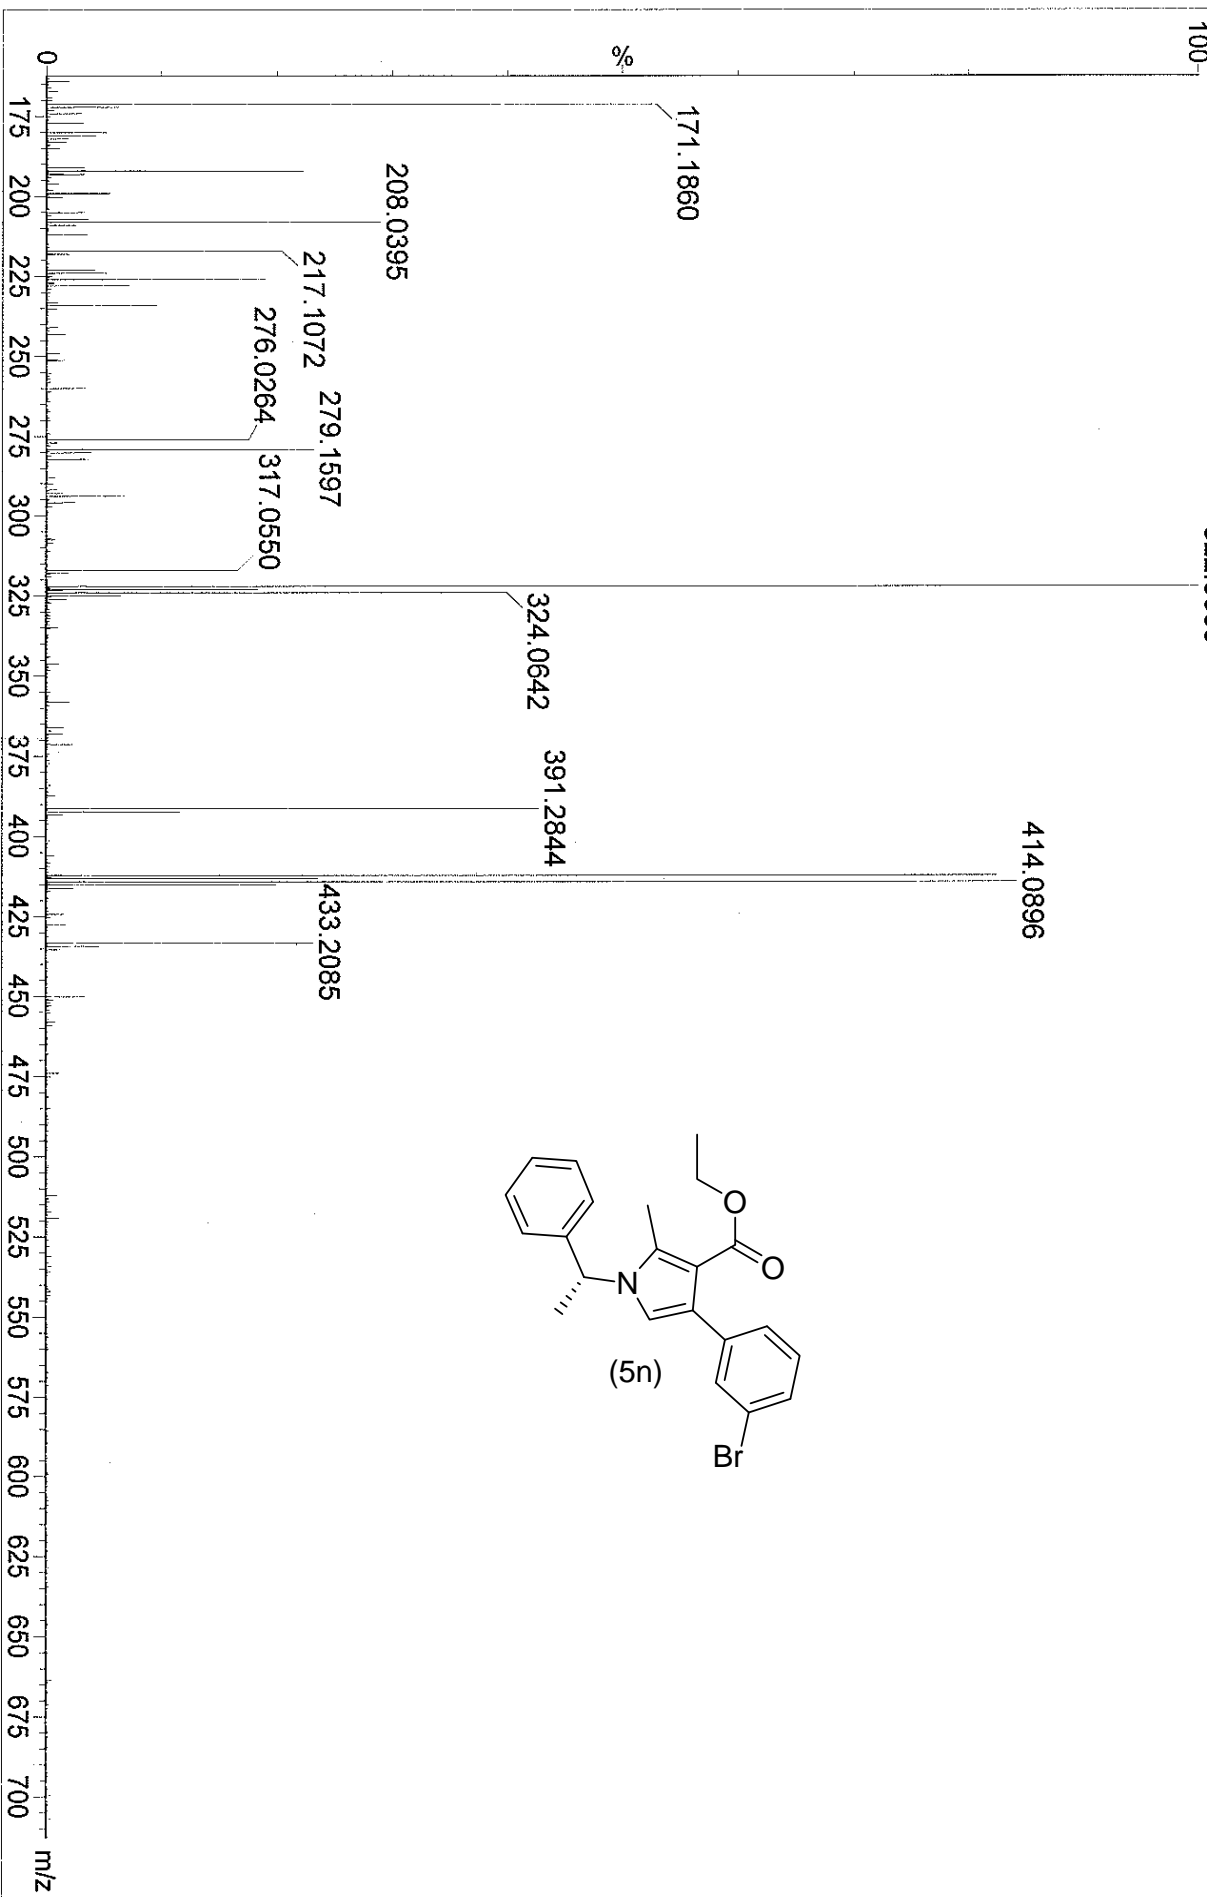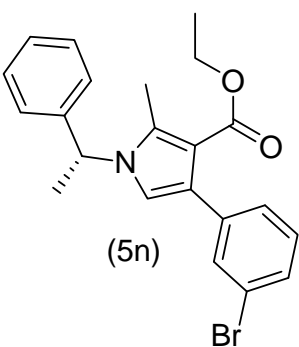



# Elemental Composition Report

## Single Mass Analysis

Tolerance = 5.0 PPM / DBE: min = 0.0, max = 80.0

Element prediction: Off

Number of isotope peaks used for i-FIT = 4

Monoisotopic Mass, Even Electron Ions

530 formula(e) evaluated with 2 results within limits (up to 4 best isotopic matches for each mass)

Elements Used:

C: 0-70 H: 0-80 N: 0-5 O: 0-10 Br: 0-1

A009-CPFC-1/019

UT0911\_195.23 (0.519) Cm (23:28-59:76x0.010)

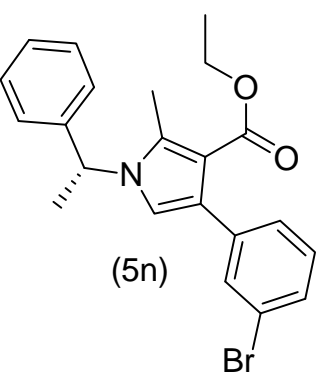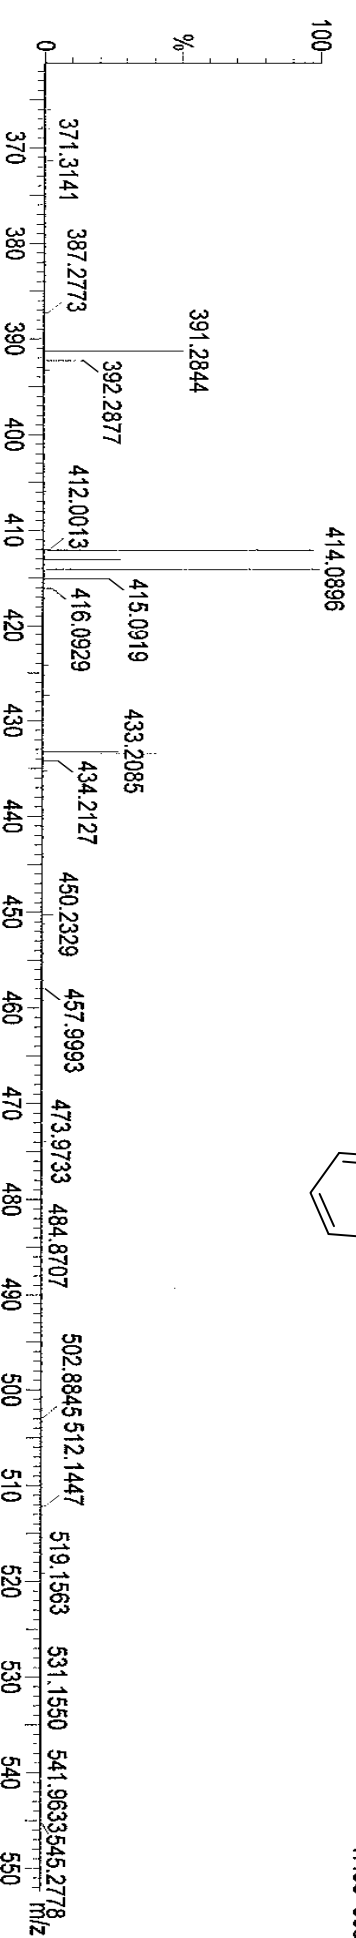

Minimum: 5.0  
Maximum: 5.0

0.0  
80.0

| Mass     | Calc. Mass | mDa | PPM | DBE  | i-FIT | Formula         |
|----------|------------|-----|-----|------|-------|-----------------|
| 412.0915 | 412.0912   | 0.3 | 0.7 | 11.5 | 2.7   | C22 H23 N O2 Br |

A009-CPFC-1-20 in CDCl<sub>3</sub>  
NMR-400MHz

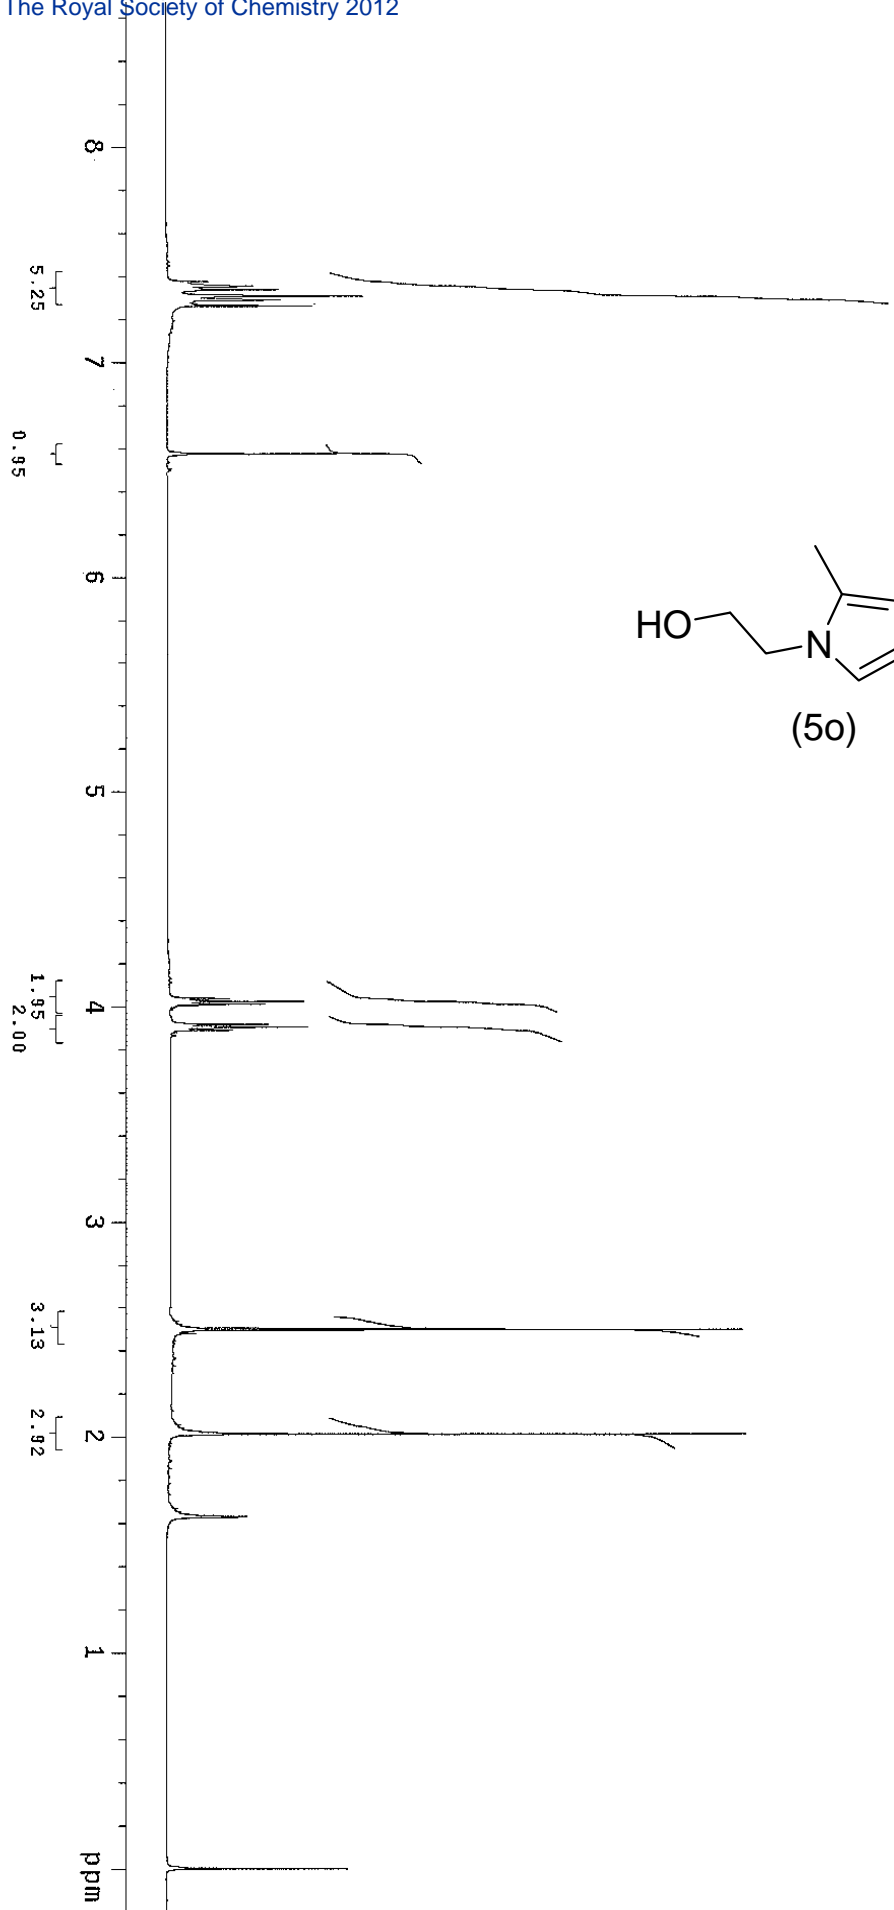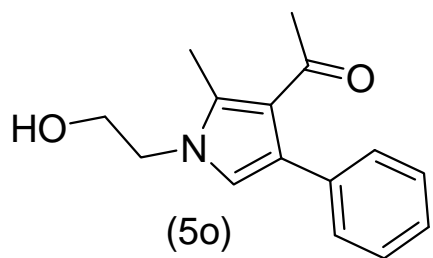

A009-CF-C-1-020 in CDCl<sub>3</sub>  
NMR-400MHZ

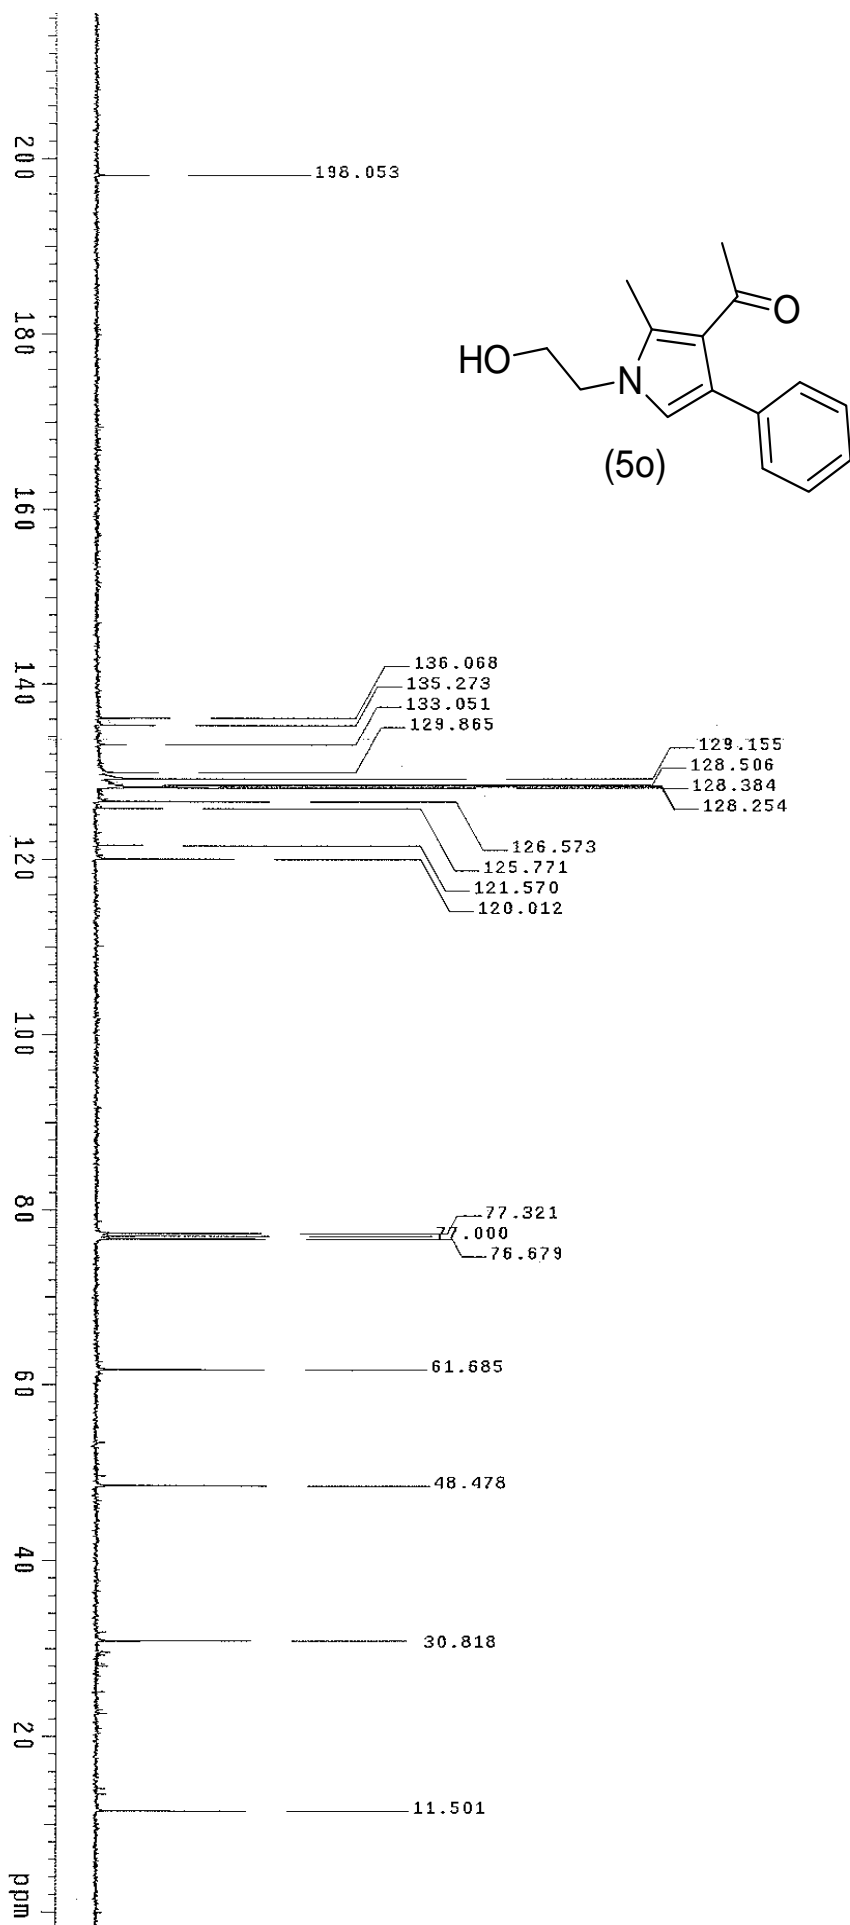

A009/CPFC-1-020

UT0911\_122 17 (0.472) Cm (17:21-52:59X0.010)  
244.1333

1: TOF MS ES+  
8.24e3

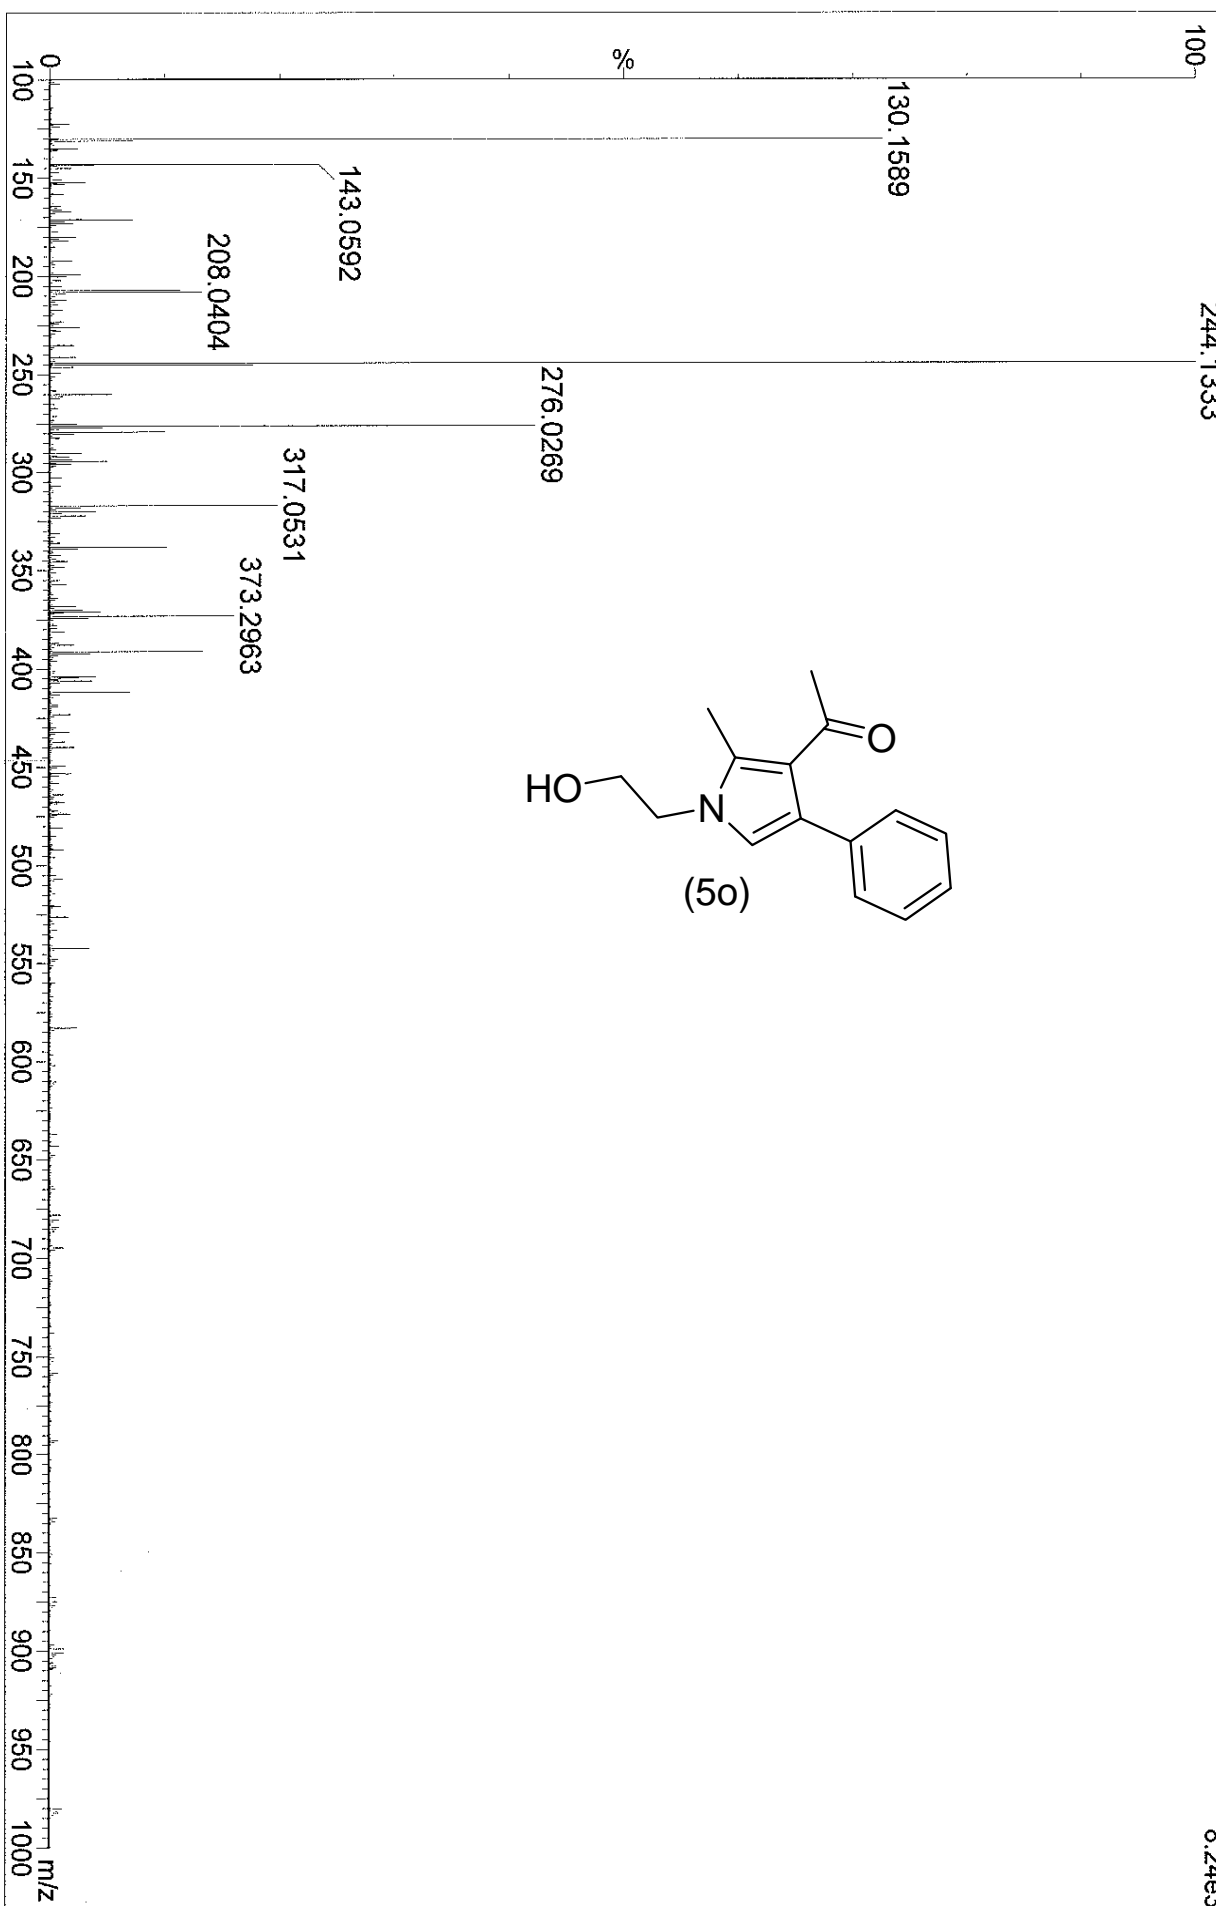

# Elemental Composition Report

## Single Mass Analysis

Tolerance = 5.0 PPM / DBE: min = 0.0, max = 80.0

Element prediction: Off

Number of isotope peaks used for i-FIT = 3

Monoisotopic Mass, Even Electron Ions

213 formula(e) evaluated with 1 results within limits (up to 4 best isotopic matches for each mass)

Elements Used:

C: 0-50 H: 0-65 N: 0-2 O: 0-4 F: 0-2 Br: 0-1

A009/CPFC-1-020

UT0911\_122 17 (0.472) Cm (17.21-52.59x0.010)

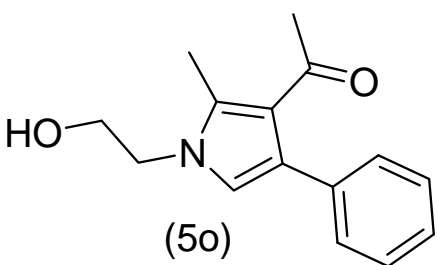

1: TOF MS ES+  
8.24e+003

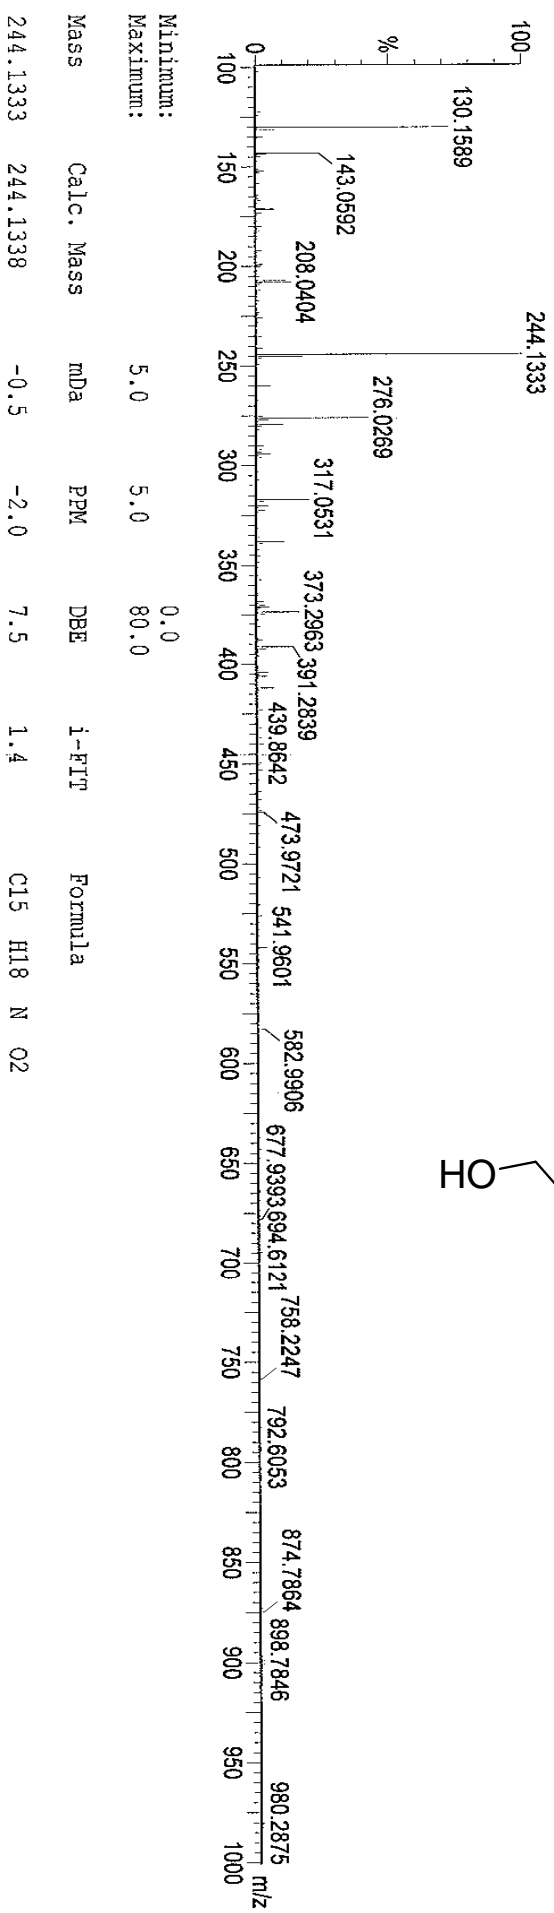

A009-CFEG-1-21 in CDCl<sub>3</sub>  
NMR-400

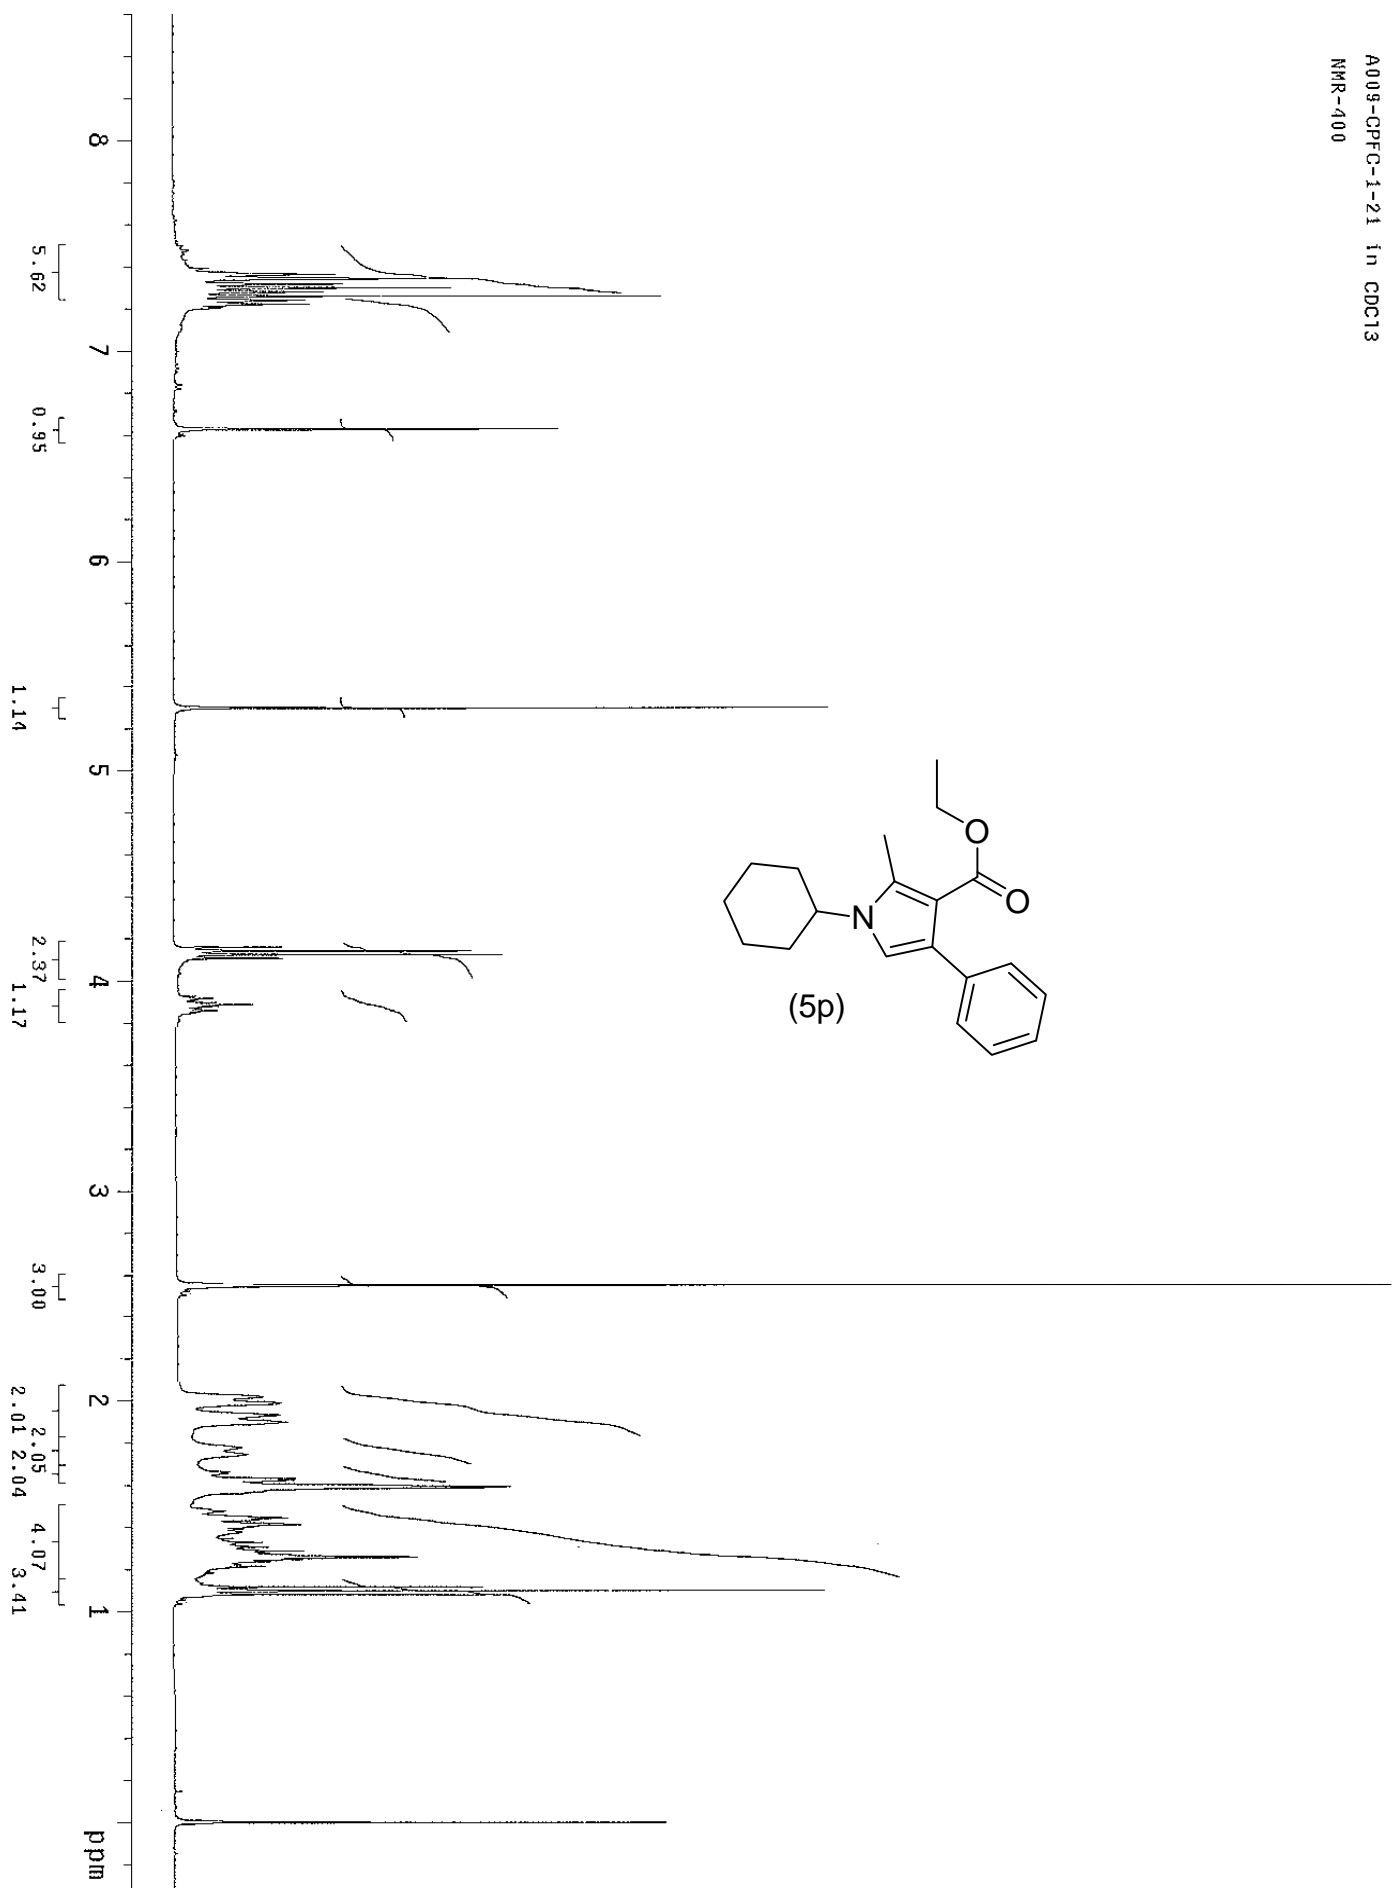

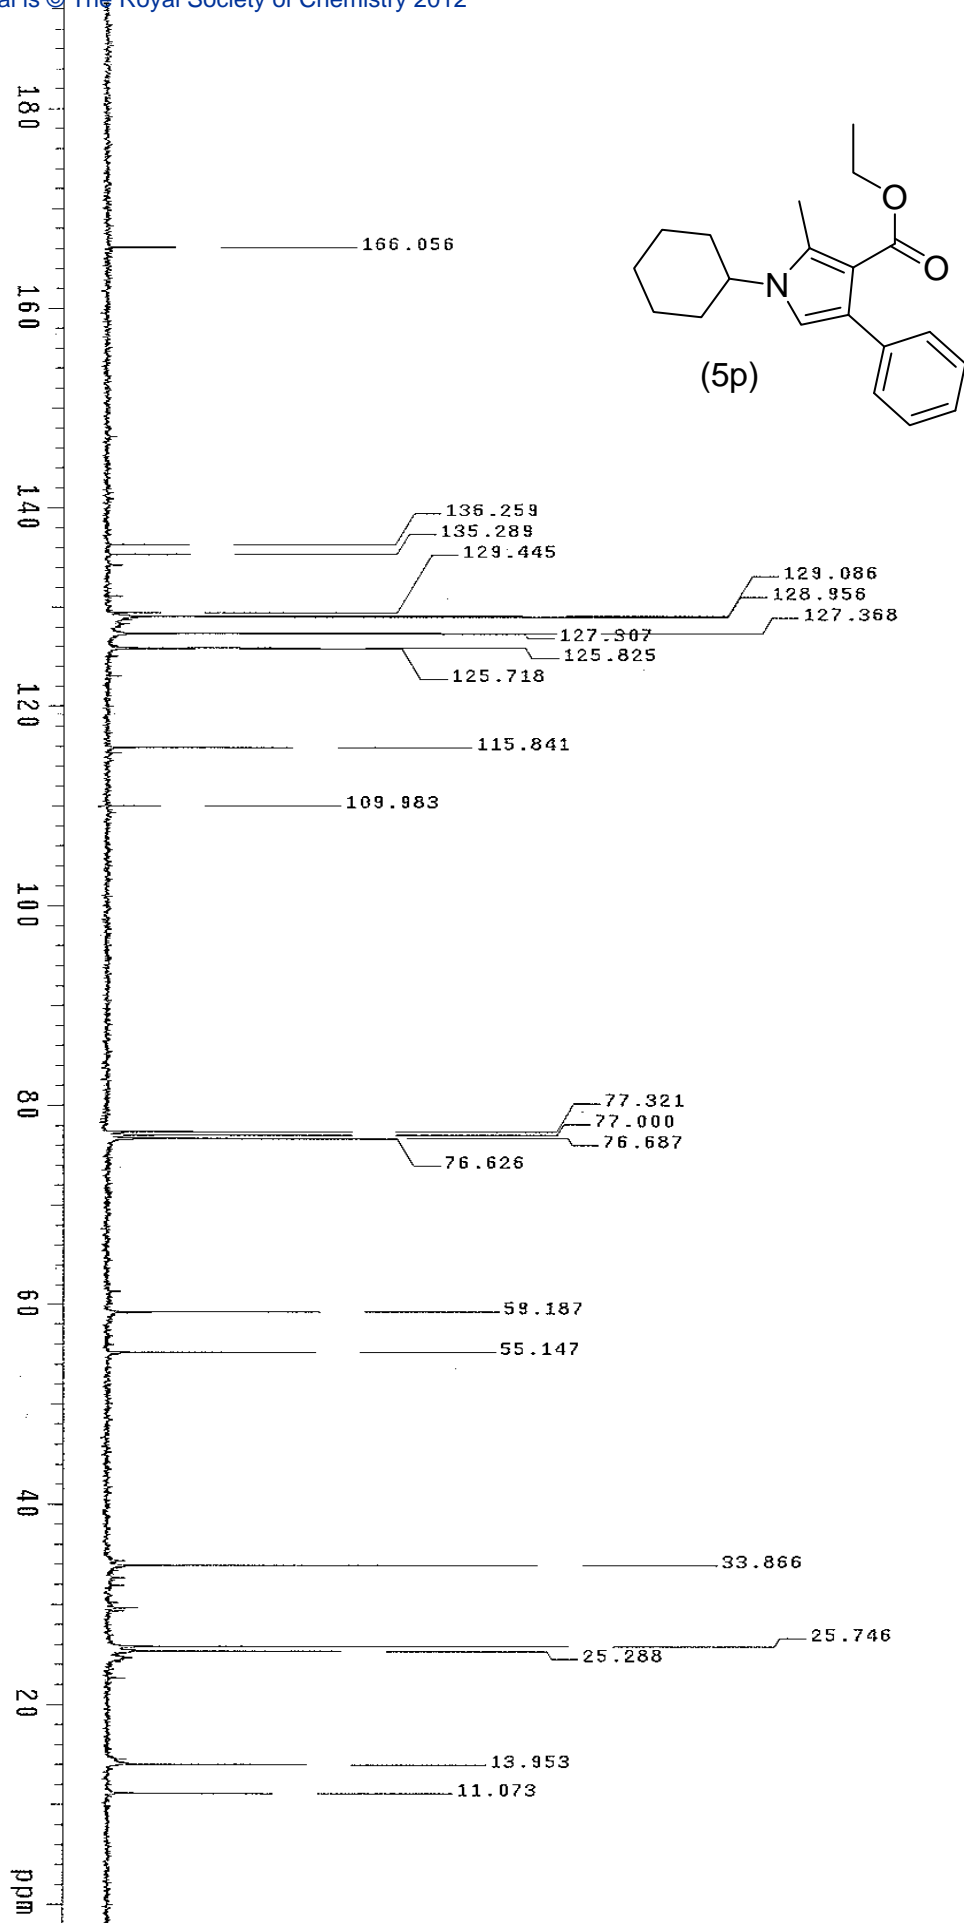

A009-CPFC-1/021

UT0911\_203 30 (0.688) Cm (29:32-65:76x0.010)  
312.1951

1: TOF MS ES+  
2.13e3

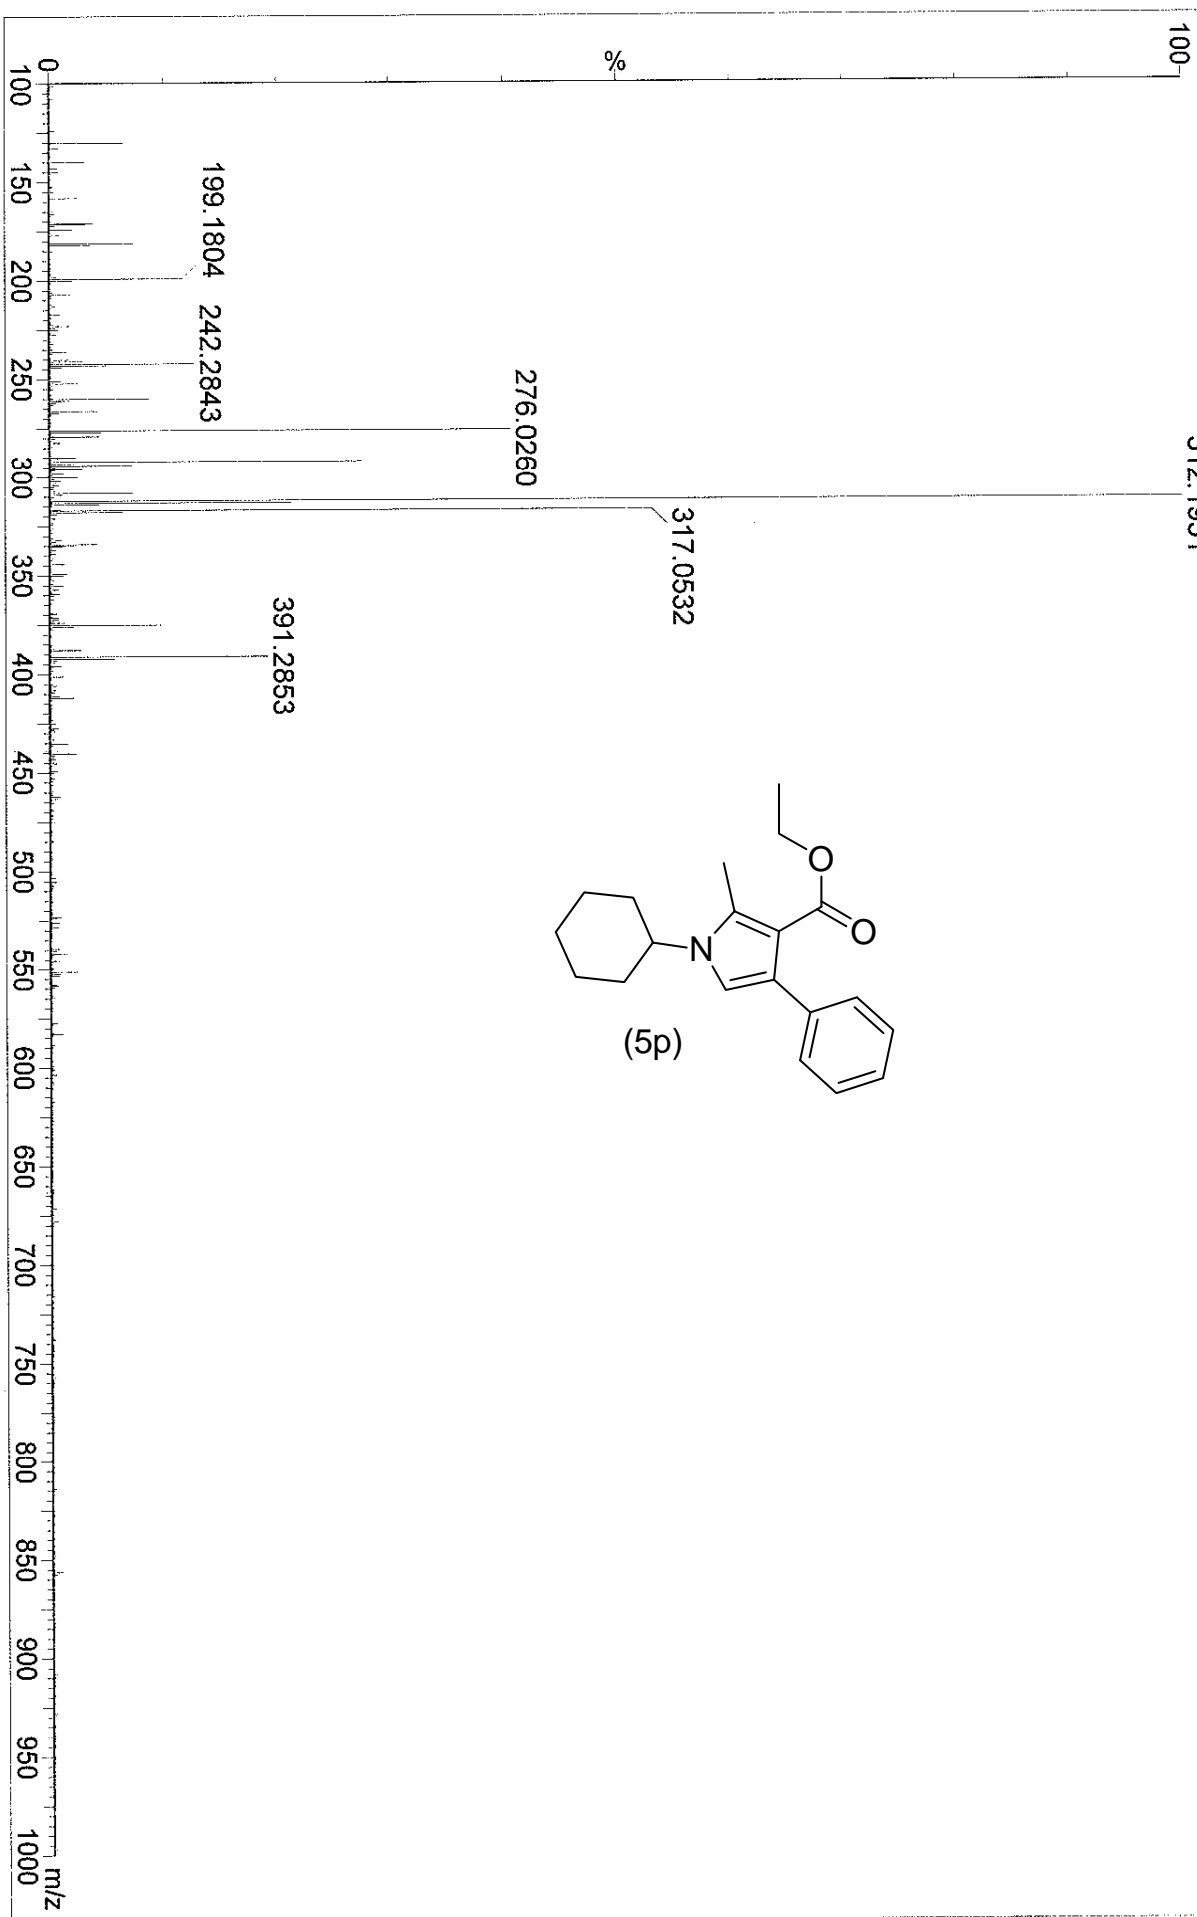



## Elemental Composition Report

### Single Mass Analysis

Tolerance = 5.0 PPM / DBE: min = 0.0, max = 80.0

Element prediction: Off

Number of isotope peaks used for i-FIT = 4

Monoisotopic Mass, Even Electron Ions

252 formula(e) evaluated with 1 results within limits (up to 4 best isotopic matches for each mass)

Elements Used:

C: 0-35 H: 0-55 N: 0-4 O: 0-6 F: 0-1

A009-CPFC-1/021

UT0911\_203 30 (0.688) Cm (29.32-65.76x0.010)

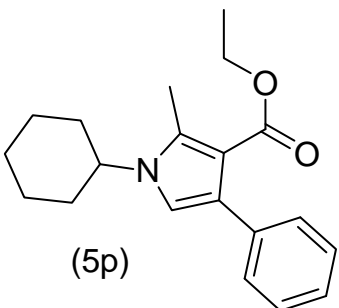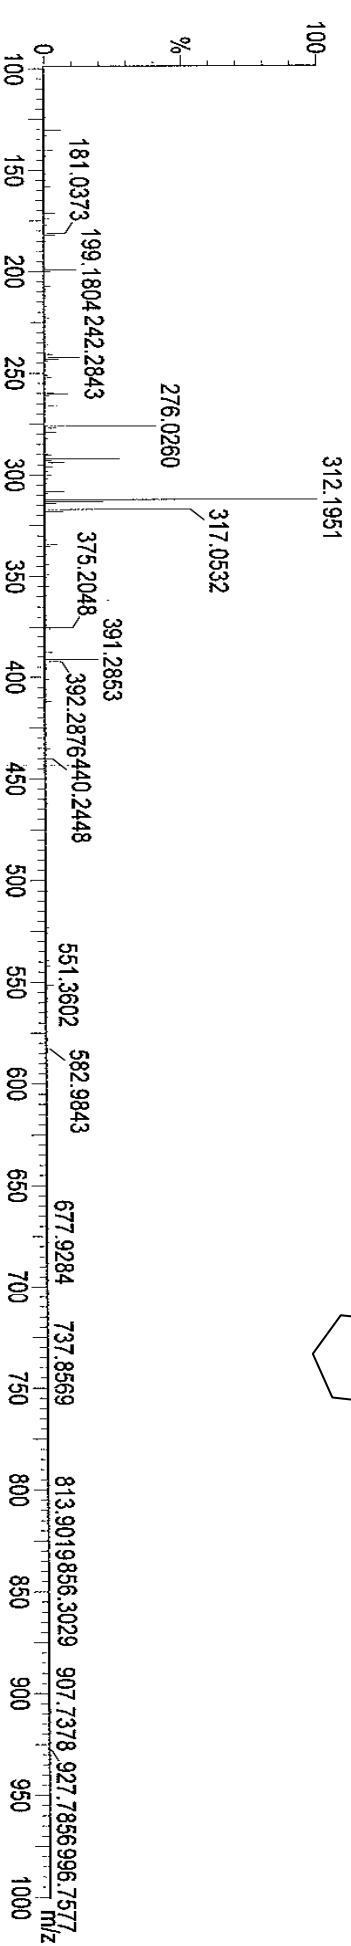

Minimum: 0.0

Maximum: 5.0 80.0

| Mass     | Calc. Mass | mDa  | PPM  | DBE | i-FIT | Formula      |
|----------|------------|------|------|-----|-------|--------------|
| 312.1951 | 312.1964   | -1.3 | -4.2 | 8.5 | 7.7   | C20 H26 N O2 |

1: TOF MS ES+  
2.13e+003

A009-CFSU-4-016 in CDCl3  
NMR-400MHZ

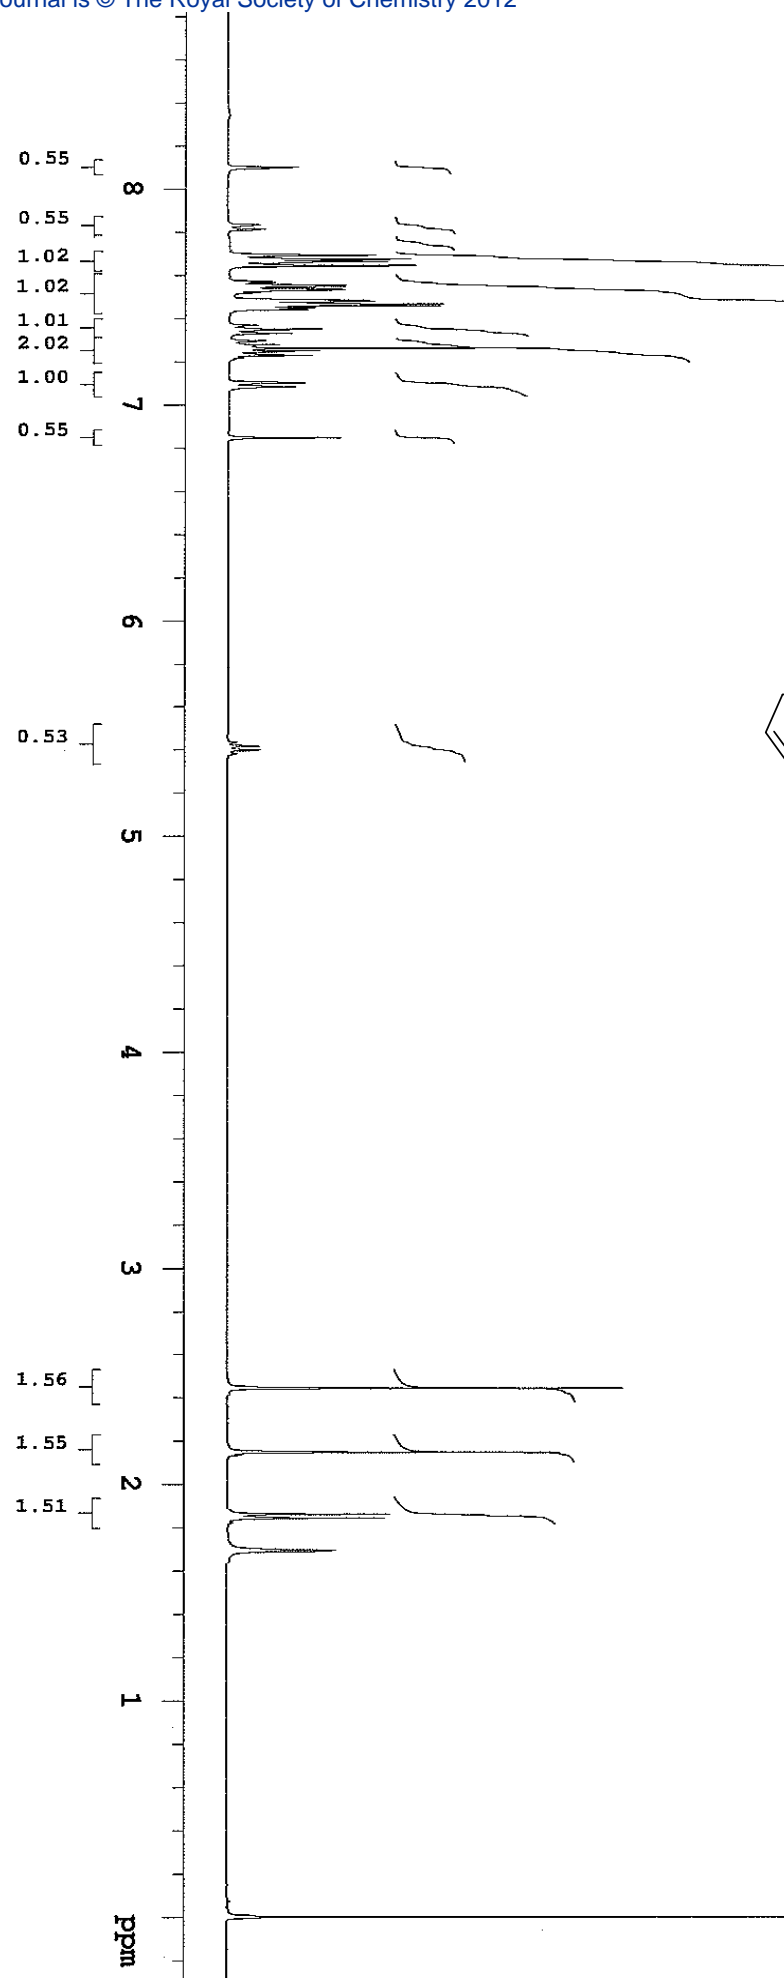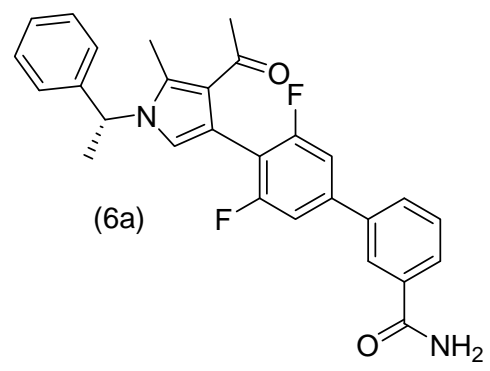

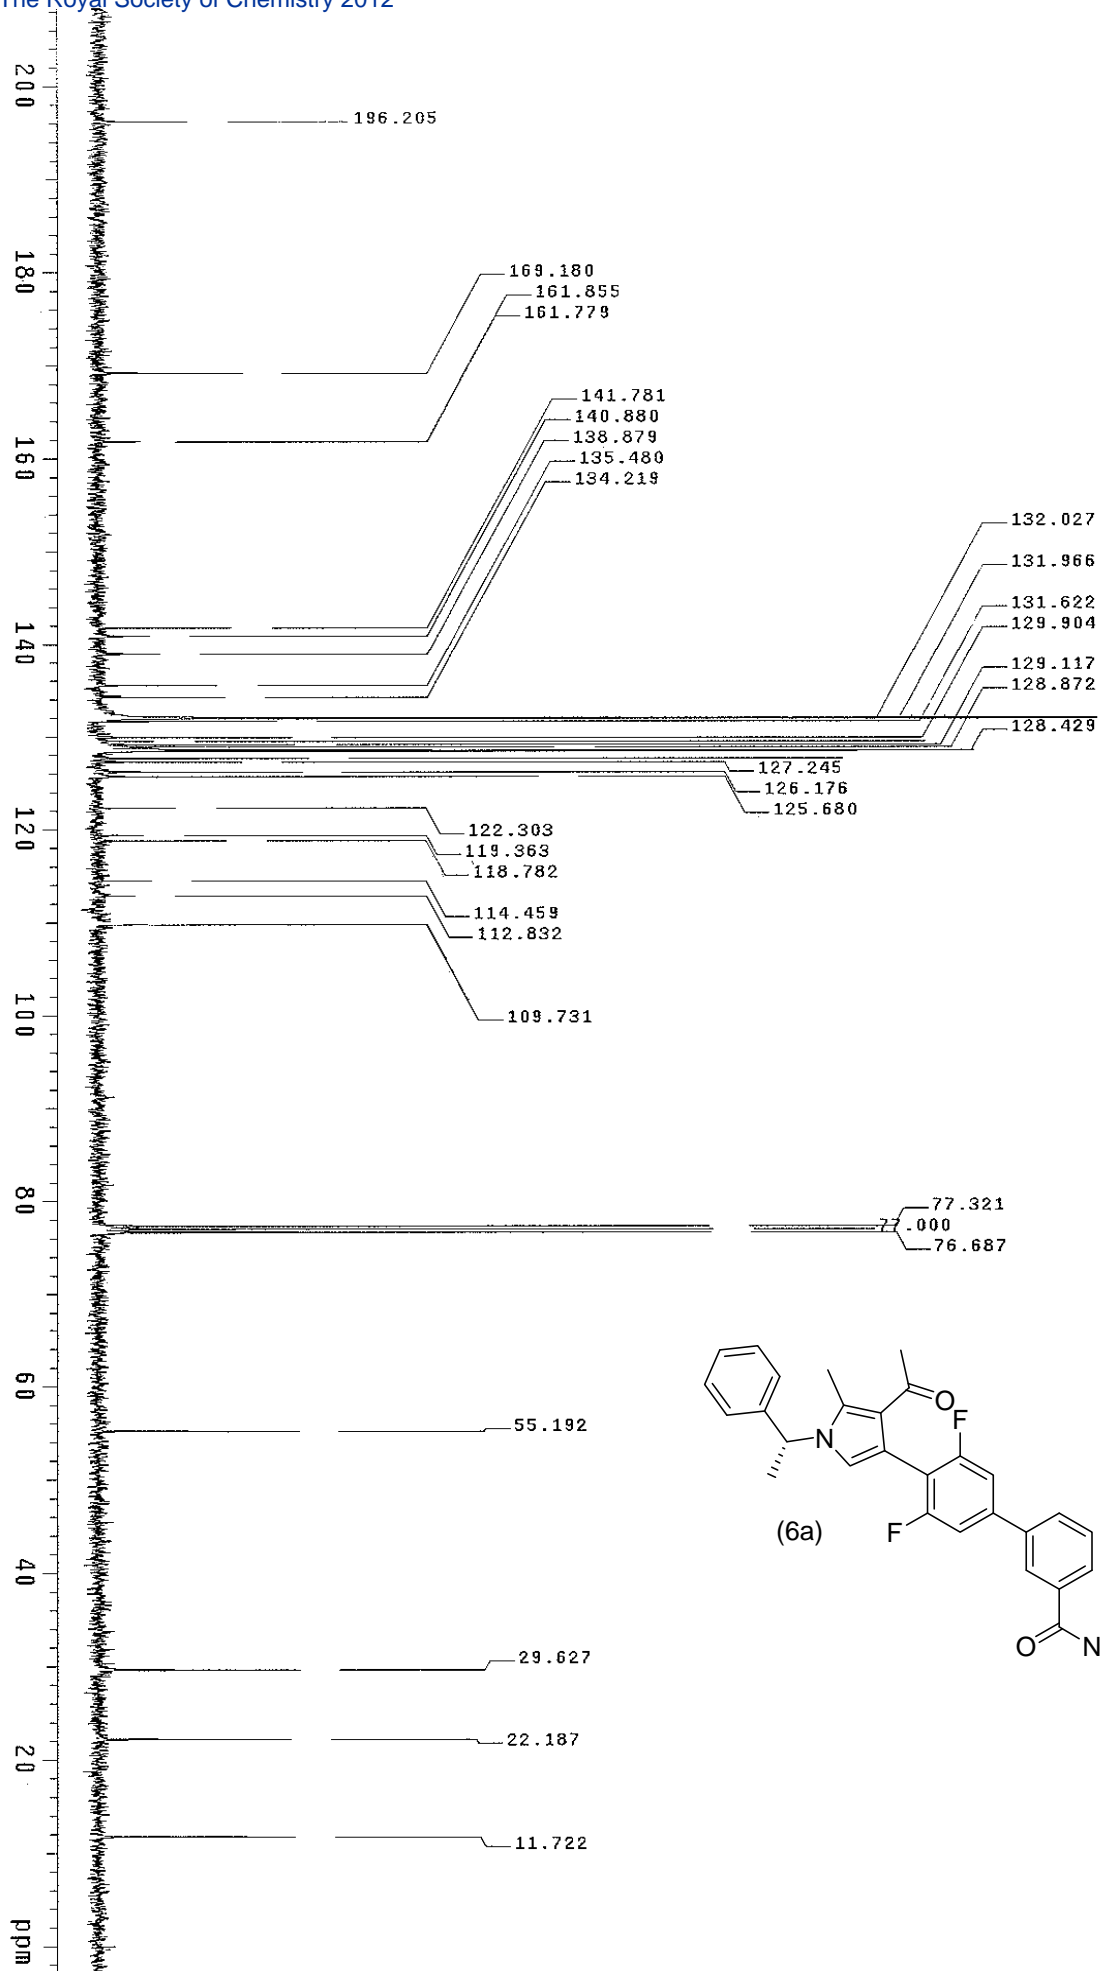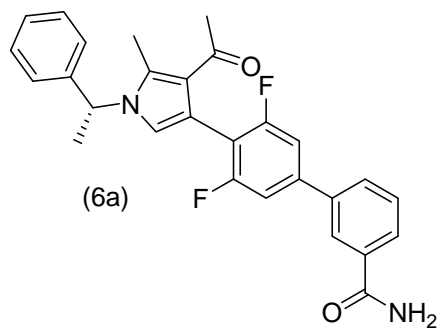

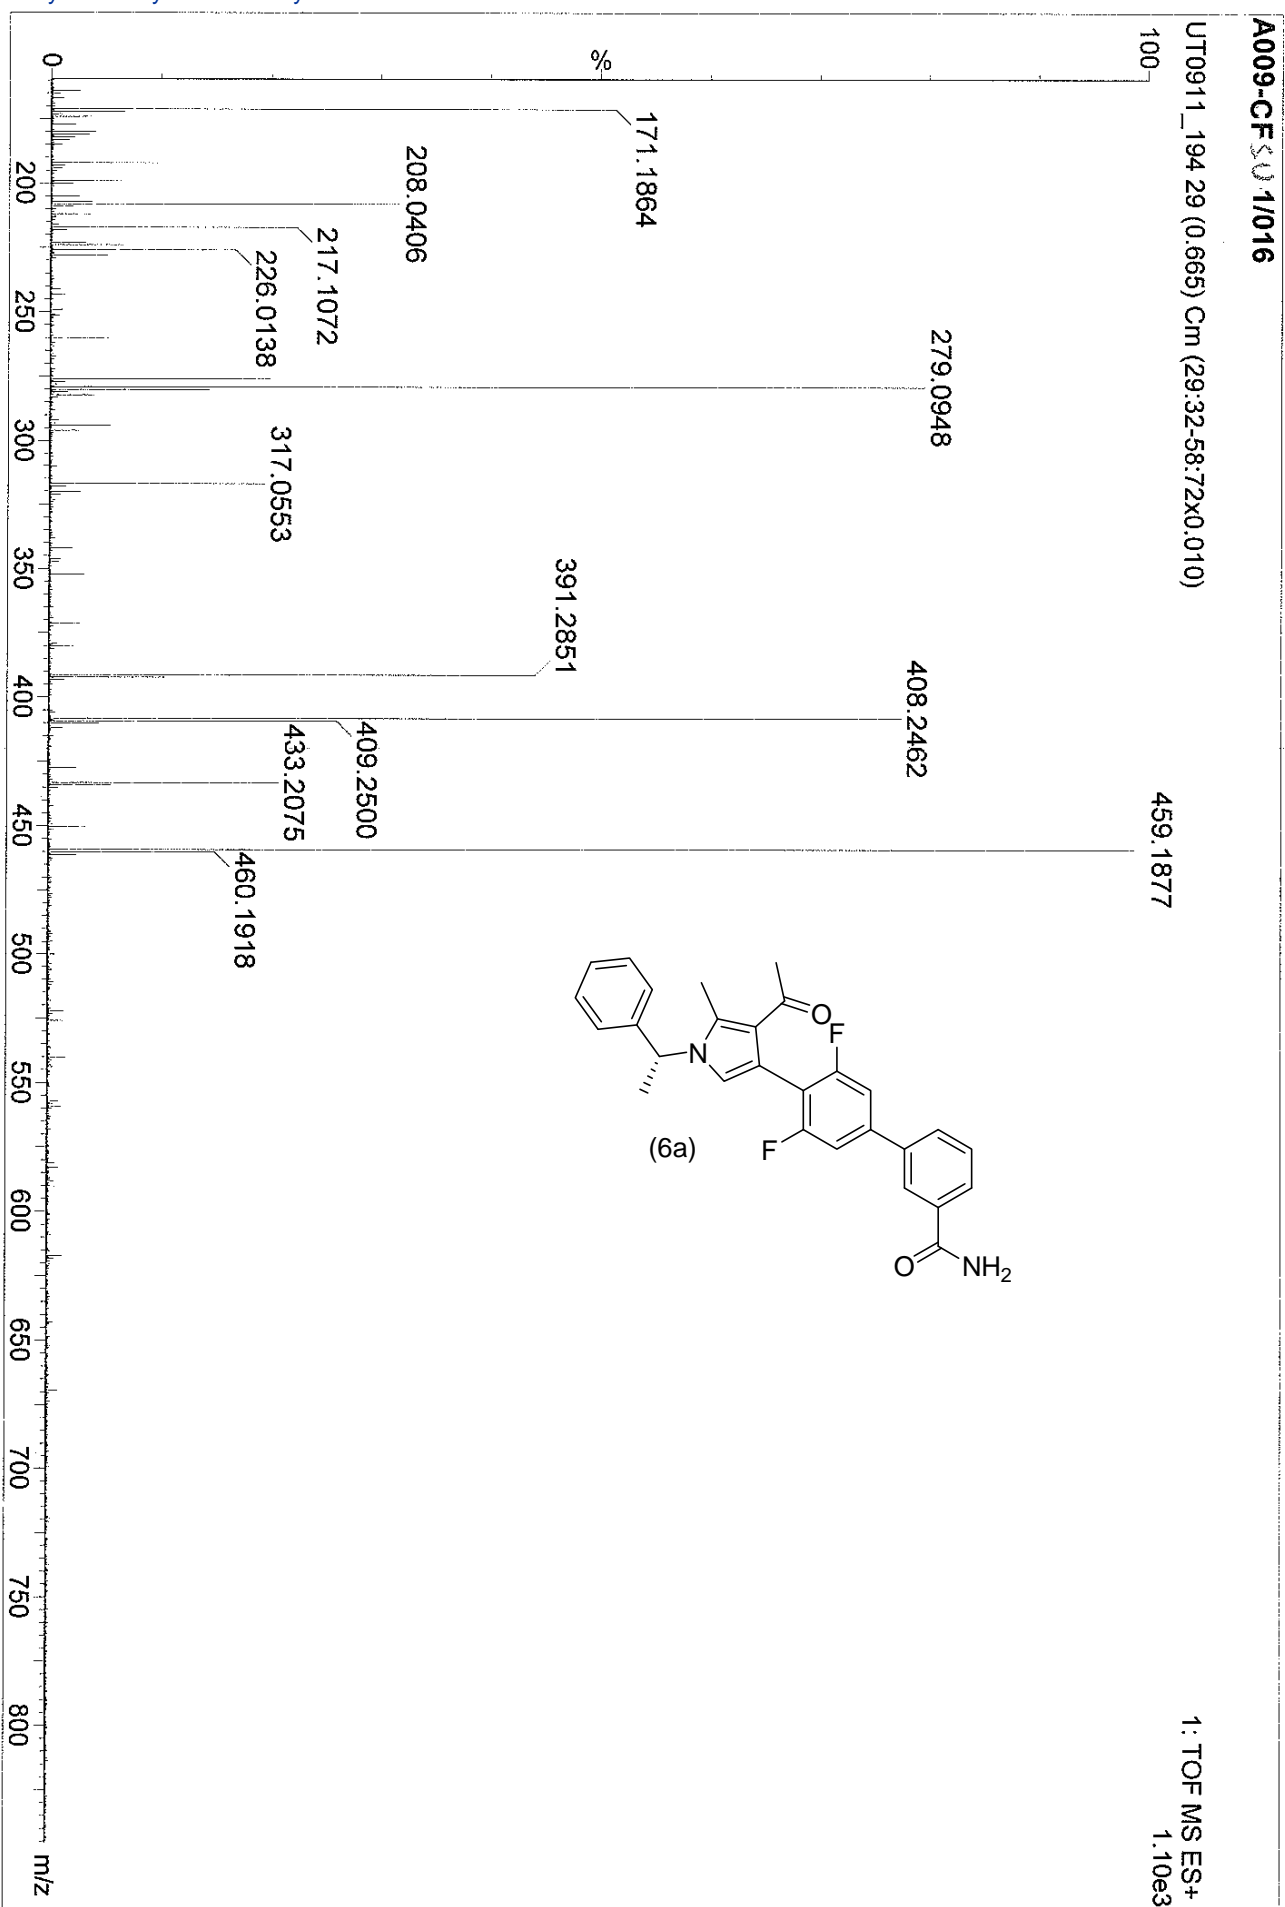

# Elemental Composition Report

## Single Mass Analysis

Tolerance = 5.0 PPM / DBE: min = 0.0, max = 80.0

Element prediction: Off

Number of isotope peaks used for i-FIT = 4

Monoisotopic Mass, Even Electron Ions

296 formula(e) evaluated with 1 results within limits (up to 4 best isotopic matches for each mass)

Elements Used:

C: 0-70 H: 0-80 N: 0-5 O: 0-10 F: 2-2

A009-CFSU-1/016

UT0911\_19429 (0.665) Cm (29:32:58:72x0.010)

1: TOF MS ES+  
1.10e+003

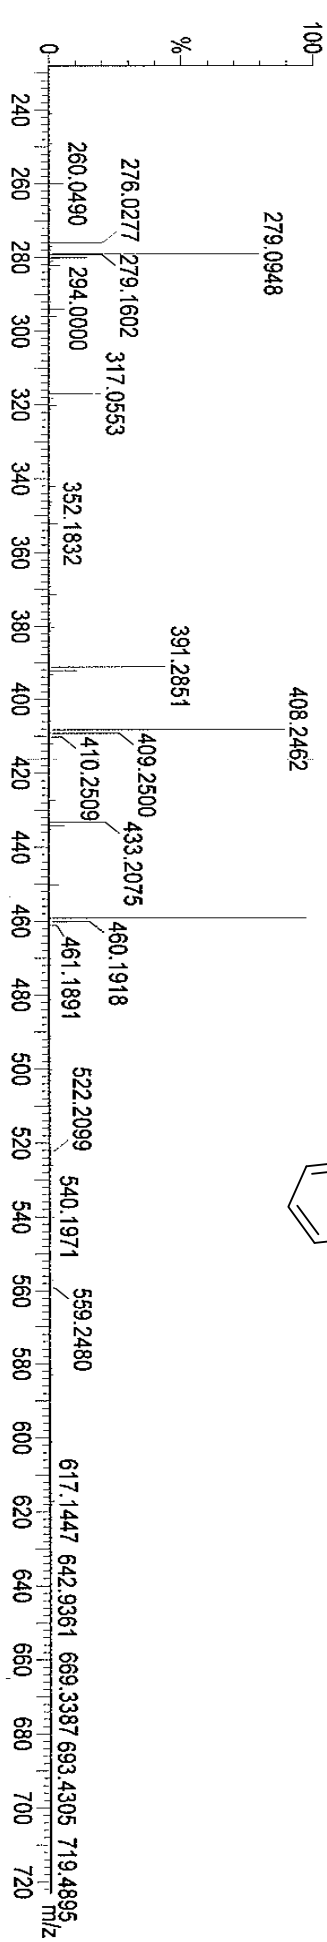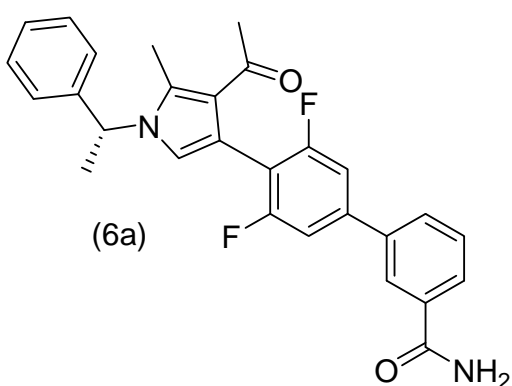

| Mass     | Calc. Mass | mDa  | PPM  | DBE  | i-FIT | Formula          |
|----------|------------|------|------|------|-------|------------------|
| 459.1877 | 459.1884   | -0.7 | -1.5 | 16.5 | 1.8   | C28 H25 N2 O2 F2 |

Minimum: 0.0  
Maximum: 5.0

A009-CFSU-3-017 in CDCl<sub>3</sub>  
NMR-400

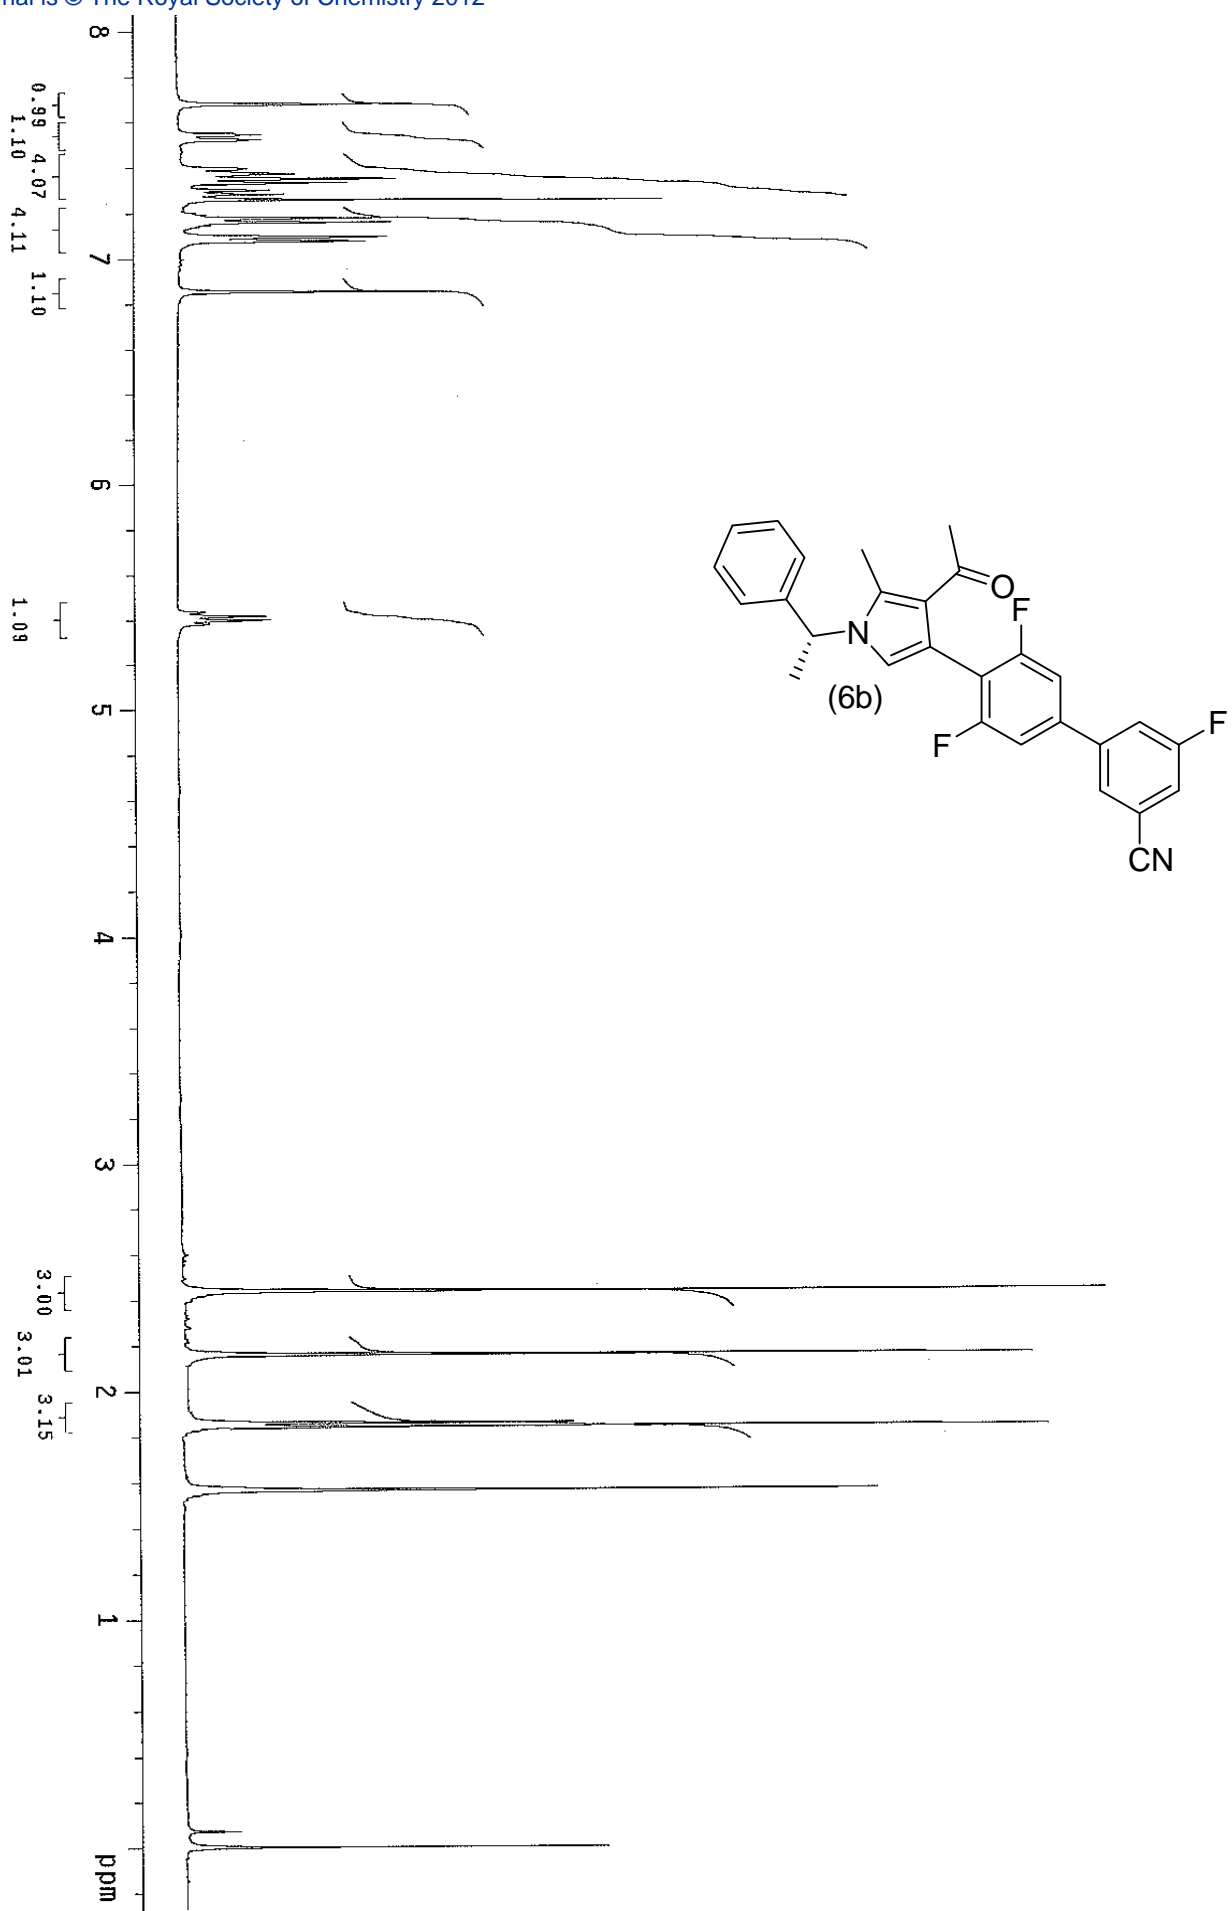

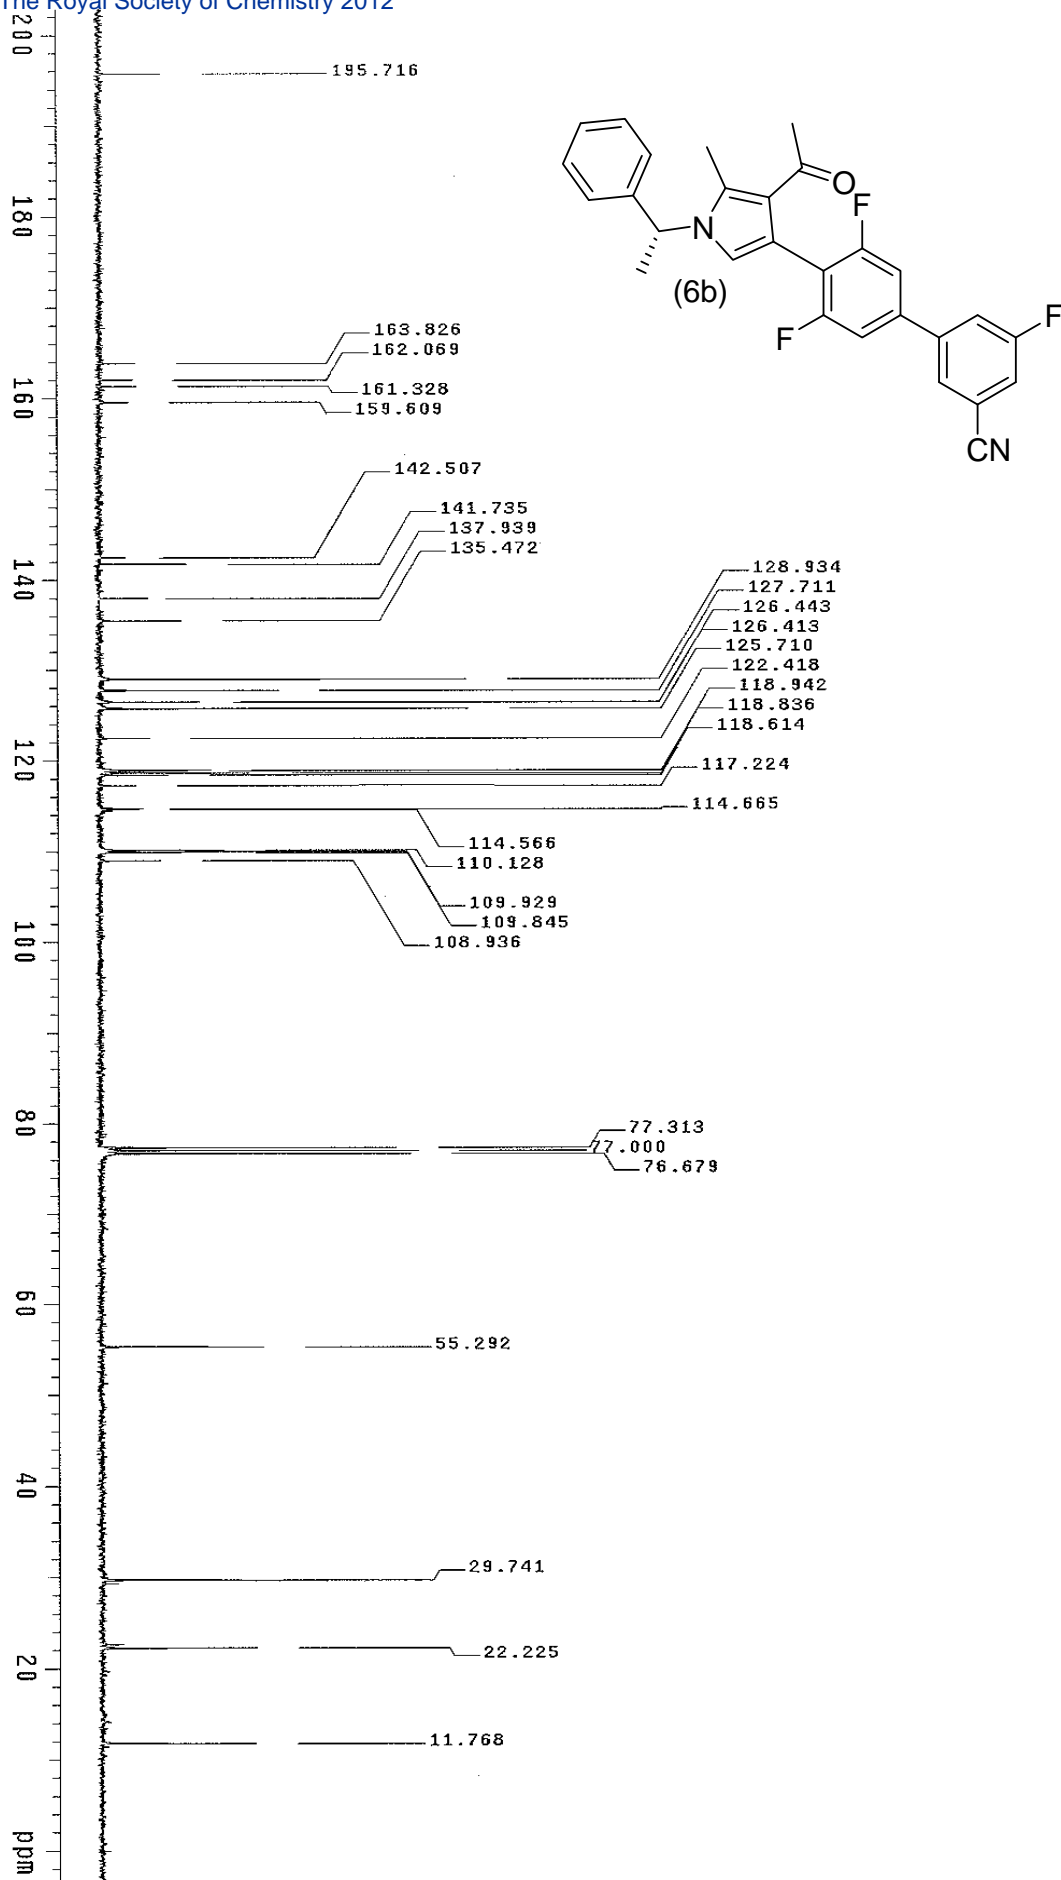

A009-CFSU-3-017 in CDCl<sub>3</sub>  
NMR-400

A009-CF5U-1/017

UT0911\_205 27 (0.610) Cm (26:29:69:80x0.010)

459.1680

1: TOF MS ES+  
933

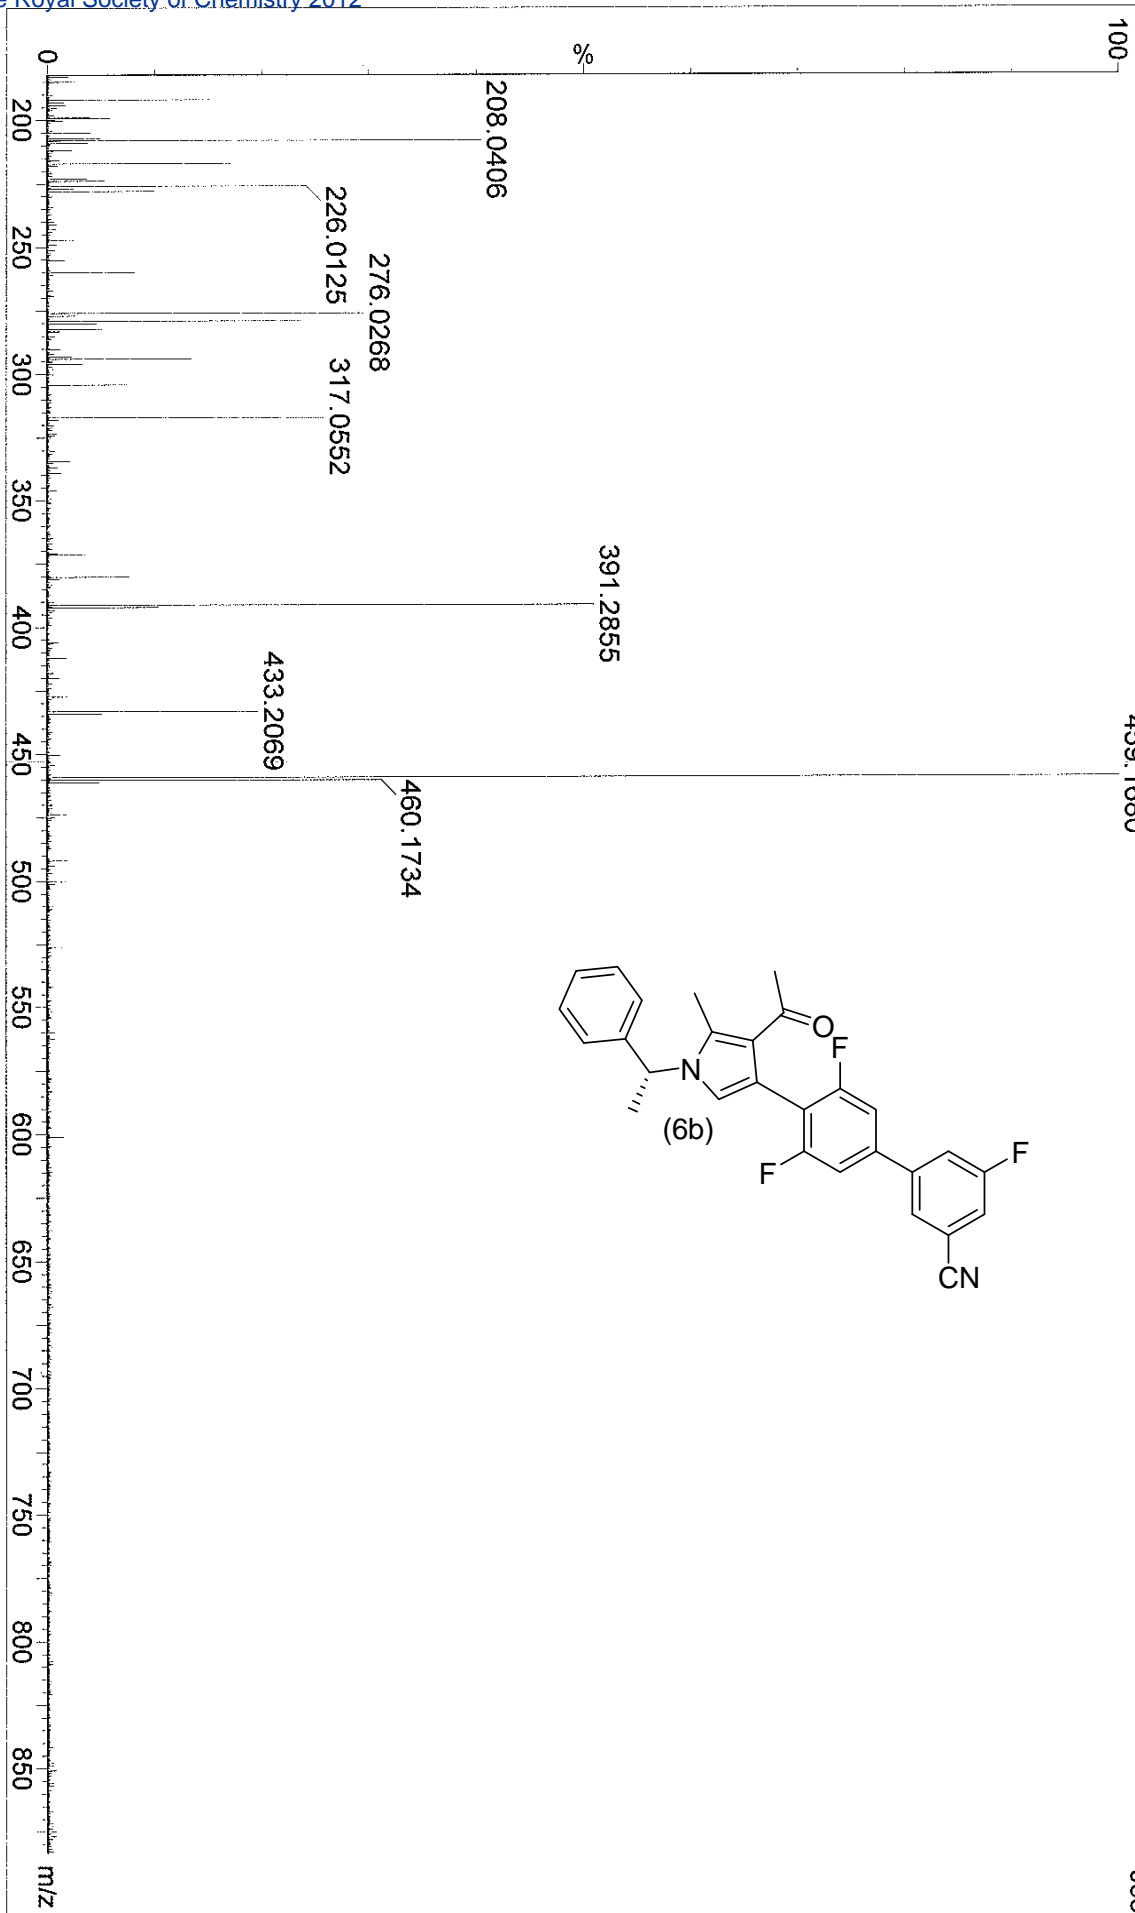



## Elemental Composition Report

### Single Mass Analysis

Tolerance = 5.0 PPM / DBE: min = 0.0, max = 80.0

Element prediction: Off

Number of isotope peaks used for i-FIT = 4

Monoisotopic Mass, Even Electron Ions

276 formula(e) evaluated with 2 results within limits (up to 4 best isotopic matches for each mass)

Elements Used:

C: 0-35 H: 0-55 N: 0-4 O: 0-2 F: 0-3

A009-CFSU-1/017

UT0911\_205 27 (0.610) Cm (26:29-69:80x0.010)

1: TOF MS ES+  
9.33e+002

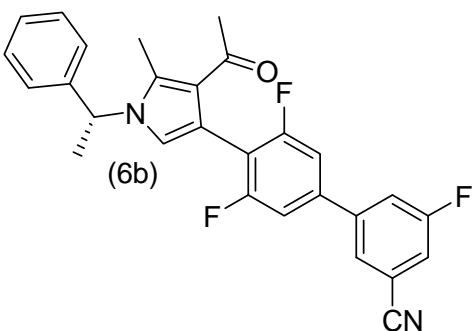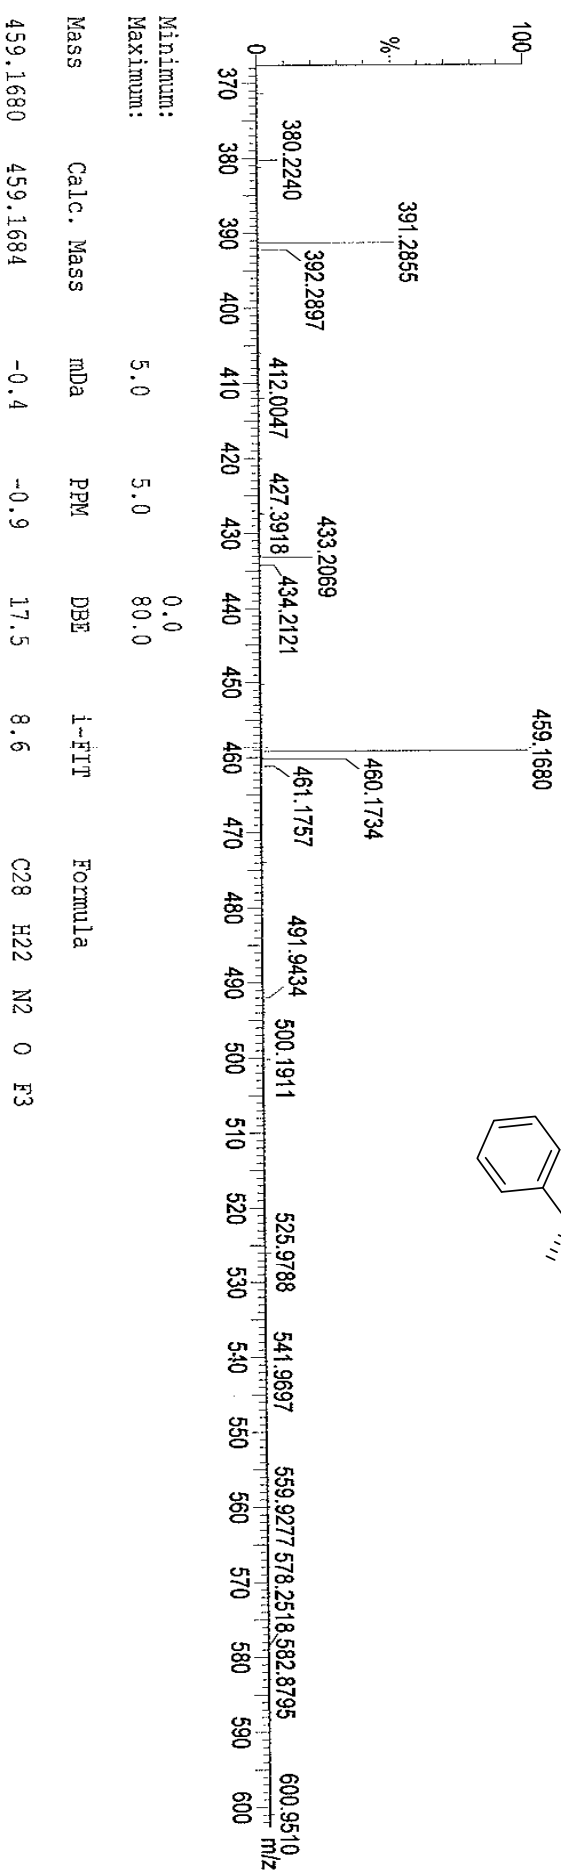

A009-CFSU-3-015 in CDCl<sub>3</sub>  
NMR-400

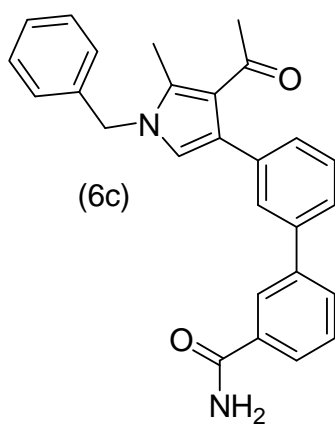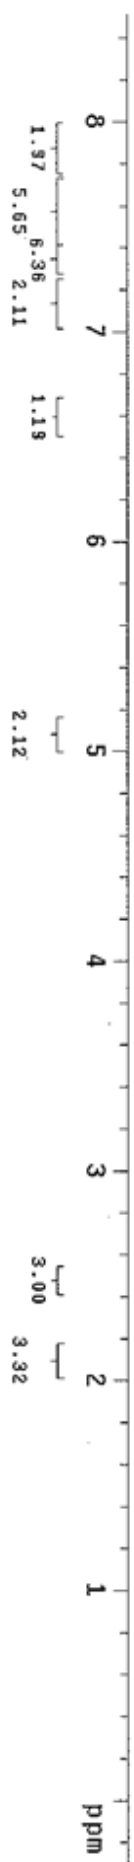

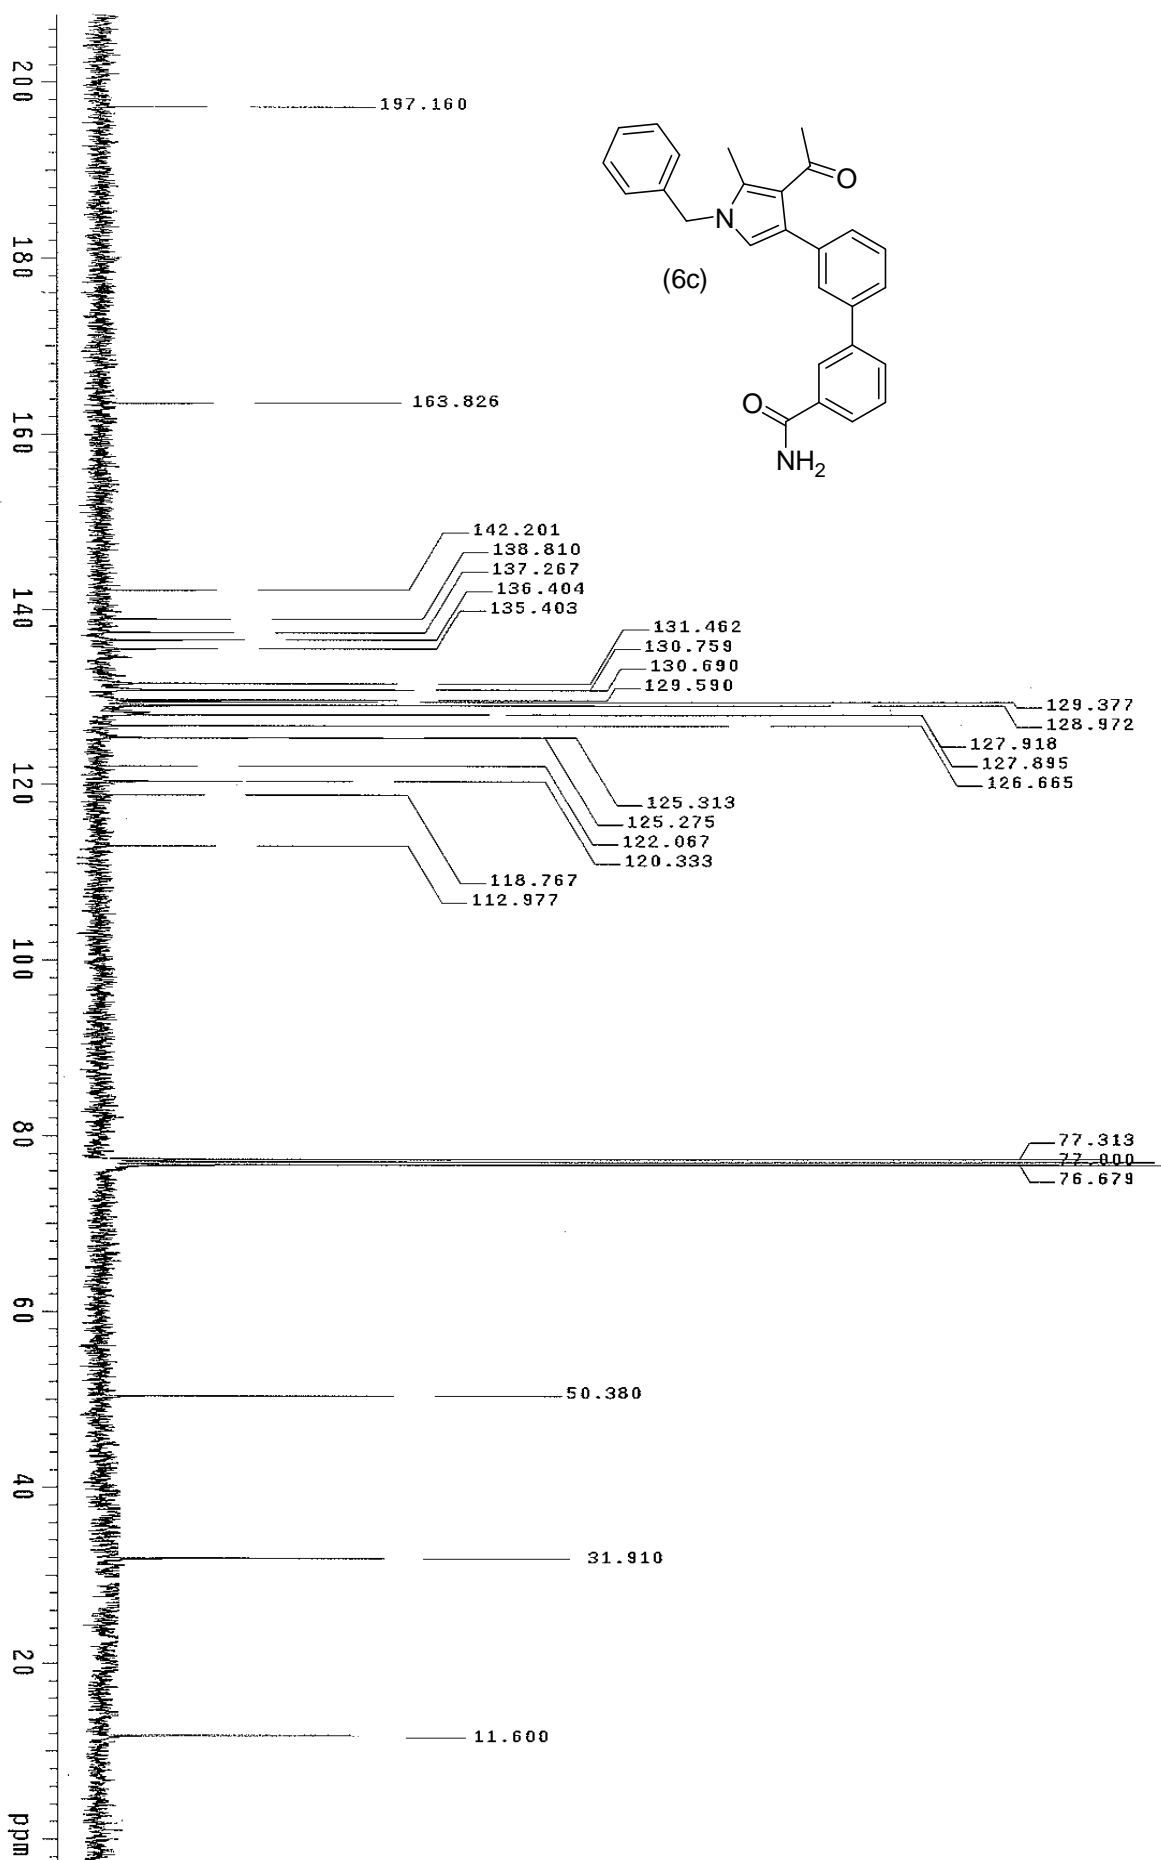

A009-CFSU-3-015 in CDCl<sub>3</sub>  
NMR-400

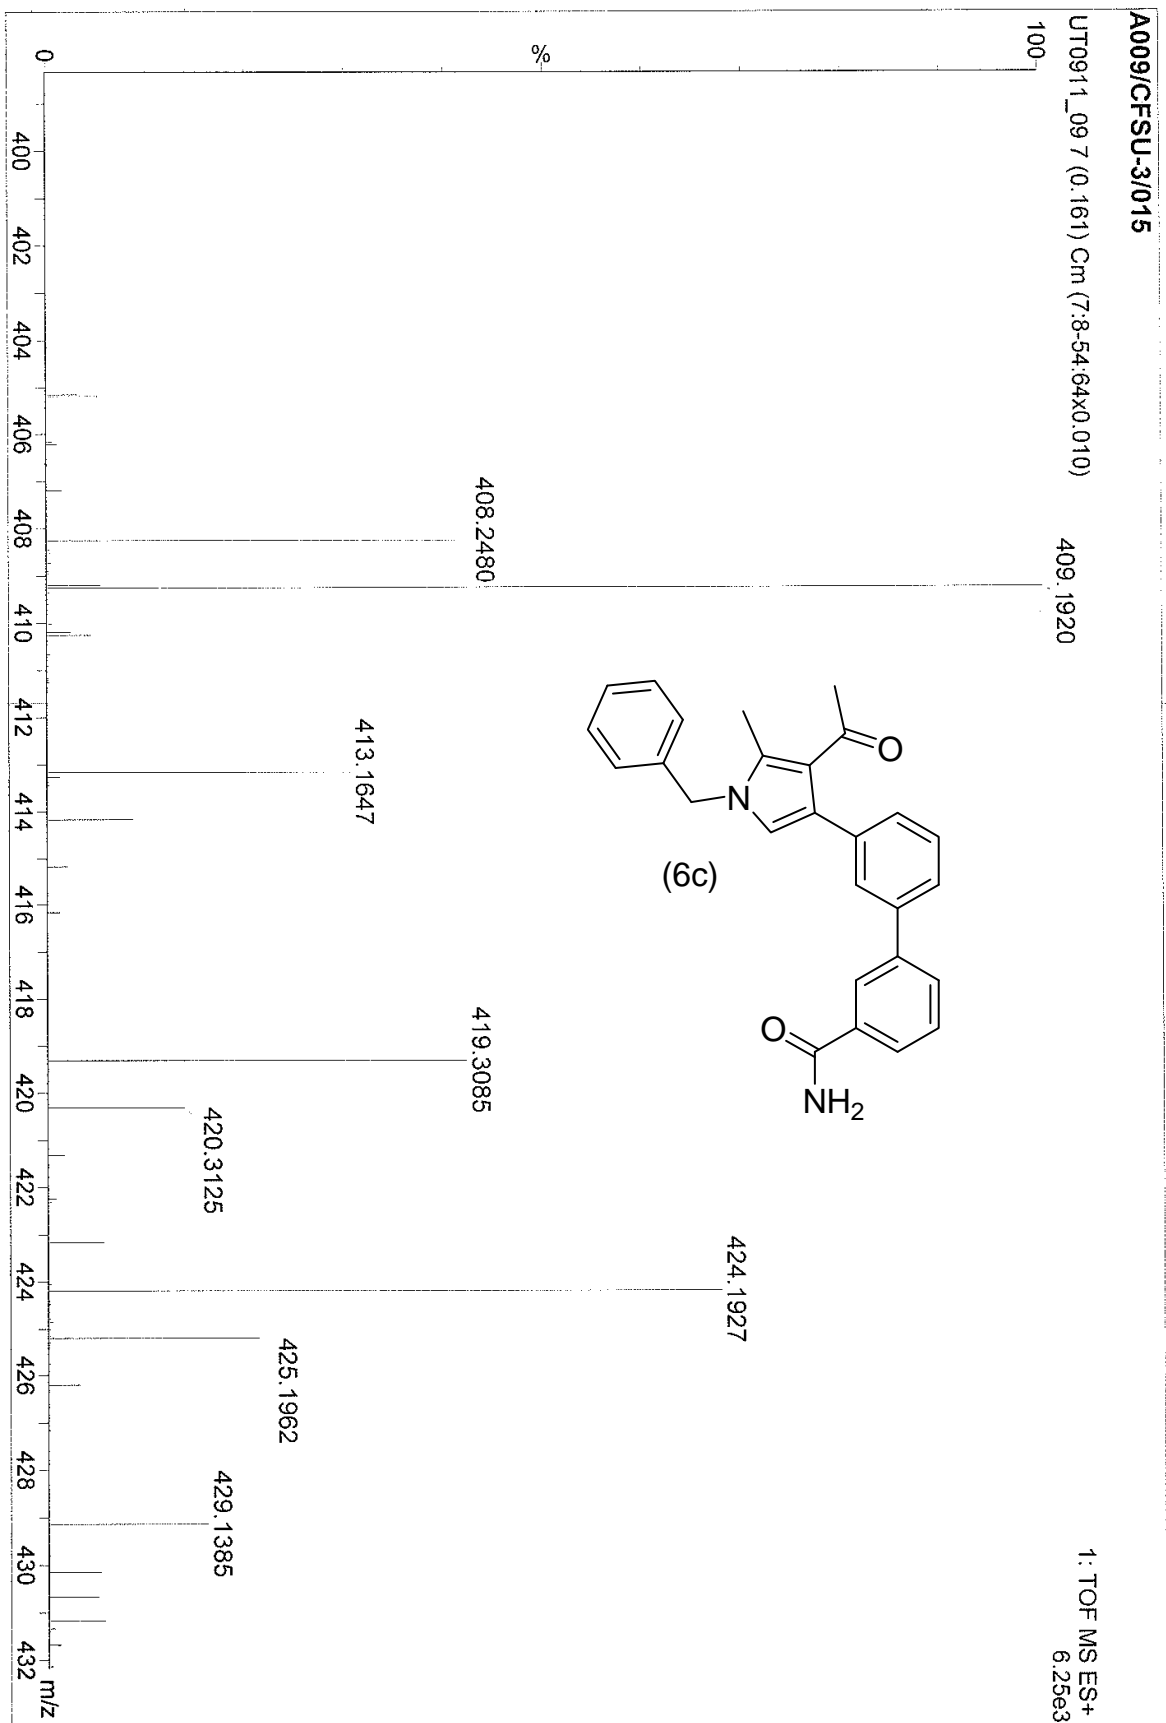

## Elemental Composition Report

### Single Mass Analysis

Tolerance = 5.0 PPM / DBE: min = 0.0, max = 80.0

Element prediction: Off

Number of isotope peaks used for i-FIT = 4

Monoisotopic Mass, Even Electron Ions

120 formula(e) evaluated with 1 results within limits (up to 4 best isotopic matches for each mass)

Elements Used:

C: 0-35 H: 0-45 N: 0-4 O: 0-5

A009/CFSU-3/015

UT0911\_09 5 (0.127) Cm (5:8-69:83x0.010)

1: TOF MS ES+  
3.52e+004

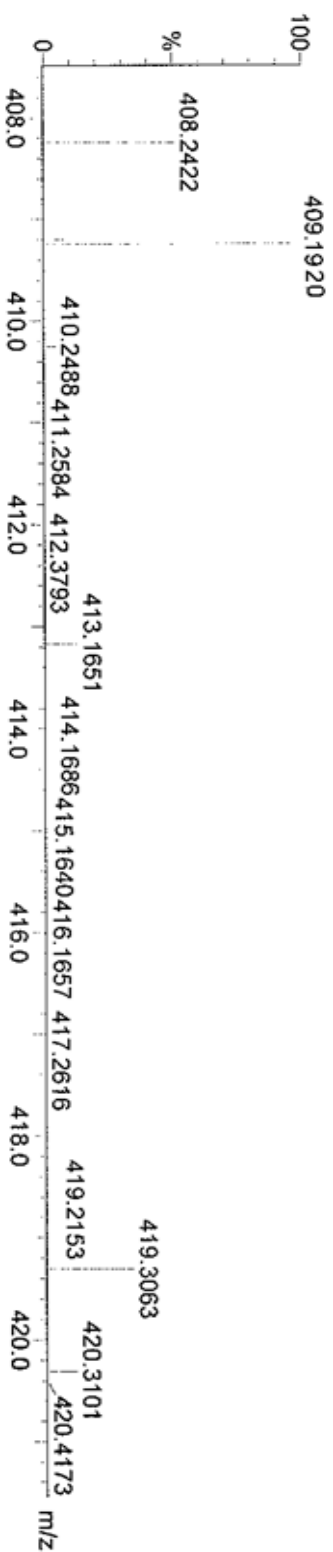

Minimum: 5.0  
Maximum: 5.0

| Mass     | Calc. Mass | mDa  | PPM  | DBE  | i-FIT | Formula       |
|----------|------------|------|------|------|-------|---------------|
| 409.1920 | 409.1991   | -1.4 | -3.4 | 10.5 | 391.0 | C27 H25 N2 O2 |

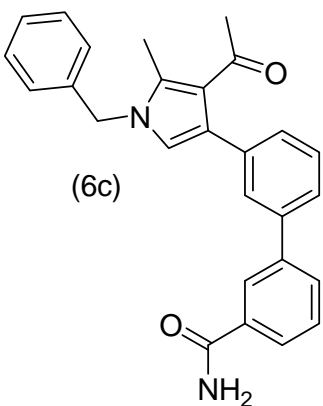

A009-CFSU-4-018 in CDCl<sub>3</sub>  
NMR-400

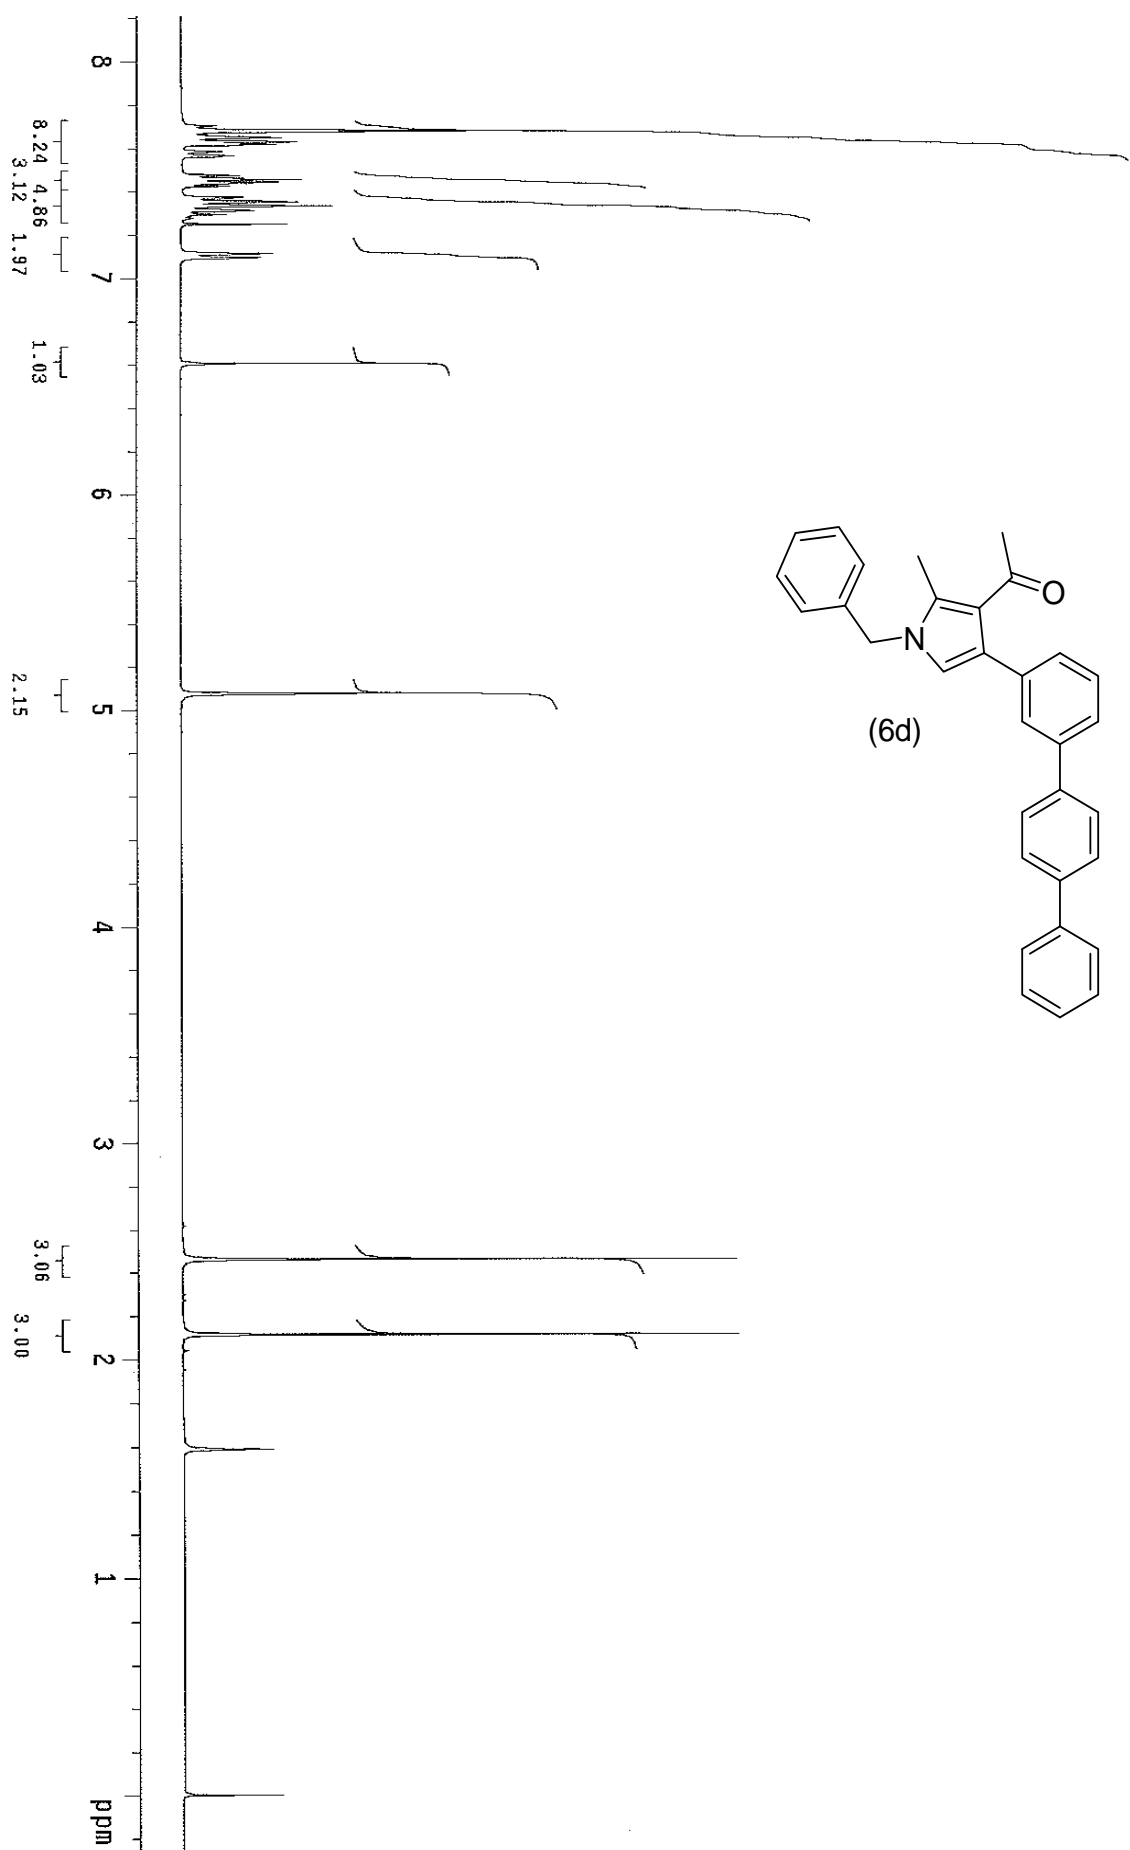

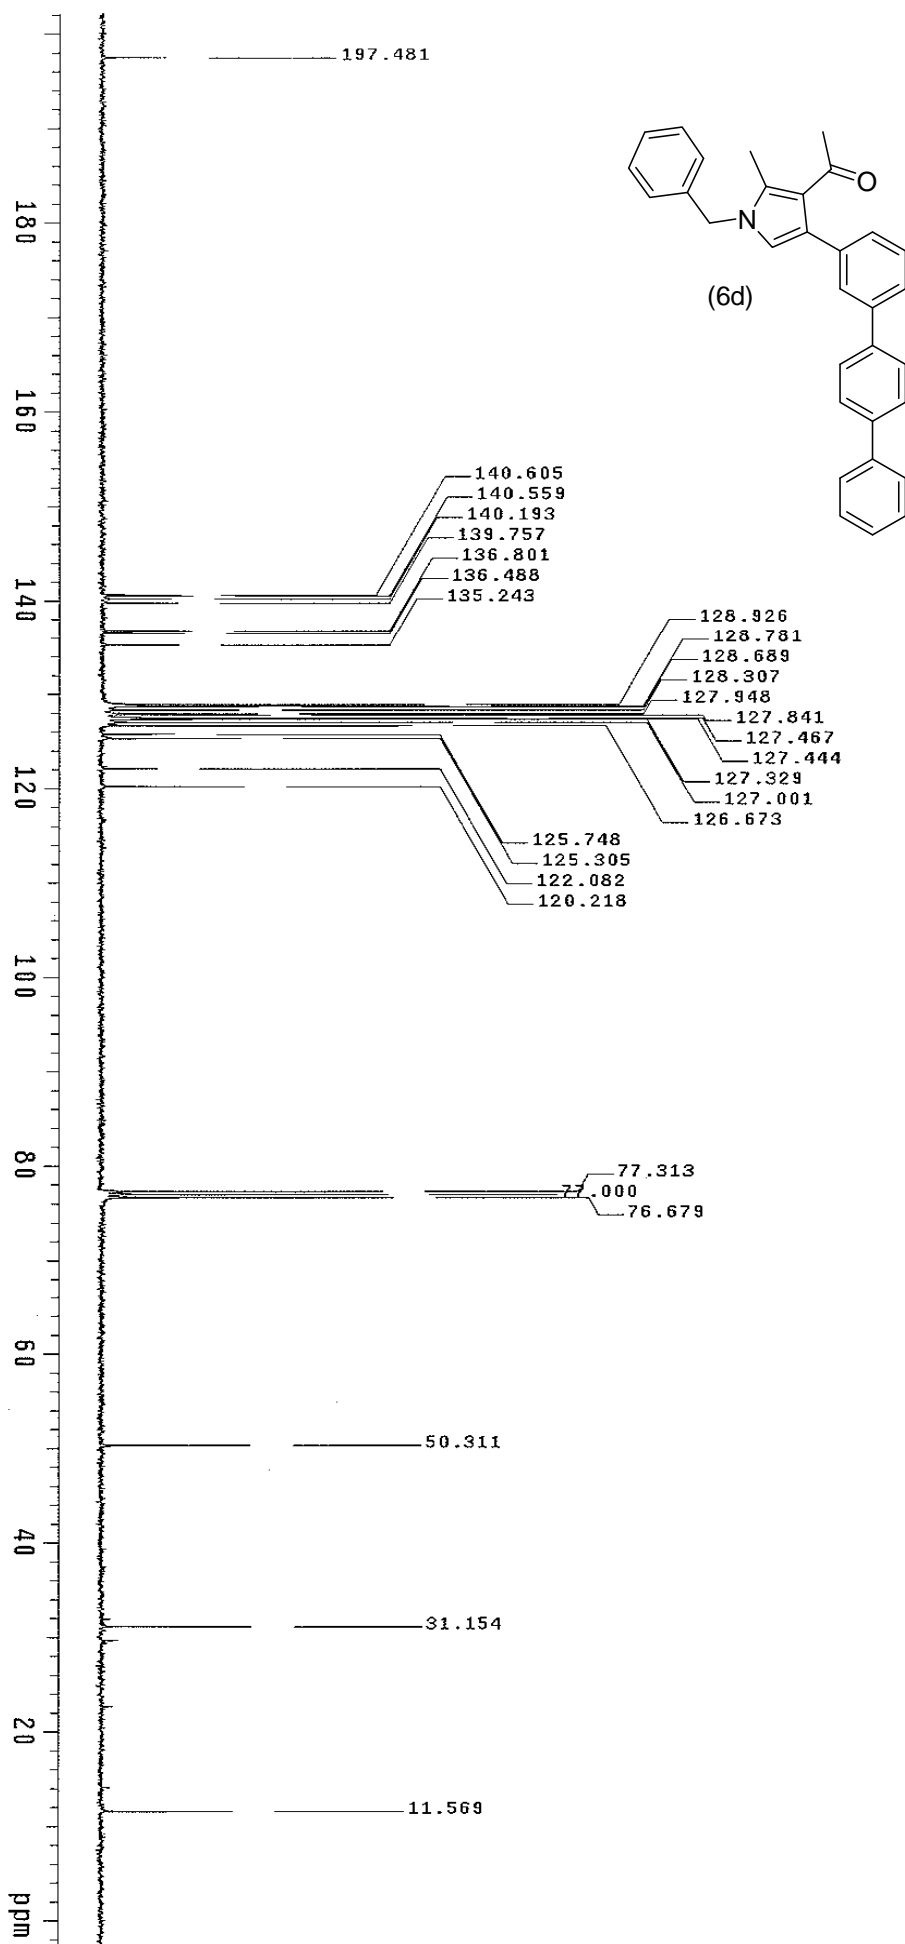

A009-CFCU-4-018 1n CDCl<sub>3</sub>  
NMR-400

A009/CFSU-3/018

UT0911\_10 4 (0.088) Cm (2:4-57:76x0.010)

442.2185

1: TOF MS ES+  
5.09e3

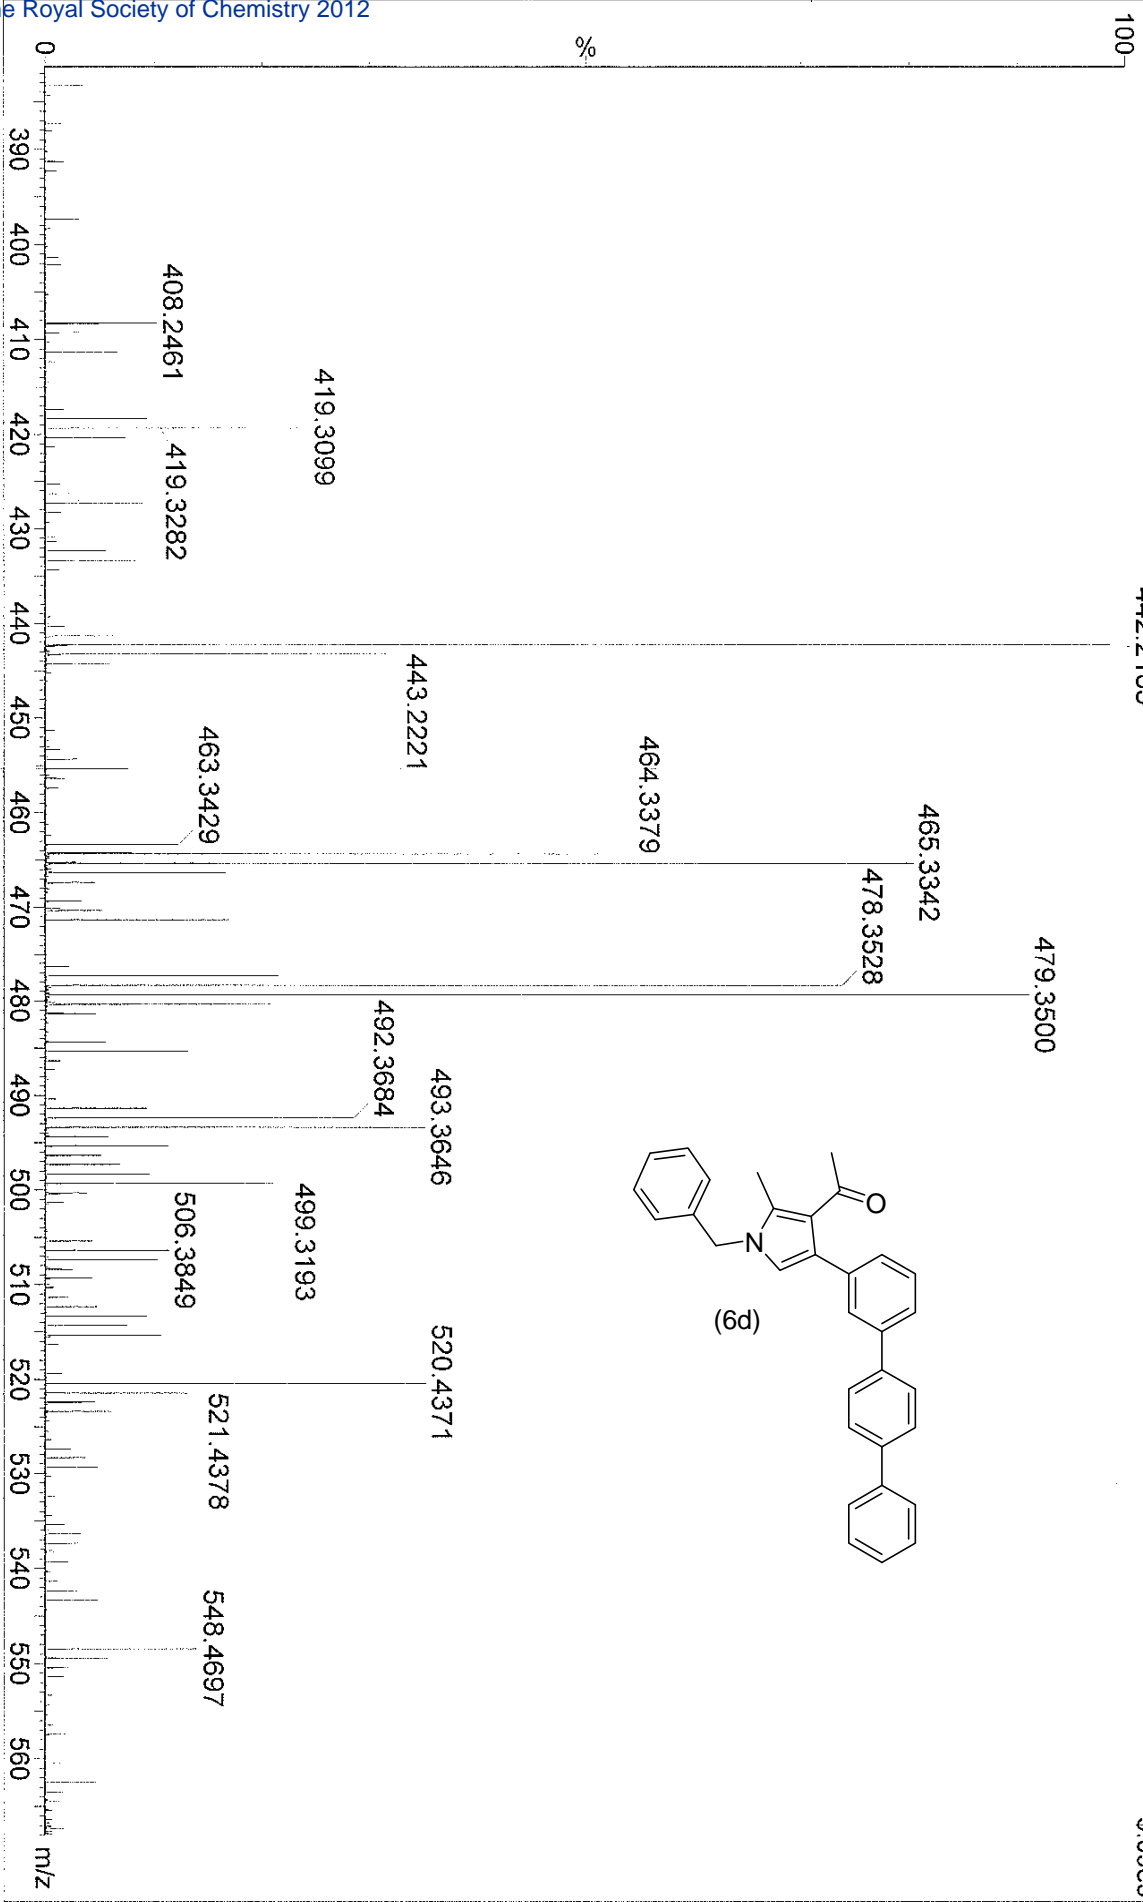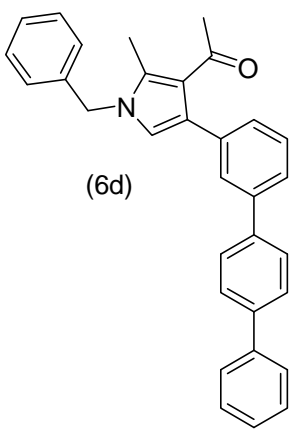



### Single Mass Analysis

Tolerance = 10.0 PPM / DBE: min = 0.0, max = 80.0  
Element prediction: Off  
Number of isotope peaks used for i-FIT = 4

Monoisotopic Mass, Even Electron Ions  
91 formula(e) evaluated with 1 results within limits (up to 4 best isotopic matches for each mass)

Elements Used:  
C: 0-35 H: 0-45 N: 0-3 O: 0-5  
A009/CFSU-3/018

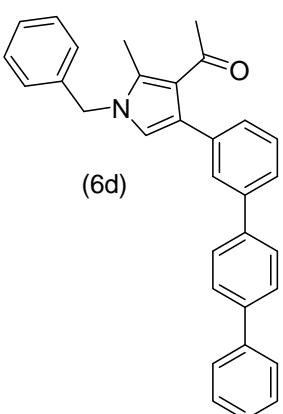

UT0911\_10 4 (0.088) Cm (2:4-57:76x0.010)

1: TOF MS ES+  
5.09e+003

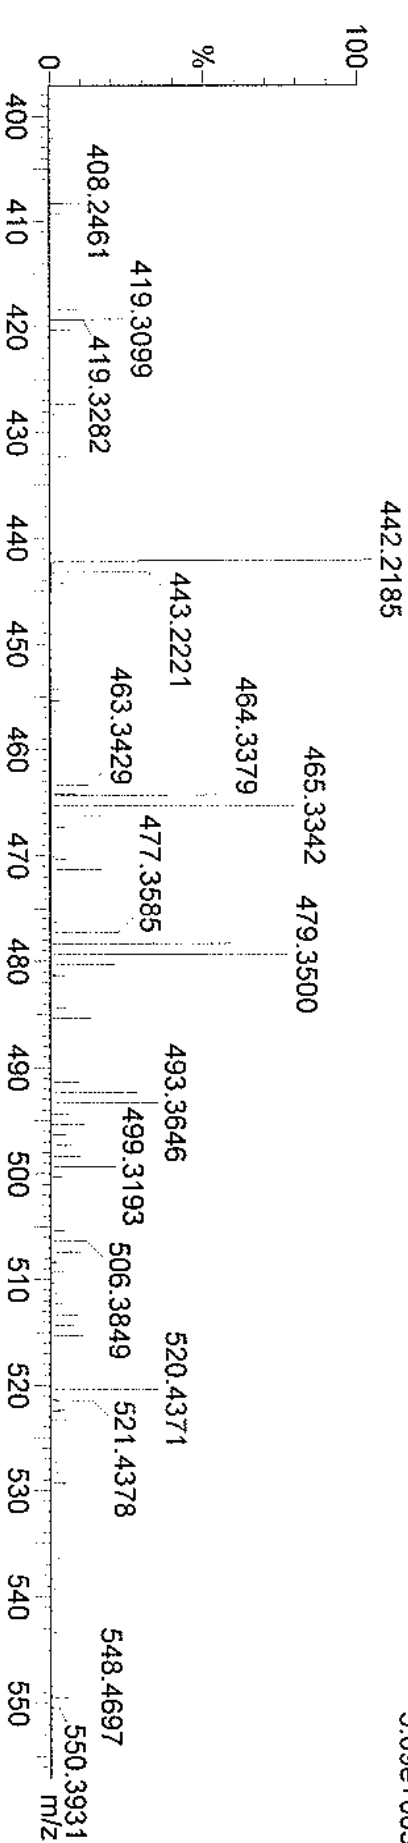

| Mass     | Calc. Mass | mDa | PPM | DBE  | i-FIT | Formula     |
|----------|------------|-----|-----|------|-------|-------------|
| 442.2185 | 442.2171   | 1.4 | 3.2 | 19.5 | 2.1   | C32 H28 N O |

Minimum: 0.0  
Maximum: 5.0

A009-CFSU-4-019 in CDCl<sub>3</sub>  
NMR-400

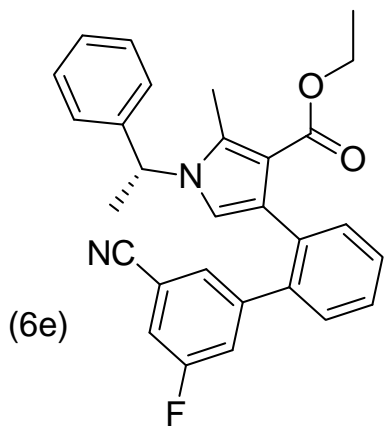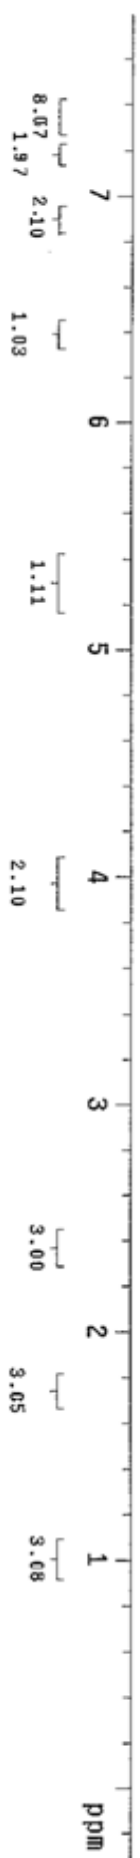

A009-CFGLJ-4-019 in CDCl<sub>3</sub>  
NMR-400

180  
160  
140  
120  
100  
80  
60  
40  
20  
ppm

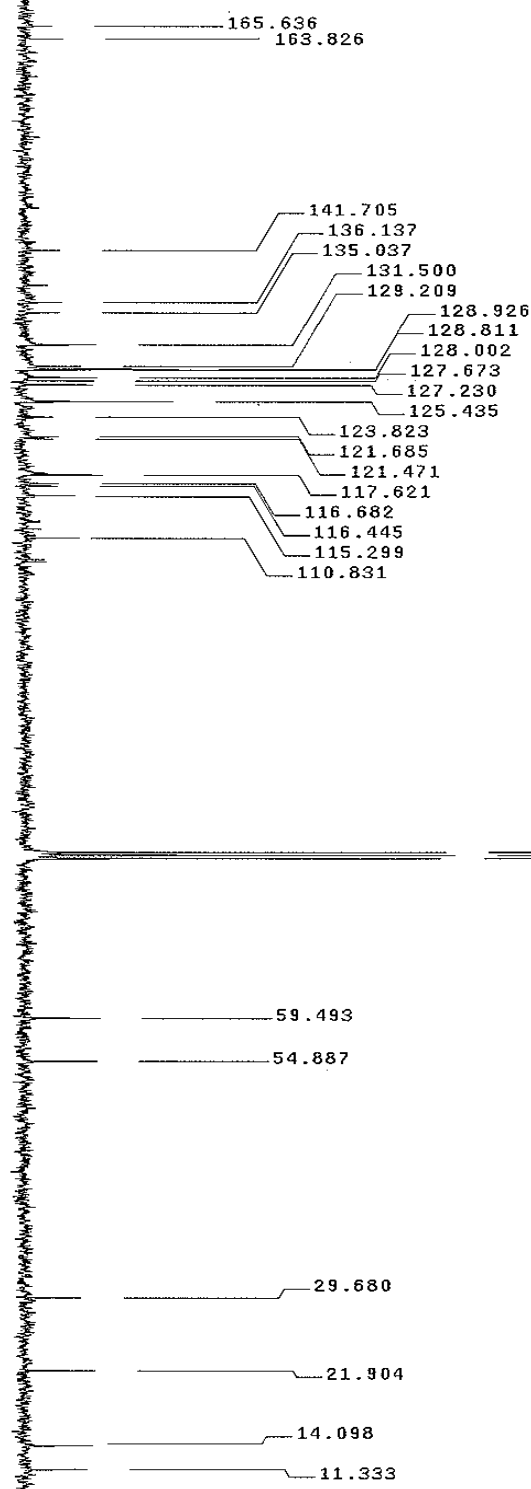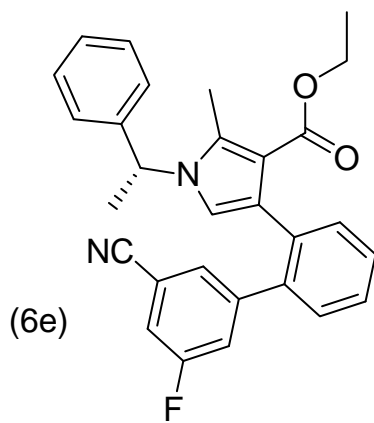

A009/CFSU-2/019

UT0911\_113.20 (0.534) Cm (20:21-47:55x0.010)

453.1981

1: TOF MS ES+  
4.44e3

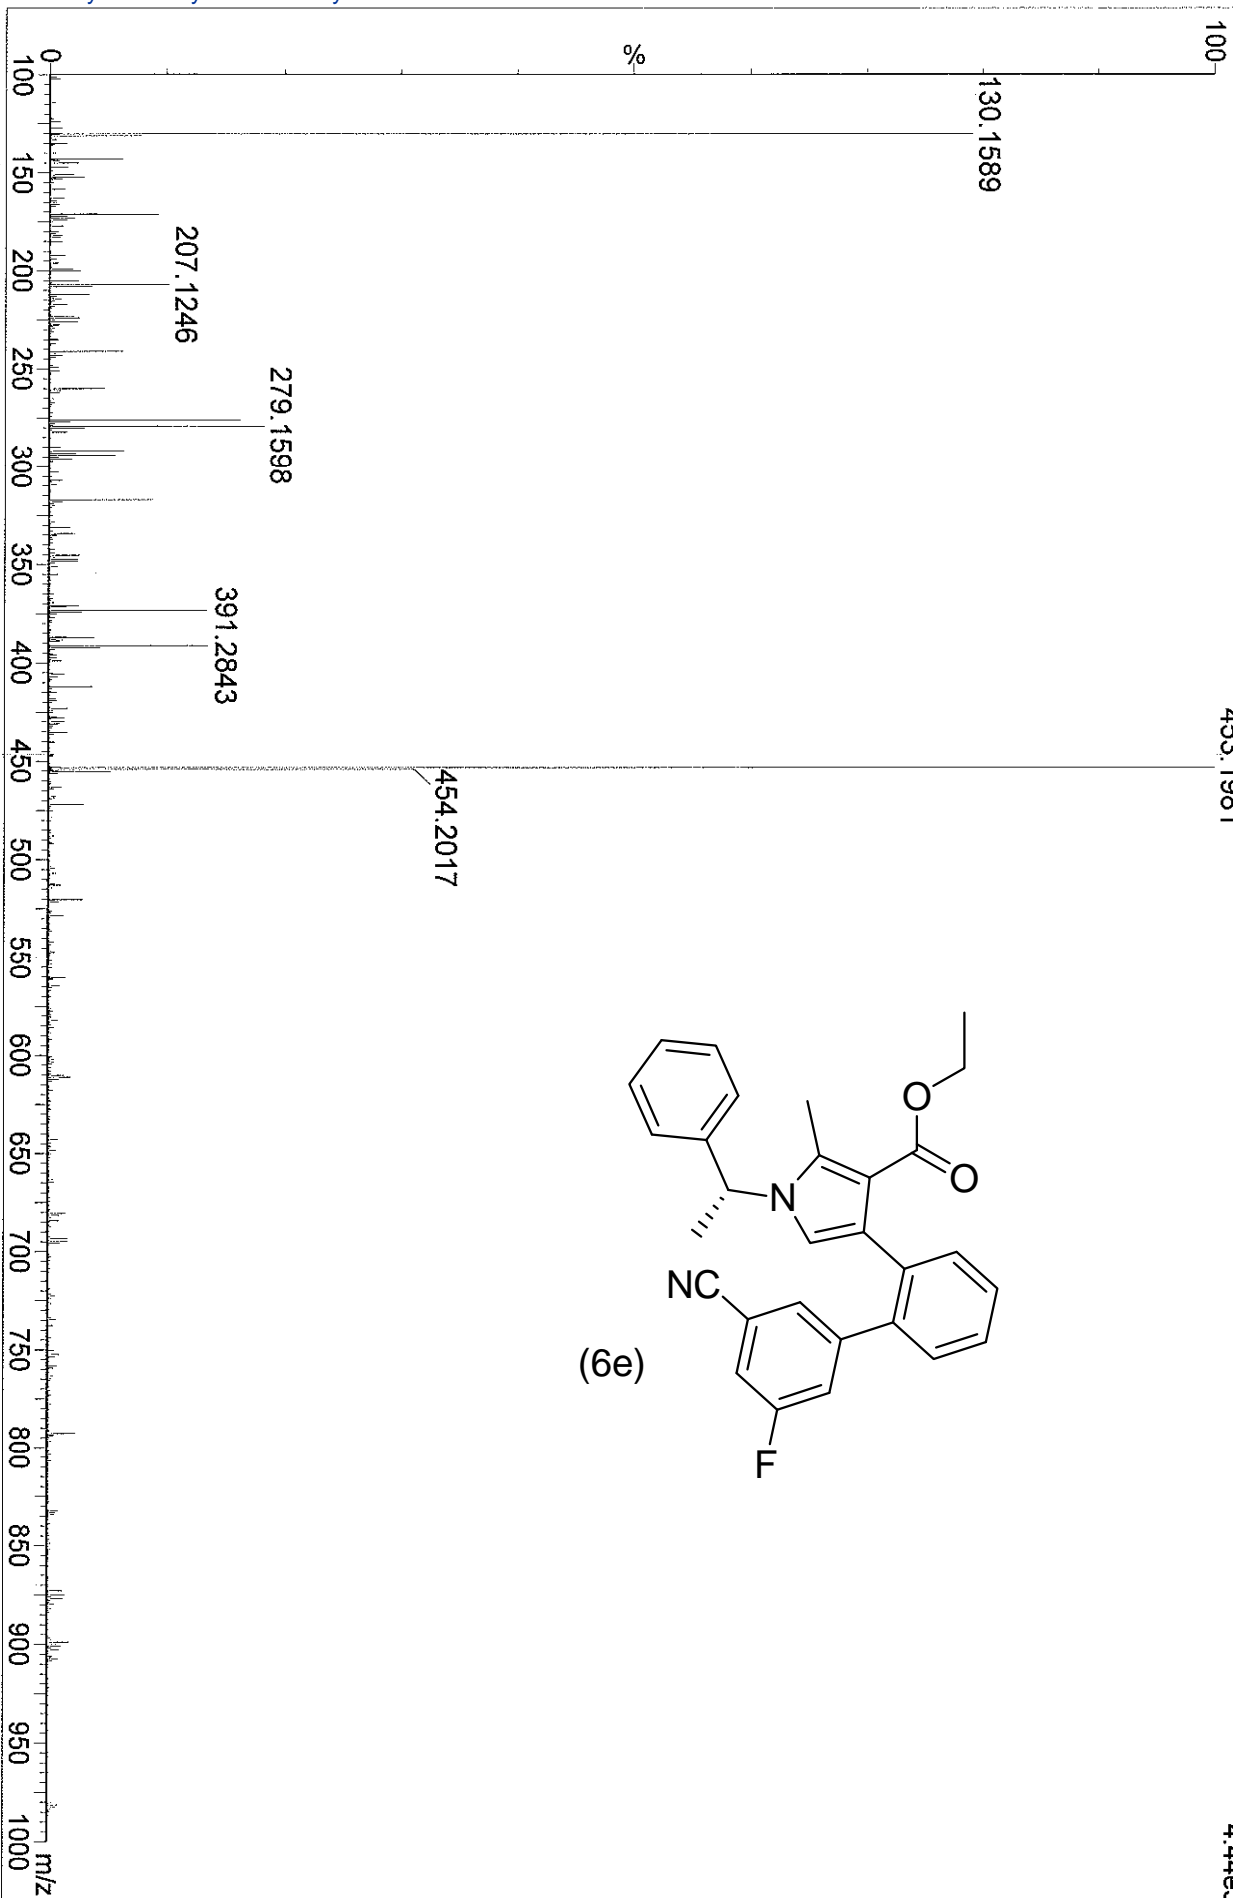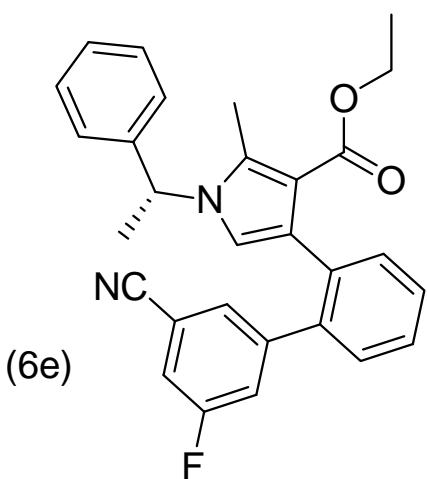

# Elemental Composition Report

## Single Mass Analysis

Tolerance = 5.0 PPM / DBE: min = 0.0, max = 80.0  
Element prediction: Off  
Number of isotope peaks used for i-FIT = 3

Monoisotopic Mass, Even Electron Ions

322 formula(e) evaluated with 2 results within limits (up to 4 best isotopic matches for each mass)

Elements Used:

C: 0-50 H: 0-65 N: 0-5 O: 0-4 F: 0-1

A009/CFSU-2/019

UT0911\_113 20 (0.534) Cm (20:21-47:55x0.010)

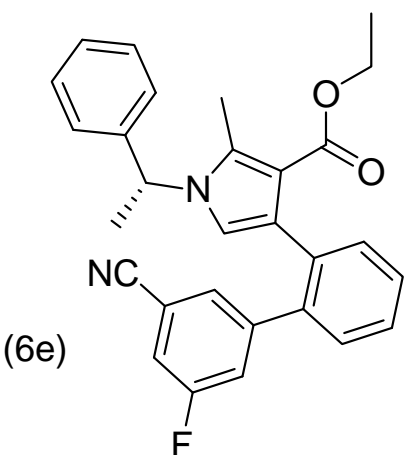

1: TOF MS ES+  
4.44e+003

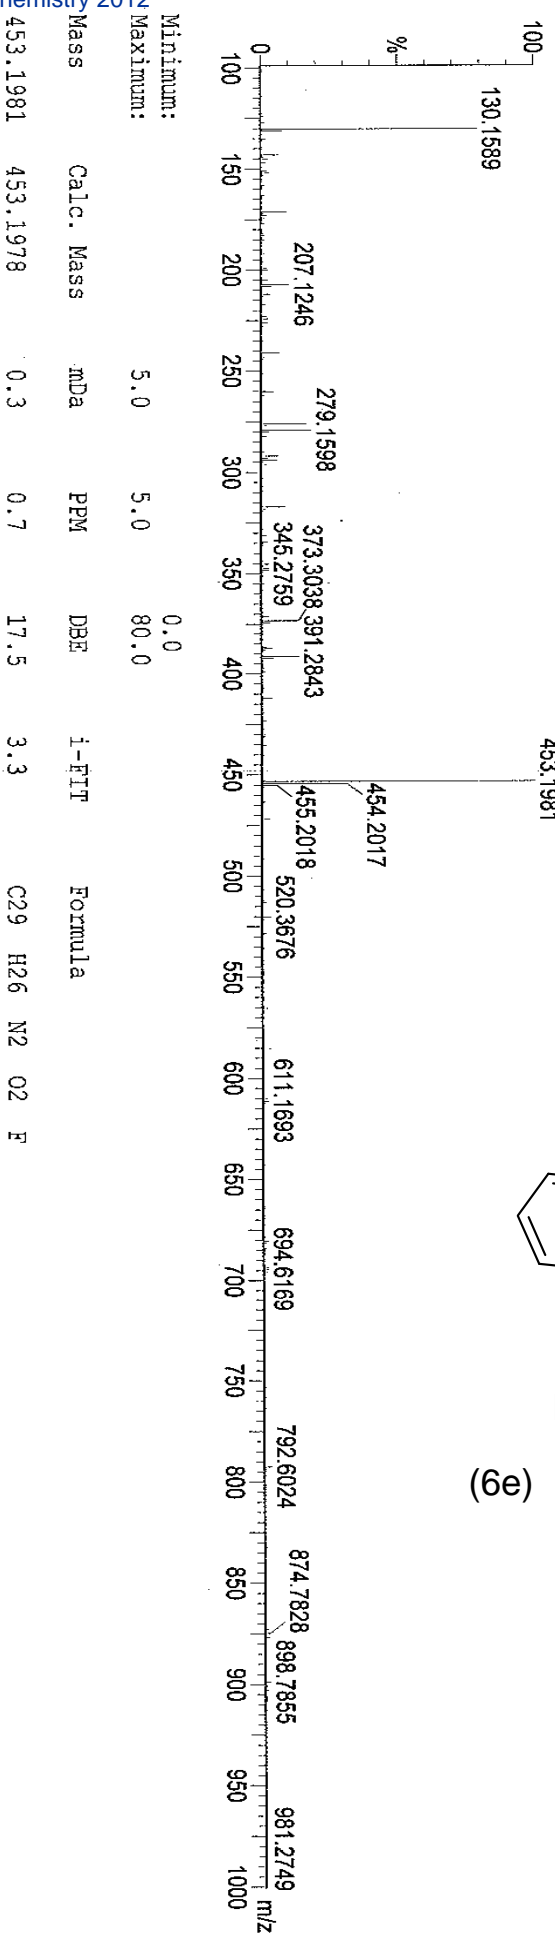

Minimum: 0.0  
Maximum: 5.0

| Mass     | Calc. Mass | mDa | PPM | DBE  | i-FIT | Formula         |
|----------|------------|-----|-----|------|-------|-----------------|
| 453.1981 | 453.1978   | 0.3 | 0.7 | 17.5 | 3.3   | C29 H26 N2 O2 F |

A004-CPSU-4-017 1n CDCl<sub>3</sub>  
NMR-400

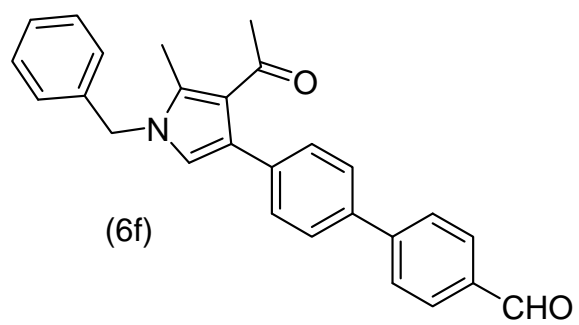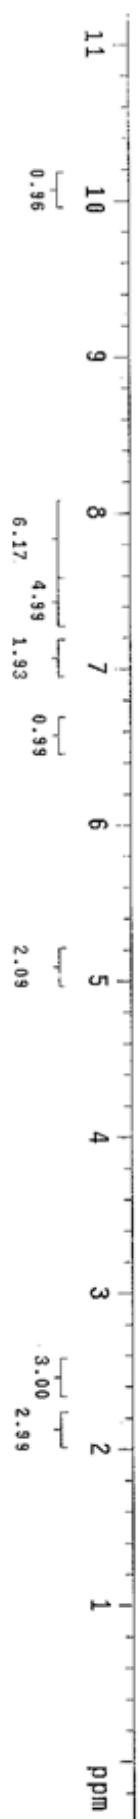

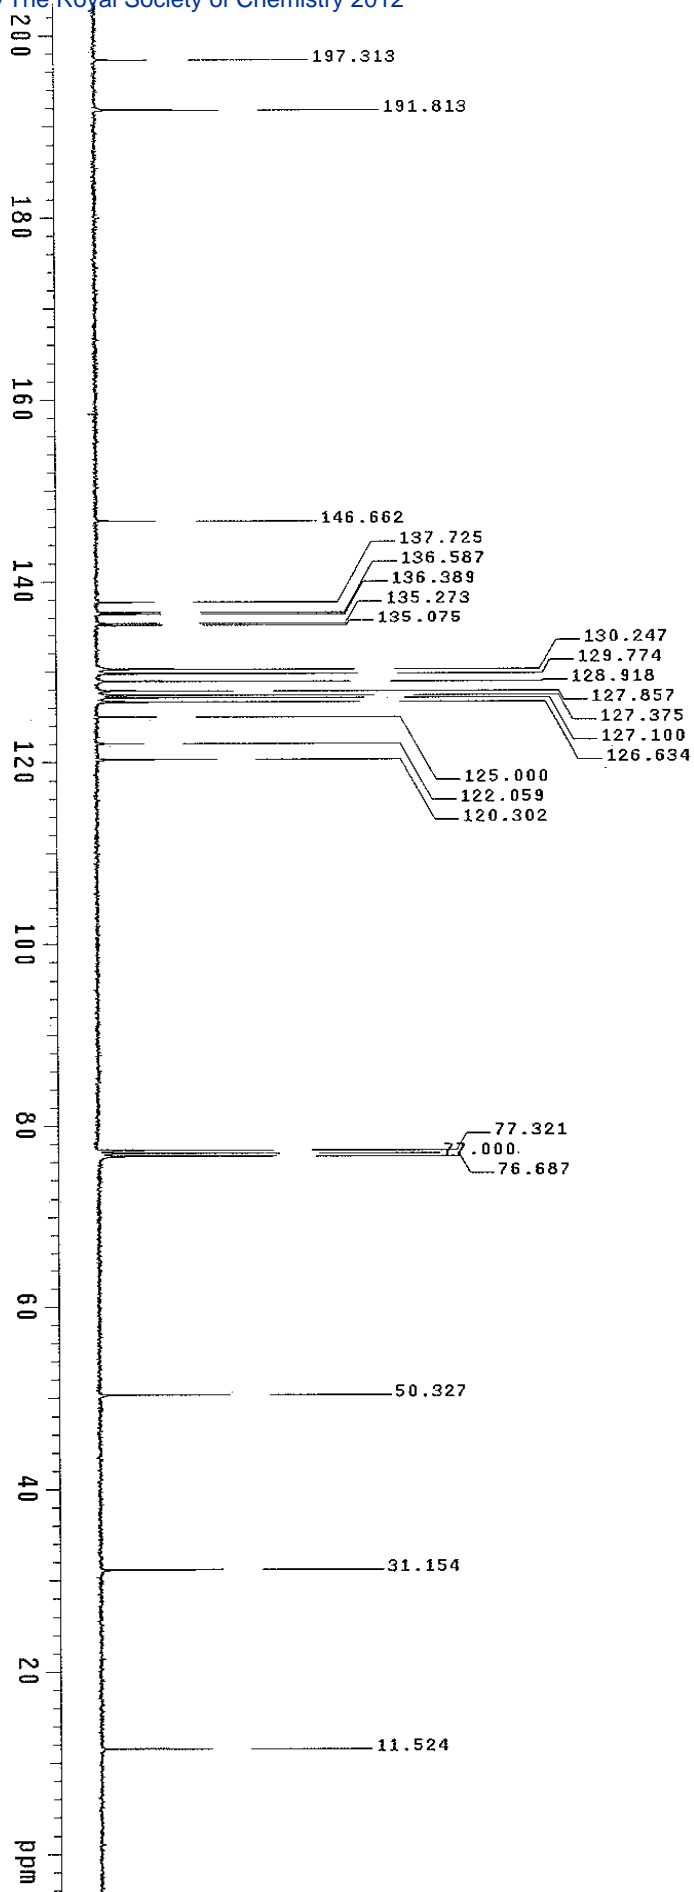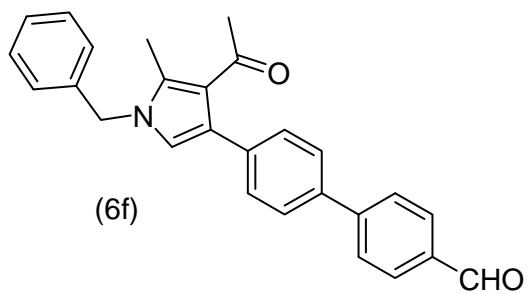

A004-SPSU-4-017 in CDCl<sub>3</sub>  
NMR-400

A004/CPSU-4/017

UT1210\_283\_17 (0.325) Cm (17:32-92:103)

1: TOF MS ES+  
6.75e3

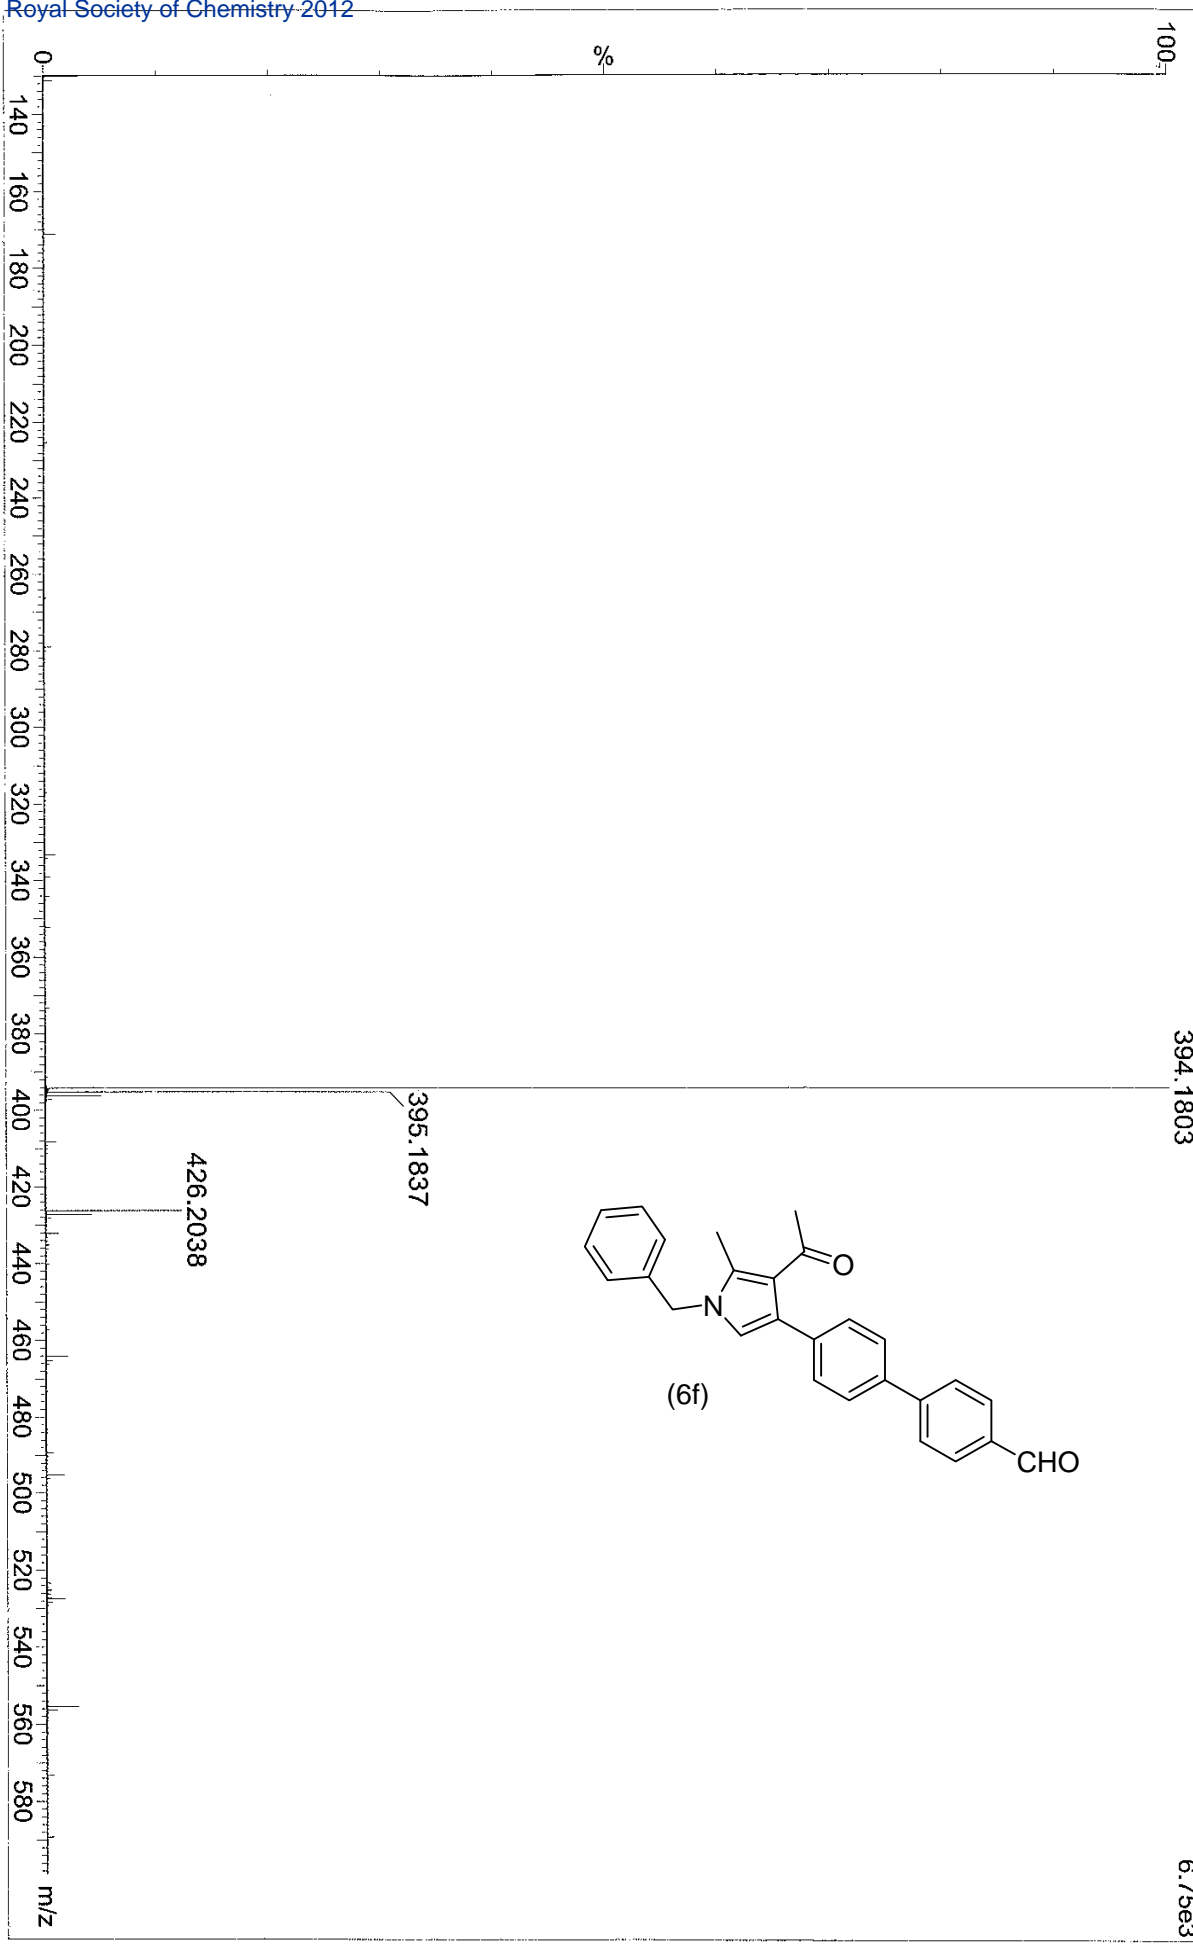



# Elemental Composition Report

## Single Mass Analysis

Tolerance = 5.0 PPM / DBE: min = -1.0, max = 80.0

Element prediction: Off

Number of isotope peaks used for I-FIT = 4

Monoisotopic Mass, Even Electron Ions

177 formula(e) evaluated with 1 results within limits (up to 5 closest results for each mass)

Elements Used:

C: 0-50 H: 0-75 N: 0-5 O: 0-5

A004/CPSU-4/017

UT1210\_283 17 (0.325) Cm (17:32:92:103)

1: TOF MS ES+  
6.75e+003

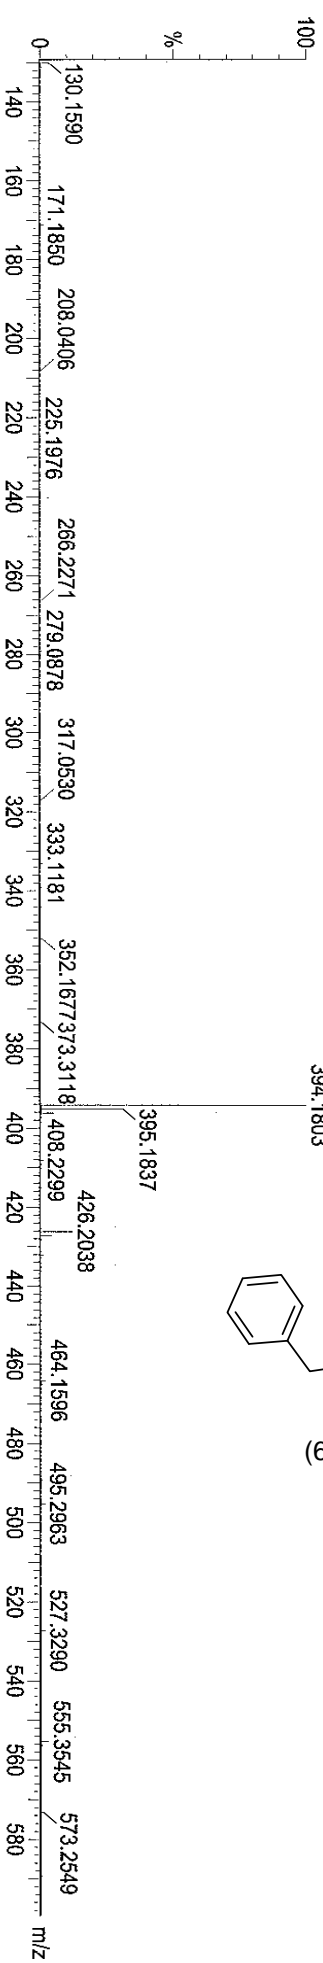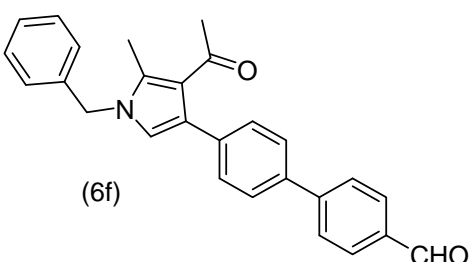

Minimum: -1.0  
Maximum: 80.0

| Mass     | Calc. Mass | mDa  | PPM  | DBE  | I-FIT | Formula      |
|----------|------------|------|------|------|-------|--------------|
| 394.1803 | 394.1807   | -0.4 | -1.0 | 16.5 | 0.1   | C27 H24 N O2 |

A005/CPSG-4/013 in CDCl<sub>3</sub>  
NMR: 500MHz

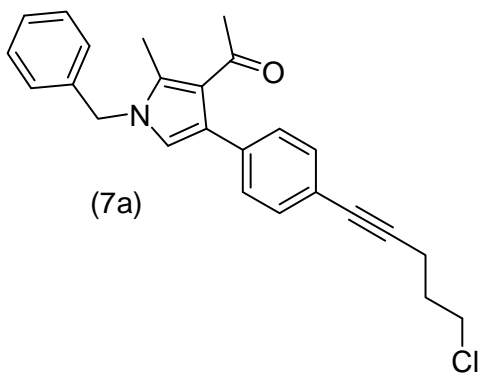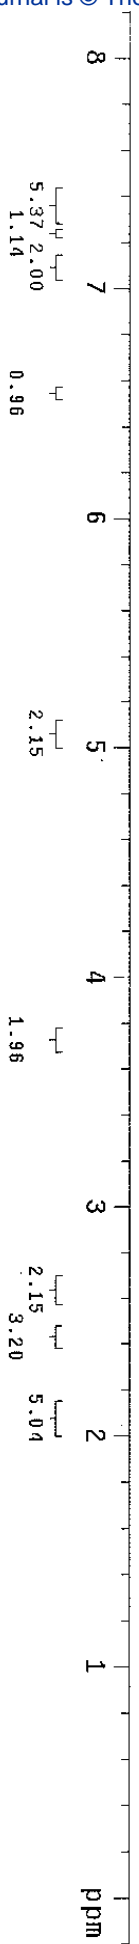

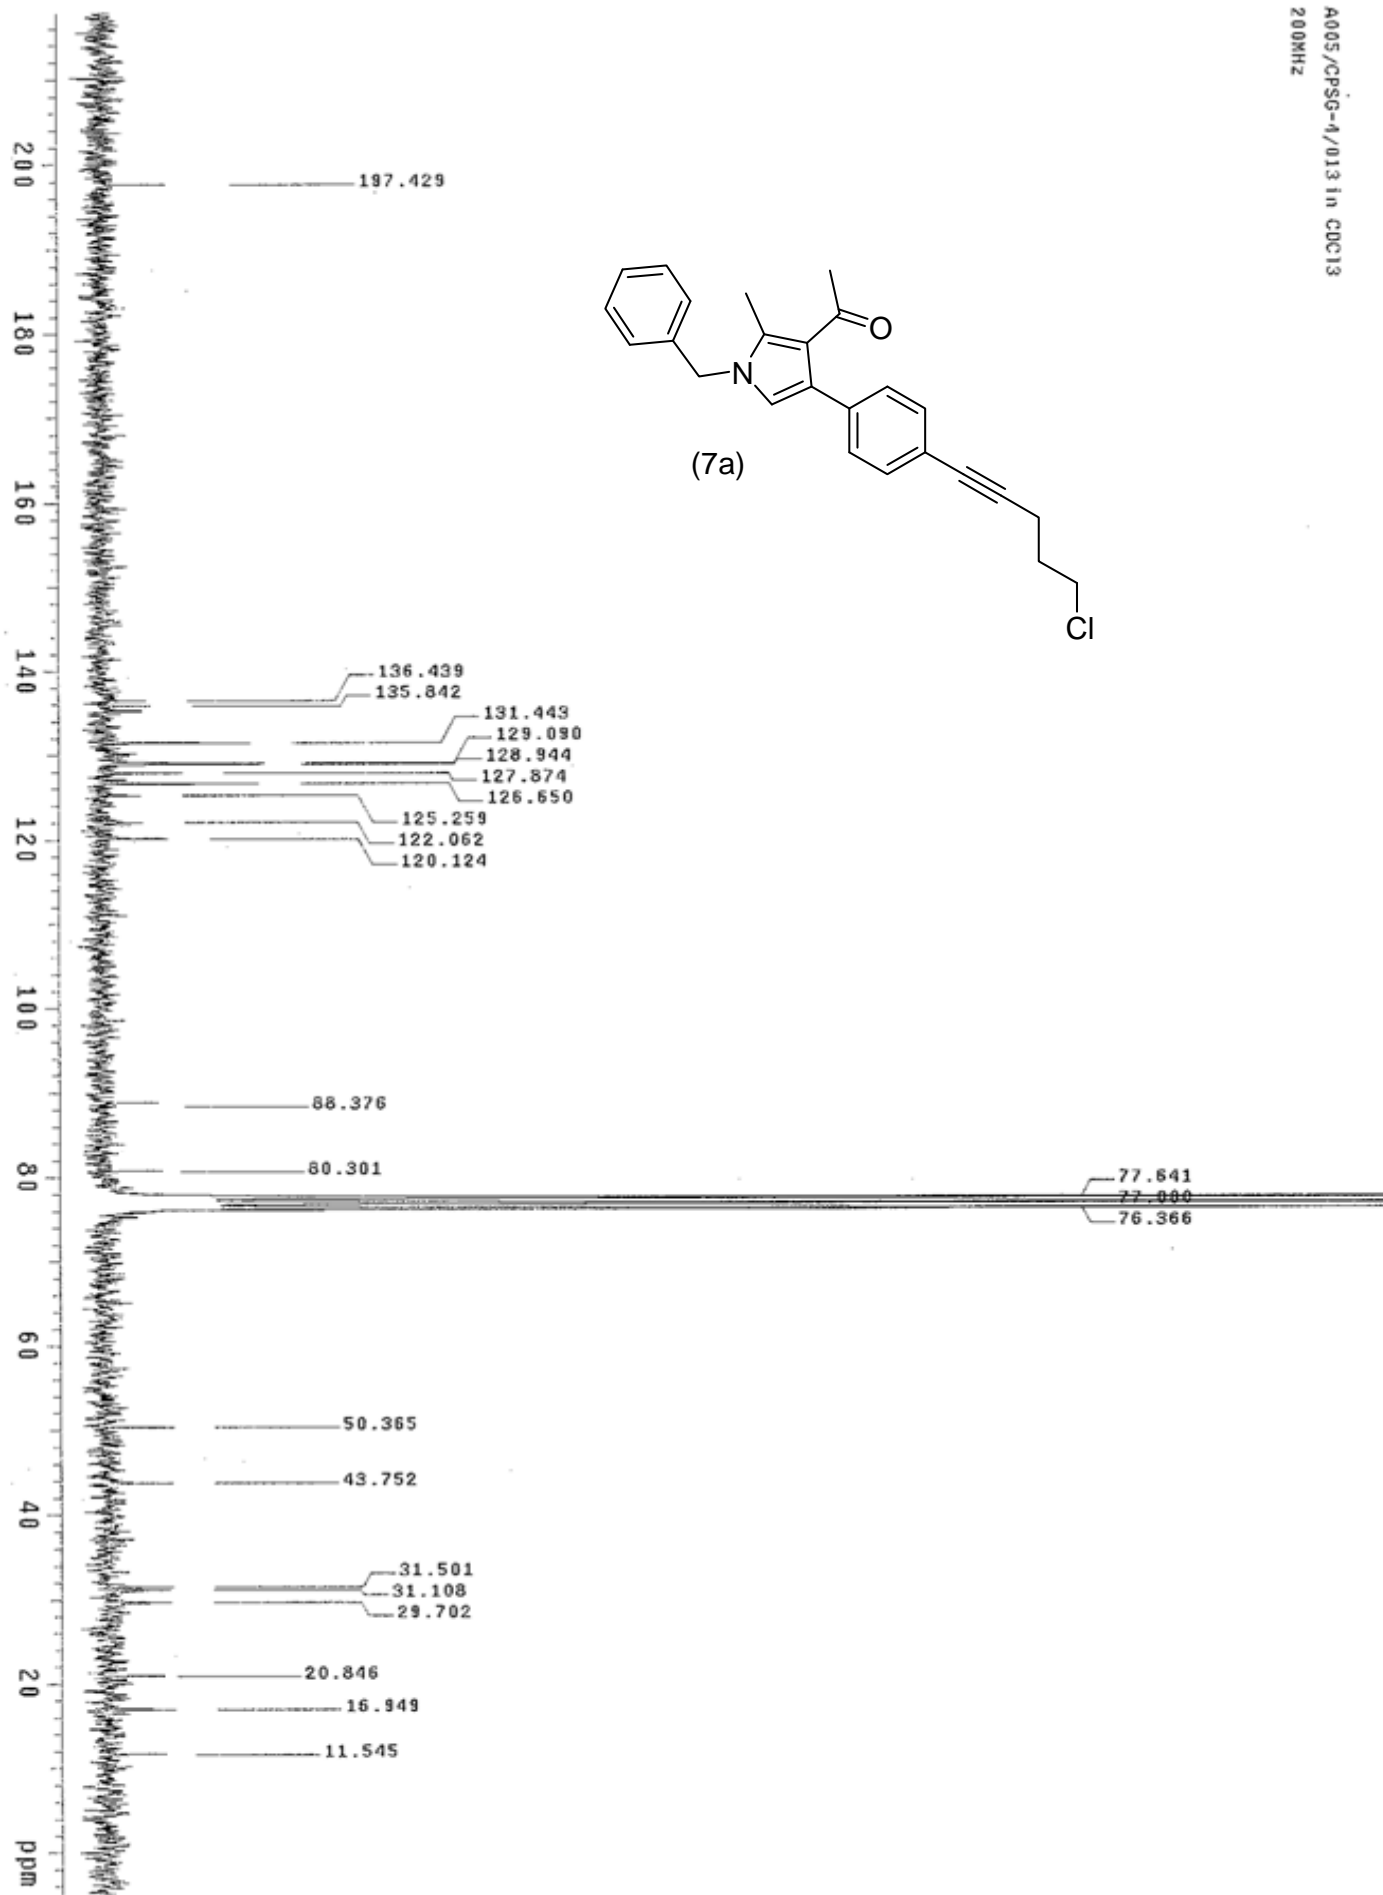

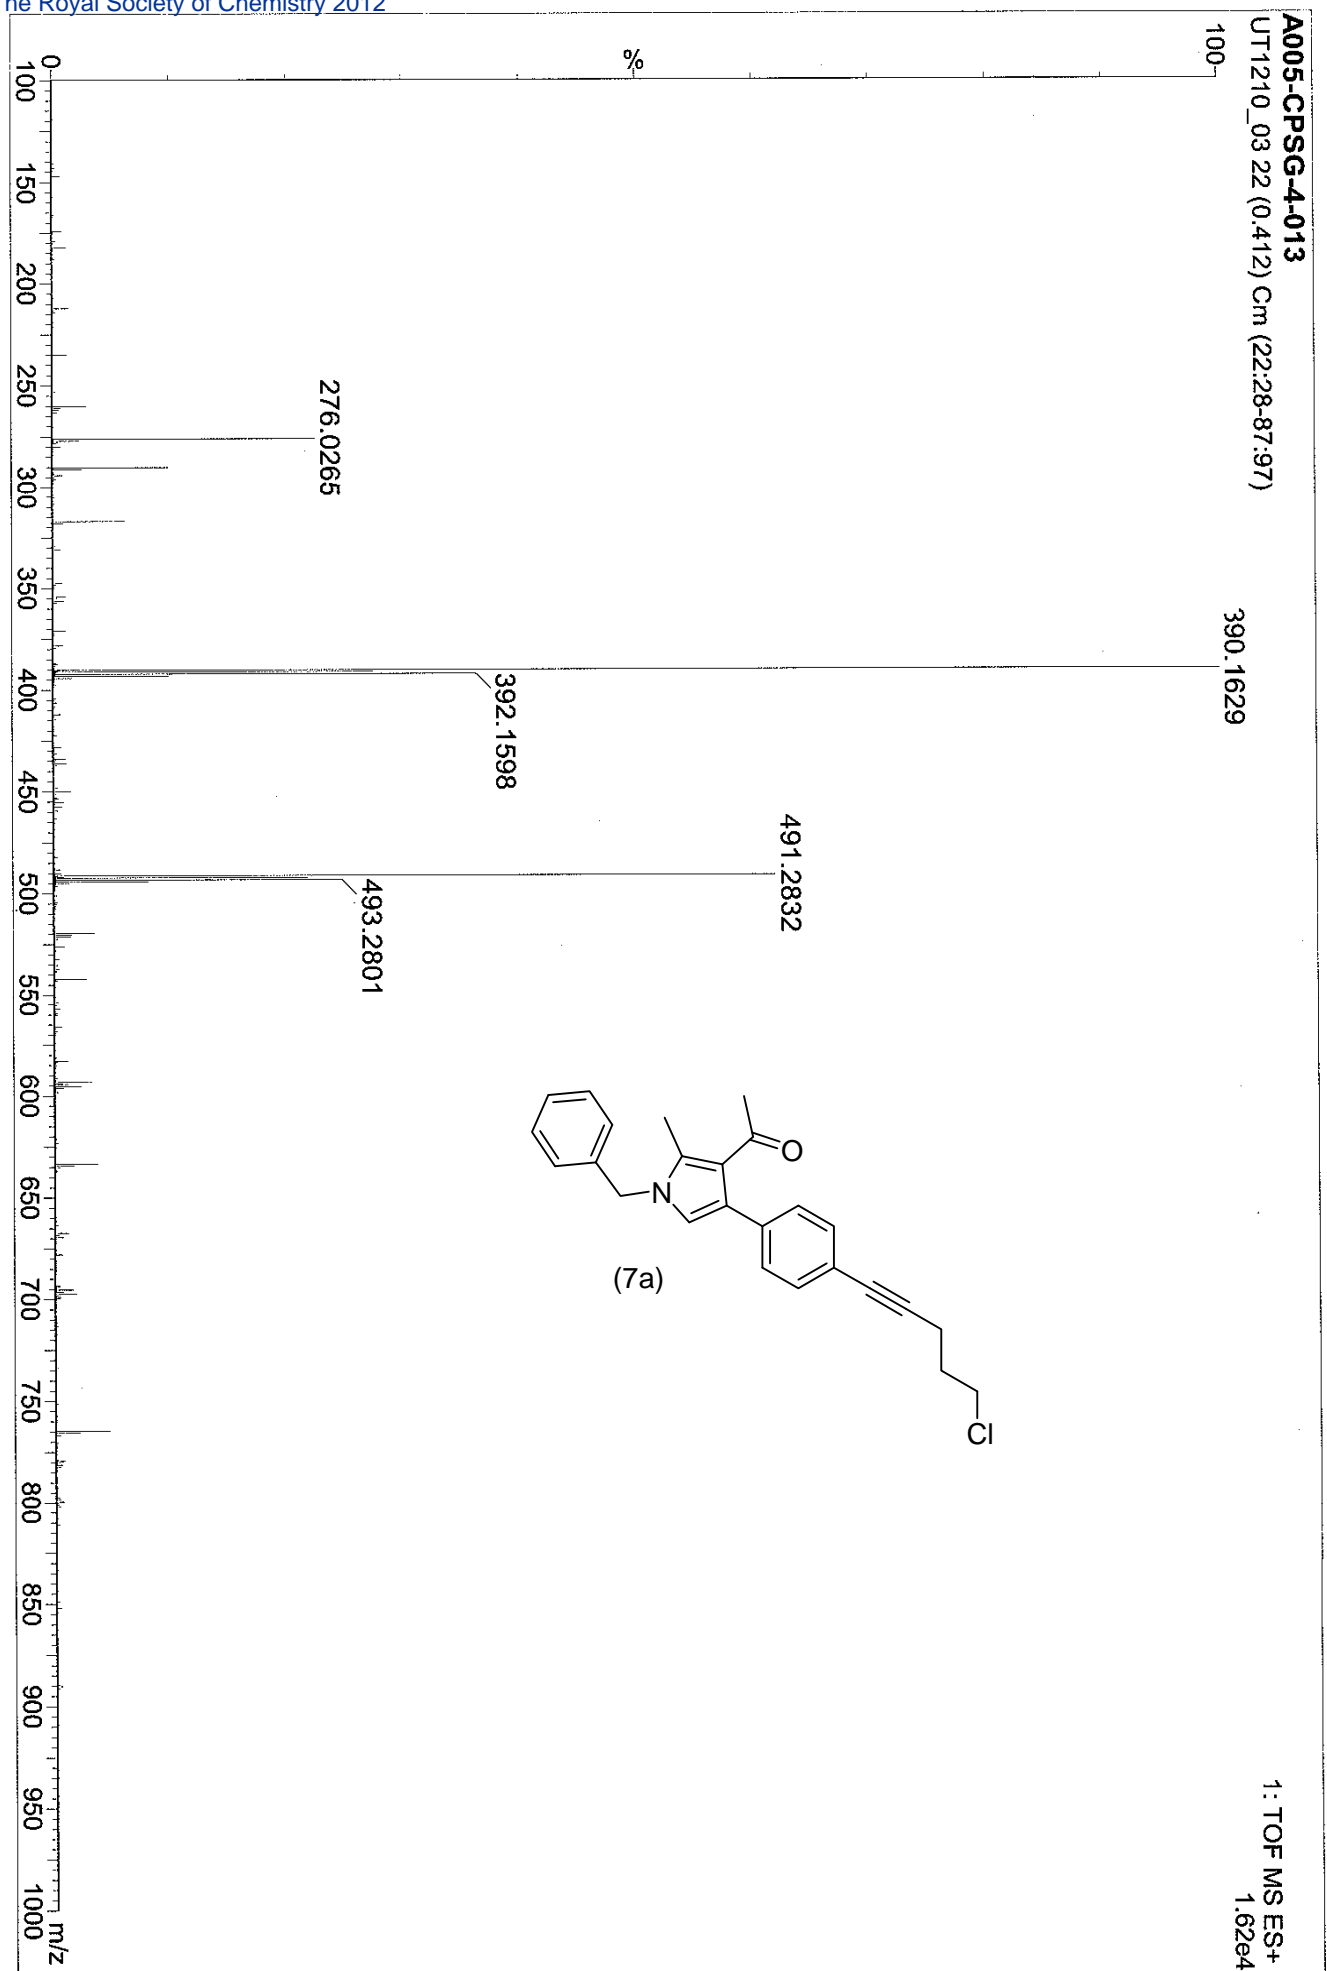

## Elemental Composition Report

### Single Mass Analysis

Tolerance = 5.0 PPM / DBE: min = -1.0, max = 80.0

Element prediction: Off

Number of isotope peaks used for i-FIT = 3

Monoisotopic Mass, Even Electron Ions

185 formula(e) evaluated with 1 results within limits (up to 4 best isotopic matches for each mass)

Elements Used:

C: 0-40 H: 0-55 N: 0-3 O: 0-4 Cl: 0-1

A005-QPSG-4-013

UT1210\_03 22 (0.412) Cm (22:28-87:97)

1: TOF MS E1  
1.62e+6

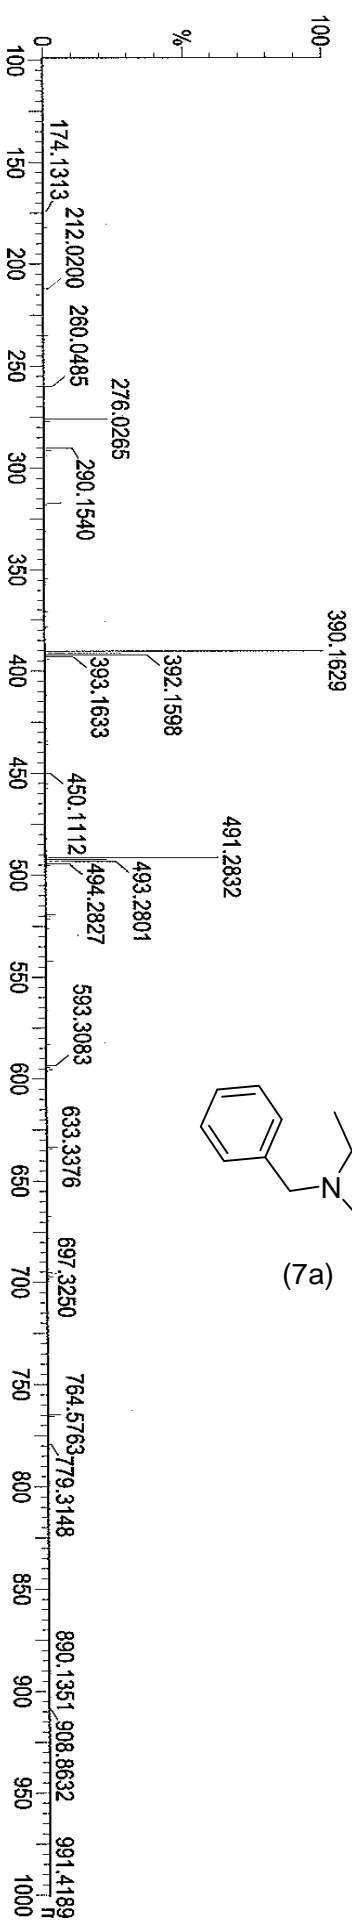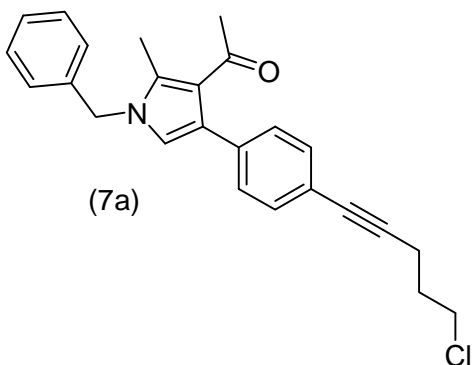

Minimum: -1.0  
Maximum: 80.0

| Mass     | Calc. Mass | mDa | PPM | DBE  | i-FIT | Formula        |
|----------|------------|-----|-----|------|-------|----------------|
| 390.1629 | 390.1625   | 0.4 | 1.0 | 13.5 | 3.4   | C25 H25 N O Cl |

A005/CPSSG-4/014 in CDCl<sub>3</sub>  
NMR-400

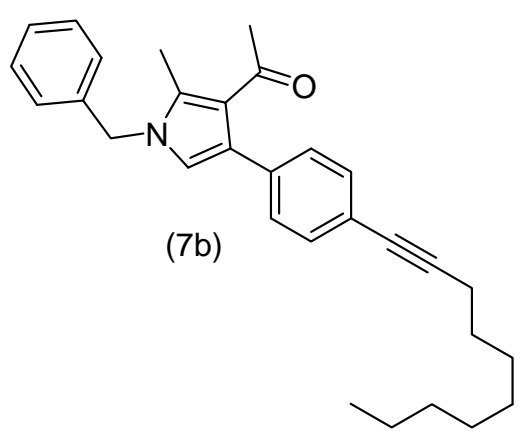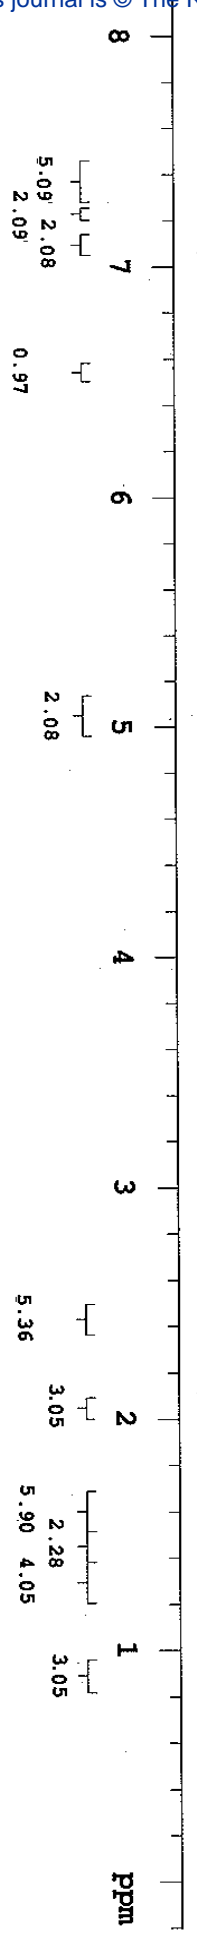

TDC-110 A005-CPSG-3-014 in CDCl<sub>3</sub>  
NMR-400

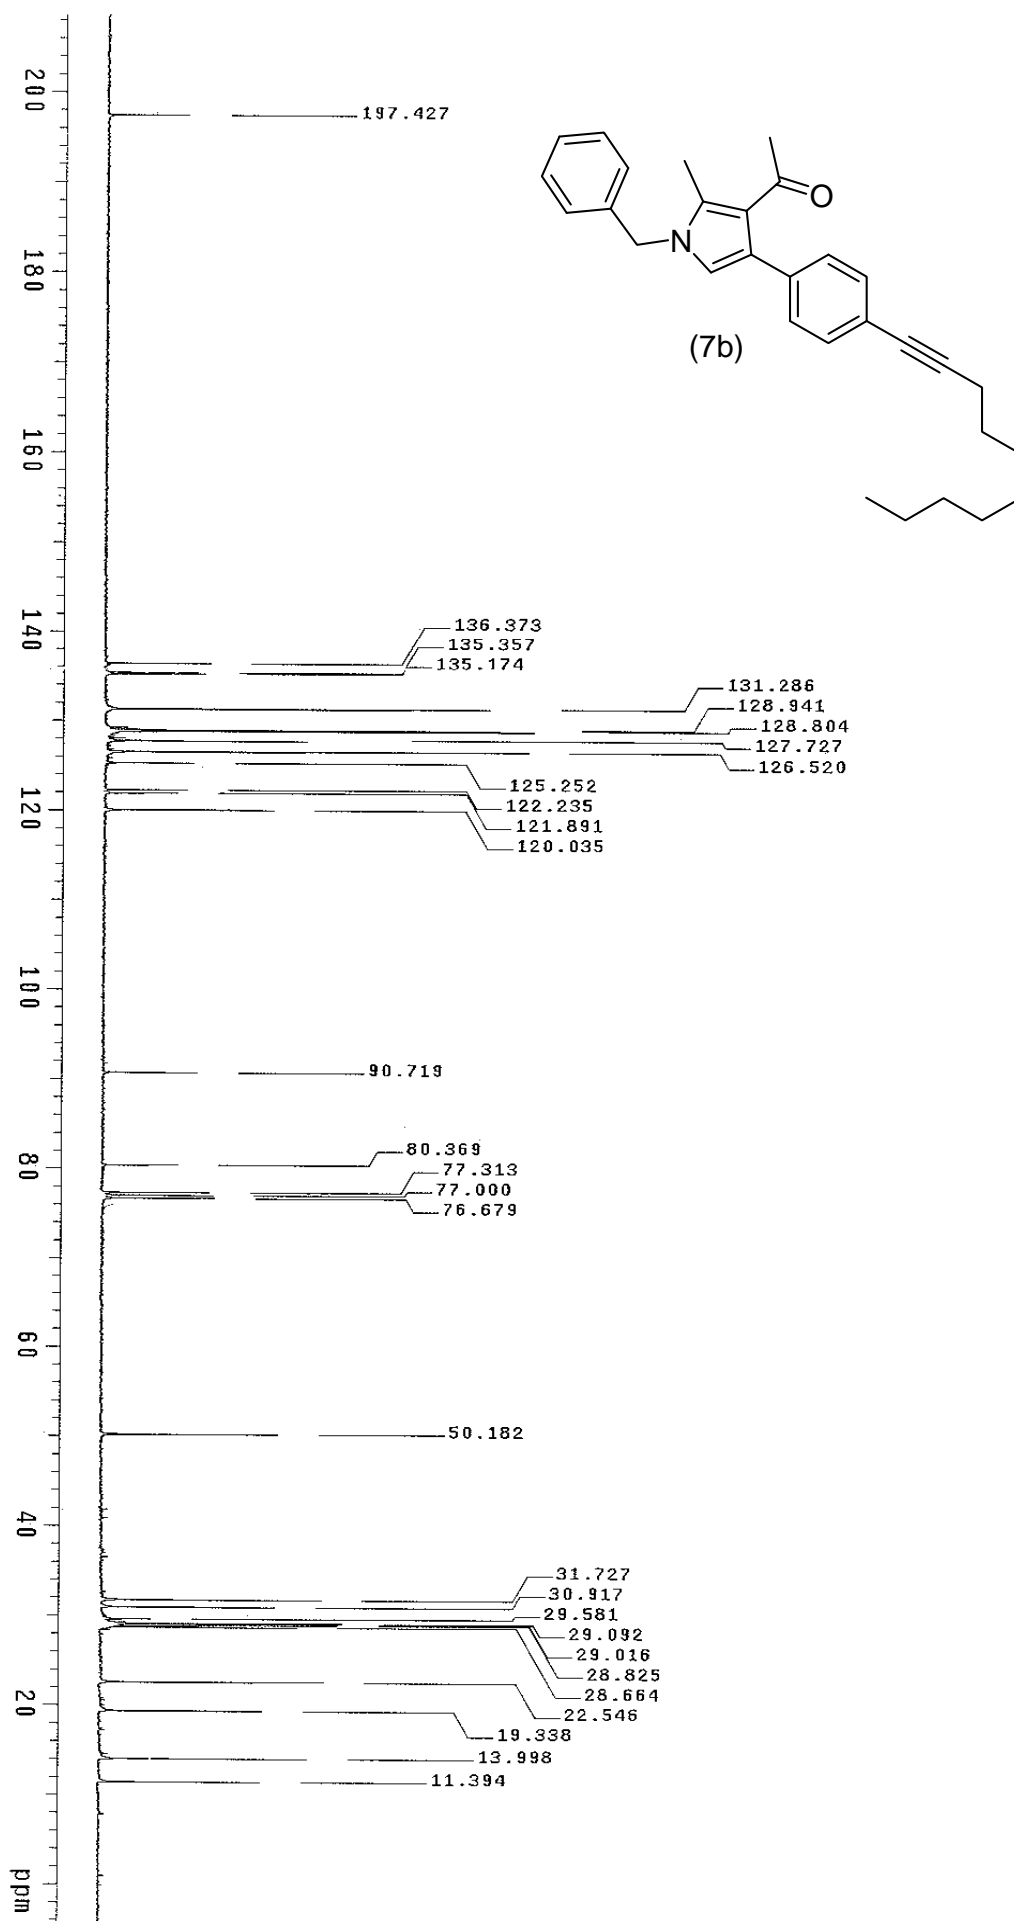

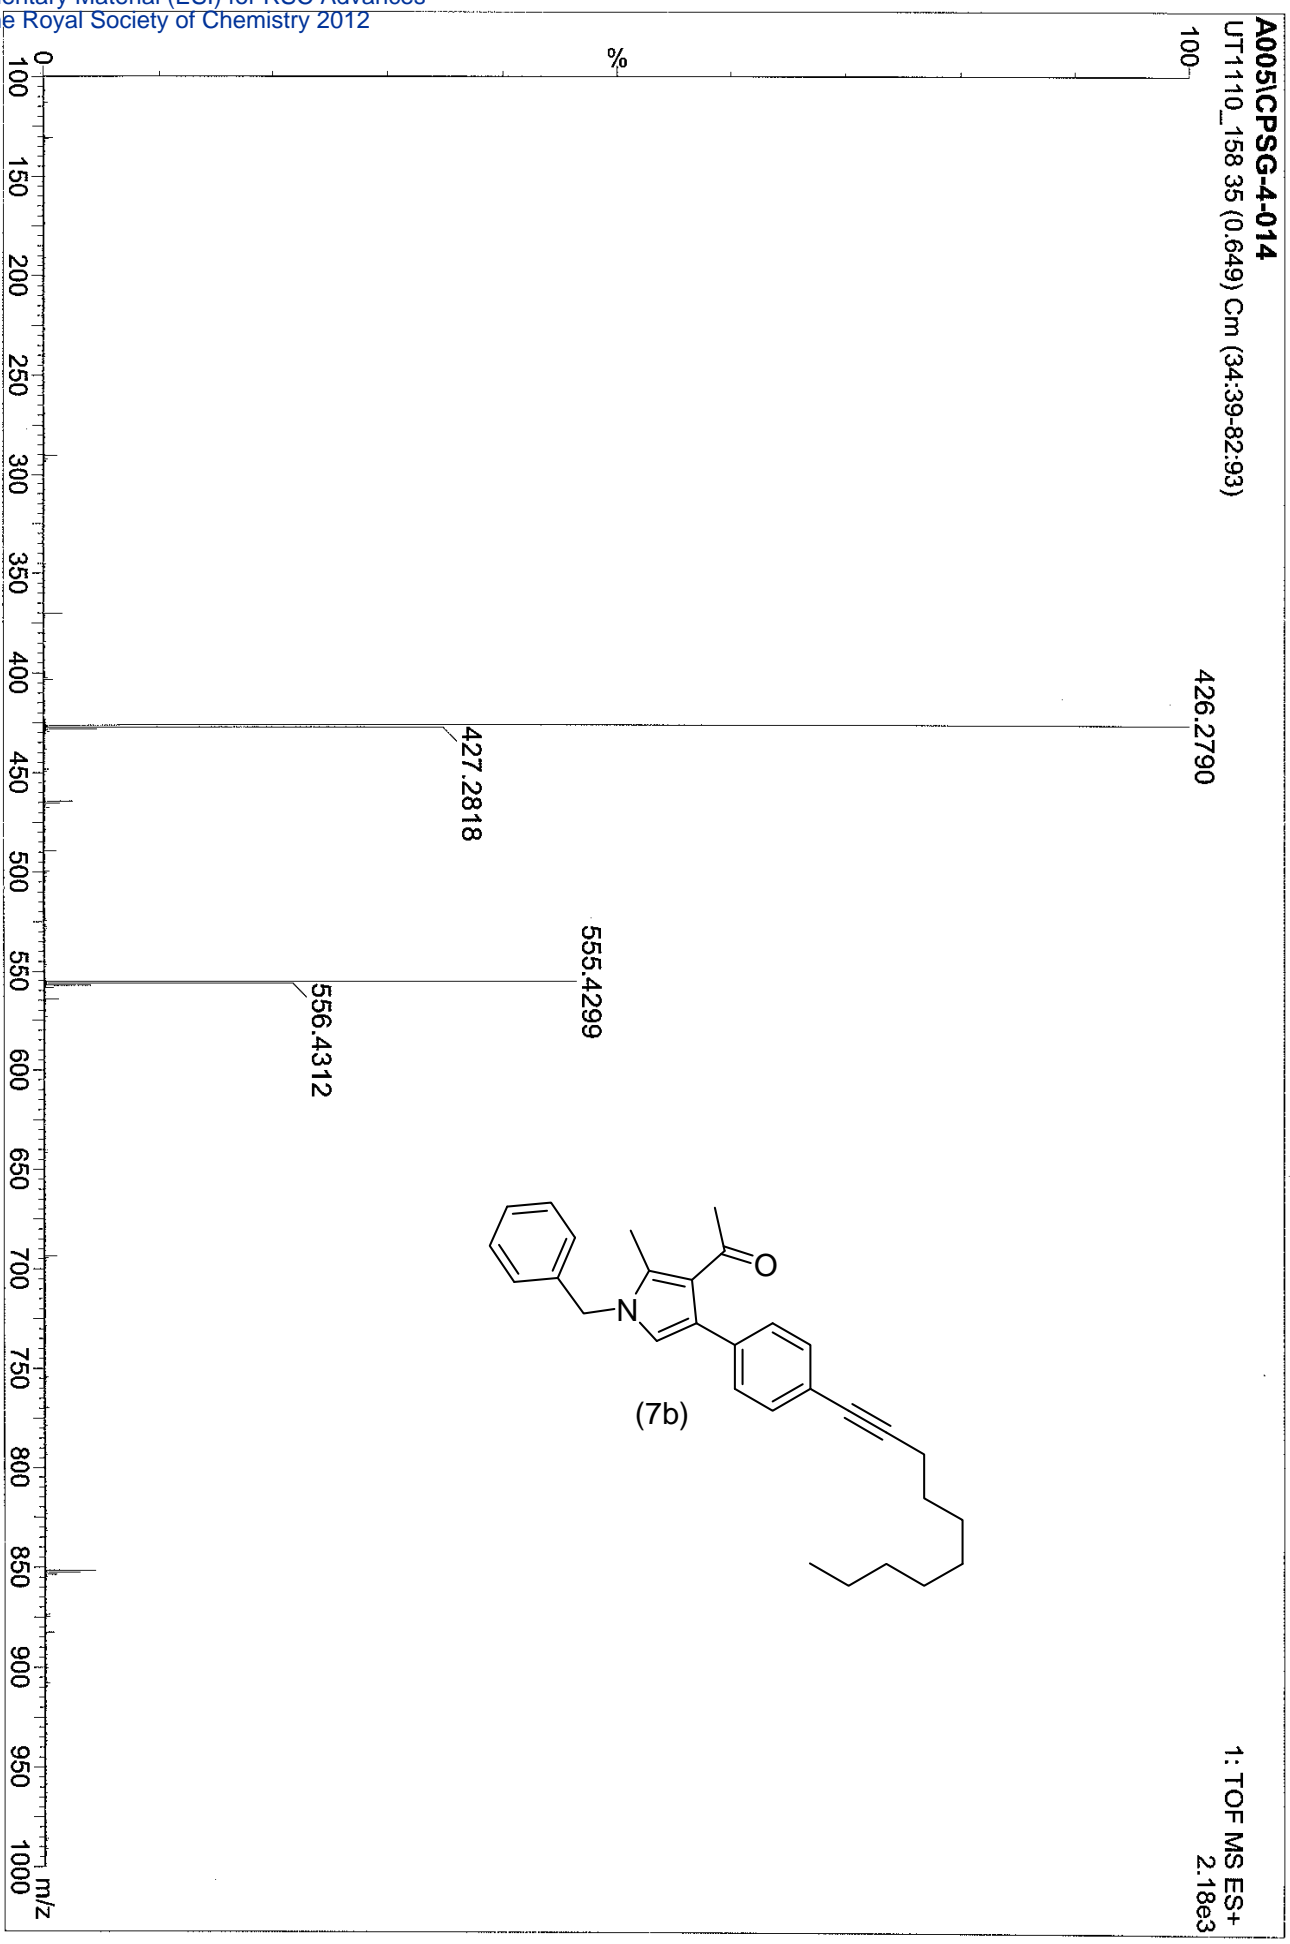



# Elemental Composition Report

## Single Mass Analysis

Tolerance = 5.0 PPM / DBE: min = -1.0, max = 80.0

Element prediction: Off

Number of isotope peaks used for i-FIT = 2

Monoisotopic Mass, Even Electron Ions

188 formula(e) evaluated with 1 results within limits (up to 4 best isotopic matches for each mass)

Elements Used:

C: 0-45 H: 0-65 N: 0-5 O: 0-5

A005(CPSG-4-014

UT1110\_158 35 (0.649) Cm (34:39-82:93)

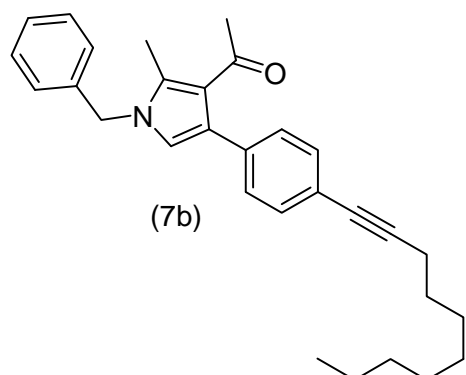

1: TOF MS ES+  
2.18e+003

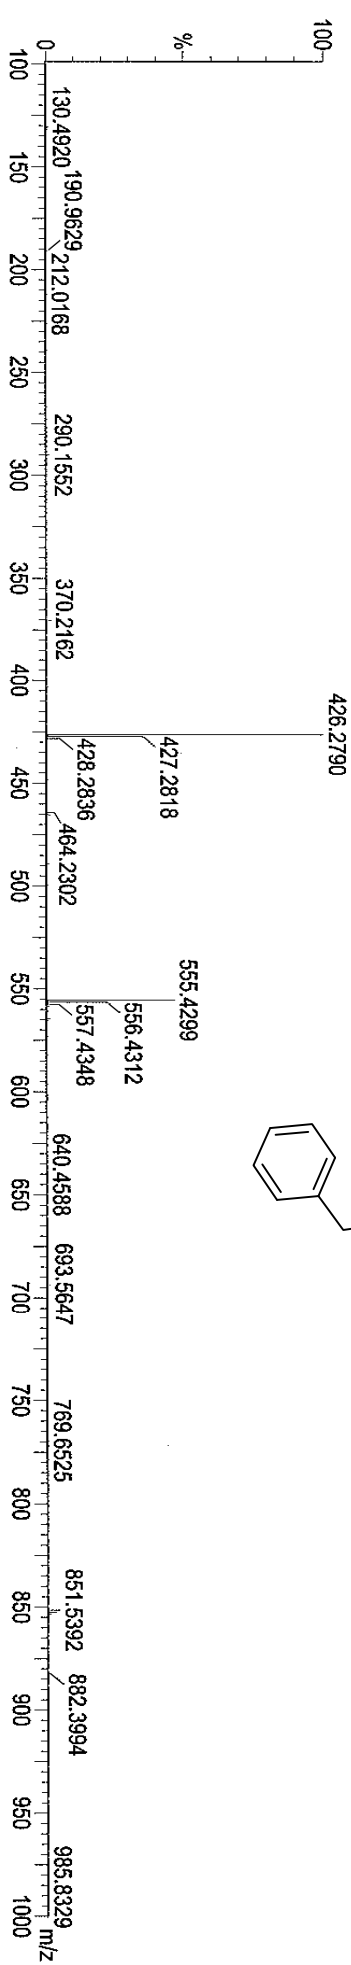

Minimum: -1.0

Maximum: 80.0

| Mass     | Calc. Mass | MDa  | PPM  | DBE  | i-FIT | Formula     |
|----------|------------|------|------|------|-------|-------------|
| 426.2790 | 426.2797   | -0.7 | -1.6 | 13.5 | 0.1   | C30 H36 N O |

A005-CPSG-4-015 in CDCl<sub>3</sub>  
NMR-400

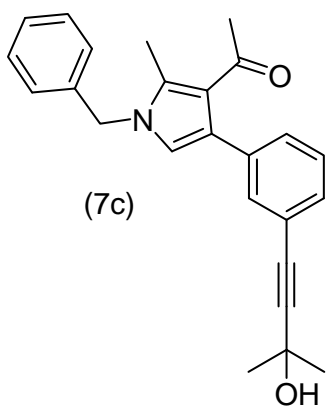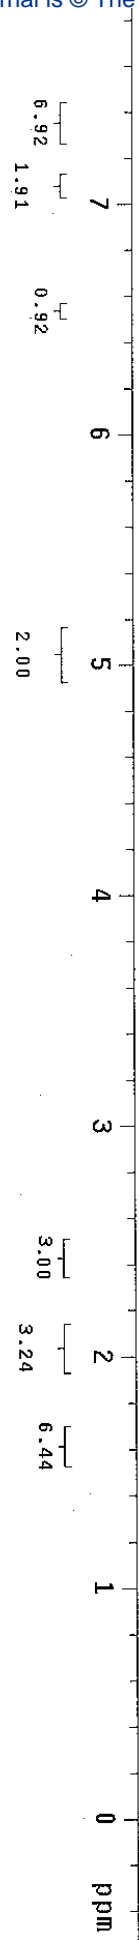

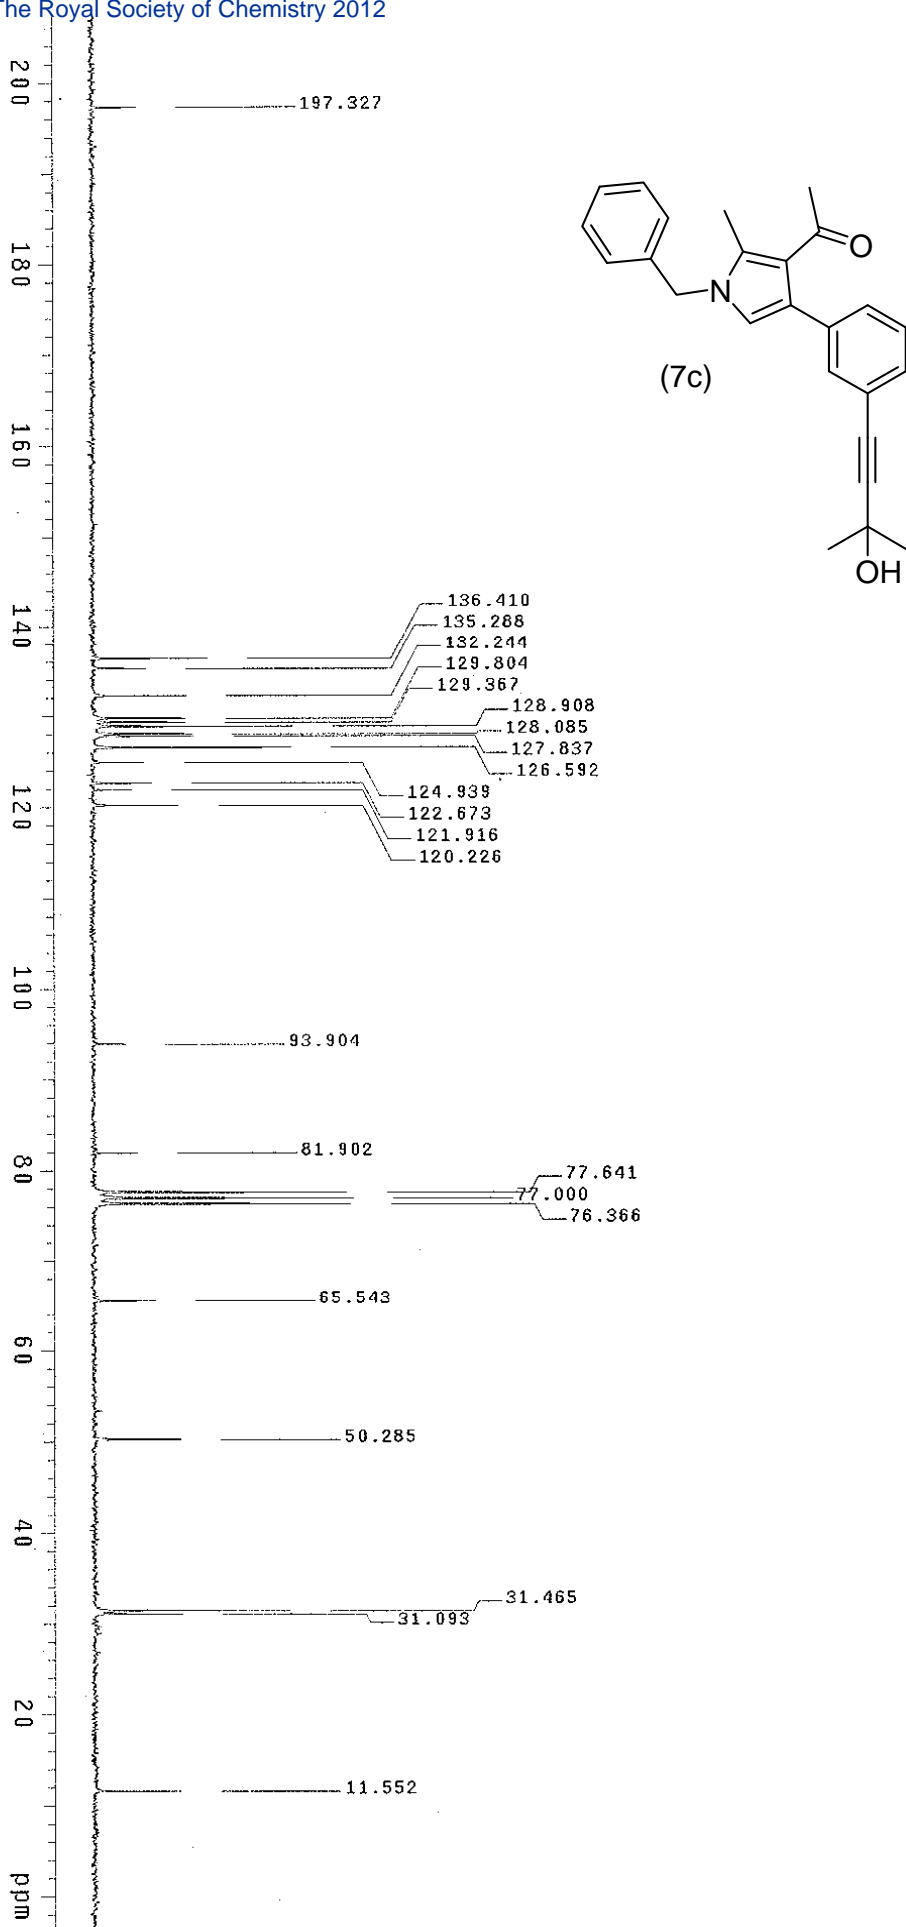

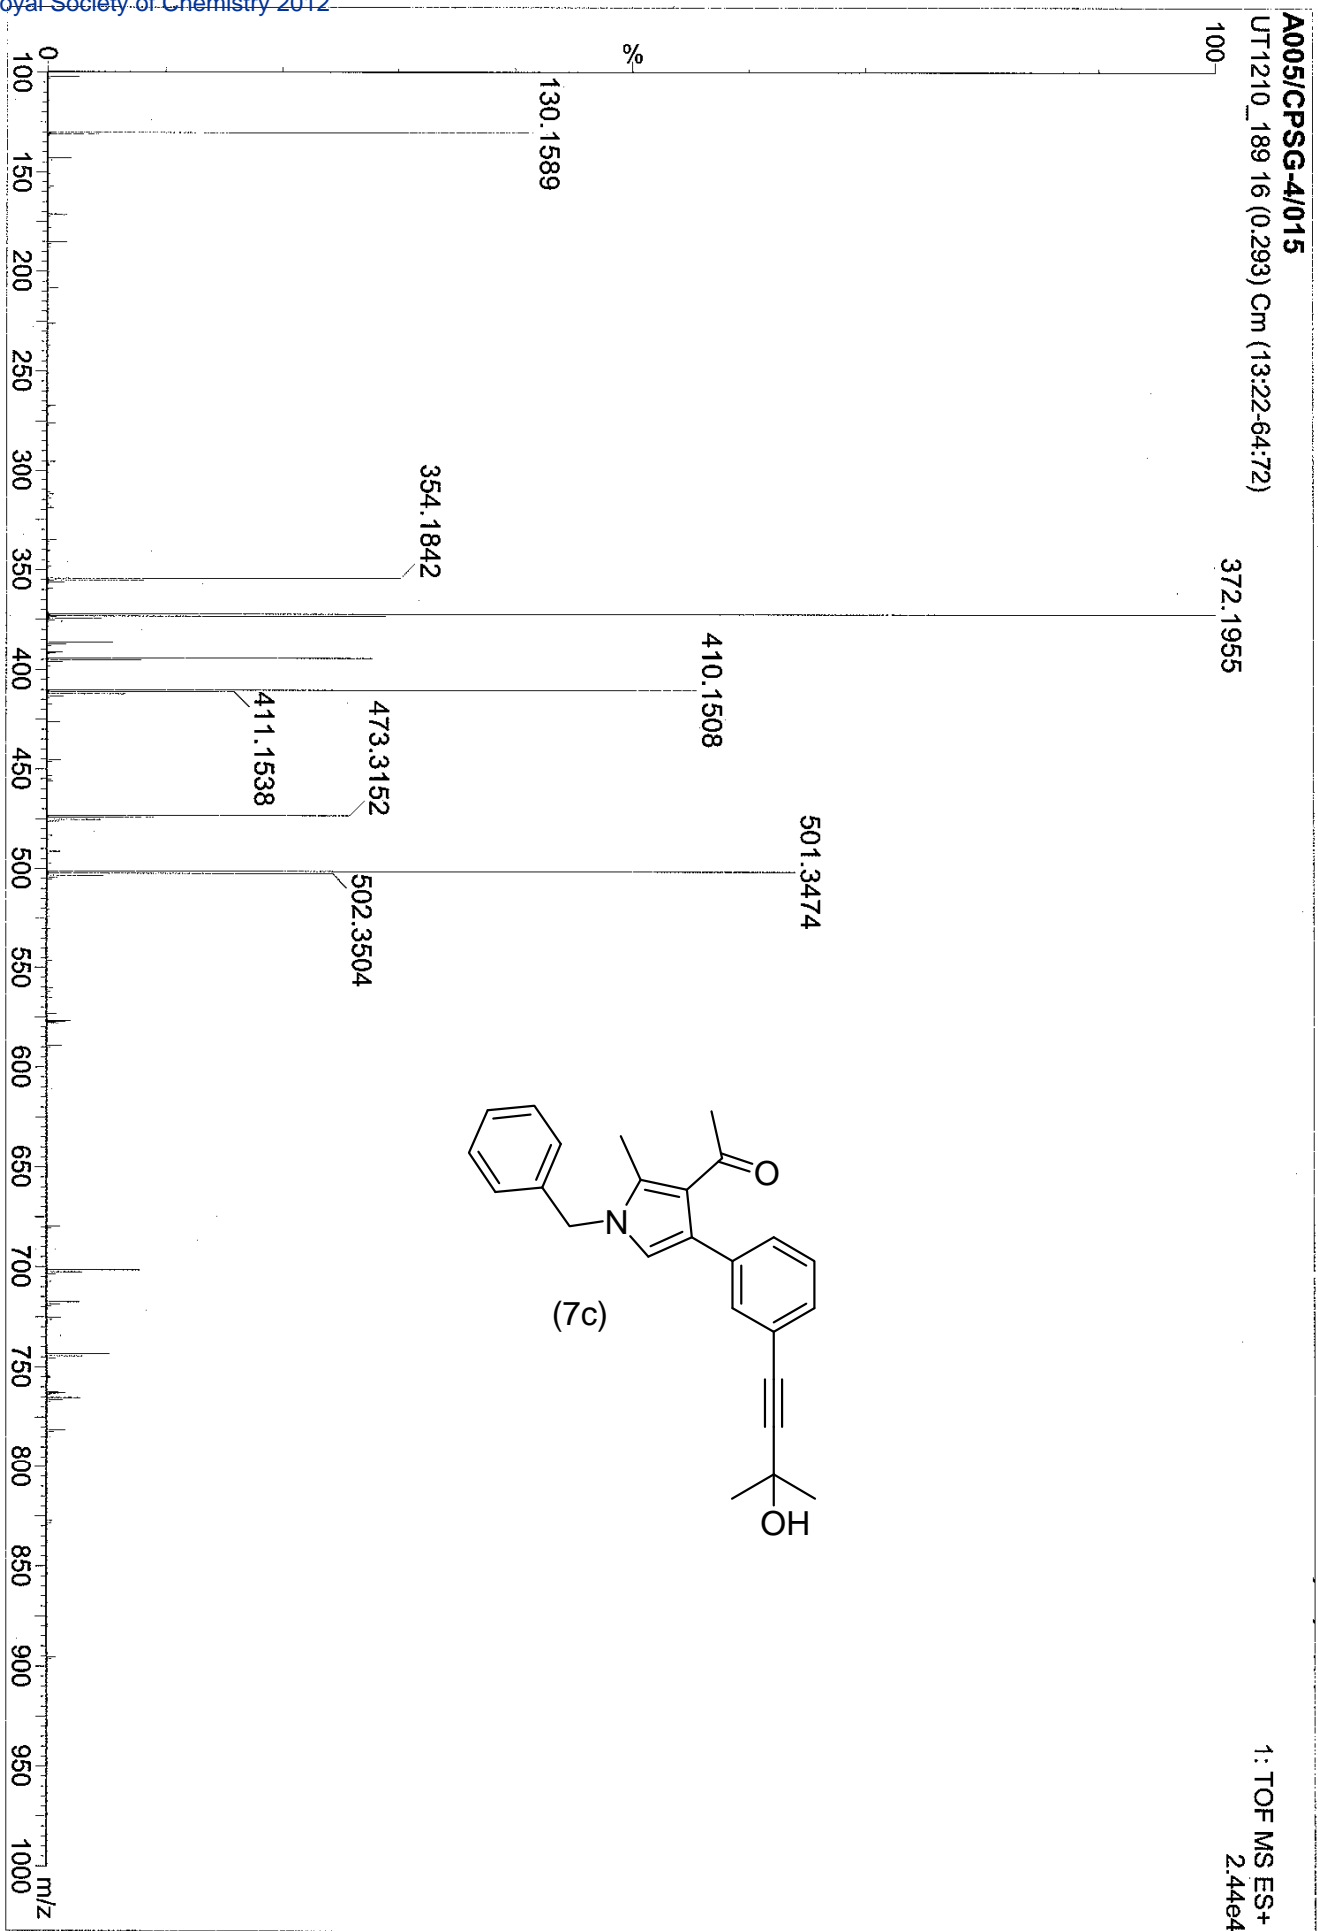

## Elemental Composition Report

### Single Mass Analysis

Tolerance = 5.0 PPM / DBE: min = -1.0, max = 80.0

Element prediction: Off

Number of isotope peaks used for i-FIT = 3

Monoisotopic Mass: Even Electron Ions

117 formula(e) evaluated with 1 results within limits (up to 4 best isotopic matches for each mass)

Elements Used:

C: 0-35 H: 0-60 N: 0-4 O: 0-4

A005/CPSSG-4/015

UT1210\_189 16 (0.293) Cm (13:22-64:72)

1: TOF MS ES+  
2.44e+004

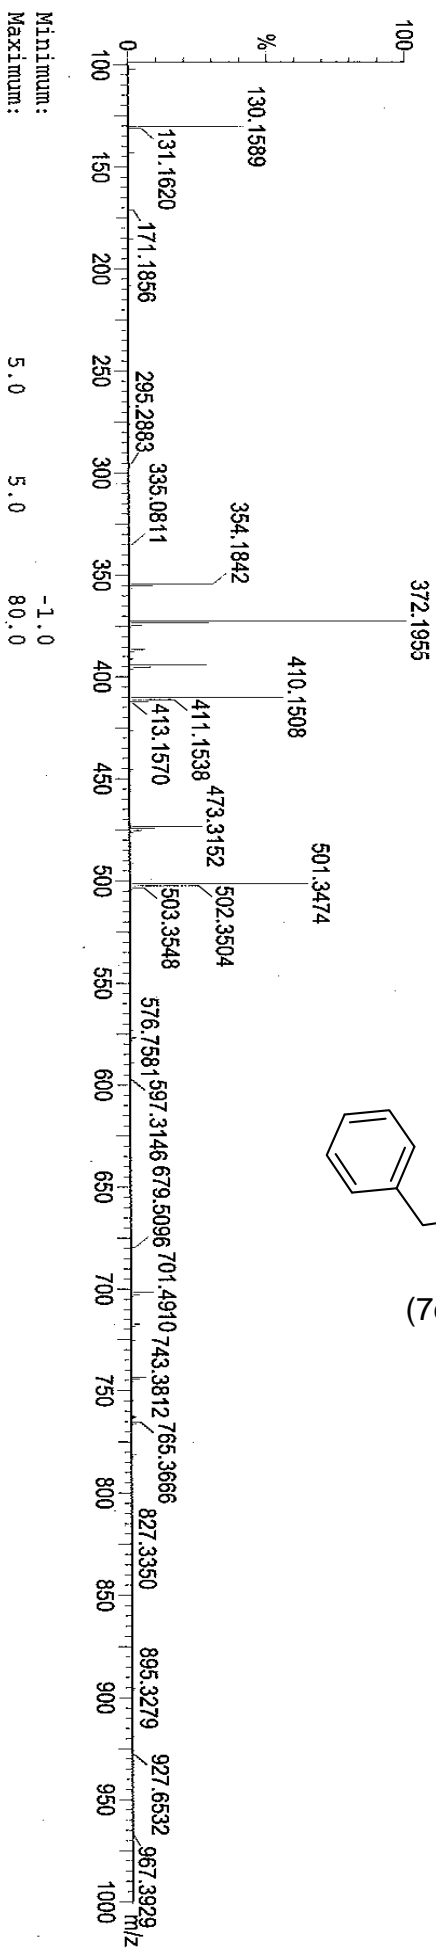

| Mass     | Calc. Mass | mDa  | PPM  | DBE  | i-FIT | Formula      |
|----------|------------|------|------|------|-------|--------------|
| 372.1955 | 372.1964   | -0.9 | -2.4 | 13.5 | 2.2   | C25 H26 N O2 |

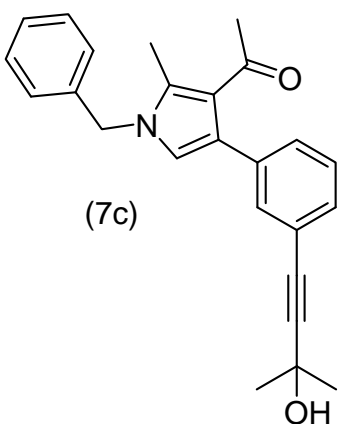

A005-CFSG-3-016 in CDCl3  
NMR-400

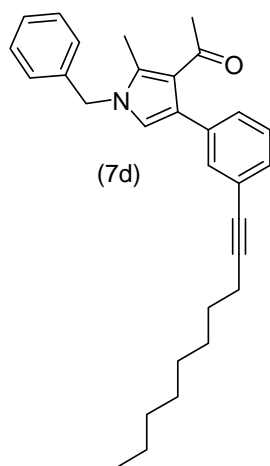

(7d)

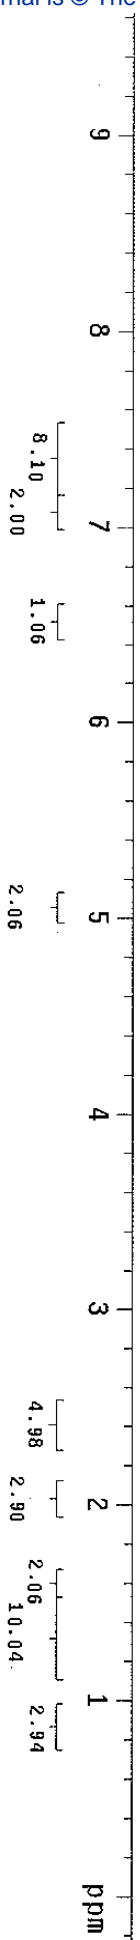

200  
180  
160  
140  
120  
100  
80  
60  
40  
20  
ppm

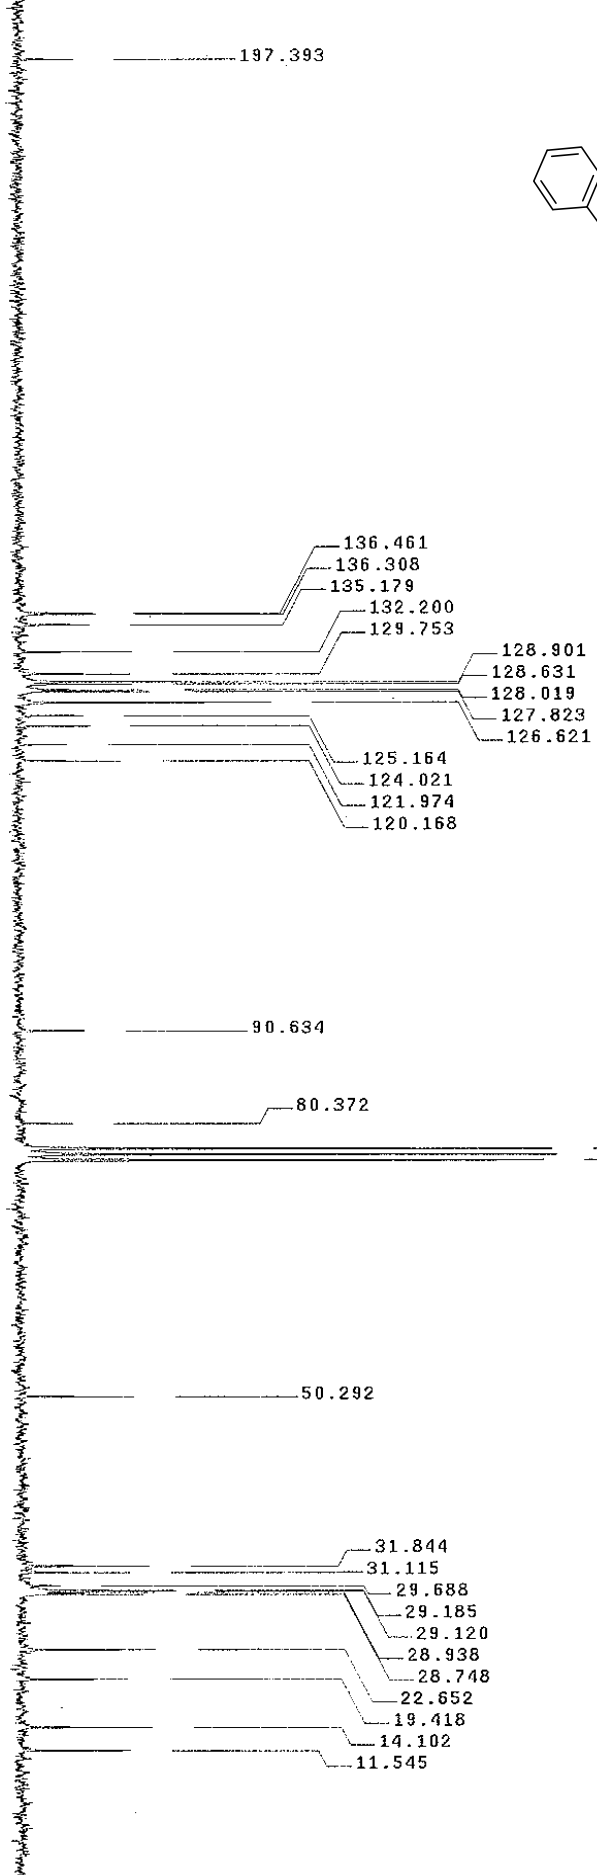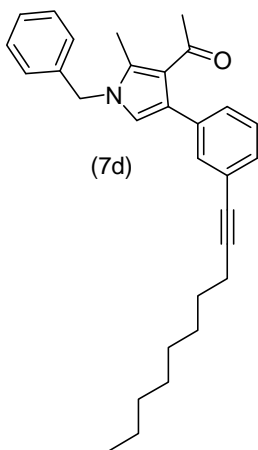

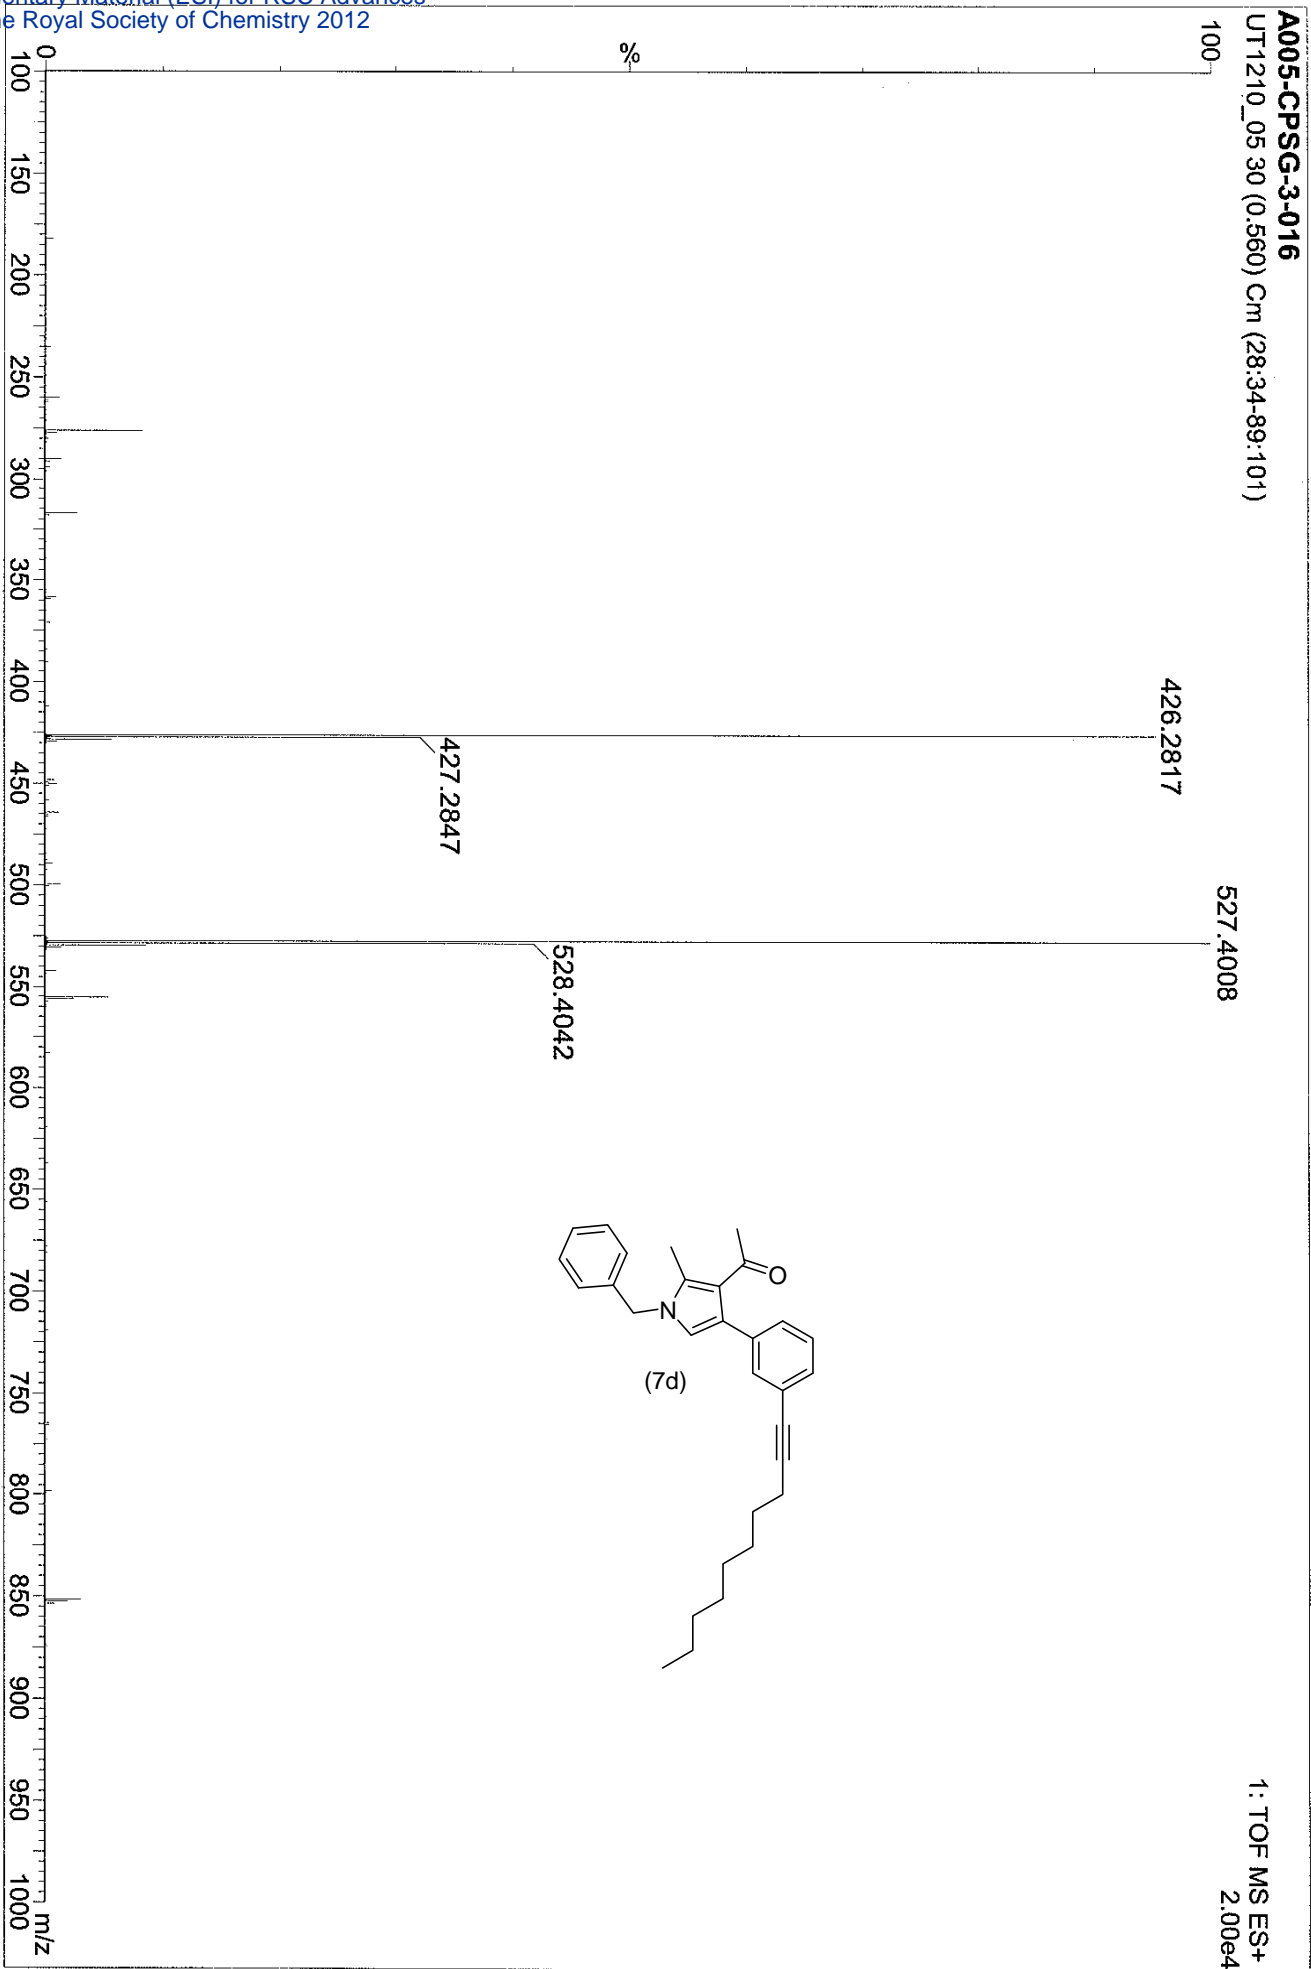



# Elemental Composition Report

## Single Mass Analysis

Tolerance = 10.0 PPM / DBE: min = -1.0, max = 80.0

Element prediction: Off

Number of isotope peaks used for i-FIT = 3

Monoisotopic Mass, Even Electron Ions

94 formula(e) evaluated with 1 results within limits (up to 4 best isotopic matches for each mass)

Elements Used:

C: 0-40 H: 0-55 N: 0-3 O: 0-4

A005-CPSG-3-016

UT1210\_05 30 (0.560) Cm (28:34-89:101)

1: TOF MS ES+  
2.00e+004

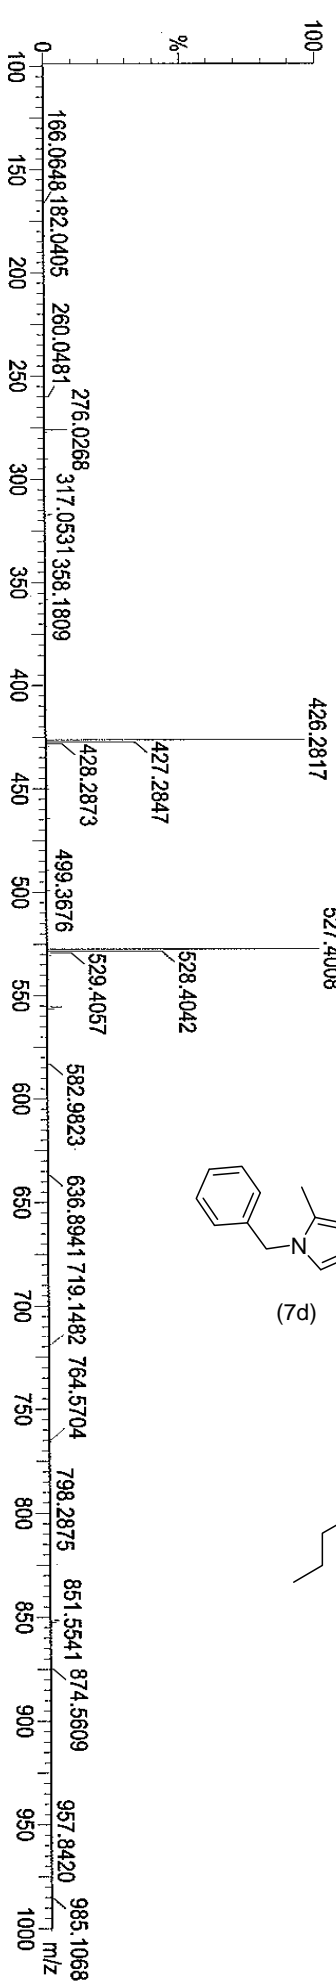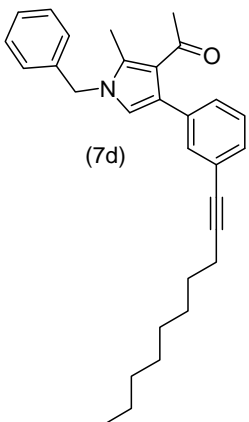

| Mass     | Calc. Mass | mDa | PPM | DBE  | i-FIT | Formula     |
|----------|------------|-----|-----|------|-------|-------------|
| 426.2817 | 426.2797   | 2.0 | 4.7 | 13.5 | 2.4   | C30 H36 N O |

Minimum: -1.0  
Maximum: 80.0

22

A005/CPSG-4/17 in CDCl<sub>3</sub>  
NMR-400

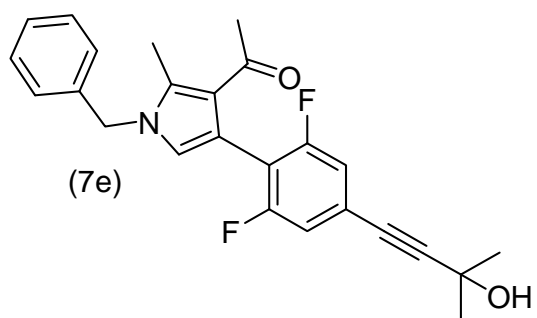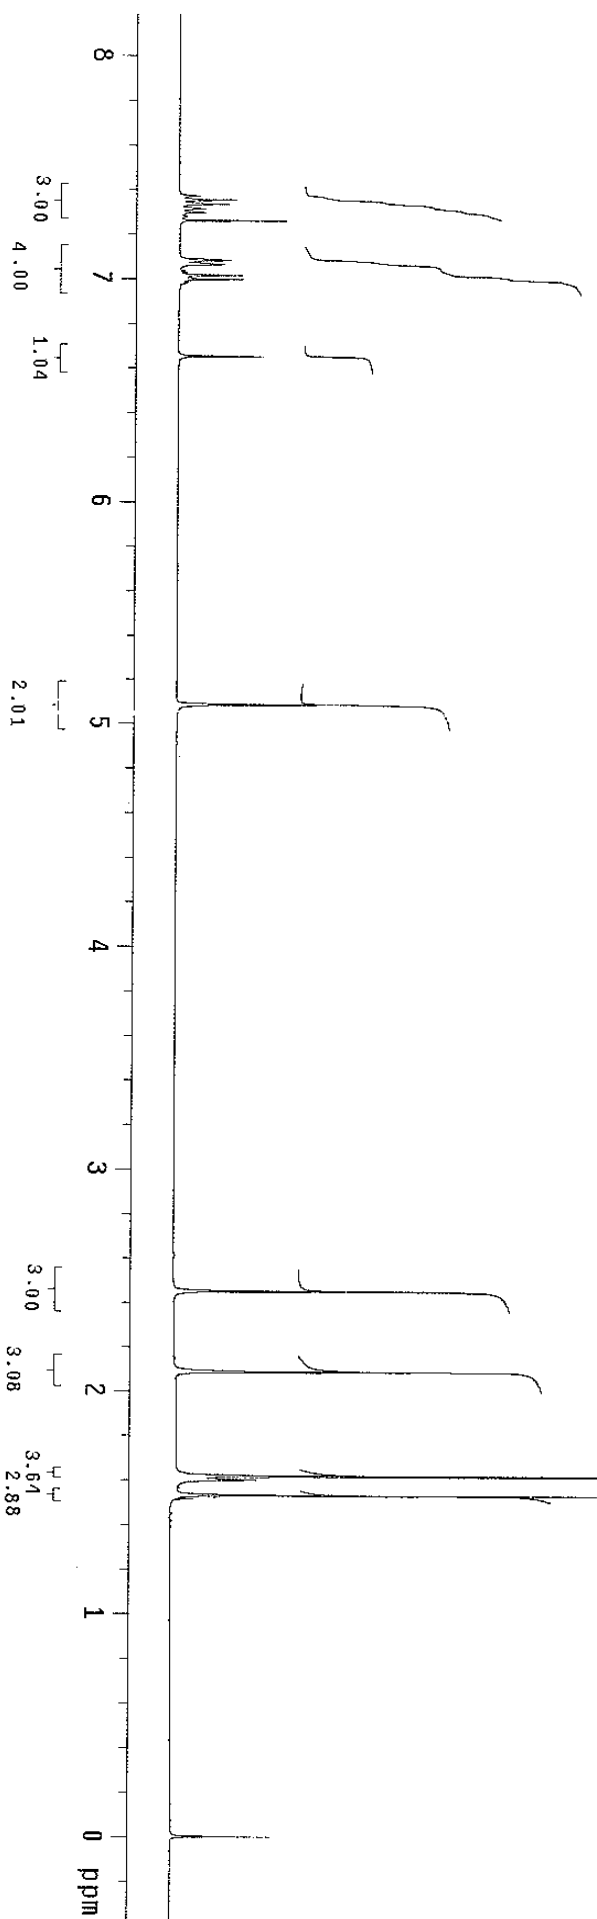

A005-CPSG-4-017 in CDCl<sub>3</sub>  
NMR-400

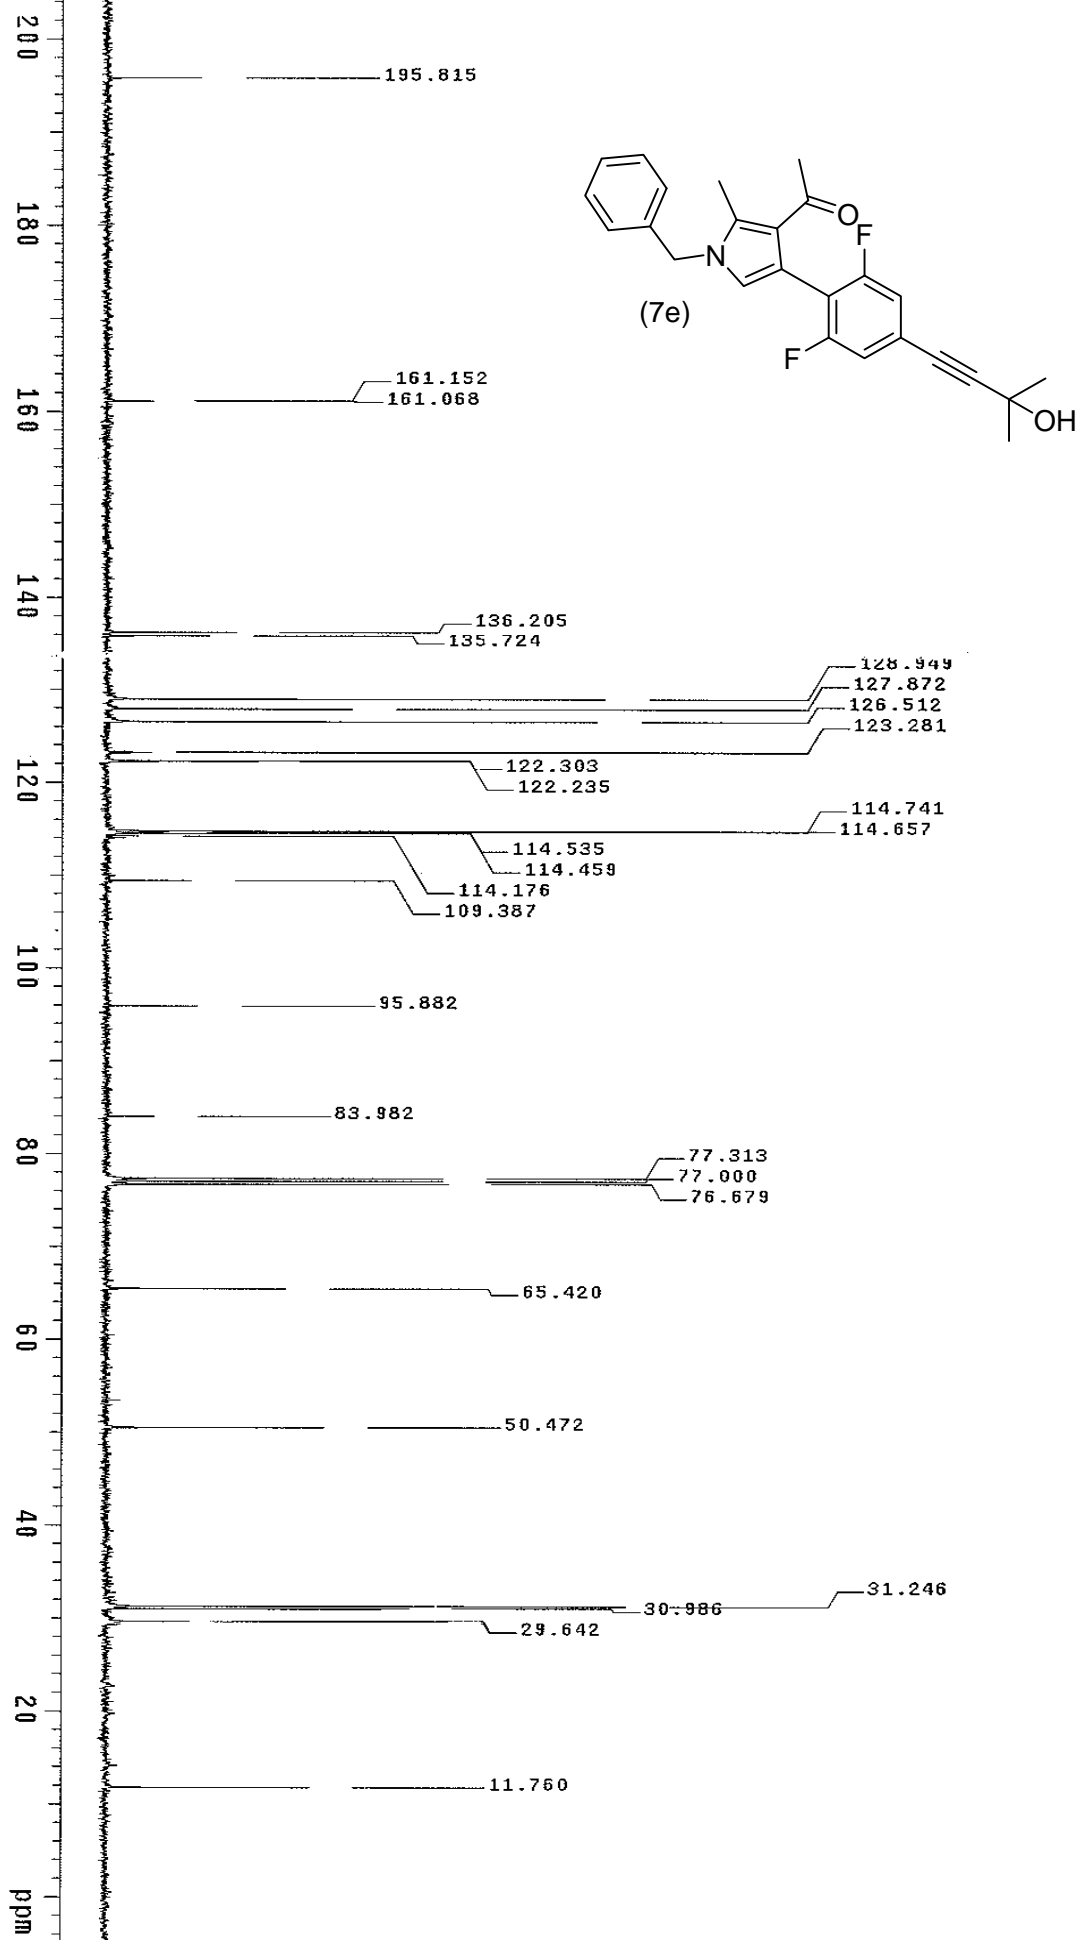

A005/CPSG-4/017

UT0211\_174 18 (0.338) Cm (18:24-78:88)

408.1774

1: TOF MS ES+  
3.42e4

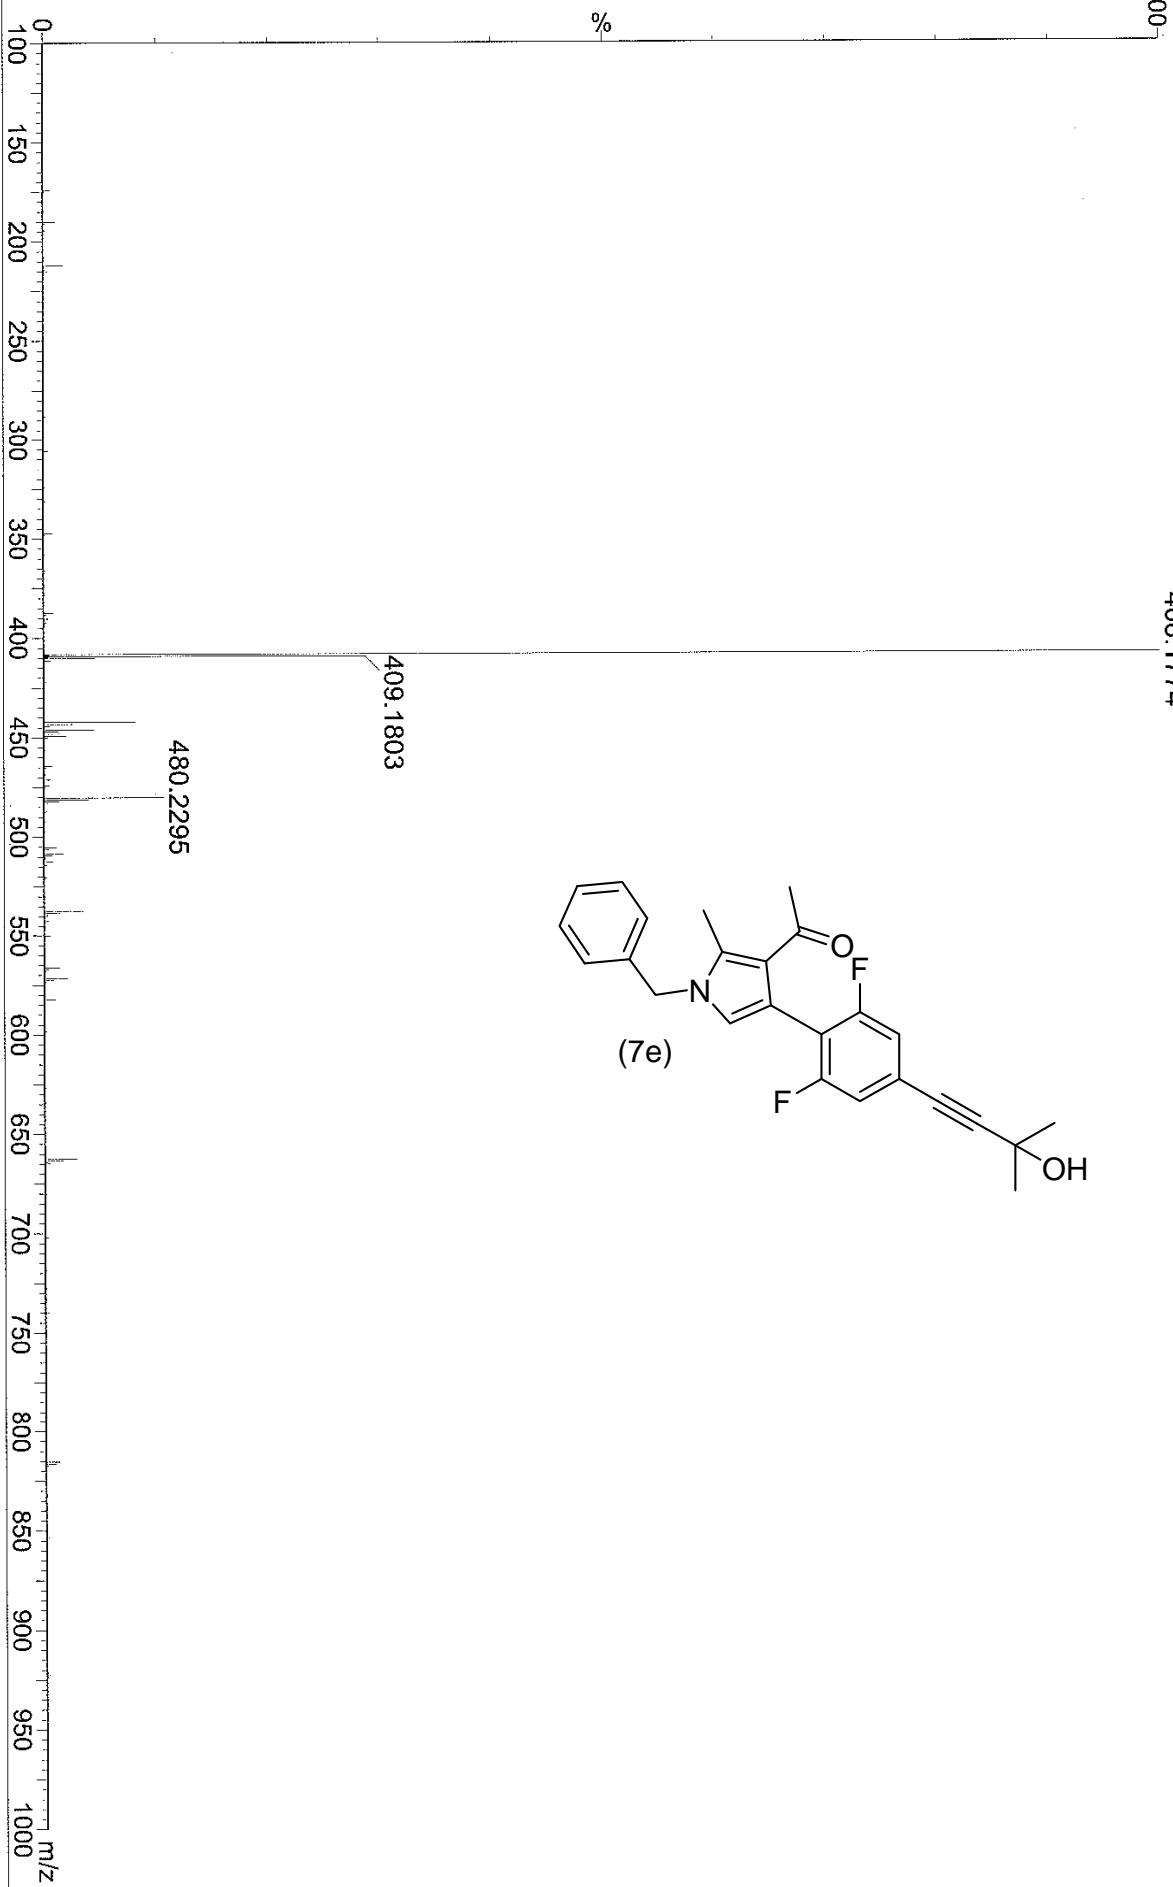

# Elemental Composition Report

## Single Mass Analysis

Tolerance = 5.0 PPM / DBE: min = -1.0, max = 80.0

Element prediction: Off

Number of isotope peaks used for i-FIT = 3

Monoisotopic Mass, Even Electron Ions

105 formula(e) evaluated with 3 results within limits (up to 4 closest results for each mass)

Elements Used:

C: 0-28 H: 0-35 N: 0-2 O: 0-3 F: 0-3

A005/CPSG-4/017

UT0211\_174.18 (0.338) Cm (18.24-78.88)

1: TOF MS ES+  
3.42e+004

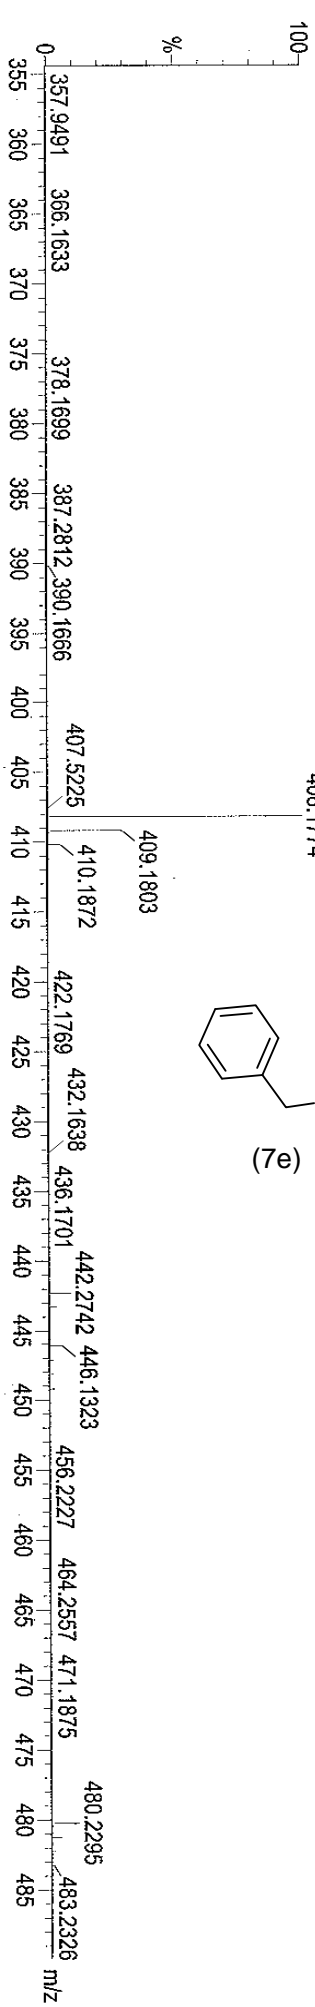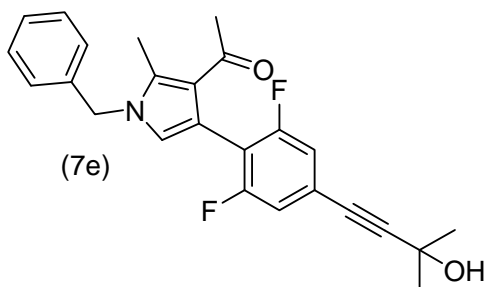

Minimum: -1.0  
Maximum: 80.0

| Mass     | Calc. Mass | mda  | PPM  | DBE  | i-FIT | Formula         |
|----------|------------|------|------|------|-------|-----------------|
| 408.1774 | 408.1775   | -0.1 | -0.2 | 13.5 | 1.6   | C25 H24 N O2 F2 |
